# Supplementary material for: Molecular Characterization of a Patient's Small Cell Carcinoma of the Ovary of the Hypercalcemic Type
Source: PubMed Central journal article supplement — J Cancer. 2012 Jan 26;3:58–66. doi: 10.7150/jca.3872 (PMC3273708; doi:10.7150/jca.3872), 2012-01-26
Supplement: jcav03p0058s1.pdf [file jcav03p0058s1.pdf]

| Gene Symbol | Log2 Ratio (Array #1) | P_value (Array #1) | Log2 Ratio (Array #2) | P_value (Array #2) | Average Log2 Ratio | Expresion Ratio (Tumor vs. Normal) |
|-------------|-----------------------|--------------------|-----------------------|--------------------|--------------------|------------------------------------|
| CDH10       | 9.4                   | 1.9E-23            | 8.9                   | 2.0E-23            | 9.1                | 561.4                              |
| NCAM2       | 8.1                   | 2.8E-23            | 7.5                   | 3.3E-23            | 7.8                | 223.9                              |
| PCDH20      | 7.2                   | 5.5E-23            | 7.3                   | 4.0E-23            | 7.3                | 154.7                              |
| NXPH1       | 7.9                   | 2.5E-23            | 6.5                   | 4.8E-23            | 7.2                | 150.7                              |
| KCNH8       | 6.4                   | 6.2E-23            | 7.1                   | 4.4E-23            | 6.8                | 107.7                              |
| FAM9C       | 6.8                   | 4.0E-23            | 6.4                   | 5.4E-23            | 6.6                | 94.6                               |
| NPTX1       | 6.3                   | 5.6E-23            | 6.4                   | 5.2E-23            | 6.3                | 80.3                               |
| ELAVL3      | 6.7                   | 1.6E-22            | 6.0                   | 3.7E-22            | 6.3                | 79.4                               |
| CNTNAP4     | 6.4                   | 5.7E-23            | 6.1                   | 7.6E-23            | 6.3                | 77.4                               |
| CHODL       | 6.3                   | 5.4E-23            | 6.2                   | 6.3E-23            | 6.2                | 75.8                               |
| LHX2        | 5.7                   | 1.4E-22            | 6.6                   | 5.7E-23            | 6.2                | 72.7                               |
| DPPA2       | 6.4                   | 6.9E-23            | 5.9                   | 1.1E-22            | 6.1                | 69.7                               |
| DPPA4       | 5.8                   | 1.1E-22            | 6.4                   | 5.1E-23            | 6.1                | 68.6                               |
| GALP        | 6.2                   | 2.1E-22            | 6.0                   | 3.5E-22            | 6.1                | 68.1                               |
| OLFM4       | 5.9                   | 1.6E-22            | 6.2                   | 1.6E-22            | 6.1                | 67.9                               |
| CTAG1A      | 5.8                   | 9.2E-23            | 6.1                   | 6.5E-23            | 6.0                | 62.6                               |
| MAGEA4      | 5.8                   | 9.7E-23            | 6.1                   | 6.4E-23            | 6.0                | 62.1                               |
| CSAG3       | 5.9                   | 8.8E-23            | 5.5                   | 1.4E-22            | 5.7                | 51.7                               |
| DMP1        | 5.8                   | 4.3E-21            | 5.5                   | 3.5E-21            | 5.7                | 50.5                               |
| ZIC1        | 5.9                   | 7.2E-21            | 5.4                   | 5.4E-21            | 5.7                | 50.5                               |
| SLC14A1     | 5.7                   | 1.8E-22            | 5.6                   | 2.1E-22            | 5.6                | 49.1                               |
| SGCG        | 5.1                   | 1.3E-21            | 5.8                   | 6.0E-22            | 5.5                | 44.2                               |
| C3orf57     | 5.2                   | 4.4E-22            | 5.8                   | 1.6E-22            | 5.5                | 44.0                               |
| C16orf73    | 5.7                   | 1.3E-22            | 5.2                   | 2.6E-22            | 5.4                | 43.4                               |
| CYP24A1     | 6.0                   | 1.5E-22            | 4.6                   | 2.1E-21            | 5.3                | 38.8                               |
| NKAIN2      | 4.9                   | 8.0E-21            | 5.5                   | 2.7E-21            | 5.2                | 37.1                               |
| BCHE        | 5.2                   | 2.6E-22            | 5.2                   | 2.4E-22            | 5.2                | 36.8                               |
| RNF17       | 4.9                   | 1.0E-21            | 5.5                   | 3.5E-22            | 5.2                | 36.8                               |
| TLX2        | 5.5                   | 2.9E-20            | 4.9                   | 1.3E-19            | 5.2                | 36.7                               |
| TMEM59L     | 5.1                   | 2.8E-22            | 5.3                   | 2.2E-22            | 5.2                | 36.5                               |
| NTS         | 5.7                   | 1.8E-22            | 4.6                   | 1.5E-21            | 5.2                | 35.8                               |
| SYCP2       | 5.1                   | 4.6E-22            | 5.1                   | 3.9E-22            | 5.1                | 34.5                               |
| OLIG1       | 5.0                   | 1.2E-20            | 5.1                   | 2.8E-20            | 5.0                | 32.8                               |
| CALB1       | 4.9                   | 5.6E-20            | 5.1                   | 3.7E-20            | 5.0                | 32.0                               |
| APC2        | 5.1                   | 3.1E-22            | 4.9                   | 5.0E-22            | 5.0                | 31.9                               |
| RORB        | 5.4                   | 4.2E-22            | 4.6                   | 2.7E-21            | 5.0                | 31.6                               |
| LPPR3       | 4.7                   | 7.2E-22            | 5.1                   | 2.9E-22            | 4.9                | 30.1                               |
| PDE4D       | 4.3                   | 8.9E-21            | 5.5                   | 4.8E-22            | 4.9                | 30.0                               |
| PSCA        | 4.9                   | 4.9E-22            | 4.8                   | 5.8E-22            | 4.8                | 28.4                               |
| ABCAS       | 4.8                   | 6.1E-22            | 4.8                   | 5.3E-22            | 4.8                | 27.8                               |
| SPAG6       | 4.6                   | 5.0E-18            | 4.9                   | 8.0E-19            | 4.8                | 27.1                               |
| VCX-C       | 4.7                   | 7.2E-22            | 4.7                   | 7.8E-22            | 4.7                | 26.2                               |
| SPAG17      | 5.0                   | 5.4E-19            | 4.3                   | 1.3E-16            | 4.7                | 25.5                               |
| SEMA3E      | 4.8                   | 1.3E-21            | 4.4                   | 3.9E-21            | 4.6                | 24.9                               |
| SLC7A10     | 4.4                   | 1.6E-21            | 4.8                   | 6.2E-22            | 4.6                | 24.4                               |
| CADM2       | 4.6                   | 2.3E-20            | 4.5                   | 1.0E-19            | 4.6                | 24.1                               |
| NKAIN1      | 4.7                   | 8.8E-22            | 4.5                   | 1.5E-21            | 4.6                | 23.8                               |
| DGKB        | 4.2                   | 2.2E-19            | 4.9                   | 1.4E-19            | 4.6                | 23.4                               |
| JAKMIP1     | 4.7                   | 9.5E-22            | 4.3                   | 3.0E-21            | 4.5                | 22.9                               |
| BCL2A1      | 4.5                   | 1.3E-21            | 4.5                   | 1.4E-21            | 4.5                | 22.6                               |
| CRMP1       | 4.4                   | 1.9E-21            | 4.6                   | 1.1E-21            | 4.5                | 22.3                               |
| TMEFF2      | 4.7                   | 2.7E-21            | 4.2                   | 6.2E-21            | 4.5                | 22.0                               |
| GCNT2       | 4.6                   | 1.8E-20            | 4.2                   | 7.4E-20            | 4.4                | 21.6                               |
| DPYSL5      | 4.3                   | 3.6E-21            | 4.5                   | 1.8E-21            | 4.4                | 21.2                               |
| GPR3        | 4.1                   | 3.4E-20            | 4.7                   | 1.4E-21            | 4.4                | 21.1                               |
| TP53TG3     | 4.3                   | 3.9E-21            | 4.3                   | 3.8E-21            | 4.3                | 20.2                               |
| CBLN2       | 4.5                   | 4.4E-21            | 4.2                   | 1.1E-20            | 4.3                | 20.1                               |
| GAP43       | 4.1                   | 6.7E-21            | 4.6                   | 1.1E-21            | 4.3                | 20.1                               |
| MYEF2       | 4.4                   | 4.9E-21            | 4.3                   | 6.7E-21            | 4.3                | 19.9                               |
| MAST1       | 4.3                   | 2.8E-21            | 4.3                   | 2.3E-21            | 4.3                | 19.8                               |

|          |     |         |     |         |     |      |
|----------|-----|---------|-----|---------|-----|------|
| LMX1B    | 3.6 | 3.6E-14 | 5.0 | 3.8E-20 | 4.3 | 19.7 |
| MT3      | 4.2 | 5.1E-21 | 4.4 | 1.7E-21 | 4.3 | 19.7 |
| SLC25A41 | 4.5 | 3.4E-21 | 4.0 | 1.6E-20 | 4.3 | 19.6 |
| OR5F1    | 4.0 | 1.6E-20 | 4.6 | 1.4E-21 | 4.3 | 19.5 |
| SYCE1    | 4.2 | 1.1E-19 | 4.4 | 5.5E-19 | 4.3 | 19.2 |
| ZDHHC22  | 4.7 | 1.2E-21 | 3.8 | 2.2E-20 | 4.3 | 19.1 |
| CYP26A1  | 4.2 | 1.1E-20 | 4.3 | 7.2E-21 | 4.3 | 19.0 |
| FBXL16   | 4.2 | 4.3E-21 | 4.3 | 2.9E-21 | 4.2 | 18.9 |
| DSC1     | 4.7 | 6.1E-16 | 3.7 | 1.3E-12 | 4.2 | 18.2 |
| BTBD16   | 4.2 | 4.3E-21 | 4.1 | 5.0E-21 | 4.2 | 17.8 |
| CRLF1    | 4.1 | 5.6E-21 | 4.2 | 4.3E-21 | 4.1 | 17.7 |
| ATCAY    | 4.2 | 4.1E-21 | 4.1 | 5.9E-21 | 4.1 | 17.6 |
| REXO1L1  | 3.6 | 1.2E-17 | 4.6 | 2.5E-18 | 4.1 | 17.3 |
| C11orf41 | 4.1 | 3.9E-17 | 4.0 | 7.1E-16 | 4.1 | 17.0 |
| EEF1A2   | 4.5 | 1.9E-20 | 3.6 | 2.4E-18 | 4.1 | 16.8 |
| GLRB     | 3.7 | 1.3E-12 | 4.5 | 7.3E-21 | 4.1 | 16.8 |
| C12orf39 | 4.0 | 1.8E-20 | 4.1 | 8.0E-21 | 4.0 | 16.4 |
| STMN2    | 4.0 | 8.8E-21 | 4.1 | 6.4E-21 | 4.0 | 16.3 |
| HP       | 4.0 | 7.9E-21 | 4.0 | 7.1E-21 | 4.0 | 16.3 |
| HPR      | 4.0 | 7.9E-21 | 4.0 | 7.1E-21 | 4.0 | 16.3 |
| NOG      | 4.2 | 2.7E-20 | 3.8 | 7.4E-20 | 4.0 | 16.1 |
| ANKDD1A  | 3.7 | 6.3E-20 | 4.3 | 2.4E-21 | 4.0 | 16.0 |
| PLEKHO2  | 3.7 | 6.3E-20 | 4.3 | 2.4E-21 | 4.0 | 16.0 |
| DDX43    | 3.7 | 4.8E-20 | 4.3 | 2.6E-21 | 4.0 | 15.9 |
| INA      | 4.7 | 2.6E-21 | 3.3 | 6.6E-19 | 4.0 | 15.9 |
| GPR139   | 3.7 | 7.7E-19 | 4.3 | 6.3E-21 | 4.0 | 15.9 |
| MC1R     | 3.9 | 1.2E-20 | 4.1 | 6.6E-21 | 4.0 | 15.8 |
| TUBB3    | 3.9 | 1.2E-20 | 4.1 | 6.6E-21 | 4.0 | 15.8 |
| MSX2     | 4.0 | 6.9E-21 | 3.9 | 1.3E-20 | 4.0 | 15.7 |
| KCNV2    | 3.7 | 4.2E-18 | 4.3 | 1.1E-20 | 4.0 | 15.5 |
| RAB6B    | 4.1 | 1.2E-20 | 3.8 | 3.3E-20 | 4.0 | 15.5 |
| FAM5C    | 4.0 | 3.9E-20 | 3.9 | 3.6E-20 | 4.0 | 15.5 |
| PRSS12   | 4.0 | 9.4E-21 | 3.9 | 1.2E-20 | 3.9 | 15.4 |
| NKX2-5   | 4.0 | 1.6E-20 | 3.9 | 1.6E-20 | 3.9 | 15.4 |
| SOLH     | 3.7 | 4.2E-20 | 4.1 | 5.5E-21 | 3.9 | 14.9 |
| FAM57B   | 3.4 | 4.1E-16 | 4.4 | 3.0E-17 | 3.9 | 14.9 |
| IRX2     | 3.8 | 1.1E-19 | 4.0 | 2.9E-20 | 3.9 | 14.8 |
| HAPLN1   | 3.8 | 1.8E-20 | 3.9 | 1.3E-20 | 3.9 | 14.7 |
| FGF5     | 4.5 | 1.6E-17 | 3.3 | 1.0E-13 | 3.9 | 14.7 |
| SLITRK6  | 4.1 | 1.3E-20 | 3.7 | 7.6E-20 | 3.9 | 14.6 |
| EPHA5    | 3.9 | 1.2E-10 | 3.9 | 2.5E-12 | 3.9 | 14.6 |
| MANEAL   | 3.8 | 1.9E-20 | 3.9 | 1.5E-20 | 3.9 | 14.5 |
| FGG      | 4.5 | 5.8E-21 | 3.1 | 4.7E-18 | 3.8 | 14.3 |
| CCK      | 3.8 | 1.9E-18 | 3.8 | 2.0E-19 | 3.8 | 14.2 |
| GNG13    | 3.3 | 5.2E-19 | 4.3 | 3.0E-21 | 3.8 | 14.0 |
| FEZF1    | 4.2 | 6.5E-13 | 3.4 | 2.0E-09 | 3.8 | 13.9 |
| CHP2     | 3.8 | 3.8E-20 | 3.8 | 5.3E-20 | 3.8 | 13.9 |
| SPACA3   | 3.5 | 4.6E-19 | 4.0 | 1.1E-20 | 3.8 | 13.8 |
| RIT2     | 3.4 | 3.2E-19 | 4.2 | 3.8E-21 | 3.8 | 13.8 |
| CYP2B6   | 3.4 | 2.2E-18 | 4.1 | 6.1E-21 | 3.7 | 13.4 |
| CELSR3   | 3.8 | 2.1E-20 | 3.7 | 3.9E-20 | 3.7 | 13.4 |
| SOX17    | 3.9 | 1.5E-20 | 3.6 | 5.9E-20 | 3.7 | 13.3 |
| CHRNA4   | 3.6 | 3.2E-14 | 3.8 | 2.1E-17 | 3.7 | 13.1 |
| GCGR     | 3.5 | 1.4E-17 | 3.9 | 4.3E-19 | 3.7 | 13.1 |
| CDH18    | 3.3 | 1.6E-17 | 4.1 | 3.9E-19 | 3.7 | 13.0 |
| HRK      | 4.0 | 4.7E-20 | 3.4 | 7.9E-19 | 3.7 | 13.0 |
| CHN1     | 3.5 | 8.1E-20 | 3.8 | 1.7E-20 | 3.7 | 12.9 |
| HIF3A    | 3.6 | 8.9E-20 | 3.7 | 4.3E-20 | 3.7 | 12.9 |
| SORBS2   | 3.7 | 3.6E-20 | 3.6 | 5.1E-20 | 3.7 | 12.9 |
| PITX2    | 3.6 | 1.5E-19 | 3.7 | 7.5E-20 | 3.7 | 12.8 |
| PRAME    | 3.9 | 1.4E-20 | 3.5 | 1.4E-19 | 3.7 | 12.8 |
| TRPA1    | 4.2 | 2.2E-20 | 3.1 | 4.4E-18 | 3.7 | 12.7 |

|          |     |         |     |         |     |      |
|----------|-----|---------|-----|---------|-----|------|
| SPATA3   | 3.7 | 6.3E-19 | 3.6 | 9.4E-20 | 3.7 | 12.7 |
| DLX3     | 3.5 | 5.0E-19 | 3.8 | 2.5E-20 | 3.6 | 12.5 |
| PPID     | 3.4 | 1.5E-19 | 3.8 | 1.6E-20 | 3.6 | 12.5 |
| E2F5     | 3.6 | 4.7E-20 | 3.6 | 6.4E-20 | 3.6 | 12.3 |
| ZFP42    | 3.8 | 1.0E-10 | 3.4 | 5.8E-10 | 3.6 | 12.1 |
| SPATA8   | 3.3 | 3.6E-13 | 3.9 | 6.7E-13 | 3.6 | 12.0 |
| ESX1     | 3.0 | 6.2E-14 | 4.2 | 6.1E-16 | 3.6 | 11.9 |
| BAI2     | 3.7 | 4.3E-20 | 3.4 | 2.0E-19 | 3.6 | 11.9 |
| RBM24    | 3.3 | 1.4E-17 | 3.8 | 1.2E-19 | 3.6 | 11.9 |
| PAX4     | 3.4 | 1.9E-19 | 3.7 | 3.3E-20 | 3.6 | 11.9 |
| MYOD1    | 3.4 | 3.1E-19 | 3.8 | 2.7E-20 | 3.6 | 11.8 |
| ANKRD18A | 3.5 | 4.0E-17 | 3.7 | 9.5E-19 | 3.6 | 11.8 |
| C21orf15 | 3.5 | 4.0E-17 | 3.7 | 9.5E-19 | 3.6 | 11.8 |
| DLG4     | 3.5 | 1.4E-19 | 3.6 | 5.9E-20 | 3.5 | 11.7 |
| CTNNA2   | 3.2 | 7.2E-14 | 3.8 | 4.2E-13 | 3.5 | 11.7 |
| KIRREL2  | 3.6 | 5.1E-20 | 3.4 | 1.6E-19 | 3.5 | 11.6 |
| HOXC10   | 3.3 | 4.9E-19 | 3.7 | 3.3E-20 | 3.5 | 11.6 |
| UCHL1    | 3.5 | 1.1E-19 | 3.6 | 7.1E-20 | 3.5 | 11.6 |
| USP44    | 4.0 | 9.9E-18 | 3.1 | 1.9E-15 | 3.5 | 11.6 |
| AVPR2    | 3.3 | 1.8E-18 | 3.7 | 4.6E-20 | 3.5 | 11.5 |
| FGFR1    | 3.7 | 4.3E-20 | 3.4 | 2.4E-19 | 3.5 | 11.5 |
| STOX2    | 3.5 | 1.4E-19 | 3.5 | 8.5E-20 | 3.5 | 11.4 |
| CELF4    | 3.6 | 9.6E-20 | 3.4 | 2.1E-19 | 3.5 | 11.3 |
| CHRNA3   | 3.5 | 6.3E-15 | 3.5 | 1.5E-15 | 3.5 | 11.2 |
| TMEM195  | 3.5 | 7.4E-18 | 3.4 | 7.6E-17 | 3.5 | 11.2 |
| RTN4RL1  | 3.4 | 3.4E-19 | 3.6 | 7.7E-20 | 3.5 | 11.1 |
| DNASE1L2 | 3.4 | 2.5E-19 | 3.5 | 1.7E-19 | 3.5 | 11.0 |
| MFAP5    | 3.4 | 3.0E-19 | 3.5 | 1.7E-19 | 3.4 | 10.8 |
| KBTBD8   | 3.1 | 9.9E-18 | 3.7 | 1.5E-19 | 3.4 | 10.7 |
| CHRNA1   | 3.5 | 3.6E-19 | 3.3 | 1.0E-18 | 3.4 | 10.6 |
| CPT1C    | 3.5 | 1.4E-19 | 3.3 | 2.9E-19 | 3.4 | 10.6 |
| UPK1A    | 3.0 | 2.8E-17 | 3.8 | 1.8E-19 | 3.4 | 10.4 |
| KCNH3    | 3.4 | 9.0E-19 | 3.4 | 6.3E-19 | 3.4 | 10.4 |
| DPEP3    | 3.7 | 4.1E-20 | 3.0 | 3.9E-18 | 3.4 | 10.3 |
| NANOG    | 3.3 | 4.8E-19 | 3.4 | 2.6E-19 | 3.4 | 10.3 |
| NANOGP8  | 3.3 | 4.8E-19 | 3.4 | 2.6E-19 | 3.4 | 10.3 |
| HSPA1A   | 3.3 | 5.6E-19 | 3.5 | 1.4E-19 | 3.4 | 10.2 |
| PSMB11   | 3.1 | 4.1E-18 | 3.6 | 1.1E-19 | 3.4 | 10.2 |
| CBLN1    | 3.8 | 2.8E-19 | 2.9 | 1.8E-16 | 3.3 | 10.2 |
| TBX1     | 3.3 | 3.5E-19 | 3.4 | 2.7E-19 | 3.3 | 10.1 |
| CYP4B1   | 3.4 | 2.2E-19 | 3.3 | 4.5E-19 | 3.3 | 10.1 |
| GPM6A    | 3.3 | 9.2E-19 | 3.4 | 3.5E-19 | 3.3 | 10.0 |
| MAGEC1   | 3.1 | 7.0E-18 | 3.5 | 2.4E-19 | 3.3 | 9.9  |
| RTTN     | 3.3 | 5.6E-19 | 3.3 | 3.4E-19 | 3.3 | 9.8  |
| CNR1     | 3.2 | 8.2E-15 | 3.4 | 2.5E-14 | 3.3 | 9.7  |
| GLIS2    | 3.1 | 6.9E-18 | 3.5 | 1.3E-19 | 3.3 | 9.7  |
| THEG     | 3.3 | 6.3E-16 | 3.2 | 5.8E-18 | 3.3 | 9.7  |
| ANKRD32  | 3.3 | 3.2E-19 | 3.2 | 8.7E-19 | 3.3 | 9.6  |
| CHI3L1   | 3.3 | 6.4E-19 | 3.3 | 5.8E-19 | 3.3 | 9.6  |
| TACR2    | 3.1 | 8.8E-18 | 3.5 | 1.7E-19 | 3.3 | 9.6  |
| LELP1    | 3.1 | 2.8E-18 | 3.4 | 2.6E-19 | 3.3 | 9.5  |
| HIST1H3D | 3.3 | 1.7E-18 | 3.2 | 1.9E-18 | 3.2 | 9.5  |
| ATF7IP2  | 3.4 | 2.1E-19 | 3.1 | 2.3E-18 | 3.2 | 9.5  |
| DISP2    | 3.2 | 6.0E-19 | 3.2 | 5.7E-19 | 3.2 | 9.5  |
| DKK1     | 3.4 | 1.8E-18 | 3.1 | 1.1E-17 | 3.2 | 9.4  |
| MAP2K6   | 3.4 | 2.2E-19 | 3.1 | 2.3E-18 | 3.2 | 9.4  |
| GPR152   | 3.4 | 6.8E-19 | 3.1 | 2.7E-18 | 3.2 | 9.3  |
| CGRRF1   | 3.1 | 1.7E-18 | 3.3 | 2.9E-19 | 3.2 | 9.3  |
| RIMS3    | 3.3 | 4.9E-19 | 3.1 | 1.7E-18 | 3.2 | 9.3  |
| PRRT2    | 3.3 | 4.2E-19 | 3.1 | 1.6E-18 | 3.2 | 9.2  |
| SIX3     | 3.2 | 1.5E-18 | 3.2 | 6.4E-19 | 3.2 | 9.2  |
| ABCA3    | 3.2 | 6.7E-19 | 3.1 | 1.5E-18 | 3.2 | 9.1  |

|           |     |         |     |         |     |     |
|-----------|-----|---------|-----|---------|-----|-----|
| HEY2      | 3.3 | 2.1E-18 | 3.0 | 1.7E-17 | 3.2 | 9.1 |
| UPK1B     | 3.1 | 6.2E-18 | 3.3 | 1.3E-18 | 3.2 | 9.1 |
| NEFM      | 3.3 | 4.0E-19 | 3.1 | 2.3E-18 | 3.2 | 9.1 |
| UCN2      | 3.1 | 1.4E-18 | 3.2 | 6.7E-19 | 3.2 | 9.1 |
| SYN1      | 3.1 | 2.2E-18 | 3.3 | 4.6E-19 | 3.2 | 9.0 |
| KCNE1     | 3.0 | 4.8E-08 | 3.3 | 7.5E-14 | 3.2 | 9.0 |
| CTSL2     | 3.3 | 5.5E-19 | 3.1 | 2.2E-18 | 3.2 | 8.9 |
| ZNF454    | 3.0 | 9.3E-15 | 3.3 | 1.2E-15 | 3.1 | 8.8 |
| RASL10A   | 3.4 | 2.2E-19 | 2.9 | 1.6E-17 | 3.1 | 8.8 |
| KIF21A    | 3.1 | 1.4E-17 | 3.1 | 8.1E-18 | 3.1 | 8.7 |
| SLITRK3   | 2.9 | 3.6E-15 | 3.3 | 6.2E-16 | 3.1 | 8.7 |
| SCUBE2    | 3.3 | 7.2E-18 | 3.0 | 1.6E-16 | 3.1 | 8.7 |
| TLE2      | 3.0 | 2.6E-18 | 3.2 | 9.6E-19 | 3.1 | 8.7 |
| LRRTM2    | 2.8 | 2.7E-08 | 3.4 | 4.8E-14 | 3.1 | 8.6 |
| TOX2      | 3.2 | 6.6E-19 | 3.0 | 4.6E-18 | 3.1 | 8.6 |
| FAM65C    | 3.0 | 6.2E-15 | 3.2 | 9.4E-15 | 3.1 | 8.6 |
| TMEFF1    | 3.3 | 1.7E-17 | 2.9 | 1.3E-16 | 3.1 | 8.5 |
| UBE2E1    | 3.1 | 5.4E-18 | 3.1 | 7.2E-18 | 3.1 | 8.5 |
| RGS9      | 2.9 | 9.5E-18 | 3.3 | 5.0E-19 | 3.1 | 8.5 |
| NNAT      | 2.8 | 5.7E-17 | 3.4 | 4.2E-19 | 3.1 | 8.4 |
| NETO2     | 3.1 | 1.9E-18 | 3.0 | 3.6E-18 | 3.1 | 8.3 |
| C2orf65   | 3.0 | 1.7E-08 | 3.1 | 6.4E-08 | 3.1 | 8.3 |
| CACNA1B   | 3.1 | 9.3E-16 | 3.0 | 1.9E-17 | 3.0 | 8.3 |
| MAMDC4    | 3.2 | 1.1E-18 | 2.9 | 6.8E-18 | 3.0 | 8.3 |
| HIST1H2AE | 3.2 | 8.4E-19 | 2.9 | 1.1E-17 | 3.0 | 8.2 |
| C22orf31  | 2.9 | 1.6E-15 | 3.2 | 3.0E-18 | 3.0 | 8.2 |
| NLRP2     | 3.1 | 1.8E-18 | 3.0 | 4.9E-18 | 3.0 | 8.2 |
| ZSCAN10   | 2.8 | 2.2E-17 | 3.2 | 6.9E-19 | 3.0 | 8.2 |
| B3GAT1    | 3.1 | 1.1E-15 | 3.0 | 9.5E-16 | 3.0 | 8.2 |
| ABCC8     | 3.1 | 6.0E-18 | 2.9 | 1.8E-17 | 3.0 | 8.1 |
| DPP6      | 3.4 | 1.6E-06 | 2.7 | 1.5E-04 | 3.0 | 8.0 |
| NR5A2     | 3.0 | 1.2E-16 | 3.1 | 1.1E-16 | 3.0 | 8.0 |
| ONECUT1   | 3.3 | 1.3E-17 | 2.7 | 9.9E-16 | 3.0 | 8.0 |
| DPF1      | 3.2 | 8.7E-19 | 2.8 | 2.2E-17 | 3.0 | 8.0 |
| FSD1      | 3.0 | 4.5E-18 | 3.0 | 4.7E-18 | 3.0 | 8.0 |
| TNFRSF10B | 2.8 | 2.5E-17 | 3.2 | 8.2E-19 | 3.0 | 8.0 |
| CHD5      | 2.7 | 1.1E-16 | 3.3 | 6.4E-19 | 3.0 | 8.0 |
| C1QL1     | 3.1 | 1.8E-11 | 2.9 | 1.2E-07 | 3.0 | 7.9 |
| DKKL1     | 3.2 | 1.3E-06 | 2.8 | 1.2E-06 | 3.0 | 7.9 |
| FANCA     | 2.8 | 1.6E-16 | 3.2 | 8.3E-18 | 3.0 | 7.9 |
| PCDH8     | 3.3 | 2.7E-09 | 2.6 | 2.6E-08 | 3.0 | 7.9 |
| MEGF11    | 3.0 | 3.5E-10 | 2.9 | 1.4E-07 | 3.0 | 7.9 |
| CNTNAP3   | 3.1 | 9.1E-17 | 2.8 | 1.6E-15 | 3.0 | 7.9 |
| CNTNAP3B  | 3.1 | 9.1E-17 | 2.8 | 1.6E-15 | 3.0 | 7.9 |
| CNTNAP3B  | 3.1 | 9.1E-17 | 2.8 | 1.6E-15 | 3.0 | 7.9 |
| PRM3      | 3.2 | 1.5E-15 | 2.7 | 2.9E-16 | 3.0 | 7.9 |
| SPP1      | 2.9 | 8.0E-18 | 3.0 | 3.1E-18 | 3.0 | 7.8 |
| GPC2      | 2.9 | 6.4E-18 | 3.0 | 4.2E-18 | 3.0 | 7.8 |
| GTPBP3    | 3.1 | 2.5E-18 | 2.9 | 1.2E-17 | 3.0 | 7.8 |
| KCNJ2     | 3.0 | 5.0E-18 | 2.9 | 6.9E-18 | 3.0 | 7.8 |
| BMP5      | 3.3 | 6.2E-18 | 2.6 | 2.6E-15 | 3.0 | 7.8 |
| ARHGEF26  | 3.0 | 2.1E-17 | 2.9 | 1.9E-17 | 3.0 | 7.8 |
| MAGEA2B   | 2.7 | 7.8E-07 | 3.2 | 4.8E-09 | 3.0 | 7.8 |
| VGF       | 2.8 | 1.6E-17 | 3.1 | 2.2E-18 | 3.0 | 7.8 |
| EMID1     | 2.9 | 2.3E-17 | 3.0 | 4.3E-18 | 3.0 | 7.7 |
| ZNF284    | 3.2 | 7.5E-07 | 2.7 | 1.4E-05 | 2.9 | 7.7 |
| CD36      | 3.0 | 4.1E-18 | 2.9 | 1.1E-17 | 2.9 | 7.7 |
| WIPF2     | 2.8 | 2.5E-17 | 3.1 | 1.9E-18 | 2.9 | 7.7 |
| PCSK1N    | 3.0 | 7.9E-18 | 2.9 | 1.2E-17 | 2.9 | 7.7 |
| PTPRJ     | 2.7 | 2.3E-07 | 3.1 | 6.4E-15 | 2.9 | 7.6 |
| SLC2A14   | 3.0 | 5.9E-17 | 2.8 | 3.6E-17 | 2.9 | 7.6 |
| SLC2A3    | 3.0 | 5.9E-17 | 2.8 | 3.6E-17 | 2.9 | 7.6 |

|           |     |         |     |         |     |     |
|-----------|-----|---------|-----|---------|-----|-----|
| HSPA4L    | 3.0 | 7.2E-17 | 2.8 | 1.8E-16 | 2.9 | 7.6 |
| LGALS12   | 2.5 | 1.1E-14 | 3.3 | 8.9E-19 | 2.9 | 7.5 |
| CTAG2     | 2.6 | 2.6E-14 | 3.2 | 8.3E-16 | 2.9 | 7.5 |
| MLLT11    | 3.0 | 5.8E-18 | 2.9 | 1.4E-17 | 2.9 | 7.5 |
| OR8J3     | 2.1 | 9.2E-11 | 3.7 | 3.1E-13 | 2.9 | 7.5 |
| KCNQ2     | 2.3 | 7.7E-09 | 3.5 | 1.5E-10 | 2.9 | 7.4 |
| C8orf47   | 2.8 | 1.8E-17 | 2.9 | 6.3E-18 | 2.9 | 7.4 |
| PCSK1     | 3.3 | 7.8E-06 | 2.5 | 1.7E-04 | 2.9 | 7.4 |
| PRB4      | 2.7 | 1.5E-16 | 3.1 | 1.9E-18 | 2.9 | 7.4 |
| ZFP64     | 2.9 | 7.8E-18 | 2.8 | 2.1E-17 | 2.9 | 7.3 |
| TP53I13   | 2.6 | 1.8E-16 | 3.1 | 1.7E-18 | 2.9 | 7.3 |
| KIFC2     | 2.6 | 1.5E-16 | 3.1 | 2.0E-18 | 2.9 | 7.3 |
| SRSF12    | 2.9 | 1.8E-17 | 2.8 | 4.9E-17 | 2.9 | 7.3 |
| ZFAND6    | 3.0 | 5.7E-18 | 2.8 | 3.2E-17 | 2.9 | 7.3 |
| MYBL1     | 2.3 | 2.5E-13 | 3.4 | 4.2E-16 | 2.9 | 7.3 |
| ZNF467    | 2.6 | 1.4E-12 | 3.1 | 2.4E-18 | 2.9 | 7.3 |
| DMBT1     | 3.1 | 3.8E-18 | 2.6 | 3.1E-16 | 2.9 | 7.2 |
| CHST6     | 3.0 | 9.6E-18 | 2.7 | 5.7E-17 | 2.9 | 7.2 |
| IL11      | 2.9 | 7.2E-17 | 2.7 | 2.0E-16 | 2.8 | 7.2 |
| GPAT2     | 3.0 | 4.5E-18 | 2.7 | 5.9E-17 | 2.8 | 7.2 |
| ZNF781    | 3.0 | 6.5E-17 | 2.7 | 8.3E-16 | 2.8 | 7.2 |
| LEAP2     | 2.9 | 9.1E-18 | 2.8 | 4.3E-17 | 2.8 | 7.2 |
| CAMP      | 2.9 | 3.4E-09 | 2.8 | 6.6E-10 | 2.8 | 7.2 |
| NPM3      | 2.8 | 1.7E-17 | 2.8 | 1.6E-17 | 2.8 | 7.1 |
| FAM118A   | 3.0 | 7.8E-18 | 2.7 | 2.4E-16 | 2.8 | 7.1 |
| ZNF560    | 3.2 | 3.5E-06 | 2.4 | 6.4E-04 | 2.8 | 7.1 |
| SGK494    | 2.8 | 5.5E-17 | 2.8 | 3.4E-17 | 2.8 | 7.1 |
| SYT4      | 2.6 | 3.0E-16 | 3.0 | 4.8E-18 | 2.8 | 7.1 |
| FOXD4     | 2.7 | 1.1E-16 | 2.9 | 1.4E-17 | 2.8 | 7.0 |
| FOXD4L1   | 2.7 | 1.1E-16 | 2.9 | 1.4E-17 | 2.8 | 7.0 |
| FOXD4L5   | 2.7 | 1.1E-16 | 2.9 | 1.4E-17 | 2.8 | 7.0 |
| LTK       | 2.9 | 1.6E-17 | 2.8 | 3.0E-17 | 2.8 | 7.0 |
| MMP10     | 2.8 | 6.2E-17 | 2.8 | 5.2E-17 | 2.8 | 7.0 |
| HCN3      | 2.8 | 1.7E-17 | 2.8 | 3.5E-17 | 2.8 | 7.0 |
| CLGN      | 2.9 | 1.9E-17 | 2.7 | 2.2E-16 | 2.8 | 7.0 |
| C6orf168  | 2.8 | 1.8E-16 | 2.8 | 1.5E-16 | 2.8 | 6.9 |
| CBFA2T3   | 2.7 | 1.2E-16 | 2.9 | 2.0E-17 | 2.8 | 6.9 |
| MARCH8    | 2.8 | 6.2E-17 | 2.8 | 5.2E-17 | 2.8 | 6.9 |
| SUN5      | 2.4 | 9.5E-11 | 3.2 | 4.8E-16 | 2.8 | 6.9 |
| PLCXD1    | 2.7 | 9.7E-17 | 2.9 | 1.4E-17 | 2.8 | 6.9 |
| RASGRP2   | 2.6 | 1.3E-16 | 2.9 | 7.2E-18 | 2.8 | 6.9 |
| ADORA3    | 2.5 | 1.4E-12 | 3.1 | 1.1E-07 | 2.8 | 6.9 |
| NRXN3     | 2.8 | 3.3E-17 | 2.7 | 6.2E-17 | 2.8 | 6.8 |
| HEYL      | 2.7 | 8.2E-17 | 2.9 | 1.3E-17 | 2.8 | 6.8 |
| C6orf165  | 2.9 | 1.2E-04 | 2.7 | 6.7E-05 | 2.8 | 6.8 |
| HIST2H2BE | 2.5 | 2.8E-13 | 3.1 | 2.8E-15 | 2.8 | 6.8 |
| C20orf7   | 2.6 | 9.6E-11 | 3.0 | 3.6E-16 | 2.8 | 6.8 |
| NHLH1     | 2.7 | 7.0E-17 | 2.8 | 2.8E-17 | 2.8 | 6.8 |
| ETV1      | 2.9 | 1.2E-11 | 2.6 | 1.5E-10 | 2.8 | 6.8 |
| ASGR2     | 2.4 | 1.8E-15 | 3.1 | 1.9E-18 | 2.8 | 6.8 |
| GATSL3    | 2.5 | 2.3E-15 | 3.0 | 4.0E-18 | 2.8 | 6.8 |
| NOV       | 2.8 | 2.3E-17 | 2.7 | 8.2E-17 | 2.8 | 6.8 |
| CHGA      | 2.7 | 4.7E-17 | 2.8 | 2.9E-17 | 2.8 | 6.7 |
| GABRE     | 2.9 | 1.3E-17 | 2.6 | 1.3E-16 | 2.7 | 6.7 |
| ZNF217    | 2.7 | 5.6E-17 | 2.8 | 2.6E-17 | 2.7 | 6.7 |
| HSPC072   | 2.6 | 1.4E-16 | 2.9 | 1.3E-17 | 2.7 | 6.7 |
| WIF1      | 2.6 | 1.4E-13 | 2.8 | 3.5E-13 | 2.7 | 6.7 |
| TNNT1     | 2.7 | 4.3E-17 | 2.7 | 4.3E-17 | 2.7 | 6.7 |
| SMC1B     | 2.5 | 3.8E-14 | 3.0 | 6.3E-16 | 2.7 | 6.7 |
| FGF9      | 2.6 | 1.8E-16 | 2.9 | 1.4E-17 | 2.7 | 6.6 |
| CACNA1A   | 2.8 | 3.9E-04 | 2.7 | 7.0E-05 | 2.7 | 6.6 |
| DCX       | 2.9 | 2.1E-14 | 2.6 | 1.8E-13 | 2.7 | 6.6 |

|           |     |         |     |         |     |     |
|-----------|-----|---------|-----|---------|-----|-----|
| FBXO15    | 2.8 | 4.7E-17 | 2.7 | 1.5E-16 | 2.7 | 6.6 |
| C6orf15   | 2.6 | 8.5E-16 | 2.9 | 2.7E-17 | 2.7 | 6.6 |
| POMC      | 2.7 | 9.8E-17 | 2.8 | 2.8E-17 | 2.7 | 6.6 |
| GABRA5    | 2.5 | 1.2E-14 | 2.9 | 4.0E-17 | 2.7 | 6.6 |
| DDX25     | 2.8 | 1.9E-04 | 2.6 | 1.7E-04 | 2.7 | 6.5 |
| ZP1       | 3.4 | 4.8E-15 | 2.1 | 4.6E-10 | 2.7 | 6.5 |
| SRD5A2    | 2.9 | 1.7E-04 | 2.5 | 2.8E-04 | 2.7 | 6.5 |
| ZNF238    | 2.6 | 8.2E-06 | 2.8 | 2.3E-05 | 2.7 | 6.5 |
| HIST1H3F  | 2.5 | 4.6E-14 | 2.9 | 5.3E-16 | 2.7 | 6.5 |
| HIST1H3H  | 2.5 | 4.6E-14 | 2.9 | 5.3E-16 | 2.7 | 6.5 |
| POM121L1P | 2.8 | 4.4E-11 | 2.6 | 6.6E-16 | 2.7 | 6.5 |
| MURC      | 2.4 | 3.4E-15 | 3.0 | 5.7E-18 | 2.7 | 6.5 |
| GPR110    | 2.9 | 1.1E-16 | 2.5 | 2.4E-15 | 2.7 | 6.5 |
| H2AFB2    | 2.6 | 2.6E-16 | 2.8 | 1.8E-17 | 2.7 | 6.5 |
| HOXC9     | 2.8 | 1.9E-17 | 2.6 | 2.5E-16 | 2.7 | 6.5 |
| DACH1     | 2.8 | 4.1E-17 | 2.6 | 4.3E-16 | 2.7 | 6.5 |
| C19orf30  | 2.6 | 1.1E-14 | 2.8 | 7.4E-16 | 2.7 | 6.4 |
| POU5F1    | 2.7 | 8.8E-17 | 2.7 | 6.6E-17 | 2.7 | 6.4 |
| POU5F1B   | 2.7 | 8.8E-17 | 2.7 | 6.6E-17 | 2.7 | 6.4 |
| MASP2     | 2.5 | 6.6E-14 | 2.9 | 2.2E-17 | 2.7 | 6.4 |
| KISS1R    | 2.7 | 8.8E-17 | 2.6 | 1.3E-16 | 2.7 | 6.4 |
| ZNF702P   | 3.1 | 4.6E-13 | 2.3 | 4.8E-13 | 2.7 | 6.4 |
| MIA       | 2.8 | 5.0E-17 | 2.6 | 5.1E-16 | 2.7 | 6.4 |
| CP        | 2.6 | 1.6E-16 | 2.7 | 6.4E-17 | 2.7 | 6.4 |
| BTBD17    | 2.4 | 4.9E-11 | 3.0 | 2.1E-16 | 2.7 | 6.4 |
| SPPL2B    | 2.5 | 3.2E-16 | 2.8 | 2.6E-17 | 2.7 | 6.4 |
| KIAA0319  | 2.0 | 1.5E-09 | 3.3 | 2.3E-12 | 2.7 | 6.3 |
| ANXA10    | 2.7 | 5.4E-13 | 2.6 | 4.5E-12 | 2.7 | 6.3 |
| POM121L9P | 2.8 | 4.4E-11 | 2.5 | 2.7E-14 | 2.6 | 6.3 |
| C11orf20  | 2.2 | 5.5E-14 | 3.1 | 3.3E-18 | 2.6 | 6.3 |
| CCL23     | 2.2 | 2.2E-11 | 3.1 | 3.3E-17 | 2.6 | 6.3 |
| NYX       | 2.6 | 4.2E-16 | 2.7 | 5.6E-17 | 2.6 | 6.2 |
| SMCR5     | 2.6 | 2.3E-16 | 2.7 | 6.5E-17 | 2.6 | 6.2 |
| PPM1N     | 2.8 | 4.0E-17 | 2.5 | 7.5E-16 | 2.6 | 6.2 |
| RUNDC3A   | 2.5 | 1.7E-15 | 2.7 | 8.9E-17 | 2.6 | 6.1 |
| ZNF671    | 2.7 | 4.9E-17 | 2.5 | 6.0E-16 | 2.6 | 6.1 |
| GDF2      | 2.3 | 4.7E-05 | 3.0 | 1.5E-10 | 2.6 | 6.1 |
| MAPK11    | 2.7 | 9.0E-17 | 2.5 | 3.1E-16 | 2.6 | 6.1 |
| CCDC151   | 2.5 | 9.2E-16 | 2.7 | 4.8E-17 | 2.6 | 6.1 |
| SLC10A4   | 2.6 | 5.1E-04 | 2.6 | 2.4E-04 | 2.6 | 6.1 |
| FZD8      | 2.6 | 1.8E-16 | 2.6 | 1.9E-16 | 2.6 | 6.0 |
| GNGT1     | 2.7 | 9.7E-04 | 2.5 | 1.4E-04 | 2.6 | 6.0 |
| PCDHB2    | 2.6 | 3.1E-16 | 2.6 | 2.9E-16 | 2.6 | 6.0 |
| VSIG4     | 2.7 | 4.1E-17 | 2.4 | 1.3E-15 | 2.6 | 6.0 |
| SLC38A4   | 2.6 | 1.9E-13 | 2.5 | 1.1E-12 | 2.6 | 6.0 |
| SELPLG    | 2.2 | 5.5E-14 | 3.0 | 5.5E-18 | 2.6 | 6.0 |
| CBY1      | 2.6 | 1.5E-16 | 2.5 | 4.4E-16 | 2.6 | 5.9 |
| ZNF329    | 2.5 | 8.8E-16 | 2.7 | 1.1E-16 | 2.6 | 5.9 |
| PLCD3     | 2.4 | 1.9E-15 | 2.7 | 4.3E-17 | 2.6 | 5.9 |
| CYP4A11   | 2.5 | 3.5E-11 | 2.6 | 4.2E-13 | 2.6 | 5.9 |
| ZNF558    | 2.6 | 1.2E-16 | 2.5 | 6.7E-16 | 2.6 | 5.9 |
| RIMKLA    | 3.0 | 8.8E-14 | 2.1 | 7.2E-12 | 2.6 | 5.9 |
| SLC27A1   | 2.4 | 1.6E-15 | 2.7 | 5.1E-17 | 2.6 | 5.9 |
| CSAD      | 2.7 | 1.9E-16 | 2.5 | 1.5E-15 | 2.6 | 5.9 |
| TSNARE1   | 2.1 | 2.2E-13 | 3.0 | 6.4E-18 | 2.6 | 5.9 |
| VCY       | 2.7 | 3.1E-16 | 2.4 | 2.6E-15 | 2.6 | 5.9 |
| VCY1B     | 2.7 | 3.1E-16 | 2.4 | 2.6E-15 | 2.6 | 5.9 |
| LRRRC16A  | 2.6 | 1.8E-16 | 2.5 | 4.2E-16 | 2.6 | 5.9 |
| HERC2     | 2.7 | 4.8E-14 | 2.4 | 1.9E-12 | 2.6 | 5.9 |
| HERC2P2   | 2.7 | 4.8E-14 | 2.4 | 1.9E-12 | 2.6 | 5.9 |
| OR3A2     | 2.8 | 1.3E-04 | 2.3 | 9.8E-04 | 2.6 | 5.9 |
| NEUROG1   | 2.3 | 2.3E-14 | 2.8 | 3.0E-17 | 2.6 | 5.9 |

|           |     |         |     |         |     |     |
|-----------|-----|---------|-----|---------|-----|-----|
| CLTCL1    | 2.4 | 1.3E-07 | 2.7 | 2.6E-05 | 2.6 | 5.9 |
| PDE4B     | 2.8 | 2.6E-17 | 2.3 | 8.8E-15 | 2.5 | 5.9 |
| FREM1     | 2.6 | 1.4E-16 | 2.5 | 8.9E-16 | 2.5 | 5.8 |
| NPBWR1    | 2.3 | 2.6E-13 | 2.8 | 8.4E-17 | 2.5 | 5.8 |
| REN       | 2.8 | 9.6E-17 | 2.3 | 2.3E-14 | 2.5 | 5.8 |
| POM121L8P | 2.8 | 4.4E-11 | 2.2 | 1.7E-10 | 2.5 | 5.8 |
| TMEM63B   | 2.5 | 6.1E-16 | 2.6 | 2.7E-16 | 2.5 | 5.8 |
| GP1BB     | 2.5 | 3.7E-16 | 2.5 | 3.3E-16 | 2.5 | 5.8 |
| SEPT5     | 2.5 | 3.7E-16 | 2.5 | 3.3E-16 | 2.5 | 5.8 |
| POU2F2    | 2.5 | 8.3E-16 | 2.6 | 1.6E-16 | 2.5 | 5.8 |
| MAP1B     | 2.6 | 7.2E-15 | 2.4 | 2.6E-13 | 2.5 | 5.8 |
| FIBCD1    | 2.4 | 4.9E-13 | 2.7 | 1.0E-15 | 2.5 | 5.8 |
| HNF1A     | 2.5 | 3.7E-16 | 2.5 | 5.1E-16 | 2.5 | 5.8 |
| ZFHX4     | 2.6 | 2.2E-13 | 2.4 | 2.2E-12 | 2.5 | 5.7 |
| ROBO1     | 2.6 | 7.6E-12 | 2.5 | 5.3E-11 | 2.5 | 5.7 |
| EFHC2     | 2.4 | 1.1E-06 | 2.6 | 4.4E-11 | 2.5 | 5.7 |
| TECRL     | 2.7 | 6.5E-07 | 2.4 | 5.9E-10 | 2.5 | 5.7 |
| FGF8      | 2.7 | 5.2E-09 | 2.3 | 2.0E-05 | 2.5 | 5.7 |
| CD163     | 2.6 | 2.0E-16 | 2.4 | 1.0E-15 | 2.5 | 5.7 |
| SLC46A2   | 3.0 | 5.1E-12 | 2.0 | 4.2E-07 | 2.5 | 5.7 |
| ELOVL4    | 2.1 | 1.1E-11 | 2.9 | 1.8E-15 | 2.5 | 5.7 |
| GRP       | 2.2 | 5.1E-08 | 2.8 | 1.3E-09 | 2.5 | 5.7 |
| EVX1      | 2.4 | 1.0E-15 | 2.6 | 2.8E-16 | 2.5 | 5.7 |
| CYP1B1    | 2.5 | 3.4E-16 | 2.4 | 1.0E-15 | 2.5 | 5.6 |
| SNX32     | 3.1 | 1.6E-14 | 1.9 | 2.4E-08 | 2.5 | 5.6 |
| GPR153    | 2.4 | 3.1E-15 | 2.6 | 1.8E-16 | 2.5 | 5.6 |
| TRIM49    | 2.5 | 4.5E-10 | 2.4 | 3.8E-11 | 2.5 | 5.6 |
| SLAIN1    | 2.6 | 6.8E-16 | 2.3 | 1.1E-14 | 2.5 | 5.6 |
| PHC1      | 2.7 | 6.4E-17 | 2.2 | 1.3E-14 | 2.5 | 5.6 |
| ST8SIA2   | 2.3 | 4.5E-14 | 2.6 | 2.1E-16 | 2.5 | 5.6 |
| ZNF404    | 2.6 | 2.1E-16 | 2.3 | 4.5E-15 | 2.5 | 5.5 |
| ACTR3B    | 2.4 | 2.1E-15 | 2.5 | 3.1E-16 | 2.5 | 5.5 |
| UTF1      | 2.1 | 6.0E-13 | 2.8 | 3.2E-17 | 2.5 | 5.5 |
| XAGE5     | 2.5 | 6.1E-15 | 2.4 | 5.4E-15 | 2.5 | 5.5 |
| EYA4      | 1.9 | 2.0E-05 | 3.0 | 4.1E-07 | 2.5 | 5.5 |
| ZFHX2     | 2.9 | 1.9E-17 | 2.0 | 2.2E-13 | 2.5 | 5.5 |
| GUCY1B2   | 2.5 | 7.2E-16 | 2.4 | 1.6E-15 | 2.5 | 5.5 |
| KRT3      | 2.3 | 1.2E-14 | 2.6 | 1.8E-16 | 2.5 | 5.5 |
| GNAZ      | 2.3 | 5.8E-14 | 2.6 | 2.7E-16 | 2.4 | 5.5 |
| UGT1A1    | 2.5 | 6.9E-16 | 2.4 | 2.5E-15 | 2.4 | 5.5 |
| UGT1A4    | 2.5 | 6.9E-16 | 2.4 | 2.5E-15 | 2.4 | 5.5 |
| UGT1A6    | 2.5 | 6.9E-16 | 2.4 | 2.5E-15 | 2.4 | 5.5 |
| UGT1A8    | 2.5 | 6.9E-16 | 2.4 | 2.5E-15 | 2.4 | 5.5 |
| NRXN2     | 2.5 | 1.1E-15 | 2.4 | 1.6E-15 | 2.4 | 5.4 |
| GIP       | 1.8 | 8.4E-06 | 3.1 | 3.8E-10 | 2.4 | 5.4 |
| PNOC      | 2.6 | 2.8E-14 | 2.3 | 3.6E-13 | 2.4 | 5.4 |
| GPR162    | 2.5 | 9.9E-16 | 2.4 | 1.6E-15 | 2.4 | 5.4 |
| SEC31B    | 2.4 | 1.5E-15 | 2.5 | 7.3E-16 | 2.4 | 5.4 |
| PDGFC     | 2.4 | 1.7E-15 | 2.5 | 6.5E-16 | 2.4 | 5.4 |
| KIAA1737  | 2.4 | 2.1E-15 | 2.5 | 5.7E-16 | 2.4 | 5.4 |
| ENKUR     | 2.7 | 1.7E-13 | 2.2 | 4.1E-11 | 2.4 | 5.4 |
| GRIN1     | 2.3 | 7.6E-15 | 2.6 | 2.1E-16 | 2.4 | 5.4 |
| HIST1H2BG | 2.4 | 2.0E-14 | 2.5 | 4.8E-15 | 2.4 | 5.4 |
| KIF1A     | 2.6 | 2.0E-15 | 2.3 | 1.6E-13 | 2.4 | 5.4 |
| HTR1A     | 2.5 | 4.7E-12 | 2.4 | 2.7E-13 | 2.4 | 5.4 |
| EYA1      | 2.4 | 2.4E-04 | 2.4 | 6.1E-04 | 2.4 | 5.4 |
| CDKAL1    | 2.3 | 9.4E-15 | 2.6 | 2.4E-16 | 2.4 | 5.3 |
| SFTPA2    | 2.0 | 2.7E-06 | 2.8 | 2.0E-13 | 2.4 | 5.3 |
| C6orf81   | 2.5 | 9.2E-16 | 2.3 | 3.9E-15 | 2.4 | 5.3 |
| OR2H1     | 2.3 | 1.0E-14 | 2.6 | 2.7E-16 | 2.4 | 5.3 |
| ACCN2     | 2.6 | 1.7E-16 | 2.2 | 2.0E-14 | 2.4 | 5.3 |
| ANKRD36B  | 2.3 | 5.2E-15 | 2.5 | 4.3E-16 | 2.4 | 5.3 |

|          |     |         |     |         |     |     |
|----------|-----|---------|-----|---------|-----|-----|
| DIRAS1   | 2.2 | 4.6E-14 | 2.7 | 8.0E-17 | 2.4 | 5.3 |
| TMOD4    | 2.6 | 4.0E-16 | 2.3 | 1.3E-14 | 2.4 | 5.3 |
| KCNH4    | 2.2 | 1.0E-13 | 2.6 | 1.4E-16 | 2.4 | 5.3 |
| GRIA2    | 2.8 | 1.6E-12 | 2.1 | 2.1E-09 | 2.4 | 5.3 |
| PAFAH1B3 | 2.3 | 4.9E-15 | 2.5 | 5.2E-16 | 2.4 | 5.3 |
| RASD2    | 2.1 | 4.4E-09 | 2.7 | 6.7E-15 | 2.4 | 5.3 |
| OR1J1    | 2.2 | 3.7E-06 | 2.6 | 1.4E-11 | 2.4 | 5.3 |
| GLI1     | 2.5 | 5.8E-16 | 2.3 | 5.1E-15 | 2.4 | 5.3 |
| HIBCH    | 2.5 | 5.5E-16 | 2.3 | 4.9E-15 | 2.4 | 5.3 |
| MGC45922 | 2.4 | 3.7E-15 | 2.4 | 1.1E-15 | 2.4 | 5.3 |
| FLT3LG   | 2.3 | 1.5E-13 | 2.5 | 8.8E-16 | 2.4 | 5.3 |
| C1orf216 | 2.4 | 2.5E-15 | 2.4 | 1.2E-15 | 2.4 | 5.3 |
| DUX1     | 2.1 | 4.7E-09 | 2.7 | 2.5E-11 | 2.4 | 5.3 |
| AGPAT4   | 2.4 | 3.1E-15 | 2.4 | 2.0E-15 | 2.4 | 5.2 |
| ARRDC4   | 2.7 | 2.9E-15 | 2.1 | 1.8E-12 | 2.4 | 5.2 |
| C19orf28 | 2.3 | 1.0E-14 | 2.5 | 5.1E-16 | 2.4 | 5.2 |
| TEK      | 2.3 | 8.9E-15 | 2.5 | 9.9E-16 | 2.4 | 5.2 |
| TTC9B    | 2.3 | 1.5E-12 | 2.5 | 2.0E-15 | 2.4 | 5.2 |
| GDF10    | 2.3 | 1.5E-12 | 2.4 | 4.3E-14 | 2.4 | 5.2 |
| NR2F1    | 2.3 | 3.2E-15 | 2.4 | 2.0E-15 | 2.4 | 5.2 |
| TMEM100  | 2.5 | 6.5E-16 | 2.2 | 1.4E-14 | 2.4 | 5.1 |
| ZNF205   | 2.2 | 1.4E-14 | 2.5 | 5.8E-16 | 2.4 | 5.1 |
| SLC34A3  | 2.1 | 1.3E-12 | 2.7 | 1.5E-16 | 2.4 | 5.1 |
| WBSCR17  | 2.6 | 9.6E-16 | 2.1 | 1.3E-13 | 2.4 | 5.1 |
| ANK3     | 2.3 | 4.4E-15 | 2.4 | 1.9E-15 | 2.4 | 5.1 |
| TFRC     | 2.3 | 4.3E-15 | 2.4 | 2.0E-15 | 2.4 | 5.1 |
| C15orf23 | 2.3 | 4.4E-15 | 2.4 | 2.0E-15 | 2.4 | 5.1 |
| DYRK1B   | 2.4 | 1.7E-15 | 2.3 | 5.4E-15 | 2.4 | 5.1 |
| FGFR3    | 2.8 | 5.3E-14 | 1.9 | 4.8E-11 | 2.3 | 5.1 |
| TTYH1    | 2.4 | 2.3E-15 | 2.3 | 7.0E-15 | 2.3 | 5.1 |
| GNRH2    | 2.3 | 9.1E-15 | 2.3 | 4.7E-15 | 2.3 | 5.1 |
| FGD1     | 2.3 | 9.9E-15 | 2.4 | 3.3E-15 | 2.3 | 5.1 |
| TLL7     | 2.0 | 7.8E-09 | 2.7 | 1.8E-10 | 2.3 | 5.1 |
| TSPAN10  | 2.3 | 7.9E-15 | 2.4 | 1.6E-15 | 2.3 | 5.1 |
| HIST1H3B | 2.4 | 2.8E-14 | 2.2 | 9.0E-14 | 2.3 | 5.1 |
| FKBP1B   | 2.2 | 1.9E-14 | 2.5 | 7.9E-16 | 2.3 | 5.1 |
| CAMK1D   | 2.3 | 1.1E-14 | 2.4 | 3.6E-15 | 2.3 | 5.0 |
| ANKFN1   | 1.8 | 1.2E-10 | 2.9 | 9.7E-17 | 2.3 | 5.0 |
| CECR2    | 2.3 | 2.3E-14 | 2.4 | 2.3E-15 | 2.3 | 5.0 |
| ATM      | 2.4 | 2.2E-15 | 2.3 | 1.2E-14 | 2.3 | 5.0 |
| FGF12    | 2.3 | 2.3E-14 | 2.4 | 5.1E-15 | 2.3 | 5.0 |
| BCL11A   | 2.2 | 3.1E-13 | 2.4 | 4.5E-14 | 2.3 | 5.0 |
| ZNF281   | 2.2 | 1.7E-14 | 2.4 | 1.1E-15 | 2.3 | 5.0 |
| ZNF300   | 2.5 | 8.6E-16 | 2.2 | 2.5E-14 | 2.3 | 5.0 |
| CCDC144A | 2.1 | 5.9E-07 | 2.5 | 5.1E-16 | 2.3 | 5.0 |
| FLJ22184 | 2.3 | 3.6E-15 | 2.3 | 5.7E-15 | 2.3 | 5.0 |
| LOC84856 | 2.6 | 5.9E-16 | 2.0 | 7.2E-13 | 2.3 | 5.0 |
| RNF125   | 2.3 | 1.1E-14 | 2.3 | 4.3E-15 | 2.3 | 5.0 |
| ASB14    | 2.2 | 7.1E-08 | 2.5 | 1.8E-07 | 2.3 | 5.0 |
| DNAH12   | 2.2 | 7.1E-08 | 2.5 | 1.8E-07 | 2.3 | 5.0 |
| TRPV1    | 2.3 | 1.1E-14 | 2.4 | 2.3E-15 | 2.3 | 5.0 |
| ZNF703   | 2.0 | 4.2E-13 | 2.6 | 1.5E-16 | 2.3 | 5.0 |
| SNCA     | 2.3 | 3.4E-15 | 2.3 | 6.9E-15 | 2.3 | 5.0 |
| TPO      | 1.8 | 1.8E-04 | 2.9 | 1.4E-06 | 2.3 | 5.0 |
| KCNJ4    | 2.3 | 7.8E-15 | 2.3 | 7.3E-15 | 2.3 | 5.0 |
| SLC39A7  | 2.2 | 1.3E-13 | 2.4 | 7.7E-15 | 2.3 | 5.0 |
| EXTL1    | 2.4 | 7.0E-14 | 2.2 | 2.9E-13 | 2.3 | 4.9 |
| RGS12    | 2.1 | 1.2E-13 | 2.5 | 4.9E-16 | 2.3 | 4.9 |
| GRAMD1C  | 2.4 | 1.9E-15 | 2.2 | 2.0E-14 | 2.3 | 4.9 |
| PRKX     | 2.4 | 1.5E-15 | 2.2 | 3.5E-14 | 2.3 | 4.9 |
| CA2      | 2.1 | 1.3E-13 | 2.5 | 4.8E-16 | 2.3 | 4.9 |
| RUNX2    | 1.8 | 8.2E-07 | 2.8 | 3.4E-12 | 2.3 | 4.9 |

|          |     |         |     |         |     |     |
|----------|-----|---------|-----|---------|-----|-----|
| HSPA2    | 2.2 | 1.7E-14 | 2.4 | 2.2E-15 | 2.3 | 4.9 |
| GH2      | 2.1 | 4.6E-12 | 2.5 | 6.6E-16 | 2.3 | 4.9 |
| UPK3B    | 2.0 | 8.1E-13 | 2.6 | 4.5E-16 | 2.3 | 4.9 |
| PRR24    | 2.1 | 1.5E-13 | 2.5 | 3.8E-16 | 2.3 | 4.9 |
| TNNI2    | 2.2 | 1.4E-12 | 2.4 | 1.3E-13 | 2.3 | 4.9 |
| ATP9A    | 2.1 | 6.9E-10 | 2.5 | 2.5E-11 | 2.3 | 4.9 |
| CCL11    | 2.4 | 8.0E-15 | 2.2 | 3.6E-14 | 2.3 | 4.9 |
| NEK8     | 2.3 | 2.5E-14 | 2.3 | 1.2E-14 | 2.3 | 4.9 |
| TRIM13   | 2.4 | 3.0E-15 | 2.2 | 1.5E-14 | 2.3 | 4.9 |
| FADS2    | 2.1 | 6.4E-14 | 2.5 | 8.6E-16 | 2.3 | 4.9 |
| RADIL    | 2.2 | 1.7E-14 | 2.3 | 4.8E-15 | 2.3 | 4.9 |
| CPA5     | 2.0 | 1.6E-10 | 2.5 | 1.2E-14 | 2.3 | 4.9 |
| LARP1B   | 2.3 | 5.3E-14 | 2.3 | 2.5E-14 | 2.3 | 4.8 |
| TRIM46   | 2.3 | 2.2E-12 | 2.3 | 1.5E-13 | 2.3 | 4.8 |
| PRMT8    | 2.1 | 2.7E-13 | 2.5 | 7.7E-16 | 2.3 | 4.8 |
| CEP170   | 2.3 | 1.7E-13 | 2.3 | 1.0E-13 | 2.3 | 4.8 |
| CEP170L  | 2.3 | 1.7E-13 | 2.3 | 1.0E-13 | 2.3 | 4.8 |
| HEY1     | 2.4 | 3.2E-14 | 2.2 | 2.0E-13 | 2.3 | 4.8 |
| MS4A4A   | 2.3 | 3.3E-15 | 2.2 | 3.0E-14 | 2.3 | 4.8 |
| ERF      | 2.7 | 3.0E-16 | 1.8 | 1.0E-11 | 2.3 | 4.8 |
| UBFD1    | 2.2 | 2.3E-14 | 2.3 | 4.9E-15 | 2.3 | 4.8 |
| NEO1     | 2.4 | 2.9E-15 | 2.1 | 4.5E-14 | 2.3 | 4.8 |
| BARX1    | 2.1 | 9.6E-10 | 2.4 | 5.7E-11 | 2.3 | 4.8 |
| MYBPC2   | 1.9 | 1.4E-09 | 2.6 | 4.8E-15 | 2.2 | 4.8 |
| CACNB3   | 2.1 | 2.1E-13 | 2.4 | 2.4E-15 | 2.2 | 4.7 |
| NACAD    | 2.3 | 1.2E-14 | 2.2 | 2.0E-14 | 2.2 | 4.7 |
| CNIH     | 2.1 | 5.2E-14 | 2.4 | 2.9E-15 | 2.2 | 4.7 |
| PLD1     | 2.1 | 8.5E-14 | 2.4 | 2.2E-15 | 2.2 | 4.7 |
| SRGAP3   | 2.0 | 2.5E-13 | 2.4 | 1.1E-15 | 2.2 | 4.7 |
| TRAK1    | 2.1 | 4.3E-14 | 2.3 | 4.3E-15 | 2.2 | 4.7 |
| BAI1     | 2.3 | 3.2E-14 | 2.2 | 4.0E-14 | 2.2 | 4.7 |
| ZNF177   | 2.2 | 3.8E-14 | 2.3 | 5.6E-15 | 2.2 | 4.7 |
| FAM187B  | 1.8 | 6.7E-09 | 2.6 | 1.0E-14 | 2.2 | 4.7 |
| LILRB1   | 2.1 | 8.4E-14 | 2.4 | 3.2E-15 | 2.2 | 4.7 |
| LILRB4   | 2.1 | 8.4E-14 | 2.4 | 3.2E-15 | 2.2 | 4.7 |
| SPEF1    | 2.0 | 1.4E-12 | 2.5 | 1.2E-15 | 2.2 | 4.7 |
| SNTG2    | 2.1 | 1.7E-11 | 2.3 | 2.8E-12 | 2.2 | 4.7 |
| TCAP     | 2.2 | 1.7E-14 | 2.2 | 1.7E-14 | 2.2 | 4.7 |
| TGM7     | 2.1 | 1.8E-10 | 2.3 | 1.5E-12 | 2.2 | 4.7 |
| ADAMTS14 | 2.5 | 2.9E-12 | 1.9 | 1.9E-10 | 2.2 | 4.7 |
| OR2T8    | 1.7 | 4.0E-08 | 2.7 | 2.3E-15 | 2.2 | 4.7 |
| CA3      | 2.8 | 5.5E-14 | 1.7 | 4.5E-09 | 2.2 | 4.7 |
| SPSB4    | 2.0 | 2.6E-13 | 2.4 | 1.5E-15 | 2.2 | 4.6 |
| GABRA3   | 2.0 | 1.8E-09 | 2.4 | 2.3E-13 | 2.2 | 4.6 |
| HSD17B2  | 2.4 | 1.2E-15 | 2.0 | 3.5E-13 | 2.2 | 4.6 |
| NTNG1    | 2.5 | 2.8E-04 | 2.0 | 9.8E-04 | 2.2 | 4.6 |
| KCNH2    | 2.4 | 2.0E-15 | 2.0 | 2.3E-13 | 2.2 | 4.6 |
| TP53BP1  | 2.2 | 2.3E-14 | 2.2 | 1.5E-14 | 2.2 | 4.6 |
| KIR2DL1  | 2.2 | 3.9E-08 | 2.2 | 5.3E-10 | 2.2 | 4.6 |
| KIR2DL2  | 2.2 | 3.9E-08 | 2.2 | 5.3E-10 | 2.2 | 4.6 |
| KIR2DL3  | 2.2 | 3.9E-08 | 2.2 | 5.3E-10 | 2.2 | 4.6 |
| PITPNC1  | 2.2 | 2.5E-14 | 2.2 | 2.0E-14 | 2.2 | 4.6 |
| CACNA1E  | 2.0 | 2.5E-12 | 2.4 | 1.6E-15 | 2.2 | 4.6 |
| B4GALNT4 | 2.3 | 9.1E-15 | 2.1 | 4.8E-14 | 2.2 | 4.6 |
| RABEP1   | 2.2 | 2.2E-14 | 2.2 | 1.9E-14 | 2.2 | 4.6 |
| CHRNA5   | 1.9 | 4.8E-10 | 2.6 | 4.3E-14 | 2.2 | 4.6 |
| CPT1B    | 2.2 | 1.6E-14 | 2.2 | 2.6E-14 | 2.2 | 4.6 |
| RAB24    | 2.2 | 2.2E-14 | 2.2 | 2.2E-14 | 2.2 | 4.6 |
| HIPK2    | 1.9 | 2.1E-09 | 2.5 | 4.9E-15 | 2.2 | 4.6 |
| MKRN3    | 1.7 | 2.5E-10 | 2.7 | 2.7E-15 | 2.2 | 4.6 |
| C20orf96 | 2.2 | 4.1E-13 | 2.2 | 1.0E-13 | 2.2 | 4.6 |
| SF3A2    | 2.0 | 2.6E-13 | 2.4 | 2.2E-15 | 2.2 | 4.6 |

|           |     |         |     |         |     |     |
|-----------|-----|---------|-----|---------|-----|-----|
| MYBPH     | 2.5 | 1.8E-11 | 1.9 | 4.4E-08 | 2.2 | 4.6 |
| L3MBTL1   | 2.3 | 4.2E-14 | 2.1 | 1.3E-13 | 2.2 | 4.6 |
| RAB33A    | 2.2 | 1.7E-14 | 2.2 | 4.4E-14 | 2.2 | 4.6 |
| ASB16     | 2.0 | 5.0E-10 | 2.4 | 1.4E-14 | 2.2 | 4.6 |
| LY6H      | 1.8 | 7.4E-06 | 2.6 | 5.4E-07 | 2.2 | 4.6 |
| TMEM38A   | 2.3 | 6.0E-14 | 2.1 | 2.0E-13 | 2.2 | 4.6 |
| SAC3D1    | 2.1 | 1.7E-13 | 2.3 | 4.7E-15 | 2.2 | 4.6 |
| PHYHIPL   | 1.9 | 3.3E-12 | 2.4 | 2.0E-15 | 2.2 | 4.6 |
| CCIN      | 2.3 | 5.0E-14 | 2.1 | 2.5E-13 | 2.2 | 4.6 |
| TMEM88    | 2.1 | 2.0E-13 | 2.3 | 5.0E-15 | 2.2 | 4.6 |
| DUX4      | 2.0 | 6.8E-13 | 2.4 | 1.4E-15 | 2.2 | 4.5 |
| PLA2G7    | 2.4 | 1.4E-15 | 1.9 | 8.6E-13 | 2.2 | 4.5 |
| KLF16     | 2.0 | 5.2E-13 | 2.4 | 2.1E-15 | 2.2 | 4.5 |
| C21orf88  | 2.1 | 1.4E-13 | 2.3 | 6.6E-15 | 2.2 | 4.5 |
| TAF5L     | 2.3 | 1.0E-14 | 2.1 | 1.1E-13 | 2.2 | 4.5 |
| P4HA1     | 2.1 | 1.4E-13 | 2.3 | 6.4E-15 | 2.2 | 4.5 |
| KIF12     | 1.9 | 1.2E-11 | 2.5 | 1.4E-15 | 2.2 | 4.5 |
| PARP10    | 2.0 | 2.9E-13 | 2.3 | 3.7E-15 | 2.2 | 4.5 |
| HIST1H2BO | 2.2 | 3.2E-14 | 2.2 | 2.9E-14 | 2.2 | 4.5 |
| ZNF865    | 1.9 | 4.0E-12 | 2.4 | 3.0E-15 | 2.2 | 4.5 |
| ZNF579    | 2.2 | 3.9E-14 | 2.2 | 2.5E-14 | 2.2 | 4.5 |
| OR10H2    | 2.0 | 6.3E-13 | 2.3 | 3.6E-15 | 2.2 | 4.5 |
| FANCL     | 2.3 | 1.1E-14 | 2.1 | 1.2E-13 | 2.2 | 4.5 |
| DOC2A     | 2.2 | 1.1E-12 | 2.2 | 1.6E-12 | 2.2 | 4.5 |
| HAPLN4    | 2.2 | 3.7E-13 | 2.2 | 5.6E-14 | 2.2 | 4.5 |
| TNNI3     | 2.3 | 4.7E-15 | 2.0 | 3.3E-13 | 2.2 | 4.5 |
| ERP27     | 2.4 | 1.1E-14 | 2.0 | 1.7E-12 | 2.2 | 4.5 |
| H1FO      | 2.1 | 1.6E-13 | 2.3 | 9.7E-15 | 2.2 | 4.5 |
| HIST1H2BI | 2.1 | 1.0E-13 | 2.2 | 1.5E-14 | 2.2 | 4.5 |
| HIST1H2BF | 2.1 | 9.9E-14 | 2.2 | 1.5E-14 | 2.2 | 4.5 |
| DCAF4     | 2.2 | 1.2E-14 | 2.1 | 1.4E-13 | 2.2 | 4.4 |
| UTS2R     | 2.0 | 2.2E-13 | 2.3 | 9.2E-15 | 2.1 | 4.4 |
| KLF8      | 2.2 | 2.7E-14 | 2.1 | 9.8E-14 | 2.1 | 4.4 |
| GLT1D1    | 2.6 | 3.3E-10 | 1.7 | 1.0E-06 | 2.1 | 4.4 |
| DRD5      | 2.7 | 8.9E-12 | 1.6 | 2.3E-07 | 2.1 | 4.4 |
| HPGD      | 2.2 | 1.3E-13 | 2.1 | 3.2E-13 | 2.1 | 4.4 |
| COX6A2    | 2.0 | 4.6E-13 | 2.3 | 5.3E-15 | 2.1 | 4.4 |
| FOXB1     | 2.2 | 2.0E-10 | 2.1 | 5.8E-13 | 2.1 | 4.4 |
| MRI1      | 2.1 | 1.4E-13 | 2.2 | 1.6E-14 | 2.1 | 4.4 |
| NR2E1     | 2.0 | 1.3E-09 | 2.2 | 6.7E-10 | 2.1 | 4.4 |
| IRF7      | 2.0 | 6.0E-13 | 2.3 | 5.1E-15 | 2.1 | 4.4 |
| MATN3     | 2.0 | 2.0E-09 | 2.3 | 5.8E-12 | 2.1 | 4.4 |
| CDH24     | 2.0 | 1.5E-11 | 2.3 | 8.8E-15 | 2.1 | 4.4 |
| FER1L4    | 2.1 | 5.3E-14 | 2.1 | 5.0E-14 | 2.1 | 4.4 |
| C21orf81  | 2.2 | 2.6E-14 | 2.0 | 2.5E-13 | 2.1 | 4.4 |
| CGB1      | 1.8 | 2.2E-07 | 2.5 | 1.5E-13 | 2.1 | 4.4 |
| HIST1H2BH | 2.1 | 6.7E-14 | 2.1 | 4.3E-14 | 2.1 | 4.4 |
| APLP1     | 2.5 | 7.0E-14 | 1.8 | 8.1E-10 | 2.1 | 4.4 |
| KMO       | 1.9 | 4.5E-11 | 2.4 | 4.6E-15 | 2.1 | 4.4 |
| NPHS1     | 2.3 | 2.8E-10 | 1.9 | 5.3E-07 | 2.1 | 4.4 |
| GNRH1     | 2.3 | 1.6E-14 | 2.0 | 8.5E-13 | 2.1 | 4.4 |
| UNG       | 2.1 | 5.4E-14 | 2.1 | 5.9E-14 | 2.1 | 4.4 |
| HES7      | 1.9 | 7.7E-13 | 2.3 | 5.2E-15 | 2.1 | 4.4 |
| SRRM2     | 2.1 | 6.1E-14 | 2.1 | 6.2E-14 | 2.1 | 4.4 |
| PCDHB5    | 2.3 | 4.4E-15 | 1.9 | 1.7E-12 | 2.1 | 4.4 |
| LCE1D     | 2.1 | 8.4E-14 | 2.1 | 5.3E-14 | 2.1 | 4.3 |
| PTH2      | 1.9 | 5.1E-11 | 2.3 | 1.3E-14 | 2.1 | 4.3 |
| CELF1     | 2.2 | 1.3E-14 | 2.0 | 3.0E-10 | 2.1 | 4.3 |
| C6orf105  | 2.2 | 3.2E-09 | 2.0 | 4.1E-08 | 2.1 | 4.3 |
| HMX1      | 1.7 | 7.9E-08 | 2.5 | 1.8E-10 | 2.1 | 4.3 |
| PPP1R14C  | 2.2 | 5.9E-14 | 2.0 | 7.4E-13 | 2.1 | 4.3 |
| MTHFD2    | 2.2 | 3.3E-14 | 2.1 | 1.7E-13 | 2.1 | 4.3 |

|           |     |         |     |         |     |     |
|-----------|-----|---------|-----|---------|-----|-----|
| KATNAL1   | 2.1 | 9.3E-14 | 2.1 | 1.3E-13 | 2.1 | 4.3 |
| VPS13A    | 2.0 | 2.2E-13 | 2.2 | 3.5E-14 | 2.1 | 4.3 |
| ZNF608    | 2.2 | 2.0E-13 | 2.0 | 5.8E-13 | 2.1 | 4.3 |
| PBX2      | 2.2 | 7.3E-14 | 2.0 | 2.4E-13 | 2.1 | 4.3 |
| FLJ32063  | 2.2 | 1.8E-08 | 2.0 | 4.6E-07 | 2.1 | 4.3 |
| C1orf175  | 1.8 | 5.0E-11 | 2.4 | 5.5E-15 | 2.1 | 4.3 |
| TTC4      | 1.8 | 5.0E-11 | 2.4 | 5.5E-15 | 2.1 | 4.3 |
| OR11A1    | 2.0 | 8.5E-12 | 2.2 | 9.6E-14 | 2.1 | 4.3 |
| CDH2      | 2.2 | 3.3E-14 | 2.0 | 3.0E-13 | 2.1 | 4.3 |
| GATA3     | 2.6 | 1.6E-12 | 1.6 | 1.8E-07 | 2.1 | 4.3 |
| SYNPO2L   | 2.0 | 2.3E-13 | 2.1 | 4.7E-14 | 2.1 | 4.3 |
| KPNA2     | 2.2 | 2.2E-14 | 2.0 | 4.6E-13 | 2.1 | 4.3 |
| LPHN1     | 1.8 | 1.6E-11 | 2.4 | 1.4E-15 | 2.1 | 4.3 |
| ACRC      | 2.1 | 1.3E-13 | 2.0 | 2.5E-13 | 2.1 | 4.2 |
| NFAT5     | 2.3 | 9.1E-15 | 1.9 | 2.4E-12 | 2.1 | 4.2 |
| CPNE7     | 2.2 | 1.4E-14 | 1.9 | 1.1E-12 | 2.1 | 4.2 |
| HDGFRP3   | 2.2 | 1.3E-14 | 1.9 | 1.2E-12 | 2.1 | 4.2 |
| CBL       | 2.1 | 3.6E-13 | 2.1 | 3.1E-13 | 2.1 | 4.2 |
| ABCG1     | 2.1 | 9.3E-14 | 2.0 | 2.9E-13 | 2.1 | 4.2 |
| BSN       | 2.0 | 1.0E-11 | 2.1 | 1.7E-12 | 2.1 | 4.2 |
| ODZ3      | 2.2 | 9.0E-14 | 1.9 | 7.5E-12 | 2.1 | 4.2 |
| DLGAP3    | 1.9 | 7.5E-13 | 2.2 | 2.3E-14 | 2.1 | 4.2 |
| LOC80154  | 2.2 | 3.5E-14 | 2.0 | 4.9E-13 | 2.1 | 4.2 |
| HNRNPH1   | 1.9 | 7.3E-13 | 2.2 | 2.4E-14 | 2.1 | 4.2 |
| ADSSL1    | 2.0 | 9.0E-13 | 2.1 | 9.3E-14 | 2.1 | 4.2 |
| BTNL2     | 2.0 | 5.6E-13 | 2.1 | 1.1E-13 | 2.1 | 4.2 |
| HIST1H1C  | 2.1 | 1.3E-13 | 2.1 | 1.6E-13 | 2.1 | 4.2 |
| INO80D    | 1.7 | 9.4E-10 | 2.4 | 4.0E-15 | 2.1 | 4.2 |
| MEGF8     | 2.1 | 2.6E-13 | 2.1 | 1.9E-13 | 2.1 | 4.2 |
| HIST1H2BD | 2.0 | 2.7E-13 | 2.1 | 8.8E-14 | 2.1 | 4.2 |
| ELFN2     | 2.0 | 3.6E-11 | 2.2 | 2.8E-13 | 2.1 | 4.2 |
| HIST1H2BE | 2.0 | 4.3E-13 | 2.1 | 5.9E-14 | 2.1 | 4.2 |
| CYP2E1    | 2.2 | 7.6E-13 | 1.9 | 1.3E-11 | 2.1 | 4.2 |
| RTBDN     | 2.0 | 1.9E-12 | 2.2 | 5.1E-14 | 2.1 | 4.1 |
| ATP2A1    | 2.0 | 6.0E-13 | 2.1 | 9.5E-14 | 2.1 | 4.1 |
| ATP2A2    | 2.0 | 6.0E-13 | 2.1 | 9.5E-14 | 2.1 | 4.1 |
| GPR157    | 2.0 | 7.7E-13 | 2.1 | 5.0E-14 | 2.0 | 4.1 |
| BBC3      | 2.1 | 1.0E-13 | 2.0 | 2.7E-13 | 2.0 | 4.1 |
| HRASLS5   | 1.9 | 1.5E-12 | 2.2 | 4.2E-14 | 2.0 | 4.1 |
| HGFAC     | 1.9 | 9.7E-07 | 2.2 | 4.8E-10 | 2.0 | 4.1 |
| KPTN      | 2.0 | 3.7E-13 | 2.1 | 9.4E-14 | 2.0 | 4.1 |
| ZNF589    | 2.2 | 2.4E-14 | 1.9 | 1.9E-12 | 2.0 | 4.1 |
| AZU1      | 2.1 | 8.0E-08 | 2.0 | 3.8E-09 | 2.0 | 4.1 |
| KCNN1     | 1.6 | 2.6E-07 | 2.5 | 1.8E-13 | 2.0 | 4.1 |
| ZNF711    | 2.1 | 5.9E-14 | 1.9 | 1.1E-12 | 2.0 | 4.1 |
| NEBL      | 2.1 | 7.7E-14 | 2.0 | 8.2E-13 | 2.0 | 4.1 |
| SPIB      | 2.0 | 2.3E-12 | 2.1 | 9.8E-14 | 2.0 | 4.1 |
| ANKRD13B  | 2.1 | 4.9E-13 | 2.0 | 2.9E-12 | 2.0 | 4.1 |
| STC1      | 2.3 | 6.5E-13 | 1.8 | 3.7E-10 | 2.0 | 4.1 |
| RAPGEF1   | 1.9 | 1.1E-11 | 2.2 | 8.0E-14 | 2.0 | 4.1 |
| ZNF114    | 1.8 | 5.5E-08 | 2.3 | 2.0E-09 | 2.0 | 4.1 |
| APBA2     | 2.1 | 5.6E-11 | 2.0 | 1.9E-11 | 2.0 | 4.1 |
| CACNB4    | 1.8 | 8.3E-05 | 2.3 | 5.4E-06 | 2.0 | 4.1 |
| TMEM145   | 1.8 | 8.4E-12 | 2.3 | 9.2E-15 | 2.0 | 4.1 |
| FBNP1L    | 1.8 | 1.5E-11 | 2.3 | 1.0E-08 | 2.0 | 4.1 |
| DNAJB5    | 2.2 | 2.0E-14 | 1.8 | 3.8E-12 | 2.0 | 4.1 |
| PANX2     | 1.8 | 2.0E-10 | 2.2 | 7.1E-14 | 2.0 | 4.1 |
| HIST3H2BB | 1.9 | 7.5E-13 | 2.1 | 8.8E-14 | 2.0 | 4.1 |
| NPTX2     | 2.0 | 2.2E-13 | 2.0 | 3.0E-13 | 2.0 | 4.1 |
| ICAM5     | 2.0 | 4.1E-12 | 2.1 | 3.7E-13 | 2.0 | 4.1 |
| HIST1H2AC | 2.0 | 4.5E-13 | 2.1 | 1.5E-13 | 2.0 | 4.1 |
| LOC497190 | 2.0 | 1.2E-12 | 2.0 | 4.1E-13 | 2.0 | 4.1 |

|            |     |         |     |         |     |     |
|------------|-----|---------|-----|---------|-----|-----|
| ITGA7      | 2.0 | 2.0E-13 | 2.0 | 3.5E-13 | 2.0 | 4.1 |
| C16orf55   | 2.1 | 2.3E-13 | 2.0 | 8.7E-13 | 2.0 | 4.1 |
| CALCR      | 2.1 | 3.9E-06 | 1.9 | 1.5E-04 | 2.0 | 4.0 |
| CETN1      | 1.9 | 3.0E-12 | 2.2 | 3.4E-14 | 2.0 | 4.0 |
| CNTNAP1    | 1.9 | 3.0E-12 | 2.2 | 4.1E-14 | 2.0 | 4.0 |
| NOTCH3     | 1.7 | 2.6E-11 | 2.3 | 5.4E-15 | 2.0 | 4.0 |
| SH2B2      | 1.8 | 1.6E-10 | 2.2 | 2.1E-14 | 2.0 | 4.0 |
| CPN2       | 1.9 | 1.4E-08 | 2.1 | 2.0E-12 | 2.0 | 4.0 |
| BSND       | 1.7 | 1.4E-04 | 2.3 | 6.3E-09 | 2.0 | 4.0 |
| YBX2       | 2.0 | 2.0E-13 | 2.0 | 5.6E-13 | 2.0 | 4.0 |
| SPEG       | 1.9 | 1.7E-11 | 2.1 | 8.7E-14 | 2.0 | 4.0 |
| TXNDC3     | 2.3 | 1.1E-04 | 1.7 | 6.0E-04 | 2.0 | 4.0 |
| RPS6KA6    | 2.4 | 3.5E-05 | 1.6 | 6.8E-04 | 2.0 | 4.0 |
| SLC7A14    | 1.3 | 4.7E-06 | 2.7 | 1.1E-09 | 2.0 | 4.0 |
| GUCY1A2    | 1.9 | 7.5E-09 | 2.1 | 1.3E-10 | 2.0 | 4.0 |
| MYOM1      | 2.0 | 3.8E-13 | 2.0 | 5.1E-13 | 2.0 | 4.0 |
| ZNF562     | 2.0 | 5.4E-13 | 2.0 | 2.5E-13 | 2.0 | 4.0 |
| GABRD      | 2.1 | 6.6E-07 | 1.9 | 4.6E-12 | 2.0 | 4.0 |
| ATF5       | 2.0 | 3.2E-13 | 2.0 | 5.8E-13 | 2.0 | 4.0 |
| MAP3K12    | 1.9 | 1.9E-12 | 2.1 | 1.2E-13 | 2.0 | 4.0 |
| SRC        | 2.1 | 1.2E-13 | 1.9 | 2.1E-12 | 2.0 | 4.0 |
| CACNG6     | 1.9 | 2.2E-12 | 2.1 | 9.7E-14 | 2.0 | 4.0 |
| IPO7       | 2.1 | 3.0E-13 | 1.9 | 5.9E-12 | 2.0 | 3.9 |
| AFG3L1     | 2.2 | 4.2E-14 | 1.8 | 6.7E-12 | 2.0 | 3.9 |
| AKR1E2     | 2.0 | 7.0E-12 | 1.9 | 2.0E-11 | 2.0 | 3.9 |
| WDR41      | 2.0 | 2.2E-13 | 1.9 | 1.4E-12 | 2.0 | 3.9 |
| HIST2H2AA3 | 2.0 | 2.0E-13 | 1.9 | 1.3E-12 | 2.0 | 3.9 |
| HIST2H2AA4 | 2.0 | 2.0E-13 | 1.9 | 1.3E-12 | 2.0 | 3.9 |
| MSR1       | 2.1 | 2.6E-09 | 1.8 | 6.3E-06 | 2.0 | 3.9 |
| ASTN2      | 2.0 | 7.3E-13 | 2.0 | 1.0E-12 | 2.0 | 3.9 |
| USP6       | 1.7 | 1.9E-11 | 2.2 | 2.6E-14 | 2.0 | 3.9 |
| UCN3       | 1.7 | 1.9E-09 | 2.2 | 6.5E-14 | 2.0 | 3.9 |
| MIER2      | 1.7 | 4.3E-11 | 2.2 | 1.3E-14 | 2.0 | 3.9 |
| ITGA2B     | 1.8 | 5.0E-08 | 2.1 | 9.8E-08 | 2.0 | 3.9 |
| HIST1H2BN  | 1.9 | 2.0E-12 | 2.0 | 1.9E-13 | 2.0 | 3.9 |
| STK17A     | 1.7 | 3.9E-11 | 2.2 | 3.2E-14 | 2.0 | 3.9 |
| KLK15      | 1.8 | 1.1E-04 | 2.1 | 8.6E-08 | 2.0 | 3.9 |
| GATA4      | 1.8 | 1.8E-11 | 2.2 | 4.1E-14 | 2.0 | 3.9 |
| VCAN       | 2.1 | 1.7E-13 | 1.9 | 2.6E-12 | 2.0 | 3.9 |
| CUX2       | 2.2 | 4.0E-08 | 1.7 | 1.1E-08 | 2.0 | 3.9 |
| NRBP2      | 2.0 | 6.6E-13 | 2.0 | 7.0E-13 | 2.0 | 3.9 |
| CDKN2AIPNL | 2.0 | 5.6E-13 | 1.9 | 9.1E-13 | 2.0 | 3.9 |
| SLC13A5    | 1.7 | 1.7E-09 | 2.2 | 1.2E-13 | 2.0 | 3.9 |
| MAPT       | 1.9 | 1.2E-07 | 2.0 | 6.3E-07 | 2.0 | 3.9 |
| MT1F       | 1.7 | 9.2E-11 | 2.2 | 1.3E-14 | 2.0 | 3.9 |
| SCN8A      | 1.4 | 2.0E-04 | 2.5 | 1.5E-05 | 2.0 | 3.9 |
| HIST1H2AK  | 1.9 | 1.0E-12 | 2.0 | 5.4E-13 | 2.0 | 3.9 |
| C15orf28   | 1.9 | 9.5E-13 | 2.0 | 5.1E-13 | 2.0 | 3.9 |
| BAX        | 2.0 | 3.6E-13 | 1.9 | 1.4E-12 | 2.0 | 3.9 |
| GLI3       | 2.0 | 4.6E-13 | 1.9 | 1.2E-12 | 2.0 | 3.9 |
| CDH7       | 2.5 | 4.8E-09 | 1.4 | 9.8E-05 | 2.0 | 3.9 |
| ZNF718     | 2.3 | 1.1E-05 | 1.6 | 2.9E-04 | 1.9 | 3.9 |
| RAC3       | 2.0 | 4.1E-13 | 1.9 | 1.9E-12 | 1.9 | 3.8 |
| KCNJ15     | 2.0 | 1.3E-10 | 1.8 | 5.4E-10 | 1.9 | 3.8 |
| ZNF135     | 1.9 | 1.6E-12 | 2.0 | 7.0E-13 | 1.9 | 3.8 |
| NUAK1      | 2.0 | 2.6E-13 | 1.9 | 3.3E-12 | 1.9 | 3.8 |
| SMR3A      | 1.7 | 1.1E-08 | 2.2 | 5.7E-13 | 1.9 | 3.8 |
| HYDIN      | 2.3 | 5.4E-05 | 1.6 | 2.1E-06 | 1.9 | 3.8 |
| HYDIN2     | 2.3 | 5.4E-05 | 1.6 | 2.1E-06 | 1.9 | 3.8 |
| TMEM44     | 2.0 | 3.1E-13 | 1.9 | 3.1E-12 | 1.9 | 3.8 |
| COL23A1    | 2.2 | 1.9E-10 | 1.6 | 4.2E-09 | 1.9 | 3.8 |
| KTN1       | 2.1 | 1.6E-13 | 1.8 | 7.4E-12 | 1.9 | 3.8 |

|           |     |         |     |         |     |     |
|-----------|-----|---------|-----|---------|-----|-----|
| C17orf99  | 1.7 | 6.3E-11 | 2.1 | 5.3E-14 | 1.9 | 3.8 |
| ASGR1     | 1.9 | 1.9E-12 | 2.0 | 6.0E-13 | 1.9 | 3.8 |
| APOL4     | 1.9 | 2.8E-12 | 2.0 | 4.2E-13 | 1.9 | 3.8 |
| KREMEN2   | 2.0 | 4.9E-13 | 1.9 | 2.6E-12 | 1.9 | 3.8 |
| SEMA4F    | 2.0 | 5.0E-13 | 1.8 | 5.3E-12 | 1.9 | 3.8 |
| DEFA3     | 2.0 | 1.5E-11 | 1.9 | 7.2E-11 | 1.9 | 3.8 |
| NPDC1     | 1.8 | 5.9E-12 | 2.0 | 2.4E-13 | 1.9 | 3.8 |
| KLHL25    | 1.5 | 5.3E-09 | 2.3 | 1.4E-14 | 1.9 | 3.8 |
| NIN       | 2.0 | 1.8E-12 | 1.8 | 2.3E-11 | 1.9 | 3.8 |
| PPP1R3F   | 1.8 | 1.5E-11 | 2.0 | 5.1E-13 | 1.9 | 3.8 |
| GJC1      | 1.8 | 9.1E-11 | 2.1 | 1.1E-07 | 1.9 | 3.8 |
| KRT86     | 1.9 | 2.2E-12 | 1.9 | 4.3E-12 | 1.9 | 3.8 |
| BCL7A     | 1.6 | 5.1E-07 | 2.2 | 1.3E-11 | 1.9 | 3.8 |
| OLFM2     | 2.3 | 3.8E-12 | 1.5 | 2.8E-08 | 1.9 | 3.8 |
| ENDOD1    | 1.8 | 9.9E-12 | 2.0 | 2.0E-13 | 1.9 | 3.8 |
| MACROD2   | 1.9 | 3.8E-11 | 1.9 | 7.0E-12 | 1.9 | 3.8 |
| ETS1      | 1.4 | 2.5E-05 | 2.4 | 2.2E-11 | 1.9 | 3.7 |
| C16orf53  | 1.6 | 1.2E-10 | 2.2 | 2.6E-14 | 1.9 | 3.7 |
| PIGZ      | 1.9 | 1.7E-12 | 1.9 | 1.4E-12 | 1.9 | 3.7 |
| RAB3D     | 1.8 | 2.9E-04 | 2.0 | 2.0E-07 | 1.9 | 3.7 |
| SLIT2     | 1.9 | 2.5E-12 | 1.9 | 1.2E-12 | 1.9 | 3.7 |
| N4BP2L2   | 2.0 | 1.9E-13 | 1.8 | 1.7E-11 | 1.9 | 3.7 |
| HSPA1B    | 2.0 | 6.3E-13 | 1.8 | 4.8E-12 | 1.9 | 3.7 |
| HSPA1L    | 2.0 | 6.3E-13 | 1.8 | 4.8E-12 | 1.9 | 3.7 |
| HMGB3     | 1.9 | 2.6E-12 | 1.9 | 1.1E-12 | 1.9 | 3.7 |
| ANGPTL4   | 1.9 | 1.1E-12 | 1.9 | 2.5E-12 | 1.9 | 3.7 |
| TMEM158   | 1.9 | 1.5E-12 | 1.9 | 2.3E-12 | 1.9 | 3.7 |
| CAP2      | 2.0 | 2.5E-13 | 1.8 | 1.2E-11 | 1.9 | 3.7 |
| NRAS      | 1.8 | 2.6E-11 | 2.0 | 1.4E-12 | 1.9 | 3.7 |
| PRKY      | 1.7 | 1.3E-10 | 2.1 | 9.2E-14 | 1.9 | 3.7 |
| TUBB2A    | 1.8 | 5.4E-12 | 2.0 | 5.5E-13 | 1.9 | 3.7 |
| CORO6     | 1.8 | 9.0E-12 | 1.9 | 1.3E-12 | 1.9 | 3.7 |
| NPHS2     | 1.7 | 1.7E-07 | 2.0 | 3.3E-11 | 1.9 | 3.7 |
| HIST1H2BJ | 1.8 | 6.5E-12 | 2.0 | 5.2E-13 | 1.9 | 3.7 |
| HAS2      | 1.5 | 1.4E-08 | 2.2 | 4.0E-11 | 1.9 | 3.7 |
| OR2T2     | 1.1 | 2.2E-05 | 2.7 | 2.1E-16 | 1.9 | 3.7 |
| ZCCHC2    | 1.9 | 1.9E-12 | 1.9 | 3.3E-12 | 1.9 | 3.7 |
| PURG      | 2.2 | 1.9E-10 | 1.6 | 5.7E-07 | 1.9 | 3.7 |
| ZNF234    | 1.6 | 1.4E-10 | 2.1 | 5.0E-14 | 1.9 | 3.7 |
| GRIN2D    | 1.7 | 3.1E-11 | 2.0 | 2.0E-13 | 1.9 | 3.7 |
| YPEL1     | 1.9 | 2.7E-12 | 1.9 | 2.7E-12 | 1.9 | 3.7 |
| SLC6A18   | 1.5 | 4.9E-07 | 2.3 | 1.6E-13 | 1.9 | 3.7 |
| TMEM155   | 1.7 | 2.3E-08 | 2.0 | 8.0E-11 | 1.9 | 3.7 |
| HCN2      | 1.7 | 4.8E-11 | 2.1 | 1.3E-13 | 1.9 | 3.7 |
| CRIP2     | 1.8 | 4.0E-12 | 1.9 | 1.5E-12 | 1.9 | 3.7 |
| TEKT2     | 2.0 | 1.8E-12 | 1.7 | 1.9E-10 | 1.9 | 3.7 |
| TMEM151A  | 1.5 | 7.5E-09 | 2.2 | 6.2E-14 | 1.9 | 3.6 |
| TMCC1     | 2.0 | 4.6E-13 | 1.7 | 4.7E-11 | 1.9 | 3.6 |
| SEMA6B    | 1.8 | 6.8E-12 | 1.9 | 1.1E-12 | 1.9 | 3.6 |
| PAK6      | 2.0 | 1.2E-12 | 1.8 | 1.6E-11 | 1.9 | 3.6 |
| KIF3C     | 2.0 | 3.6E-13 | 1.7 | 3.2E-11 | 1.9 | 3.6 |
| CCDC109B  | 1.9 | 3.1E-12 | 1.9 | 3.1E-12 | 1.9 | 3.6 |
| CLEC11A   | 1.6 | 1.3E-10 | 2.1 | 9.4E-14 | 1.9 | 3.6 |
| SOX8      | 1.9 | 2.7E-12 | 1.8 | 4.3E-12 | 1.9 | 3.6 |
| KIAA1009  | 1.7 | 5.2E-10 | 2.0 | 4.1E-12 | 1.9 | 3.6 |
| RARA      | 1.7 | 3.4E-11 | 2.0 | 6.7E-13 | 1.9 | 3.6 |
| TRIM52    | 1.9 | 2.1E-12 | 1.8 | 2.7E-11 | 1.9 | 3.6 |
| KCNS1     | 1.9 | 2.9E-12 | 1.8 | 1.1E-11 | 1.9 | 3.6 |
| TRIM37    | 1.8 | 1.9E-11 | 1.9 | 8.0E-13 | 1.8 | 3.6 |
| MDGA1     | 1.8 | 1.3E-11 | 1.9 | 2.1E-12 | 1.8 | 3.6 |
| IQGAP3    | 1.8 | 3.1E-11 | 1.9 | 2.2E-12 | 1.8 | 3.6 |
| SPNS1     | 1.6 | 1.7E-10 | 2.1 | 1.2E-13 | 1.8 | 3.6 |

|            |     |         |     |         |     |     |
|------------|-----|---------|-----|---------|-----|-----|
| SPACA1     | 1.4 | 2.7E-04 | 2.3 | 4.8E-09 | 1.8 | 3.6 |
| C4orf38    | 1.6 | 7.1E-10 | 2.1 | 1.8E-13 | 1.8 | 3.6 |
| C20orf141  | 1.7 | 2.3E-10 | 2.0 | 4.7E-13 | 1.8 | 3.6 |
| ZSCAN30    | 1.8 | 6.6E-12 | 1.9 | 2.1E-12 | 1.8 | 3.6 |
| MNT        | 1.8 | 2.3E-11 | 1.9 | 1.2E-12 | 1.8 | 3.6 |
| ABCC4      | 1.9 | 5.1E-10 | 1.8 | 3.1E-09 | 1.8 | 3.6 |
| NCRNA00287 | 1.9 | 8.6E-13 | 1.7 | 2.5E-11 | 1.8 | 3.6 |
| CECR6      | 1.9 | 3.8E-10 | 1.8 | 1.1E-09 | 1.8 | 3.6 |
| AMAC1L2    | 1.6 | 1.1E-04 | 2.1 | 4.0E-06 | 1.8 | 3.6 |
| DBN1       | 2.0 | 1.9E-13 | 1.6 | 1.2E-10 | 1.8 | 3.6 |
| AURKC      | 2.1 | 1.7E-12 | 1.6 | 9.2E-10 | 1.8 | 3.6 |
| TNFRSF13C  | 1.8 | 4.4E-08 | 1.9 | 2.7E-10 | 1.8 | 3.6 |
| TMED9      | 1.9 | 1.2E-12 | 1.7 | 1.9E-11 | 1.8 | 3.6 |
| CPAMD8     | 1.8 | 8.8E-12 | 1.9 | 2.2E-12 | 1.8 | 3.6 |
| MEX3B      | 1.8 | 1.4E-11 | 1.9 | 1.7E-12 | 1.8 | 3.6 |
| C20orf107  | 1.6 | 3.2E-10 | 2.1 | 9.9E-14 | 1.8 | 3.6 |
| SCGB3A1    | 1.7 | 2.1E-11 | 1.9 | 1.4E-12 | 1.8 | 3.6 |
| TCL6       | 1.8 | 2.3E-11 | 1.9 | 3.9E-12 | 1.8 | 3.6 |
| LCE5A      | 1.6 | 3.0E-10 | 2.1 | 1.1E-13 | 1.8 | 3.5 |
| ZNF167     | 1.7 | 5.5E-11 | 2.0 | 7.0E-13 | 1.8 | 3.5 |
| SLC9A5     | 1.9 | 4.9E-12 | 1.7 | 6.1E-11 | 1.8 | 3.5 |
| TMEM161B   | 1.9 | 8.0E-13 | 1.7 | 3.7E-11 | 1.8 | 3.5 |
| IL27RA     | 1.9 | 1.7E-12 | 1.7 | 6.0E-11 | 1.8 | 3.5 |
| OGT        | 1.9 | 1.8E-12 | 1.8 | 1.5E-11 | 1.8 | 3.5 |
| SACS       | 1.9 | 7.7E-13 | 1.7 | 3.8E-11 | 1.8 | 3.5 |
| WHSC1      | 1.8 | 2.3E-11 | 1.9 | 2.3E-12 | 1.8 | 3.5 |
| FAM13B     | 1.7 | 4.6E-11 | 1.9 | 3.6E-12 | 1.8 | 3.5 |
| MAGEB1     | 1.7 | 6.2E-06 | 2.0 | 4.8E-09 | 1.8 | 3.5 |
| ZNF347     | 1.9 | 1.1E-10 | 1.8 | 4.4E-10 | 1.8 | 3.5 |
| MPP3       | 1.9 | 2.0E-12 | 1.7 | 2.0E-11 | 1.8 | 3.5 |
| BCAS1      | 1.9 | 2.7E-09 | 1.7 | 9.8E-08 | 1.8 | 3.5 |
| DDB2       | 1.9 | 1.4E-12 | 1.7 | 2.8E-11 | 1.8 | 3.5 |
| IFITM5     | 1.7 | 7.7E-11 | 2.0 | 6.1E-13 | 1.8 | 3.5 |
| LONRF3     | 1.5 | 1.1E-07 | 2.2 | 2.6E-13 | 1.8 | 3.5 |
| CA14       | 1.9 | 4.8E-12 | 1.7 | 5.8E-11 | 1.8 | 3.5 |
| GYG2       | 2.0 | 2.7E-12 | 1.6 | 4.0E-10 | 1.8 | 3.5 |
| MGC27345   | 1.6 | 2.0E-10 | 2.0 | 2.9E-13 | 1.8 | 3.5 |
| IL1F10     | 1.7 | 6.6E-07 | 1.9 | 3.3E-09 | 1.8 | 3.5 |
| FZD9       | 1.8 | 3.0E-10 | 1.8 | 1.9E-10 | 1.8 | 3.5 |
| CD3EAP     | 1.5 | 1.5E-09 | 2.1 | 1.0E-13 | 1.8 | 3.5 |
| C4orf39    | 1.7 | 2.1E-06 | 1.9 | 1.1E-07 | 1.8 | 3.5 |
| CCDC74B    | 1.8 | 4.4E-12 | 1.8 | 1.3E-11 | 1.8 | 3.5 |
| C5orf20    | 1.9 | 3.5E-09 | 1.7 | 7.9E-10 | 1.8 | 3.5 |
| KRTAP4-12  | 1.7 | 1.4E-09 | 1.9 | 1.5E-11 | 1.8 | 3.5 |
| RAD21L1    | 2.0 | 2.6E-12 | 1.6 | 6.4E-10 | 1.8 | 3.5 |
| SNPH       | 2.0 | 2.6E-12 | 1.6 | 6.4E-10 | 1.8 | 3.5 |
| IQCF1      | 1.8 | 1.3E-04 | 1.7 | 3.4E-04 | 1.8 | 3.5 |
| GPR161     | 1.8 | 3.6E-12 | 1.7 | 1.8E-11 | 1.8 | 3.5 |
| SPIRE2     | 1.8 | 1.6E-09 | 1.8 | 2.8E-08 | 1.8 | 3.5 |
| FAT3       | 1.9 | 6.6E-11 | 1.6 | 1.6E-08 | 1.8 | 3.5 |
| SRD5A3     | 1.8 | 1.1E-11 | 1.8 | 6.8E-12 | 1.8 | 3.5 |
| APOBEC2    | 1.7 | 3.1E-04 | 1.9 | 5.5E-08 | 1.8 | 3.5 |
| GALNT8     | 1.9 | 2.1E-06 | 1.7 | 3.9E-09 | 1.8 | 3.5 |
| OPN1MW     | 1.5 | 4.2E-05 | 2.0 | 6.8E-12 | 1.8 | 3.5 |
| ACOX1      | 2.0 | 4.4E-13 | 1.6 | 2.0E-10 | 1.8 | 3.5 |
| MPP2       | 1.8 | 2.5E-11 | 1.8 | 1.9E-11 | 1.8 | 3.5 |
| SLC25A35   | 1.7 | 2.5E-11 | 1.8 | 3.9E-12 | 1.8 | 3.5 |
| ZNF573     | 1.8 | 3.5E-12 | 1.7 | 2.2E-11 | 1.8 | 3.5 |
| ZNF229     | 1.8 | 1.1E-10 | 1.7 | 3.4E-10 | 1.8 | 3.5 |
| PLXNB3     | 1.7 | 1.9E-11 | 1.8 | 4.5E-12 | 1.8 | 3.5 |
| ALPP       | 1.6 | 3.0E-10 | 1.9 | 1.1E-12 | 1.8 | 3.5 |
| ATL1       | 1.9 | 3.7E-12 | 1.7 | 2.8E-11 | 1.8 | 3.5 |

|           |     |         |     |         |     |     |
|-----------|-----|---------|-----|---------|-----|-----|
| CRABP1    | 1.7 | 4.5E-11 | 1.9 | 2.5E-12 | 1.8 | 3.4 |
| BPTF      | 1.5 | 3.3E-09 | 2.1 | 1.3E-13 | 1.8 | 3.4 |
| SRCAP     | 1.6 | 4.7E-09 | 2.0 | 1.8E-12 | 1.8 | 3.4 |
| MARK4     | 1.5 | 8.1E-10 | 2.0 | 2.4E-13 | 1.8 | 3.4 |
| VPREB1    | 1.3 | 9.3E-04 | 2.3 | 2.6E-07 | 1.8 | 3.4 |
| RNF39     | 1.4 | 3.4E-08 | 2.1 | 1.7E-13 | 1.8 | 3.4 |
| FAM182B   | 2.1 | 1.7E-11 | 1.5 | 8.6E-08 | 1.8 | 3.4 |
| DEF8      | 1.8 | 7.4E-12 | 1.8 | 1.5E-11 | 1.8 | 3.4 |
| PARD6G    | 1.6 | 1.1E-10 | 1.9 | 1.4E-12 | 1.8 | 3.4 |
| INE1      | 1.7 | 3.6E-11 | 1.9 | 3.2E-12 | 1.8 | 3.4 |
| KIAA1539  | 1.7 | 1.8E-09 | 1.9 | 6.9E-12 | 1.8 | 3.4 |
| HIST1H2BK | 1.7 | 3.5E-11 | 1.9 | 3.5E-12 | 1.8 | 3.4 |
| SMG1      | 1.7 | 4.1E-11 | 1.9 | 3.1E-12 | 1.8 | 3.4 |
| NELL1     | 1.8 | 2.5E-05 | 1.8 | 8.7E-07 | 1.8 | 3.4 |
| FAM155B   | 1.6 | 4.3E-10 | 1.9 | 6.1E-12 | 1.8 | 3.4 |
| GRHL1     | 1.9 | 2.6E-12 | 1.7 | 5.5E-11 | 1.8 | 3.4 |
| DLX2      | 1.6 | 9.7E-07 | 2.0 | 8.4E-08 | 1.8 | 3.4 |
| ABCB10    | 1.9 | 2.3E-12 | 1.7 | 7.2E-11 | 1.8 | 3.4 |
| ZNF271    | 1.8 | 2.0E-11 | 1.7 | 4.8E-11 | 1.8 | 3.4 |
| SYNE2     | 1.9 | 2.1E-12 | 1.7 | 8.1E-11 | 1.8 | 3.4 |
| GALNTL1   | 1.9 | 3.1E-12 | 1.7 | 6.6E-11 | 1.8 | 3.4 |
| SPATA18   | 2.1 | 1.1E-10 | 1.5 | 8.6E-08 | 1.8 | 3.4 |
| DBNDD1    | 1.7 | 4.4E-11 | 1.8 | 7.3E-12 | 1.8 | 3.4 |
| GPR125    | 1.9 | 2.3E-12 | 1.6 | 8.6E-11 | 1.8 | 3.4 |
| GAS2L1    | 1.8 | 1.6E-11 | 1.7 | 3.2E-11 | 1.8 | 3.4 |
| ABI2      | 1.9 | 3.3E-12 | 1.7 | 7.1E-11 | 1.8 | 3.4 |
| ENO2      | 1.9 | 1.1E-11 | 1.7 | 1.8E-10 | 1.8 | 3.4 |
| ZDHHC21   | 1.7 | 2.2E-11 | 1.8 | 1.5E-11 | 1.8 | 3.4 |
| CRIPAK    | 1.7 | 4.6E-11 | 1.8 | 6.1E-12 | 1.8 | 3.4 |
| TPSG1     | 1.7 | 1.8E-11 | 1.8 | 1.2E-11 | 1.8 | 3.4 |
| B4GALNT1  | 1.8 | 1.0E-09 | 1.7 | 3.4E-09 | 1.8 | 3.4 |
| SLX4      | 1.7 | 2.0E-11 | 1.8 | 1.3E-11 | 1.8 | 3.4 |
| PRB3      | 1.7 | 9.8E-11 | 1.8 | 1.6E-11 | 1.8 | 3.4 |
| GPR98     | 1.6 | 1.2E-09 | 1.9 | 2.0E-12 | 1.7 | 3.4 |
| C20orf165 | 1.8 | 2.3E-08 | 1.7 | 2.4E-09 | 1.7 | 3.4 |
| HIST2H2BF | 1.6 | 9.9E-11 | 1.9 | 3.5E-12 | 1.7 | 3.4 |
| ZNF567    | 1.7 | 8.0E-11 | 1.8 | 6.3E-12 | 1.7 | 3.4 |
| SEC22C    | 1.6 | 9.9E-09 | 1.9 | 4.7E-11 | 1.7 | 3.4 |
| CAPN6     | 1.9 | 2.5E-12 | 1.6 | 7.8E-10 | 1.7 | 3.4 |
| FGD4      | 1.9 | 4.9E-12 | 1.6 | 3.5E-10 | 1.7 | 3.4 |
| RAB39B    | 1.6 | 1.3E-06 | 1.9 | 2.5E-09 | 1.7 | 3.4 |
| NTNG2     | 1.8 | 1.1E-11 | 1.7 | 1.2E-10 | 1.7 | 3.4 |
| FAM167B   | 1.9 | 1.8E-12 | 1.6 | 3.4E-10 | 1.7 | 3.3 |
| BCAS4     | 1.9 | 3.7E-10 | 1.6 | 7.9E-08 | 1.7 | 3.3 |
| C3orf14   | 1.6 | 2.2E-10 | 1.9 | 3.0E-12 | 1.7 | 3.3 |
| SOX18     | 1.4 | 2.1E-08 | 2.0 | 2.6E-13 | 1.7 | 3.3 |
| BASP1     | 1.7 | 4.0E-11 | 1.8 | 1.0E-11 | 1.7 | 3.3 |
| FUS       | 1.9 | 2.8E-12 | 1.6 | 1.6E-10 | 1.7 | 3.3 |
| CCL27     | 2.0 | 7.3E-12 | 1.5 | 5.9E-09 | 1.7 | 3.3 |
| KCNK13    | 1.6 | 8.1E-08 | 1.9 | 4.1E-10 | 1.7 | 3.3 |
| PDXP      | 1.3 | 8.6E-06 | 2.2 | 7.0E-12 | 1.7 | 3.3 |
| ANKRD11   | 1.6 | 1.1E-10 | 1.8 | 4.5E-12 | 1.7 | 3.3 |
| WDR35     | 2.0 | 1.7E-12 | 1.5 | 2.0E-09 | 1.7 | 3.3 |
| LRRN3     | 1.9 | 4.6E-12 | 1.6 | 4.7E-10 | 1.7 | 3.3 |
| PCDHB13   | 1.7 | 7.2E-11 | 1.8 | 9.5E-12 | 1.7 | 3.3 |
| PCBP4     | 1.7 | 3.1E-11 | 1.7 | 1.7E-11 | 1.7 | 3.3 |
| CCDC88B   | 1.9 | 2.2E-12 | 1.6 | 2.7E-10 | 1.7 | 3.3 |
| WSB2      | 1.8 | 9.5E-12 | 1.7 | 5.8E-11 | 1.7 | 3.3 |
| SOX4      | 1.5 | 1.1E-09 | 2.0 | 6.7E-13 | 1.7 | 3.3 |
| MGEA5     | 1.8 | 8.4E-12 | 1.7 | 6.7E-11 | 1.7 | 3.3 |
| VWA5B2    | 1.3 | 3.8E-06 | 2.1 | 2.2E-12 | 1.7 | 3.3 |
| FNDC3B    | 1.8 | 1.1E-11 | 1.7 | 5.5E-11 | 1.7 | 3.3 |

|          |     |         |     |         |     |     |
|----------|-----|---------|-----|---------|-----|-----|
| PLAT     | 1.8 | 1.2E-11 | 1.7 | 4.9E-11 | 1.7 | 3.3 |
| ZNF643   | 2.0 | 3.3E-10 | 1.5 | 1.9E-07 | 1.7 | 3.3 |
| EFNB3    | 1.6 | 3.2E-09 | 1.9 | 2.7E-12 | 1.7 | 3.3 |
| COMP     | 2.0 | 3.7E-12 | 1.5 | 5.3E-09 | 1.7 | 3.3 |
| SLC25A29 | 1.7 | 9.8E-11 | 1.8 | 1.1E-11 | 1.7 | 3.3 |
| PCYOX1L  | 1.7 | 5.2E-11 | 1.8 | 1.6E-11 | 1.7 | 3.3 |
| YARS2    | 1.8 | 1.3E-11 | 1.7 | 6.8E-11 | 1.7 | 3.3 |
| FLT4     | 1.6 | 3.7E-08 | 1.8 | 6.1E-11 | 1.7 | 3.3 |
| PCDHB9   | 1.6 | 1.8E-10 | 1.8 | 9.0E-12 | 1.7 | 3.3 |
| PNMA1    | 1.6 | 1.5E-10 | 1.8 | 6.0E-12 | 1.7 | 3.3 |
| DNM1L    | 1.7 | 9.4E-11 | 1.7 | 6.0E-11 | 1.7 | 3.3 |
| TAF15    | 1.9 | 2.8E-12 | 1.6 | 3.6E-10 | 1.7 | 3.3 |
| AHCYL2   | 1.8 | 8.4E-11 | 1.6 | 4.2E-10 | 1.7 | 3.3 |
| C12orf53 | 1.5 | 1.0E-07 | 1.9 | 2.5E-12 | 1.7 | 3.3 |
| ZNF692   | 1.9 | 1.5E-12 | 1.5 | 7.7E-10 | 1.7 | 3.3 |
| SLMO1    | 1.8 | 1.1E-11 | 1.6 | 9.4E-11 | 1.7 | 3.3 |
| APP      | 1.9 | 2.4E-12 | 1.5 | 4.9E-10 | 1.7 | 3.3 |
| GPR25    | 1.8 | 3.5E-07 | 1.6 | 4.6E-09 | 1.7 | 3.3 |
| IGF2BP3  | 1.8 | 9.5E-12 | 1.6 | 1.1E-10 | 1.7 | 3.3 |
| PBX4     | 1.8 | 8.4E-12 | 1.6 | 1.5E-10 | 1.7 | 3.3 |
| ADAMTS7  | 1.5 | 9.8E-10 | 1.9 | 1.8E-12 | 1.7 | 3.3 |
| ZNF71    | 1.8 | 4.5E-12 | 1.6 | 2.9E-10 | 1.7 | 3.3 |
| SCGB1A1  | 1.6 | 3.8E-09 | 1.8 | 2.6E-11 | 1.7 | 3.3 |
| LCE1E    | 1.5 | 1.6E-09 | 1.9 | 1.0E-12 | 1.7 | 3.3 |
| SPRY4    | 1.6 | 2.0E-10 | 1.8 | 7.7E-12 | 1.7 | 3.3 |
| FANCC    | 1.7 | 3.9E-11 | 1.7 | 5.0E-11 | 1.7 | 3.2 |
| CASP14   | 2.1 | 1.5E-05 | 1.3 | 3.2E-04 | 1.7 | 3.2 |
| CDKN2D   | 1.7 | 1.8E-11 | 1.7 | 8.0E-11 | 1.7 | 3.2 |
| BCAM     | 1.6 | 1.6E-10 | 1.8 | 1.4E-11 | 1.7 | 3.2 |
| TCTEX1D2 | 1.7 | 2.1E-11 | 1.7 | 7.3E-11 | 1.7 | 3.2 |
| PIAS4    | 1.3 | 8.4E-08 | 2.1 | 3.0E-13 | 1.7 | 3.2 |
| NDOR1    | 1.6 | 1.7E-10 | 1.8 | 1.0E-11 | 1.7 | 3.2 |
| NUDT3    | 1.5 | 1.2E-09 | 1.9 | 2.0E-12 | 1.7 | 3.2 |
| C17orf50 | 1.4 | 9.8E-09 | 2.0 | 7.1E-13 | 1.7 | 3.2 |
| ABCC5    | 1.7 | 4.5E-11 | 1.7 | 3.6E-11 | 1.7 | 3.2 |
| P2RX1    | 1.4 | 1.6E-07 | 2.0 | 2.0E-12 | 1.7 | 3.2 |
| OPCML    | 1.7 | 5.2E-11 | 1.7 | 5.9E-11 | 1.7 | 3.2 |
| MMP17    | 1.3 | 3.2E-08 | 2.1 | 1.3E-13 | 1.7 | 3.2 |
| CES8     | 1.8 | 7.2E-08 | 1.6 | 6.3E-05 | 1.7 | 3.2 |
| DSCR6    | 1.8 | 1.0E-11 | 1.6 | 2.1E-10 | 1.7 | 3.2 |
| ANGPT4   | 2.1 | 6.7E-08 | 1.3 | 2.6E-05 | 1.7 | 3.2 |
| RPAIN    | 1.8 | 1.3E-11 | 1.6 | 1.6E-10 | 1.7 | 3.2 |
| PIN4     | 1.6 | 6.2E-10 | 1.7 | 5.1E-11 | 1.7 | 3.2 |
| GNA13    | 1.7 | 2.8E-10 | 1.7 | 1.4E-10 | 1.7 | 3.2 |
| STARD4   | 1.4 | 7.4E-08 | 2.0 | 1.6E-12 | 1.7 | 3.2 |
| CD6      | 1.4 | 1.2E-06 | 2.0 | 3.1E-11 | 1.7 | 3.2 |
| SPINK1   | 1.8 | 6.3E-12 | 1.6 | 4.6E-10 | 1.7 | 3.2 |
| HHATL    | 1.9 | 4.1E-07 | 1.5 | 2.3E-05 | 1.7 | 3.2 |
| DNMT3A   | 1.7 | 2.4E-11 | 1.6 | 1.2E-10 | 1.7 | 3.2 |
| PRAC     | 1.7 | 2.7E-11 | 1.6 | 1.1E-10 | 1.7 | 3.2 |
| NUP93    | 1.7 | 5.0E-11 | 1.7 | 6.5E-11 | 1.7 | 3.2 |
| RNF207   | 1.7 | 1.7E-10 | 1.6 | 1.5E-10 | 1.7 | 3.2 |
| RCC1     | 1.7 | 7.7E-11 | 1.7 | 4.1E-11 | 1.7 | 3.2 |
| LIME1    | 1.4 | 1.6E-08 | 1.9 | 1.3E-12 | 1.7 | 3.2 |
| HIST1H4I | 2.0 | 2.0E-08 | 1.3 | 3.4E-05 | 1.7 | 3.2 |
| MAP3K15  | 1.6 | 9.0E-10 | 1.7 | 1.1E-10 | 1.7 | 3.2 |
| TCF3     | 1.9 | 1.7E-12 | 1.4 | 3.0E-09 | 1.7 | 3.2 |
| DNAJC18  | 1.8 | 1.2E-11 | 1.6 | 4.0E-10 | 1.7 | 3.2 |
| THAP2    | 1.9 | 4.9E-12 | 1.4 | 1.8E-08 | 1.7 | 3.2 |
| HACE1    | 1.6 | 1.9E-10 | 1.7 | 3.7E-11 | 1.7 | 3.2 |
| CRTC1    | 1.4 | 3.3E-09 | 1.9 | 1.8E-12 | 1.7 | 3.2 |
| DCLK2    | 1.7 | 4.2E-09 | 1.6 | 2.9E-08 | 1.7 | 3.2 |

|           |     |         |     |         |     |     |
|-----------|-----|---------|-----|---------|-----|-----|
| FOXN1     | 1.8 | 2.7E-05 | 1.5 | 9.9E-06 | 1.7 | 3.2 |
| HIST1H2AD | 1.7 | 6.6E-11 | 1.7 | 7.5E-11 | 1.7 | 3.2 |
| SYP       | 1.5 | 4.2E-09 | 1.8 | 9.2E-12 | 1.7 | 3.2 |
| TSGA10    | 1.9 | 3.0E-11 | 1.5 | 4.6E-09 | 1.7 | 3.2 |
| ANP32C    | 1.8 | 1.2E-11 | 1.5 | 8.7E-10 | 1.7 | 3.2 |
| TNFRSF4   | 1.5 | 1.3E-08 | 1.9 | 4.9E-12 | 1.7 | 3.2 |
| PCIF1     | 1.5 | 1.2E-09 | 1.8 | 8.9E-12 | 1.7 | 3.1 |
| SHOX2     | 1.5 | 8.6E-06 | 1.9 | 3.7E-08 | 1.7 | 3.1 |
| F7        | 1.4 | 1.2E-08 | 1.9 | 2.3E-12 | 1.7 | 3.1 |
| HIST1H2AB | 1.8 | 2.4E-11 | 1.5 | 7.6E-10 | 1.7 | 3.1 |
| RBBP6     | 1.7 | 2.6E-11 | 1.6 | 3.1E-10 | 1.6 | 3.1 |
| ZNF501    | 0.9 | 7.8E-04 | 2.4 | 2.2E-11 | 1.6 | 3.1 |
| SLC12A5   | 1.6 | 3.3E-09 | 1.7 | 5.2E-10 | 1.6 | 3.1 |
| KRT81     | 1.7 | 7.8E-11 | 1.6 | 1.1E-10 | 1.6 | 3.1 |
| NICN1     | 1.7 | 3.4E-11 | 1.6 | 3.1E-10 | 1.6 | 3.1 |
| SLC26A8   | 1.5 | 4.3E-06 | 1.8 | 7.7E-10 | 1.6 | 3.1 |
| ZNF514    | 1.6 | 4.6E-10 | 1.7 | 2.4E-11 | 1.6 | 3.1 |
| NEFH      | 1.8 | 4.5E-12 | 1.5 | 2.3E-09 | 1.6 | 3.1 |
| SPTBN4    | 1.5 | 7.4E-10 | 1.8 | 1.3E-11 | 1.6 | 3.1 |
| CDKL3     | 1.8 | 1.5E-11 | 1.5 | 2.0E-09 | 1.6 | 3.1 |
| GGN       | 1.7 | 1.7E-07 | 1.6 | 6.0E-08 | 1.6 | 3.1 |
| CD5       | 1.4 | 9.7E-04 | 1.9 | 3.0E-07 | 1.6 | 3.1 |
| GPR45     | 1.9 | 1.3E-04 | 1.4 | 5.2E-06 | 1.6 | 3.1 |
| RUNDC2A   | 1.5 | 2.1E-09 | 1.8 | 1.1E-11 | 1.6 | 3.1 |
| C14orf115 | 1.4 | 7.6E-05 | 1.9 | 6.2E-06 | 1.6 | 3.1 |
| CHST13    | 1.6 | 2.1E-10 | 1.7 | 6.5E-11 | 1.6 | 3.1 |
| PNMAL1    | 1.5 | 3.7E-09 | 1.7 | 1.1E-10 | 1.6 | 3.1 |
| CLEC2L    | 1.6 | 2.2E-05 | 1.7 | 1.4E-07 | 1.6 | 3.1 |
| ZBTB32    | 1.3 | 2.6E-07 | 2.0 | 1.5E-12 | 1.6 | 3.1 |
| CPT1A     | 1.6 | 2.2E-10 | 1.6 | 1.8E-10 | 1.6 | 3.1 |
| FUT8      | 1.7 | 4.8E-11 | 1.6 | 2.6E-10 | 1.6 | 3.1 |
| C13orf16  | 1.7 | 1.0E-10 | 1.5 | 2.3E-09 | 1.6 | 3.1 |
| NOVA2     | 1.4 | 5.9E-08 | 1.9 | 1.8E-11 | 1.6 | 3.1 |
| MLF1      | 1.8 | 4.3E-12 | 1.4 | 3.6E-09 | 1.6 | 3.1 |
| MEIS3     | 1.6 | 1.1E-06 | 1.6 | 1.1E-06 | 1.6 | 3.1 |
| PRKCB     | 1.6 | 1.8E-09 | 1.6 | 3.4E-10 | 1.6 | 3.1 |
| IL27      | 1.7 | 1.7E-11 | 1.5 | 8.4E-10 | 1.6 | 3.1 |
| DNAJC1    | 1.7 | 3.2E-11 | 1.6 | 4.4E-10 | 1.6 | 3.1 |
| FAM193B   | 1.8 | 5.1E-12 | 1.4 | 3.3E-09 | 1.6 | 3.1 |
| HIST1H2BM | 1.6 | 3.4E-10 | 1.7 | 4.4E-11 | 1.6 | 3.1 |
| DENND5A   | 1.6 | 1.4E-10 | 1.6 | 1.0E-10 | 1.6 | 3.1 |
| CDKL2     | 1.6 | 3.2E-07 | 1.7 | 9.4E-08 | 1.6 | 3.1 |
| MAGEA8    | 1.3 | 6.5E-06 | 1.9 | 1.2E-04 | 1.6 | 3.1 |
| COX1      | 1.5 | 1.6E-09 | 1.8 | 1.1E-11 | 1.6 | 3.1 |
| RPRD1A    | 1.7 | 8.8E-11 | 1.6 | 4.4E-10 | 1.6 | 3.1 |
| C10orf110 | 1.5 | 5.3E-05 | 1.8 | 1.1E-05 | 1.6 | 3.1 |
| NRG1      | 1.8 | 1.3E-09 | 1.4 | 7.9E-08 | 1.6 | 3.1 |
| COTL1     | 1.5 | 1.5E-09 | 1.7 | 2.2E-11 | 1.6 | 3.1 |
| NXF5      | 1.6 | 5.7E-06 | 1.7 | 2.7E-10 | 1.6 | 3.1 |
| CLEC2D    | 1.6 | 3.7E-10 | 1.7 | 6.4E-11 | 1.6 | 3.1 |
| TRA2A     | 1.5 | 5.9E-10 | 1.7 | 3.4E-11 | 1.6 | 3.1 |
| STAU2     | 1.7 | 9.1E-11 | 1.6 | 4.2E-10 | 1.6 | 3.1 |
| SYT1      | 1.2 | 2.2E-06 | 2.0 | 1.5E-10 | 1.6 | 3.1 |
| SLC6A8    | 1.5 | 4.0E-09 | 1.8 | 2.1E-11 | 1.6 | 3.1 |
| WFIKKN2   | 1.3 | 3.8E-04 | 2.0 | 1.5E-09 | 1.6 | 3.1 |
| ZNF239    | 1.6 | 5.2E-10 | 1.7 | 6.4E-11 | 1.6 | 3.1 |
| PROM2     | 1.6 | 4.2E-10 | 1.6 | 8.7E-10 | 1.6 | 3.1 |
| GRIK3     | 1.5 | 1.6E-04 | 1.7 | 5.1E-08 | 1.6 | 3.1 |
| MYCN      | 1.2 | 3.0E-05 | 2.1 | 3.2E-12 | 1.6 | 3.1 |
| SORCS1    | 1.9 | 1.0E-08 | 1.3 | 4.6E-06 | 1.6 | 3.1 |
| TGFB2     | 1.9 | 6.7E-09 | 1.4 | 9.2E-06 | 1.6 | 3.1 |
| ARHGEF10  | 1.6 | 1.4E-10 | 1.6 | 1.8E-10 | 1.6 | 3.1 |

|          |     |         |     |         |     |     |
|----------|-----|---------|-----|---------|-----|-----|
| DAB1     | 1.2 | 3.6E-07 | 2.0 | 5.8E-13 | 1.6 | 3.1 |
| CDH19    | 1.8 | 6.8E-11 | 1.4 | 8.2E-09 | 1.6 | 3.1 |
| NPIP     | 1.6 | 4.7E-10 | 1.7 | 6.5E-11 | 1.6 | 3.1 |
| NPL      | 1.6 | 4.2E-10 | 1.7 | 9.0E-11 | 1.6 | 3.0 |
| FSD1L    | 1.8 | 4.4E-07 | 1.4 | 4.2E-05 | 1.6 | 3.0 |
| AGT      | 1.8 | 1.5E-11 | 1.5 | 2.3E-09 | 1.6 | 3.0 |
| BEST3    | 1.6 | 3.6E-10 | 1.6 | 1.1E-10 | 1.6 | 3.0 |
| C6orf164 | 1.5 | 5.9E-05 | 1.7 | 1.6E-07 | 1.6 | 3.0 |
| CHD9     | 1.7 | 1.1E-10 | 1.5 | 1.5E-09 | 1.6 | 3.0 |
| C10orf12 | 1.7 | 8.9E-07 | 1.6 | 1.7E-06 | 1.6 | 3.0 |
| ZFP62    | 1.6 | 4.2E-10 | 1.7 | 8.3E-11 | 1.6 | 3.0 |
| ZKSCAN1  | 1.5 | 6.9E-10 | 1.7 | 5.3E-11 | 1.6 | 3.0 |
| S1PR5    | 1.6 | 1.9E-08 | 1.6 | 2.5E-08 | 1.6 | 3.0 |
| KCNC3    | 1.6 | 1.6E-07 | 1.6 | 1.3E-09 | 1.6 | 3.0 |
| URB2     | 1.7 | 2.0E-11 | 1.5 | 2.6E-09 | 1.6 | 3.0 |
| PNPLA6   | 1.5 | 1.5E-09 | 1.7 | 7.0E-11 | 1.6 | 3.0 |
| SRD5A1   | 1.7 | 3.3E-10 | 1.5 | 3.0E-09 | 1.6 | 3.0 |
| SLC35F3  | 1.8 | 8.4E-09 | 1.4 | 1.9E-06 | 1.6 | 3.0 |
| NPR2     | 1.5 | 1.1E-09 | 1.7 | 4.7E-11 | 1.6 | 3.0 |
| AUTS2    | 1.5 | 9.9E-10 | 1.7 | 4.6E-11 | 1.6 | 3.0 |
| TM2D1    | 1.7 | 8.3E-11 | 1.5 | 5.6E-10 | 1.6 | 3.0 |
| GP2      | 1.4 | 3.6E-09 | 1.8 | 1.5E-11 | 1.6 | 3.0 |
| PEA15    | 1.4 | 4.2E-09 | 1.8 | 1.6E-11 | 1.6 | 3.0 |
| STAC2    | 1.5 | 1.5E-09 | 1.6 | 1.2E-10 | 1.6 | 3.0 |
| GPHA2    | 1.4 | 1.2E-04 | 1.8 | 4.6E-10 | 1.6 | 3.0 |
| PITX3    | 1.4 | 1.3E-08 | 1.8 | 1.5E-11 | 1.6 | 3.0 |
| SYT2     | 1.6 | 2.3E-06 | 1.6 | 1.6E-07 | 1.6 | 3.0 |
| ZNF616   | 1.9 | 1.1E-07 | 1.3 | 3.5E-06 | 1.6 | 3.0 |
| FAM69B   | 1.6 | 2.1E-10 | 1.6 | 3.5E-10 | 1.6 | 3.0 |
| PDE4C    | 1.4 | 5.4E-09 | 1.8 | 1.2E-11 | 1.6 | 3.0 |
| ABCA2    | 1.4 | 3.5E-07 | 1.8 | 1.2E-10 | 1.6 | 3.0 |
| KIRREL   | 1.2 | 6.0E-06 | 2.0 | 4.1E-12 | 1.6 | 3.0 |
| C18orf22 | 1.5 | 1.0E-09 | 1.7 | 6.1E-11 | 1.6 | 3.0 |
| TOX      | 1.4 | 4.4E-06 | 1.8 | 1.6E-08 | 1.6 | 3.0 |
| GDI1     | 1.5 | 8.5E-10 | 1.7 | 7.9E-11 | 1.6 | 3.0 |
| DEFB1    | 1.5 | 6.0E-10 | 1.6 | 1.2E-10 | 1.6 | 3.0 |
| ATP2B3   | 1.4 | 1.4E-06 | 1.7 | 5.3E-09 | 1.6 | 3.0 |
| LCE3D    | 1.5 | 2.3E-09 | 1.7 | 4.5E-11 | 1.6 | 3.0 |
| LCE3E    | 1.5 | 2.3E-09 | 1.7 | 4.5E-11 | 1.6 | 3.0 |
| ABCA9    | 1.7 | 7.5E-10 | 1.5 | 4.7E-09 | 1.6 | 3.0 |
| C7orf13  | 1.6 | 2.2E-08 | 1.5 | 1.1E-07 | 1.6 | 3.0 |
| PRIC285  | 1.3 | 3.9E-05 | 1.8 | 5.7E-11 | 1.6 | 3.0 |
| PDE3B    | 1.6 | 1.0E-07 | 1.6 | 3.2E-08 | 1.6 | 3.0 |
| ZNF418   | 1.5 | 1.3E-09 | 1.6 | 1.7E-10 | 1.6 | 3.0 |
| NEURL    | 1.5 | 4.8E-10 | 1.6 | 1.8E-10 | 1.6 | 3.0 |
| H2AFY2   | 1.7 | 2.8E-11 | 1.4 | 5.8E-09 | 1.6 | 3.0 |
| EPOR     | 1.6 | 2.5E-10 | 1.6 | 5.7E-10 | 1.6 | 3.0 |
| METTL7B  | 1.5 | 2.2E-09 | 1.7 | 7.8E-11 | 1.6 | 3.0 |
| COL4A3   | 1.7 | 2.1E-09 | 1.5 | 2.1E-08 | 1.6 | 3.0 |
| MTSS1    | 1.6 | 2.5E-10 | 1.6 | 5.1E-10 | 1.6 | 3.0 |
| MMP3     | 1.6 | 2.4E-10 | 1.5 | 1.4E-09 | 1.6 | 3.0 |
| NHEDC2   | 1.4 | 7.8E-07 | 1.7 | 5.7E-11 | 1.6 | 3.0 |
| BAHD1    | 1.6 | 2.6E-10 | 1.6 | 3.7E-10 | 1.6 | 3.0 |
| FKBP14   | 1.6 | 2.0E-10 | 1.5 | 6.7E-10 | 1.6 | 3.0 |
| KIAA1984 | 1.6 | 7.9E-06 | 1.6 | 1.9E-08 | 1.6 | 3.0 |
| LRRC20   | 1.7 | 6.3E-11 | 1.5 | 1.8E-09 | 1.6 | 3.0 |
| WASF1    | 1.5 | 5.5E-10 | 1.6 | 2.1E-10 | 1.6 | 3.0 |
| ZNF202   | 1.7 | 8.6E-10 | 1.4 | 4.0E-08 | 1.6 | 3.0 |
| CCPG1    | 1.5 | 7.2E-10 | 1.6 | 2.1E-10 | 1.6 | 3.0 |
| ANP32D   | 1.8 | 3.8E-10 | 1.3 | 1.5E-07 | 1.6 | 3.0 |
| CSTF2T   | 1.6 | 9.2E-10 | 1.5 | 9.1E-10 | 1.6 | 3.0 |
| RGS17    | 1.8 | 1.1E-06 | 1.4 | 1.6E-05 | 1.6 | 3.0 |

|          |     |         |     |         |     |     |
|----------|-----|---------|-----|---------|-----|-----|
| ZC3H7B   | 1.5 | 1.2E-09 | 1.6 | 1.3E-10 | 1.6 | 3.0 |
| C16orf87 | 1.6 | 1.2E-10 | 1.5 | 1.1E-09 | 1.6 | 3.0 |
| TUSC3    | 1.7 | 2.9E-11 | 1.4 | 4.6E-09 | 1.6 | 3.0 |
| REC8     | 1.7 | 2.3E-11 | 1.4 | 6.2E-09 | 1.6 | 3.0 |
| PIM1     | 1.7 | 4.1E-11 | 1.4 | 4.6E-09 | 1.6 | 3.0 |
| CCDC112  | 1.5 | 1.1E-09 | 1.6 | 1.3E-10 | 1.6 | 3.0 |
| TMEM121  | 1.8 | 1.3E-11 | 1.4 | 1.2E-08 | 1.6 | 3.0 |
| HCRT     | 1.6 | 1.8E-10 | 1.5 | 1.2E-09 | 1.6 | 3.0 |
| SNX10    | 1.6 | 3.5E-10 | 1.6 | 4.3E-10 | 1.6 | 3.0 |
| DLK2     | 1.5 | 7.7E-10 | 1.6 | 2.8E-10 | 1.6 | 3.0 |
| ATF6B    | 1.5 | 7.9E-08 | 1.6 | 3.5E-10 | 1.6 | 3.0 |
| GNL3L    | 1.7 | 8.3E-11 | 1.4 | 6.8E-09 | 1.6 | 3.0 |
| DCBLD2   | 1.7 | 5.0E-10 | 1.4 | 1.9E-07 | 1.6 | 3.0 |
| FSIP2    | 1.5 | 1.2E-09 | 1.6 | 1.3E-10 | 1.6 | 3.0 |
| NUDT13   | 1.8 | 3.7E-09 | 1.3 | 1.4E-06 | 1.6 | 3.0 |
| TMEM22   | 1.6 | 3.1E-10 | 1.5 | 7.9E-10 | 1.6 | 2.9 |
| CDK1     | 1.8 | 1.2E-11 | 1.3 | 1.6E-08 | 1.6 | 2.9 |
| SPOCK1   | 1.5 | 6.1E-08 | 1.6 | 4.4E-09 | 1.6 | 2.9 |
| GPT      | 1.2 | 6.6E-07 | 1.9 | 9.1E-13 | 1.6 | 2.9 |
| VASH1    | 1.5 | 1.4E-09 | 1.6 | 1.3E-10 | 1.6 | 2.9 |
| TRIM45   | 1.7 | 5.6E-11 | 1.4 | 4.0E-09 | 1.6 | 2.9 |
| DGKQ     | 1.4 | 4.3E-07 | 1.7 | 1.3E-10 | 1.6 | 2.9 |
| HOXC8    | 1.5 | 1.2E-05 | 1.6 | 1.6E-06 | 1.6 | 2.9 |
| ZNF358   | 1.3 | 2.8E-08 | 1.8 | 9.4E-12 | 1.6 | 2.9 |
| P2RX2    | 1.5 | 6.3E-08 | 1.6 | 2.1E-09 | 1.6 | 2.9 |
| ZNF783   | 1.2 | 1.2E-07 | 1.9 | 8.6E-05 | 1.6 | 2.9 |
| ATF2     | 1.6 | 5.1E-10 | 1.5 | 1.8E-09 | 1.5 | 2.9 |
| C1orf63  | 1.7 | 5.6E-11 | 1.4 | 4.8E-09 | 1.5 | 2.9 |
| OSBPL11  | 1.4 | 1.4E-08 | 1.7 | 2.1E-11 | 1.5 | 2.9 |
| MEOX2    | 1.8 | 2.8E-09 | 1.2 | 4.4E-06 | 1.5 | 2.9 |
| CC2D1A   | 1.6 | 4.4E-10 | 1.5 | 8.0E-10 | 1.5 | 2.9 |
| ZNF548   | 1.8 | 2.6E-11 | 1.3 | 3.9E-08 | 1.5 | 2.9 |
| VSIG2    | 1.4 | 1.7E-07 | 1.7 | 3.9E-10 | 1.5 | 2.9 |
| BCL9     | 1.5 | 9.9E-04 | 1.6 | 6.5E-04 | 1.5 | 2.9 |
| SDK2     | 1.5 | 2.0E-09 | 1.6 | 1.7E-10 | 1.5 | 2.9 |
| CCDC33   | 1.4 | 8.7E-09 | 1.7 | 6.4E-11 | 1.5 | 2.9 |
| TRERF1   | 1.7 | 2.0E-11 | 1.3 | 1.8E-08 | 1.5 | 2.9 |
| GTF2H2   | 1.5 | 2.5E-09 | 1.6 | 1.3E-10 | 1.5 | 2.9 |
| MATN4    | 1.3 | 4.2E-06 | 1.8 | 3.9E-09 | 1.5 | 2.9 |
| EDNRB    | 1.7 | 1.4E-10 | 1.4 | 6.5E-09 | 1.5 | 2.9 |
| PHTF2    | 1.3 | 3.9E-05 | 1.8 | 2.5E-08 | 1.5 | 2.9 |
| MAP3K10  | 1.2 | 1.0E-07 | 1.8 | 4.5E-12 | 1.5 | 2.9 |
| POLG     | 1.6 | 9.8E-11 | 1.4 | 3.6E-09 | 1.5 | 2.9 |
| P2RX3    | 1.2 | 9.6E-06 | 1.8 | 4.3E-11 | 1.5 | 2.9 |
| MAP1A    | 1.5 | 1.8E-09 | 1.6 | 2.1E-10 | 1.5 | 2.9 |
| HDAC10   | 1.3 | 1.6E-08 | 1.7 | 2.6E-11 | 1.5 | 2.9 |
| CAPN8    | 1.6 | 2.7E-10 | 1.5 | 2.5E-09 | 1.5 | 2.9 |
| PCSK4    | 1.6 | 1.4E-10 | 1.4 | 3.5E-09 | 1.5 | 2.9 |
| IL28A    | 1.2 | 2.3E-06 | 1.8 | 3.2E-11 | 1.5 | 2.9 |
| FLJ11710 | 1.3 | 9.8E-08 | 1.8 | 6.9E-12 | 1.5 | 2.9 |
| ATP2B2   | 1.5 | 3.5E-06 | 1.6 | 4.5E-08 | 1.5 | 2.9 |
| PXN      | 1.2 | 9.7E-08 | 1.8 | 6.6E-12 | 1.5 | 2.9 |
| IGFBP2   | 1.4 | 3.3E-09 | 1.6 | 1.5E-10 | 1.5 | 2.9 |
| FCN3     | 1.5 | 1.8E-08 | 1.5 | 2.8E-09 | 1.5 | 2.9 |
| SIPA1L1  | 1.5 | 5.7E-10 | 1.5 | 1.0E-09 | 1.5 | 2.9 |
| HSPA8    | 1.3 | 3.3E-08 | 1.7 | 2.0E-11 | 1.5 | 2.9 |
| FIZ1     | 1.2 | 3.4E-06 | 1.9 | 4.7E-11 | 1.5 | 2.9 |
| C20orf12 | 1.5 | 2.9E-09 | 1.6 | 4.3E-10 | 1.5 | 2.9 |
| SH3BGR   | 1.8 | 1.9E-11 | 1.3 | 9.1E-08 | 1.5 | 2.9 |
| C5orf13  | 1.4 | 8.7E-09 | 1.7 | 8.8E-11 | 1.5 | 2.9 |
| HOXA3    | 1.3 | 1.6E-08 | 1.7 | 4.5E-11 | 1.5 | 2.9 |
| FBXO46   | 1.6 | 1.5E-10 | 1.4 | 4.4E-09 | 1.5 | 2.9 |

|           |     |         |     |         |     |     |
|-----------|-----|---------|-----|---------|-----|-----|
| RGS20     | 1.7 | 9.9E-09 | 1.3 | 1.5E-06 | 1.5 | 2.9 |
| LRP12     | 1.5 | 4.2E-09 | 1.6 | 7.8E-10 | 1.5 | 2.9 |
| MLL       | 1.6 | 3.9E-10 | 1.5 | 1.8E-09 | 1.5 | 2.9 |
| TUSC5     | 1.5 | 5.7E-06 | 1.5 | 1.0E-06 | 1.5 | 2.9 |
| SLC5A2    | 1.5 | 2.8E-09 | 1.5 | 5.4E-10 | 1.5 | 2.9 |
| PTBP2     | 1.5 | 9.4E-10 | 1.5 | 8.2E-10 | 1.5 | 2.9 |
| CCND3     | 1.1 | 4.5E-04 | 1.9 | 7.8E-07 | 1.5 | 2.9 |
| MRPL52    | 1.5 | 8.1E-09 | 1.6 | 1.8E-09 | 1.5 | 2.9 |
| CCL18     | 1.4 | 6.6E-09 | 1.6 | 1.6E-10 | 1.5 | 2.9 |
| PDE4DIP   | 1.5 | 3.2E-09 | 1.5 | 1.9E-09 | 1.5 | 2.9 |
| KCNN2     | 1.3 | 3.1E-07 | 1.8 | 2.2E-11 | 1.5 | 2.9 |
| TRO       | 1.5 | 1.1E-09 | 1.5 | 7.7E-10 | 1.5 | 2.8 |
| CRHR1     | 1.5 | 9.7E-10 | 1.5 | 1.1E-09 | 1.5 | 2.8 |
| CSTF3     | 1.7 | 8.2E-11 | 1.4 | 1.3E-08 | 1.5 | 2.8 |
| LIMK2     | 1.7 | 4.3E-11 | 1.3 | 2.5E-08 | 1.5 | 2.8 |
| PPP1R14B  | 1.7 | 4.3E-11 | 1.3 | 2.5E-08 | 1.5 | 2.8 |
| NPFF      | 1.5 | 1.6E-09 | 1.5 | 6.7E-10 | 1.5 | 2.8 |
| HEATR6    | 1.6 | 1.5E-10 | 1.4 | 7.7E-09 | 1.5 | 2.8 |
| TPPP2     | 1.4 | 1.6E-08 | 1.6 | 4.8E-10 | 1.5 | 2.8 |
| FAM114A2  | 1.6 | 4.2E-10 | 1.4 | 3.8E-09 | 1.5 | 2.8 |
| SIGLEC7   | 1.4 | 1.1E-08 | 1.6 | 2.9E-10 | 1.5 | 2.8 |
| TIAM1     | 1.4 | 4.4E-08 | 1.6 | 2.3E-10 | 1.5 | 2.8 |
| DUSP6     | 1.6 | 1.2E-10 | 1.4 | 1.2E-08 | 1.5 | 2.8 |
| DPYSL4    | 1.5 | 6.5E-08 | 1.5 | 5.8E-09 | 1.5 | 2.8 |
| TRAM1L1   | 1.6 | 1.3E-09 | 1.4 | 1.3E-08 | 1.5 | 2.8 |
| ZNF419    | 1.6 | 9.9E-11 | 1.3 | 1.6E-08 | 1.5 | 2.8 |
| PPP2R5B   | 1.6 | 2.5E-10 | 1.4 | 1.3E-08 | 1.5 | 2.8 |
| NMUR1     | 1.5 | 2.1E-07 | 1.5 | 1.7E-08 | 1.5 | 2.8 |
| RAB4B     | 1.4 | 1.2E-07 | 1.6 | 8.9E-09 | 1.5 | 2.8 |
| STXBP4    | 1.4 | 1.3E-08 | 1.6 | 1.6E-09 | 1.5 | 2.8 |
| CUZD1     | 1.4 | 3.6E-06 | 1.6 | 6.4E-07 | 1.5 | 2.8 |
| PFN2      | 1.4 | 7.8E-09 | 1.6 | 2.3E-10 | 1.5 | 2.8 |
| AMN       | 1.2 | 4.1E-07 | 1.8 | 1.3E-11 | 1.5 | 2.8 |
| CITED4    | 1.5 | 1.1E-09 | 1.5 | 1.5E-09 | 1.5 | 2.8 |
| CSMD1     | 1.7 | 6.7E-07 | 1.3 | 7.0E-05 | 1.5 | 2.8 |
| KBTBD11   | 1.5 | 1.9E-09 | 1.5 | 1.1E-09 | 1.5 | 2.8 |
| SULT4A1   | 1.8 | 1.4E-08 | 1.2 | 1.5E-05 | 1.5 | 2.8 |
| ZNF326    | 1.5 | 8.2E-10 | 1.5 | 2.6E-09 | 1.5 | 2.8 |
| DECR2     | 1.4 | 4.4E-09 | 1.5 | 5.3E-10 | 1.5 | 2.8 |
| ADCY6     | 1.7 | 6.5E-08 | 1.3 | 7.6E-07 | 1.5 | 2.8 |
| ANKK1     | 1.4 | 3.6E-09 | 1.5 | 6.7E-10 | 1.5 | 2.8 |
| SETD6     | 1.5 | 1.4E-09 | 1.5 | 3.0E-09 | 1.5 | 2.8 |
| DDHD1     | 1.3 | 7.2E-08 | 1.6 | 5.9E-10 | 1.5 | 2.8 |
| HIST2H4B  | 1.6 | 3.8E-10 | 1.4 | 1.6E-08 | 1.5 | 2.8 |
| GGT6      | 1.2 | 2.6E-07 | 1.8 | 1.3E-11 | 1.5 | 2.8 |
| KIAA1328  | 1.3 | 2.9E-08 | 1.6 | 1.0E-10 | 1.5 | 2.8 |
| C14orf132 | 1.5 | 2.0E-09 | 1.5 | 1.8E-09 | 1.5 | 2.8 |
| C19orf18  | 1.3 | 2.7E-06 | 1.6 | 9.8E-09 | 1.5 | 2.8 |
| ZNF211    | 1.6 | 1.1E-10 | 1.3 | 3.1E-08 | 1.5 | 2.8 |
| LZTS1     | 1.6 | 4.9E-10 | 1.4 | 7.4E-09 | 1.5 | 2.8 |
| XCR1      | 1.2 | 9.1E-07 | 1.7 | 3.7E-11 | 1.5 | 2.8 |
| FAM181A   | 1.4 | 7.9E-07 | 1.6 | 1.0E-09 | 1.5 | 2.8 |
| SFRS18    | 1.2 | 1.1E-07 | 1.7 | 3.7E-11 | 1.5 | 2.8 |
| VMO1      | 1.6 | 4.6E-10 | 1.3 | 9.1E-08 | 1.5 | 2.8 |
| TLE6      | 1.7 | 7.0E-06 | 1.2 | 1.2E-05 | 1.5 | 2.8 |
| TSPAN11   | 1.4 | 8.0E-05 | 1.5 | 9.7E-07 | 1.5 | 2.8 |
| LCE2A     | 1.1 | 1.6E-06 | 1.8 | 7.0E-12 | 1.5 | 2.8 |
| ARL17A    | 1.6 | 2.9E-10 | 1.3 | 1.7E-08 | 1.5 | 2.8 |
| NAA40     | 1.6 | 3.0E-09 | 1.4 | 1.0E-07 | 1.5 | 2.8 |
| C1QC      | 1.5 | 9.4E-10 | 1.4 | 4.6E-09 | 1.5 | 2.8 |
| PRSS21    | 1.2 | 4.9E-04 | 1.7 | 1.4E-06 | 1.5 | 2.8 |
| MEX3D     | 1.5 | 1.7E-09 | 1.5 | 2.5E-09 | 1.5 | 2.8 |

|           |     |         |     |         |     |     |
|-----------|-----|---------|-----|---------|-----|-----|
| PBRM1     | 1.6 | 8.7E-10 | 1.4 | 2.5E-08 | 1.5 | 2.8 |
| CCDC107   | 1.5 | 2.3E-09 | 1.5 | 2.0E-09 | 1.5 | 2.8 |
| TMEM175   | 1.4 | 4.5E-09 | 1.5 | 1.0E-09 | 1.5 | 2.8 |
| STX2      | 1.5 | 2.8E-09 | 1.5 | 2.1E-09 | 1.5 | 2.8 |
| IER5      | 1.5 | 1.4E-09 | 1.4 | 3.4E-09 | 1.5 | 2.8 |
| CCDC149   | 1.3 | 3.5E-05 | 1.6 | 6.3E-09 | 1.5 | 2.7 |
| AP1G1     | 1.5 | 1.3E-09 | 1.4 | 8.8E-09 | 1.5 | 2.7 |
| PLVAP     | 1.5 | 1.7E-08 | 1.5 | 7.8E-09 | 1.5 | 2.7 |
| DRD4      | 1.2 | 2.4E-07 | 1.7 | 2.6E-11 | 1.5 | 2.7 |
| CASKIN1   | 1.2 | 2.7E-07 | 1.7 | 2.4E-11 | 1.5 | 2.7 |
| TBCE      | 1.6 | 2.4E-10 | 1.3 | 2.6E-08 | 1.5 | 2.7 |
| UBOX5     | 1.2 | 4.7E-07 | 1.8 | 1.6E-11 | 1.5 | 2.7 |
| WDR47     | 1.5 | 6.7E-09 | 1.4 | 2.7E-08 | 1.5 | 2.7 |
| FBXL2     | 1.5 | 4.6E-09 | 1.4 | 4.2E-09 | 1.5 | 2.7 |
| TRIM41    | 1.2 | 2.0E-06 | 1.7 | 3.6E-10 | 1.5 | 2.7 |
| CMIP      | 1.3 | 1.2E-07 | 1.6 | 3.1E-10 | 1.5 | 2.7 |
| USP9X     | 1.4 | 1.3E-08 | 1.5 | 5.2E-10 | 1.5 | 2.7 |
| CACNA2D2  | 1.3 | 4.4E-08 | 1.6 | 2.4E-10 | 1.5 | 2.7 |
| OR51L1    | 1.3 | 1.1E-07 | 1.6 | 1.6E-10 | 1.5 | 2.7 |
| PES1      | 1.1 | 6.2E-06 | 1.8 | 5.7E-12 | 1.4 | 2.7 |
| LOC653720 | 1.5 | 2.8E-09 | 1.4 | 6.9E-09 | 1.4 | 2.7 |
| PLXNA3    | 1.3 | 3.8E-04 | 1.6 | 3.2E-05 | 1.4 | 2.7 |
| ZBTB8A    | 1.5 | 1.3E-09 | 1.4 | 1.1E-08 | 1.4 | 2.7 |
| ADRA2C    | 1.5 | 9.1E-10 | 1.4 | 1.2E-08 | 1.4 | 2.7 |
| SPIN2B    | 1.4 | 5.0E-09 | 1.5 | 1.7E-09 | 1.4 | 2.7 |
| MTA2      | 1.4 | 4.5E-09 | 1.5 | 2.5E-09 | 1.4 | 2.7 |
| MYO10     | 1.5 | 8.0E-10 | 1.4 | 1.0E-08 | 1.4 | 2.7 |
| UMOD      | 1.3 | 2.7E-06 | 1.6 | 8.7E-10 | 1.4 | 2.7 |
| FAM124A   | 1.3 | 2.9E-05 | 1.6 | 2.0E-08 | 1.4 | 2.7 |
| TCERG1L   | 1.5 | 1.1E-09 | 1.4 | 1.4E-08 | 1.4 | 2.7 |
| HSP90AA1  | 1.5 | 2.1E-09 | 1.4 | 4.4E-09 | 1.4 | 2.7 |
| CCDC18    | 1.3 | 7.3E-07 | 1.5 | 6.0E-09 | 1.4 | 2.7 |
| SOST      | 1.8 | 2.1E-07 | 1.1 | 4.3E-04 | 1.4 | 2.7 |
| ENO3      | 1.6 | 2.8E-10 | 1.3 | 3.9E-08 | 1.4 | 2.7 |
| GLTSCR1   | 1.4 | 8.1E-09 | 1.5 | 1.2E-09 | 1.4 | 2.7 |
| RAB2B     | 1.5 | 1.0E-09 | 1.4 | 1.1E-08 | 1.4 | 2.7 |
| FOXF1     | 1.3 | 4.2E-08 | 1.6 | 4.1E-10 | 1.4 | 2.7 |
| PCDHB14   | 1.3 | 3.2E-08 | 1.5 | 1.0E-09 | 1.4 | 2.7 |
| CSRNP2    | 1.6 | 3.9E-10 | 1.3 | 3.7E-08 | 1.4 | 2.7 |
| HOXA10    | 1.2 | 2.0E-06 | 1.7 | 1.5E-09 | 1.4 | 2.7 |
| HOXA9     | 1.2 | 2.0E-06 | 1.7 | 1.5E-09 | 1.4 | 2.7 |
| PHF21A    | 1.6 | 3.3E-10 | 1.3 | 4.1E-08 | 1.4 | 2.7 |
| GFOD2     | 1.6 | 3.4E-10 | 1.3 | 4.7E-08 | 1.4 | 2.7 |
| LUC7L3    | 1.4 | 8.9E-09 | 1.5 | 1.4E-09 | 1.4 | 2.7 |
| TEP1      | 1.5 | 1.8E-09 | 1.4 | 8.2E-09 | 1.4 | 2.7 |
| TMC8      | 1.3 | 5.1E-08 | 1.6 | 2.9E-10 | 1.4 | 2.7 |
| DLEU1     | 1.3 | 1.7E-08 | 1.5 | 8.8E-10 | 1.4 | 2.7 |
| SGCB      | 1.4 | 9.0E-09 | 1.5 | 1.8E-09 | 1.4 | 2.7 |
| OPA3      | 1.1 | 1.5E-05 | 1.8 | 2.6E-11 | 1.4 | 2.7 |
| SRGAP2    | 1.4 | 7.1E-09 | 1.5 | 2.1E-09 | 1.4 | 2.7 |
| HNRNPA2B1 | 1.5 | 6.8E-10 | 1.3 | 2.3E-08 | 1.4 | 2.7 |
| ZFP2      | 1.6 | 1.2E-09 | 1.3 | 8.3E-08 | 1.4 | 2.7 |
| IKBIP     | 1.5 | 7.7E-10 | 1.3 | 5.9E-07 | 1.4 | 2.7 |
| COL5A2    | 1.5 | 7.5E-10 | 1.3 | 2.6E-08 | 1.4 | 2.7 |
| CDK5R2    | 1.2 | 6.0E-07 | 1.6 | 1.6E-10 | 1.4 | 2.7 |
| ABCC9     | 1.4 | 1.4E-08 | 1.5 | 1.3E-09 | 1.4 | 2.7 |
| SLC30A3   | 1.4 | 6.3E-06 | 1.4 | 2.5E-07 | 1.4 | 2.7 |
| HIST1H2AL | 1.6 | 2.2E-10 | 1.2 | 1.7E-07 | 1.4 | 2.7 |
| HIST3H2A  | 1.4 | 5.4E-09 | 1.4 | 3.6E-09 | 1.4 | 2.7 |
| BRSK2     | 1.5 | 3.9E-09 | 1.4 | 2.0E-08 | 1.4 | 2.7 |
| EMILIN3   | 1.1 | 2.0E-06 | 1.7 | 4.5E-11 | 1.4 | 2.7 |
| LHX1      | 1.3 | 2.0E-07 | 1.5 | 1.7E-09 | 1.4 | 2.7 |

|              |     |         |     |         |     |     |
|--------------|-----|---------|-----|---------|-----|-----|
| CD4          | 1.3 | 3.1E-08 | 1.5 | 9.9E-10 | 1.4 | 2.7 |
| PLGLB2       | 1.2 | 1.4E-06 | 1.6 | 1.6E-09 | 1.4 | 2.7 |
| KRTAP5-8     | 1.4 | 4.6E-08 | 1.5 | 3.1E-09 | 1.4 | 2.7 |
| MKL2         | 1.4 | 1.1E-08 | 1.5 | 2.3E-09 | 1.4 | 2.7 |
| CNOT8        | 1.5 | 1.8E-09 | 1.4 | 1.4E-08 | 1.4 | 2.7 |
| PIP5K1C      | 1.2 | 4.7E-07 | 1.7 | 6.8E-11 | 1.4 | 2.7 |
| MARCH9       | 1.3 | 1.8E-08 | 1.5 | 1.6E-09 | 1.4 | 2.7 |
| TBC1D3       | 1.4 | 1.5E-08 | 1.5 | 2.1E-09 | 1.4 | 2.7 |
| PTDSS2       | 1.2 | 1.2E-07 | 1.6 | 3.5E-10 | 1.4 | 2.7 |
| WNT5B        | 1.6 | 8.5E-10 | 1.2 | 2.7E-07 | 1.4 | 2.7 |
| ARHGEF15     | 1.2 | 4.9E-07 | 1.7 | 8.5E-11 | 1.4 | 2.7 |
| PPARG        | 1.6 | 2.6E-10 | 1.2 | 1.4E-07 | 1.4 | 2.7 |
| TNNI1        | 1.3 | 9.6E-07 | 1.5 | 1.1E-08 | 1.4 | 2.7 |
| HMG20B       | 1.5 | 1.1E-09 | 1.3 | 4.0E-08 | 1.4 | 2.7 |
| H6PD         | 1.3 | 4.3E-05 | 1.5 | 5.3E-09 | 1.4 | 2.6 |
| DTX3         | 1.2 | 1.8E-07 | 1.6 | 4.5E-10 | 1.4 | 2.6 |
| ZNF816       | 1.4 | 3.8E-09 | 1.4 | 1.2E-08 | 1.4 | 2.6 |
| OLFM1        | 1.5 | 2.8E-09 | 1.3 | 2.4E-08 | 1.4 | 2.6 |
| FCGR3A       | 1.4 | 5.9E-09 | 1.4 | 7.0E-09 | 1.4 | 2.6 |
| NME4         | 1.3 | 8.9E-08 | 1.5 | 5.3E-10 | 1.4 | 2.6 |
| PTPN20B      | 1.6 | 5.7E-09 | 1.2 | 7.0E-07 | 1.4 | 2.6 |
| HOXD10       | 1.5 | 2.4E-09 | 1.3 | 1.6E-07 | 1.4 | 2.6 |
| CACNG4       | 1.2 | 3.4E-04 | 1.6 | 1.1E-05 | 1.4 | 2.6 |
| GMFB         | 1.4 | 1.4E-08 | 1.4 | 2.3E-08 | 1.4 | 2.6 |
| G3BP1        | 1.4 | 3.9E-09 | 1.4 | 1.2E-08 | 1.4 | 2.6 |
| SLC4A10      | 1.4 | 8.1E-07 | 1.4 | 1.1E-08 | 1.4 | 2.6 |
| MAN2A2       | 1.5 | 5.7E-10 | 1.2 | 1.0E-07 | 1.4 | 2.6 |
| GH1          | 1.7 | 1.5E-06 | 1.1 | 1.3E-04 | 1.4 | 2.6 |
| NCRNA00257   | 1.0 | 1.6E-04 | 1.8 | 1.4E-10 | 1.4 | 2.6 |
| ZNF557       | 1.6 | 2.2E-09 | 1.2 | 1.4E-06 | 1.4 | 2.6 |
| CD96         | 1.3 | 8.2E-08 | 1.5 | 2.1E-09 | 1.4 | 2.6 |
| PNN          | 1.5 | 2.0E-09 | 1.3 | 3.1E-08 | 1.4 | 2.6 |
| PAFAH1B2     | 1.3 | 1.2E-07 | 1.5 | 5.8E-09 | 1.4 | 2.6 |
| HIST1H1E     | 1.5 | 1.2E-09 | 1.3 | 9.3E-08 | 1.4 | 2.6 |
| PPP1R1A      | 1.4 | 1.5E-08 | 1.4 | 4.9E-09 | 1.4 | 2.6 |
| LRR37A4      | 1.4 | 4.3E-09 | 1.3 | 2.0E-08 | 1.4 | 2.6 |
| CCL22        | 1.5 | 2.5E-09 | 1.3 | 2.9E-08 | 1.4 | 2.6 |
| ZNF146       | 1.6 | 3.9E-10 | 1.2 | 1.8E-07 | 1.4 | 2.6 |
| SCN9A        | 1.6 | 1.6E-07 | 1.2 | 1.6E-05 | 1.4 | 2.6 |
| PEX6         | 1.4 | 7.8E-09 | 1.4 | 1.7E-08 | 1.4 | 2.6 |
| TAOK2        | 1.2 | 5.5E-07 | 1.6 | 3.4E-10 | 1.4 | 2.6 |
| BMI1         | 1.4 | 6.1E-09 | 1.4 | 1.3E-08 | 1.4 | 2.6 |
| DKFZp547G183 | 1.6 | 6.8E-10 | 1.2 | 2.6E-07 | 1.4 | 2.6 |
| RHBDL1       | 1.2 | 3.6E-07 | 1.6 | 3.0E-10 | 1.4 | 2.6 |
| FKBP10       | 1.4 | 5.4E-09 | 1.3 | 1.7E-08 | 1.4 | 2.6 |
| GNB4         | 1.5 | 2.1E-08 | 1.2 | 6.9E-07 | 1.4 | 2.6 |
| VASH2        | 1.3 | 2.9E-07 | 1.5 | 6.7E-09 | 1.4 | 2.6 |
| CNTFR        | 1.3 | 5.0E-08 | 1.4 | 4.3E-09 | 1.4 | 2.6 |
| BHLHE22      | 1.3 | 7.1E-07 | 1.4 | 1.2E-08 | 1.4 | 2.6 |
| NFAM1        | 1.2 | 2.1E-07 | 1.5 | 6.4E-10 | 1.4 | 2.6 |
| KIF3A        | 1.3 | 3.4E-08 | 1.4 | 4.8E-09 | 1.4 | 2.6 |
| C3orf31      | 1.4 | 5.5E-09 | 1.3 | 2.0E-08 | 1.4 | 2.6 |
| RDM1         | 1.3 | 6.6E-07 | 1.4 | 4.8E-08 | 1.4 | 2.6 |
| SLC4A8       | 1.4 | 5.9E-05 | 1.3 | 4.7E-04 | 1.4 | 2.6 |
| LIN9         | 1.1 | 7.9E-06 | 1.6 | 4.0E-10 | 1.4 | 2.6 |
| CCDC93       | 1.4 | 1.3E-08 | 1.3 | 2.6E-08 | 1.4 | 2.6 |
| RARG         | 1.1 | 1.4E-04 | 1.6 | 4.8E-09 | 1.4 | 2.6 |
| MMP28        | 1.4 | 3.5E-09 | 1.3 | 5.2E-08 | 1.4 | 2.6 |
| UBL4A        | 1.3 | 3.5E-06 | 1.4 | 1.6E-08 | 1.4 | 2.6 |
| SARDH        | 1.1 | 2.0E-06 | 1.6 | 1.2E-10 | 1.4 | 2.6 |
| PRM2         | 1.3 | 3.0E-08 | 1.4 | 7.4E-09 | 1.4 | 2.6 |
| PRR7         | 1.5 | 1.6E-09 | 1.2 | 1.2E-07 | 1.4 | 2.6 |

|          |     |         |     |         |     |     |
|----------|-----|---------|-----|---------|-----|-----|
| EN2      | 1.4 | 6.8E-09 | 1.3 | 2.7E-08 | 1.4 | 2.6 |
| ZNF559   | 1.5 | 2.7E-07 | 1.2 | 8.2E-06 | 1.4 | 2.6 |
| LARS     | 1.5 | 2.5E-09 | 1.3 | 7.9E-08 | 1.4 | 2.6 |
| N4BP2    | 1.2 | 2.1E-07 | 1.5 | 1.3E-09 | 1.4 | 2.6 |
| AKIRIN1  | 1.4 | 3.0E-08 | 1.3 | 1.0E-07 | 1.4 | 2.6 |
| SEPT8    | 1.2 | 2.2E-06 | 1.5 | 1.3E-08 | 1.4 | 2.6 |
| ASMTLAS  | 1.5 | 1.3E-06 | 1.2 | 2.7E-05 | 1.4 | 2.6 |
| STK32C   | 1.5 | 8.0E-09 | 1.2 | 1.6E-06 | 1.4 | 2.6 |
| NBEA     | 1.5 | 8.8E-10 | 1.2 | 3.7E-07 | 1.4 | 2.6 |
| C10orf35 | 1.5 | 1.2E-09 | 1.2 | 2.1E-07 | 1.4 | 2.6 |
| PHAX     | 1.4 | 4.3E-09 | 1.3 | 5.2E-08 | 1.4 | 2.6 |
| RSPH6A   | 1.3 | 3.0E-06 | 1.4 | 1.3E-08 | 1.4 | 2.6 |
| ZCCHC11  | 1.4 | 5.1E-09 | 1.3 | 4.5E-08 | 1.4 | 2.6 |
| ADAMTS10 | 1.3 | 5.9E-07 | 1.4 | 1.3E-08 | 1.4 | 2.6 |
| SCG5     | 1.3 | 1.6E-07 | 1.4 | 5.9E-09 | 1.4 | 2.6 |
| ZNF555   | 1.3 | 4.2E-08 | 1.4 | 8.6E-09 | 1.4 | 2.6 |
| C6orf162 | 1.2 | 1.6E-07 | 1.5 | 2.2E-09 | 1.4 | 2.6 |
| ZFYVE9   | 1.5 | 7.8E-09 | 1.2 | 5.4E-07 | 1.3 | 2.5 |
| RTN2     | 1.6 | 9.8E-10 | 1.1 | 2.3E-06 | 1.3 | 2.5 |
| F3       | 1.5 | 1.1E-09 | 1.2 | 6.4E-07 | 1.3 | 2.5 |
| KIF2A    | 1.4 | 1.4E-08 | 1.3 | 1.9E-08 | 1.3 | 2.5 |
| CUX1     | 1.2 | 1.4E-07 | 1.5 | 2.0E-09 | 1.3 | 2.5 |
| ZNF652   | 1.4 | 1.3E-08 | 1.3 | 2.4E-08 | 1.3 | 2.5 |
| EPHA8    | 1.2 | 3.0E-07 | 1.5 | 1.0E-09 | 1.3 | 2.5 |
| HNRNPA0  | 1.5 | 2.1E-09 | 1.2 | 1.7E-07 | 1.3 | 2.5 |
| KCNJ14   | 1.4 | 6.3E-09 | 1.3 | 6.4E-08 | 1.3 | 2.5 |
| HCRTR1   | 1.2 | 1.7E-06 | 1.5 | 1.8E-09 | 1.3 | 2.5 |
| POMT1    | 1.4 | 9.6E-09 | 1.3 | 4.1E-08 | 1.3 | 2.5 |
| PPM1J    | 1.4 | 1.6E-07 | 1.3 | 6.0E-07 | 1.3 | 2.5 |
| SFXN1    | 1.5 | 1.0E-08 | 1.1 | 3.8E-06 | 1.3 | 2.5 |
| ELMO1    | 1.1 | 6.1E-05 | 1.5 | 1.5E-07 | 1.3 | 2.5 |
| CRYM     | 1.3 | 4.9E-08 | 1.4 | 1.6E-08 | 1.3 | 2.5 |
| GAGE4    | 1.3 | 5.8E-07 | 1.4 | 1.4E-08 | 1.3 | 2.5 |
| HBQ1     | 1.5 | 2.7E-08 | 1.1 | 2.1E-06 | 1.3 | 2.5 |
| ADAMDEC1 | 1.6 | 8.1E-10 | 1.1 | 1.2E-06 | 1.3 | 2.5 |
| MMD      | 1.2 | 1.2E-07 | 1.4 | 3.7E-09 | 1.3 | 2.5 |
| ZNF334   | 1.5 | 9.8E-10 | 1.1 | 7.1E-07 | 1.3 | 2.5 |
| SNHG7    | 1.5 | 6.7E-08 | 1.1 | 1.0E-05 | 1.3 | 2.5 |
| HEATR3   | 1.5 | 2.3E-09 | 1.2 | 1.8E-07 | 1.3 | 2.5 |
| NRN1     | 1.2 | 3.2E-07 | 1.5 | 1.5E-09 | 1.3 | 2.5 |
| STMN4    | 1.1 | 2.6E-06 | 1.6 | 1.9E-10 | 1.3 | 2.5 |
| FRMD1    | 1.1 | 1.8E-05 | 1.6 | 6.8E-10 | 1.3 | 2.5 |
| ATXN2L   | 1.2 | 2.9E-04 | 1.5 | 1.1E-07 | 1.3 | 2.5 |
| PRICKLE4 | 1.4 | 2.9E-09 | 1.2 | 1.6E-07 | 1.3 | 2.5 |
| SIAH1    | 1.4 | 3.5E-09 | 1.2 | 1.7E-07 | 1.3 | 2.5 |
| ZNF23    | 1.6 | 5.0E-10 | 1.1 | 1.2E-06 | 1.3 | 2.5 |
| CADPS2   | 1.3 | 1.4E-06 | 1.4 | 2.8E-07 | 1.3 | 2.5 |
| LIPA     | 1.4 | 1.2E-08 | 1.3 | 4.6E-08 | 1.3 | 2.5 |
| ZNF397   | 1.5 | 3.0E-09 | 1.2 | 3.7E-07 | 1.3 | 2.5 |
| EPHA3    | 1.2 | 5.5E-06 | 1.4 | 3.8E-08 | 1.3 | 2.5 |
| NOP10    | 1.2 | 1.5E-07 | 1.4 | 3.8E-09 | 1.3 | 2.5 |
| CSNK1G3  | 1.4 | 1.7E-08 | 1.2 | 2.3E-07 | 1.3 | 2.5 |
| RTN4RL2  | 1.0 | 7.0E-05 | 1.7 | 3.5E-10 | 1.3 | 2.5 |
| LRRC40   | 1.3 | 3.4E-08 | 1.3 | 2.6E-08 | 1.3 | 2.5 |
| SPG7     | 1.4 | 1.4E-08 | 1.3 | 4.4E-08 | 1.3 | 2.5 |
| C3orf51  | 1.3 | 9.0E-07 | 1.4 | 1.1E-08 | 1.3 | 2.5 |
| CD3E     | 1.2 | 2.8E-06 | 1.4 | 1.2E-08 | 1.3 | 2.5 |
| RTCD1    | 1.2 | 2.3E-07 | 1.4 | 2.8E-09 | 1.3 | 2.5 |
| MED13L   | 1.4 | 6.6E-09 | 1.2 | 9.7E-08 | 1.3 | 2.5 |
| LMNB1    | 1.4 | 1.6E-08 | 1.3 | 4.7E-08 | 1.3 | 2.5 |
| DCHS1    | 1.4 | 1.3E-08 | 1.3 | 5.0E-08 | 1.3 | 2.5 |
| WRB      | 1.2 | 1.5E-07 | 1.4 | 4.8E-09 | 1.3 | 2.5 |

|           |     |         |     |         |     |     |
|-----------|-----|---------|-----|---------|-----|-----|
| PSPC1     | 1.4 | 4.2E-09 | 1.2 | 1.8E-07 | 1.3 | 2.5 |
| RHO       | 1.1 | 2.3E-06 | 1.6 | 3.9E-10 | 1.3 | 2.5 |
| THRAP3    | 1.3 | 2.4E-06 | 1.3 | 1.6E-06 | 1.3 | 2.5 |
| TMEM206   | 1.3 | 2.5E-08 | 1.3 | 4.7E-08 | 1.3 | 2.5 |
| PTGR2     | 1.4 | 5.2E-08 | 1.3 | 1.8E-07 | 1.3 | 2.5 |
| SP100     | 1.2 | 4.0E-07 | 1.4 | 8.5E-09 | 1.3 | 2.5 |
| PAPPA     | 1.5 | 8.6E-06 | 1.1 | 7.3E-04 | 1.3 | 2.5 |
| SLC35F2   | 0.9 | 8.5E-05 | 1.8 | 4.8E-09 | 1.3 | 2.5 |
| MSI1      | 1.2 | 7.8E-04 | 1.4 | 3.8E-08 | 1.3 | 2.5 |
| UBTD2     | 1.4 | 3.6E-08 | 1.3 | 8.9E-08 | 1.3 | 2.5 |
| TNFRSF9   | 1.2 | 3.6E-04 | 1.5 | 5.0E-06 | 1.3 | 2.5 |
| ZNF578    | 1.5 | 2.8E-09 | 1.2 | 4.9E-07 | 1.3 | 2.5 |
| NKD2      | 1.3 | 1.1E-06 | 1.4 | 5.1E-08 | 1.3 | 2.5 |
| CRYGS     | 1.4 | 1.5E-08 | 1.3 | 6.5E-08 | 1.3 | 2.5 |
| EYA2      | 1.5 | 2.9E-09 | 1.1 | 8.2E-07 | 1.3 | 2.5 |
| TMEM133   | 1.4 | 4.0E-08 | 1.3 | 1.1E-07 | 1.3 | 2.5 |
| CELF5     | 1.2 | 2.0E-05 | 1.5 | 3.8E-08 | 1.3 | 2.5 |
| GPRIN2    | 1.5 | 1.8E-09 | 1.1 | 6.4E-07 | 1.3 | 2.5 |
| SLC35D1   | 1.2 | 1.1E-05 | 1.4 | 1.2E-07 | 1.3 | 2.5 |
| PDZD7     | 1.1 | 6.6E-07 | 1.5 | 1.6E-09 | 1.3 | 2.5 |
| LIMD2     | 1.1 | 6.8E-07 | 1.5 | 1.7E-09 | 1.3 | 2.5 |
| KIF1C     | 1.1 | 1.3E-06 | 1.5 | 8.8E-10 | 1.3 | 2.5 |
| LRRC8B    | 1.4 | 1.5E-08 | 1.2 | 2.6E-07 | 1.3 | 2.5 |
| CSPP1     | 1.4 | 4.8E-09 | 1.2 | 3.5E-07 | 1.3 | 2.5 |
| RILPL1    | 1.2 | 5.5E-07 | 1.4 | 6.5E-09 | 1.3 | 2.5 |
| OR4K5     | 1.3 | 6.4E-07 | 1.3 | 9.5E-08 | 1.3 | 2.5 |
| MEMO1     | 1.4 | 3.0E-09 | 1.2 | 3.9E-07 | 1.3 | 2.5 |
| UXS1      | 1.4 | 5.2E-09 | 1.2 | 2.4E-07 | 1.3 | 2.5 |
| CWC27     | 1.4 | 1.5E-08 | 1.3 | 8.0E-08 | 1.3 | 2.5 |
| NUDCD2    | 1.4 | 5.6E-09 | 1.2 | 2.2E-07 | 1.3 | 2.5 |
| RAD52     | 1.6 | 9.1E-10 | 1.1 | 4.0E-06 | 1.3 | 2.5 |
| CD101     | 1.3 | 4.5E-05 | 1.3 | 1.7E-05 | 1.3 | 2.5 |
| UGT2B11   | 0.8 | 7.3E-04 | 1.8 | 5.1E-05 | 1.3 | 2.5 |
| B3GALNT1  | 1.4 | 7.0E-09 | 1.2 | 2.5E-07 | 1.3 | 2.5 |
| BMP2      | 1.2 | 5.4E-07 | 1.4 | 4.2E-09 | 1.3 | 2.5 |
| MUM1      | 1.4 | 1.4E-08 | 1.2 | 1.1E-07 | 1.3 | 2.5 |
| TPD52L1   | 1.4 | 8.4E-09 | 1.2 | 1.8E-07 | 1.3 | 2.5 |
| PRR11     | 1.1 | 1.0E-06 | 1.5 | 1.6E-09 | 1.3 | 2.5 |
| ADAMTS13  | 1.4 | 3.6E-09 | 1.2 | 4.8E-07 | 1.3 | 2.5 |
| HIST1H2AI | 1.3 | 8.2E-08 | 1.3 | 4.2E-08 | 1.3 | 2.5 |
| KCND1     | 1.4 | 4.3E-07 | 1.2 | 3.7E-06 | 1.3 | 2.5 |
| CYP46A1   | 1.2 | 2.4E-05 | 1.3 | 8.2E-08 | 1.3 | 2.5 |
| TREH      | 1.4 | 1.5E-05 | 1.2 | 7.8E-06 | 1.3 | 2.5 |
| POLI      | 1.2 | 1.3E-07 | 1.4 | 1.5E-08 | 1.3 | 2.5 |
| SRPX2     | 1.5 | 2.5E-09 | 1.1 | 9.4E-07 | 1.3 | 2.4 |
| RAPGEF2   | 1.2 | 1.8E-07 | 1.4 | 1.1E-08 | 1.3 | 2.4 |
| CITED1    | 1.3 | 1.9E-08 | 1.2 | 1.1E-07 | 1.3 | 2.4 |
| MS4A14    | 1.6 | 1.2E-08 | 1.0 | 5.1E-05 | 1.3 | 2.4 |
| SCGB3A2   | 1.3 | 5.1E-08 | 1.3 | 6.9E-08 | 1.3 | 2.4 |
| NIP7      | 1.4 | 7.8E-09 | 1.2 | 2.8E-07 | 1.3 | 2.4 |
| PPAPDC1B  | 1.1 | 4.3E-06 | 1.5 | 4.5E-09 | 1.3 | 2.4 |
| ZSCAN20   | 1.2 | 1.5E-07 | 1.3 | 2.6E-08 | 1.3 | 2.4 |
| HEXIM1    | 1.3 | 2.1E-08 | 1.2 | 9.9E-08 | 1.3 | 2.4 |
| RHBDL3    | 1.3 | 7.2E-07 | 1.3 | 6.8E-07 | 1.3 | 2.4 |
| XPR1      | 1.6 | 7.8E-09 | 1.0 | 5.5E-05 | 1.3 | 2.4 |
| SPINK7    | 1.3 | 2.2E-07 | 1.3 | 5.4E-08 | 1.3 | 2.4 |
| EMX1      | 1.1 | 3.5E-06 | 1.5 | 2.2E-09 | 1.3 | 2.4 |
| LBX1      | 1.1 | 2.9E-06 | 1.5 | 8.7E-10 | 1.3 | 2.4 |
| LRRC46    | 1.3 | 1.8E-05 | 1.3 | 8.7E-06 | 1.3 | 2.4 |
| ZNF606    | 1.2 | 2.0E-07 | 1.3 | 2.2E-08 | 1.3 | 2.4 |
| PANX3     | 1.2 | 4.9E-05 | 1.4 | 1.5E-07 | 1.3 | 2.4 |
| STK36     | 1.2 | 4.3E-07 | 1.4 | 7.0E-09 | 1.3 | 2.4 |

|           |     |         |     |         |     |     |
|-----------|-----|---------|-----|---------|-----|-----|
| GNPAT     | 1.2 | 5.1E-07 | 1.4 | 6.1E-09 | 1.3 | 2.4 |
| RCE1      | 1.3 | 1.8E-07 | 1.2 | 2.6E-05 | 1.3 | 2.4 |
| GNAI3     | 1.3 | 3.4E-08 | 1.2 | 1.7E-07 | 1.3 | 2.4 |
| SYNGR3    | 1.2 | 2.5E-06 | 1.4 | 5.6E-08 | 1.3 | 2.4 |
| KCTD15    | 1.2 | 6.3E-07 | 1.4 | 2.1E-08 | 1.3 | 2.4 |
| NAT14     | 1.2 | 1.4E-07 | 1.3 | 2.6E-08 | 1.3 | 2.4 |
| KDM5B     | 1.3 | 3.3E-08 | 1.2 | 1.0E-07 | 1.3 | 2.4 |
| SS18L1    | 1.4 | 5.0E-09 | 1.1 | 7.4E-07 | 1.3 | 2.4 |
| RANBP17   | 1.5 | 1.4E-08 | 1.1 | 3.9E-06 | 1.3 | 2.4 |
| NAB2      | 1.2 | 1.0E-07 | 1.3 | 3.4E-08 | 1.3 | 2.4 |
| PPAP2C    | 1.3 | 1.0E-07 | 1.3 | 4.1E-08 | 1.3 | 2.4 |
| SYT17     | 1.6 | 4.4E-09 | 0.9 | 2.3E-04 | 1.3 | 2.4 |
| MTA1      | 1.3 | 1.9E-08 | 1.2 | 1.8E-07 | 1.3 | 2.4 |
| PLRG1     | 1.3 | 2.5E-08 | 1.2 | 1.5E-07 | 1.3 | 2.4 |
| OR2B11    | 1.1 | 1.8E-04 | 1.5 | 7.5E-09 | 1.3 | 2.4 |
| ZNF155    | 1.5 | 1.5E-08 | 1.1 | 6.4E-06 | 1.3 | 2.4 |
| ID4       | 1.4 | 1.5E-08 | 1.2 | 2.4E-07 | 1.3 | 2.4 |
| ACYP1     | 1.3 | 6.1E-08 | 1.3 | 6.2E-08 | 1.3 | 2.4 |
| DOK6      | 1.2 | 1.6E-07 | 1.3 | 2.4E-08 | 1.3 | 2.4 |
| SCRN1     | 1.4 | 7.0E-09 | 1.2 | 5.4E-07 | 1.3 | 2.4 |
| ETV4      | 1.3 | 5.2E-08 | 1.3 | 8.8E-08 | 1.3 | 2.4 |
| MEF2D     | 1.3 | 8.0E-08 | 1.3 | 1.1E-07 | 1.3 | 2.4 |
| CDH22     | 1.2 | 6.8E-07 | 1.4 | 1.3E-08 | 1.3 | 2.4 |
| BYSL      | 1.2 | 1.2E-07 | 1.3 | 3.3E-08 | 1.3 | 2.4 |
| ARL14     | 1.3 | 7.1E-06 | 1.2 | 1.3E-04 | 1.3 | 2.4 |
| DONSON    | 1.3 | 2.4E-08 | 1.2 | 1.7E-07 | 1.3 | 2.4 |
| COG7      | 1.3 | 7.4E-08 | 1.3 | 7.8E-08 | 1.3 | 2.4 |
| SLC22A11  | 1.2 | 2.1E-05 | 1.3 | 4.1E-07 | 1.3 | 2.4 |
| OXER1     | 1.2 | 4.4E-05 | 1.3 | 9.9E-08 | 1.3 | 2.4 |
| C10orf27  | 1.2 | 4.4E-06 | 1.4 | 2.8E-08 | 1.3 | 2.4 |
| TMEM130   | 1.3 | 8.8E-08 | 1.2 | 1.9E-07 | 1.3 | 2.4 |
| SPOCD1    | 1.4 | 1.6E-08 | 1.2 | 4.2E-07 | 1.3 | 2.4 |
| SPAST     | 1.1 | 2.6E-05 | 1.4 | 6.2E-08 | 1.3 | 2.4 |
| CCDC14    | 1.2 | 3.6E-07 | 1.4 | 1.5E-08 | 1.3 | 2.4 |
| TARBP1    | 1.4 | 2.7E-09 | 1.1 | 2.0E-06 | 1.3 | 2.4 |
| UBE2G1    | 1.3 | 2.0E-08 | 1.2 | 2.8E-07 | 1.3 | 2.4 |
| HIST1H2AH | 1.2 | 1.3E-07 | 1.3 | 4.2E-08 | 1.3 | 2.4 |
| C1orf158  | 1.2 | 9.5E-07 | 1.4 | 1.7E-08 | 1.3 | 2.4 |
| OR4D2     | 1.1 | 9.3E-06 | 1.5 | 4.1E-09 | 1.3 | 2.4 |
| SLC39A6   | 1.3 | 8.7E-08 | 1.3 | 7.8E-08 | 1.3 | 2.4 |
| SS18L2    | 1.3 | 8.6E-08 | 1.3 | 6.7E-08 | 1.3 | 2.4 |
| BOLL      | 1.2 | 1.0E-06 | 1.4 | 2.1E-08 | 1.3 | 2.4 |
| MPHOSPH6  | 1.3 | 2.6E-08 | 1.2 | 2.5E-07 | 1.3 | 2.4 |
| DEPDC7    | 1.4 | 1.5E-08 | 1.1 | 1.8E-06 | 1.3 | 2.4 |
| TRNAU1AP  | 1.3 | 3.4E-08 | 1.2 | 1.9E-07 | 1.3 | 2.4 |
| POLR3E    | 1.1 | 6.5E-07 | 1.4 | 1.0E-08 | 1.3 | 2.4 |
| CELSR1    | 1.2 | 1.2E-07 | 1.3 | 8.2E-08 | 1.3 | 2.4 |
| LIN7B     | 1.1 | 6.7E-07 | 1.4 | 1.3E-08 | 1.3 | 2.4 |
| GIPR      | 1.4 | 1.3E-06 | 1.2 | 4.2E-06 | 1.3 | 2.4 |
| HCFC2     | 1.1 | 1.3E-06 | 1.4 | 1.9E-08 | 1.3 | 2.4 |
| PACS1     | 1.0 | 9.9E-06 | 1.5 | 2.7E-09 | 1.3 | 2.4 |
| DMWD      | 1.1 | 2.7E-06 | 1.4 | 4.3E-09 | 1.3 | 2.4 |
| FKBP3     | 1.4 | 1.2E-08 | 1.1 | 6.4E-07 | 1.3 | 2.4 |
| ELMO3     | 0.9 | 4.2E-05 | 1.6 | 2.7E-10 | 1.3 | 2.4 |
| RNF145    | 1.3 | 3.7E-08 | 1.2 | 2.0E-07 | 1.3 | 2.4 |
| C19orf61  | 0.9 | 9.1E-05 | 1.6 | 9.5E-10 | 1.3 | 2.4 |
| DLX5      | 1.1 | 9.3E-06 | 1.4 | 1.7E-08 | 1.3 | 2.4 |
| C17orf39  | 1.4 | 2.4E-08 | 1.1 | 2.5E-06 | 1.3 | 2.4 |
| HTR2B     | 1.1 | 6.8E-04 | 1.4 | 1.4E-05 | 1.3 | 2.4 |
| RAX2      | 1.1 | 1.3E-06 | 1.4 | 6.7E-09 | 1.2 | 2.4 |
| TRIM2     | 1.2 | 2.3E-07 | 1.3 | 3.8E-08 | 1.2 | 2.4 |
| ADAM33    | 1.1 | 3.1E-05 | 1.3 | 1.5E-07 | 1.2 | 2.4 |

|            |     |         |     |         |     |     |
|------------|-----|---------|-----|---------|-----|-----|
| PLCG1      | 1.5 | 3.8E-09 | 1.0 | 5.0E-06 | 1.2 | 2.4 |
| MTERFD3    | 1.4 | 3.5E-09 | 1.1 | 2.9E-06 | 1.2 | 2.4 |
| HN1        | 1.2 | 1.0E-07 | 1.3 | 8.7E-08 | 1.2 | 2.4 |
| LRFN3      | 1.4 | 1.2E-08 | 1.1 | 7.4E-07 | 1.2 | 2.4 |
| PGRMC1     | 1.3 | 4.3E-08 | 1.2 | 2.2E-07 | 1.2 | 2.4 |
| PRPF39     | 1.3 | 1.6E-08 | 1.1 | 5.9E-07 | 1.2 | 2.4 |
| SPATS2     | 1.2 | 1.3E-07 | 1.2 | 1.2E-07 | 1.2 | 2.4 |
| SMAD2      | 1.3 | 1.6E-08 | 1.1 | 6.2E-07 | 1.2 | 2.4 |
| PLXNA1     | 1.3 | 7.8E-08 | 1.2 | 1.3E-07 | 1.2 | 2.4 |
| PAPOLG     | 1.3 | 3.2E-08 | 1.2 | 5.9E-07 | 1.2 | 2.4 |
| MICAL1     | 1.3 | 4.1E-08 | 1.2 | 5.0E-07 | 1.2 | 2.4 |
| GHSR       | 0.9 | 3.4E-04 | 1.6 | 2.6E-10 | 1.2 | 2.4 |
| SC4MOL     | 1.4 | 1.4E-08 | 1.1 | 3.2E-06 | 1.2 | 2.4 |
| PRDM10     | 1.3 | 6.1E-08 | 1.2 | 2.7E-07 | 1.2 | 2.4 |
| C5orf30    | 1.4 | 1.5E-08 | 1.1 | 9.0E-07 | 1.2 | 2.4 |
| C14orf169  | 1.4 | 1.2E-08 | 1.1 | 1.1E-06 | 1.2 | 2.4 |
| TARDBP     | 1.2 | 1.9E-07 | 1.3 | 6.7E-08 | 1.2 | 2.4 |
| MANF       | 1.1 | 5.7E-07 | 1.3 | 2.2E-08 | 1.2 | 2.4 |
| C14orf179  | 1.3 | 3.5E-08 | 1.2 | 4.0E-07 | 1.2 | 2.4 |
| GPR137C    | 1.0 | 1.4E-04 | 1.4 | 2.5E-06 | 1.2 | 2.4 |
| SV2A       | 1.0 | 1.1E-05 | 1.4 | 7.7E-09 | 1.2 | 2.4 |
| GFM2       | 1.2 | 1.1E-07 | 1.2 | 1.3E-07 | 1.2 | 2.4 |
| IL17RE     | 1.0 | 6.3E-05 | 1.5 | 2.2E-09 | 1.2 | 2.4 |
| CLEC4E     | 1.2 | 9.3E-07 | 1.3 | 1.6E-07 | 1.2 | 2.4 |
| SUV420H2   | 1.2 | 9.6E-08 | 1.2 | 1.6E-07 | 1.2 | 2.4 |
| CD79A      | 0.9 | 3.3E-05 | 1.5 | 6.6E-10 | 1.2 | 2.3 |
| KIAA0562   | 1.3 | 2.0E-08 | 1.1 | 1.0E-06 | 1.2 | 2.3 |
| AKIRIN2    | 1.2 | 3.1E-07 | 1.3 | 5.6E-08 | 1.2 | 2.3 |
| OR4D5      | 1.1 | 6.5E-05 | 1.3 | 2.8E-07 | 1.2 | 2.3 |
| NCS1       | 1.2 | 2.6E-07 | 1.3 | 8.0E-08 | 1.2 | 2.3 |
| LIG4       | 1.3 | 1.3E-07 | 1.1 | 6.0E-06 | 1.2 | 2.3 |
| POM121     | 1.2 | 9.5E-06 | 1.3 | 8.2E-07 | 1.2 | 2.3 |
| ARHGAP8    | 1.1 | 1.1E-06 | 1.3 | 1.7E-08 | 1.2 | 2.3 |
| SLC17A7    | 1.1 | 1.7E-06 | 1.3 | 4.5E-08 | 1.2 | 2.3 |
| FAM59A     | 1.1 | 2.2E-06 | 1.4 | 9.6E-09 | 1.2 | 2.3 |
| EML1       | 1.3 | 5.0E-08 | 1.2 | 4.9E-07 | 1.2 | 2.3 |
| C17orf68   | 1.4 | 6.2E-09 | 1.0 | 5.6E-06 | 1.2 | 2.3 |
| NCRNA00085 | 1.1 | 2.7E-06 | 1.3 | 7.5E-08 | 1.2 | 2.3 |
| IKBKAP     | 1.2 | 1.2E-07 | 1.2 | 1.7E-07 | 1.2 | 2.3 |
| ALG12      | 1.0 | 1.6E-05 | 1.4 | 9.7E-09 | 1.2 | 2.3 |
| ZC3HAV1L   | 1.0 | 4.4E-05 | 1.4 | 1.0E-08 | 1.2 | 2.3 |
| IGF2BP1    | 1.3 | 5.1E-08 | 1.2 | 4.3E-07 | 1.2 | 2.3 |
| P4HA3      | 1.3 | 4.7E-08 | 1.1 | 2.1E-06 | 1.2 | 2.3 |
| DIP2B      | 1.2 | 8.3E-07 | 1.3 | 6.4E-08 | 1.2 | 2.3 |
| AMBRA1     | 1.1 | 1.1E-04 | 1.3 | 6.8E-07 | 1.2 | 2.3 |
| ZNF546     | 1.4 | 2.9E-06 | 1.0 | 1.4E-04 | 1.2 | 2.3 |
| CBX5       | 1.2 | 1.3E-07 | 1.2 | 3.3E-07 | 1.2 | 2.3 |
| PRAM1      | 1.2 | 9.8E-07 | 1.3 | 8.4E-08 | 1.2 | 2.3 |
| HOXC13     | 1.4 | 1.2E-08 | 1.0 | 8.7E-06 | 1.2 | 2.3 |
| POGLUT1    | 1.3 | 7.4E-08 | 1.2 | 4.0E-07 | 1.2 | 2.3 |
| VAR2       | 1.2 | 1.2E-07 | 1.2 | 2.2E-07 | 1.2 | 2.3 |
| SOX5       | 1.3 | 4.8E-08 | 1.1 | 2.0E-06 | 1.2 | 2.3 |
| FAIM3      | 1.1 | 1.6E-04 | 1.3 | 1.8E-07 | 1.2 | 2.3 |
| IVNS1ABP   | 1.3 | 3.6E-08 | 1.1 | 8.0E-07 | 1.2 | 2.3 |
| ADAMTSL4   | 1.2 | 4.4E-07 | 1.2 | 1.3E-07 | 1.2 | 2.3 |
| TNC        | 1.2 | 1.5E-07 | 1.2 | 2.2E-07 | 1.2 | 2.3 |
| TMX3       | 1.4 | 1.2E-08 | 1.0 | 1.9E-05 | 1.2 | 2.3 |
| OR11L1     | 0.9 | 1.4E-04 | 1.5 | 1.6E-09 | 1.2 | 2.3 |
| ITGA6      | 1.3 | 3.2E-08 | 1.1 | 9.9E-07 | 1.2 | 2.3 |
| MAPK7      | 1.1 | 7.5E-07 | 1.3 | 4.5E-08 | 1.2 | 2.3 |
| TTC3       | 1.2 | 1.9E-07 | 1.2 | 1.7E-07 | 1.2 | 2.3 |
| HES4       | 1.2 | 3.3E-07 | 1.2 | 1.0E-07 | 1.2 | 2.3 |

|          |     |         |     |         |     |     |
|----------|-----|---------|-----|---------|-----|-----|
| KCNC4    | 1.1 | 9.8E-06 | 1.3 | 1.5E-07 | 1.2 | 2.3 |
| METTL3   | 1.3 | 6.1E-08 | 1.1 | 1.2E-06 | 1.2 | 2.3 |
| HIRA     | 1.1 | 6.3E-07 | 1.3 | 5.6E-08 | 1.2 | 2.3 |
| MPDZ     | 1.4 | 1.8E-08 | 1.1 | 3.0E-06 | 1.2 | 2.3 |
| HAVCR2   | 1.3 | 2.9E-08 | 1.1 | 1.6E-06 | 1.2 | 2.3 |
| ZNF415   | 1.3 | 1.1E-07 | 1.2 | 6.8E-07 | 1.2 | 2.3 |
| DYNC1L1  | 1.4 | 1.3E-08 | 1.1 | 3.4E-06 | 1.2 | 2.3 |
| NFIB     | 1.3 | 4.9E-08 | 1.1 | 8.1E-07 | 1.2 | 2.3 |
| PSS5A    | 1.1 | 5.7E-07 | 1.3 | 6.6E-08 | 1.2 | 2.3 |
| ACIN1    | 1.2 | 2.5E-07 | 1.2 | 1.5E-07 | 1.2 | 2.3 |
| PIP5K1A  | 1.3 | 8.8E-08 | 1.2 | 4.5E-07 | 1.2 | 2.3 |
| TMEM136  | 1.3 | 6.3E-08 | 1.1 | 6.7E-07 | 1.2 | 2.3 |
| PYGL     | 1.4 | 1.1E-08 | 1.0 | 3.8E-06 | 1.2 | 2.3 |
| LPPR4    | 1.2 | 2.1E-05 | 1.2 | 1.6E-06 | 1.2 | 2.3 |
| SLC2A11  | 1.1 | 2.3E-05 | 1.3 | 7.8E-07 | 1.2 | 2.3 |
| FAM172A  | 1.0 | 1.6E-05 | 1.4 | 7.7E-09 | 1.2 | 2.3 |
| ZNF219   | 1.1 | 1.2E-06 | 1.3 | 3.3E-08 | 1.2 | 2.3 |
| DNAJA1   | 1.2 | 1.1E-07 | 1.2 | 3.7E-07 | 1.2 | 2.3 |
| C3AR1    | 1.0 | 1.8E-05 | 1.4 | 8.1E-09 | 1.2 | 2.3 |
| SYNGR4   | 1.1 | 3.1E-05 | 1.3 | 6.5E-07 | 1.2 | 2.3 |
| USP1     | 1.1 | 1.9E-06 | 1.3 | 2.3E-08 | 1.2 | 2.3 |
| LHB      | 1.0 | 1.4E-05 | 1.4 | 5.7E-09 | 1.2 | 2.3 |
| RTN3     | 1.2 | 5.1E-07 | 1.3 | 9.1E-08 | 1.2 | 2.3 |
| GFRA3    | 1.0 | 4.3E-04 | 1.4 | 7.3E-07 | 1.2 | 2.3 |
| PTCD2    | 1.2 | 2.6E-07 | 1.2 | 2.7E-07 | 1.2 | 2.3 |
| ARHGEF9  | 1.2 | 4.4E-07 | 1.2 | 1.3E-07 | 1.2 | 2.3 |
| ZNF285   | 1.1 | 1.2E-06 | 1.3 | 9.2E-08 | 1.2 | 2.3 |
| PRRX2    | 1.4 | 7.6E-09 | 1.0 | 8.3E-06 | 1.2 | 2.3 |
| NOL3     | 1.3 | 2.3E-08 | 1.1 | 2.4E-06 | 1.2 | 2.3 |
| OR6V1    | 0.9 | 1.1E-04 | 1.4 | 8.7E-09 | 1.2 | 2.3 |
| PSMB5    | 1.3 | 6.2E-08 | 1.1 | 9.3E-07 | 1.2 | 2.3 |
| CCDC46   | 1.4 | 5.6E-08 | 1.0 | 6.8E-06 | 1.2 | 2.3 |
| KIF1B    | 1.2 | 1.6E-07 | 1.2 | 4.1E-07 | 1.2 | 2.3 |
| UBASH3B  | 1.2 | 3.4E-06 | 1.2 | 7.5E-07 | 1.2 | 2.3 |
| VPS13B   | 1.6 | 3.5E-07 | 0.8 | 2.7E-04 | 1.2 | 2.3 |
| FBXO44   | 1.1 | 9.4E-07 | 1.3 | 6.9E-08 | 1.2 | 2.3 |
| CAPN13   | 1.0 | 1.7E-04 | 1.4 | 3.3E-07 | 1.2 | 2.3 |
| SFI1     | 1.3 | 3.5E-08 | 1.1 | 1.9E-06 | 1.2 | 2.3 |
| KLC3     | 1.6 | 4.4E-10 | 0.8 | 1.4E-04 | 1.2 | 2.3 |
| MTMR9    | 1.2 | 2.3E-07 | 1.1 | 1.3E-06 | 1.2 | 2.3 |
| SYN2     | 1.2 | 1.2E-06 | 1.2 | 2.1E-07 | 1.2 | 2.3 |
| POLH     | 1.3 | 4.7E-08 | 1.1 | 1.5E-06 | 1.2 | 2.3 |
| SSBP2    | 1.2 | 2.8E-07 | 1.2 | 3.3E-07 | 1.2 | 2.3 |
| ACADVL   | 1.2 | 2.8E-07 | 1.2 | 2.8E-07 | 1.2 | 2.3 |
| CHFR     | 1.3 | 4.8E-08 | 1.1 | 1.7E-06 | 1.2 | 2.3 |
| CLUL1    | 1.3 | 1.1E-05 | 1.1 | 4.7E-05 | 1.2 | 2.3 |
| ZNF8     | 1.2 | 3.0E-07 | 1.2 | 5.7E-07 | 1.2 | 2.3 |
| E2F3     | 1.1 | 6.1E-07 | 1.2 | 1.4E-07 | 1.2 | 2.3 |
| UNC13B   | 1.2 | 2.4E-07 | 1.1 | 8.3E-07 | 1.2 | 2.3 |
| ZNF446   | 0.9 | 8.7E-05 | 1.5 | 9.3E-10 | 1.2 | 2.3 |
| HSD11B1L | 1.1 | 6.2E-06 | 1.3 | 1.5E-07 | 1.2 | 2.3 |
| HARS2    | 1.3 | 7.8E-08 | 1.1 | 1.3E-06 | 1.2 | 2.3 |
| NLN      | 1.2 | 1.9E-07 | 1.1 | 1.2E-06 | 1.2 | 2.3 |
| ANKRD50  | 1.1 | 7.3E-07 | 1.2 | 1.5E-07 | 1.2 | 2.3 |
| C19orf23 | 1.2 | 1.6E-05 | 1.1 | 1.7E-05 | 1.2 | 2.3 |
| C1orf59  | 1.3 | 3.3E-08 | 1.1 | 3.2E-06 | 1.2 | 2.3 |
| ATXN1L   | 0.9 | 9.0E-05 | 1.4 | 1.2E-08 | 1.2 | 2.3 |
| VSTM2L   | 1.1 | 5.4E-06 | 1.2 | 3.0E-07 | 1.2 | 2.3 |
| PCDHB11  | 1.1 | 8.6E-07 | 1.2 | 1.4E-07 | 1.2 | 2.3 |
| INF2     | 1.1 | 1.6E-06 | 1.3 | 8.2E-08 | 1.2 | 2.3 |
| CCDC90B  | 1.1 | 1.8E-06 | 1.3 | 6.1E-08 | 1.2 | 2.3 |
| TRMT1    | 1.3 | 8.0E-08 | 1.1 | 1.4E-06 | 1.2 | 2.3 |

|           |     |         |     |         |     |     |
|-----------|-----|---------|-----|---------|-----|-----|
| SEMA3A    | 1.2 | 2.6E-07 | 1.2 | 4.9E-07 | 1.2 | 2.3 |
| KCNK7     | 1.1 | 2.9E-06 | 1.3 | 4.8E-08 | 1.2 | 2.3 |
| SLC26A6   | 1.2 | 2.5E-06 | 1.2 | 9.9E-07 | 1.2 | 2.3 |
| DMPK      | 1.1 | 2.9E-06 | 1.3 | 5.2E-08 | 1.2 | 2.3 |
| TMEM29    | 1.2 | 5.4E-07 | 1.2 | 2.5E-07 | 1.2 | 2.3 |
| C11orf63  | 1.2 | 5.6E-07 | 1.2 | 4.1E-07 | 1.2 | 2.3 |
| AGBL2     | 1.2 | 2.5E-06 | 1.2 | 1.8E-06 | 1.2 | 2.3 |
| BMS1P5    | 1.2 | 4.5E-07 | 1.2 | 3.1E-07 | 1.2 | 2.3 |
| RHBDD1    | 1.1 | 2.4E-06 | 1.3 | 1.0E-07 | 1.2 | 2.3 |
| KIAA0753  | 1.3 | 6.5E-08 | 1.1 | 2.3E-06 | 1.2 | 2.3 |
| BCAN      | 1.1 | 1.8E-04 | 1.2 | 1.5E-05 | 1.2 | 2.3 |
| TRIM47    | 0.8 | 2.1E-04 | 1.5 | 8.3E-10 | 1.2 | 2.3 |
| PHF23     | 1.1 | 2.4E-06 | 1.3 | 9.9E-08 | 1.2 | 2.2 |
| CAT       | 1.1 | 1.0E-06 | 1.2 | 1.5E-07 | 1.2 | 2.2 |
| WNT2      | 1.3 | 7.2E-07 | 1.0 | 6.5E-06 | 1.2 | 2.2 |
| MMRN2     | 1.0 | 1.1E-05 | 1.3 | 1.9E-08 | 1.2 | 2.2 |
| C1orf50   | 1.2 | 1.6E-07 | 1.1 | 9.6E-07 | 1.2 | 2.2 |
| AMIGO3    | 1.1 | 5.8E-06 | 1.2 | 2.1E-07 | 1.2 | 2.2 |
| SLC25A37  | 1.2 | 5.9E-07 | 1.1 | 3.4E-06 | 1.2 | 2.2 |
| OPRL1     | 1.0 | 2.1E-05 | 1.4 | 1.4E-08 | 1.2 | 2.2 |
| NCOA3     | 0.9 | 1.5E-04 | 1.4 | 3.2E-08 | 1.2 | 2.2 |
| OR14C36   | 1.1 | 1.5E-05 | 1.3 | 1.5E-07 | 1.2 | 2.2 |
| WDR60     | 1.1 | 1.7E-06 | 1.2 | 1.1E-07 | 1.2 | 2.2 |
| ADAM19    | 1.1 | 7.5E-07 | 1.2 | 2.9E-07 | 1.2 | 2.2 |
| C6orf27   | 1.1 | 2.4E-06 | 1.2 | 1.2E-07 | 1.2 | 2.2 |
| C1orf92   | 1.0 | 7.8E-05 | 1.3 | 4.6E-08 | 1.2 | 2.2 |
| RAD50     | 1.2 | 2.2E-07 | 1.1 | 1.0E-06 | 1.2 | 2.2 |
| CTPS      | 1.2 | 2.4E-07 | 1.1 | 8.9E-07 | 1.2 | 2.2 |
| KCNK6     | 1.2 | 1.5E-07 | 1.1 | 1.9E-06 | 1.2 | 2.2 |
| EXOC5     | 1.2 | 1.1E-06 | 1.2 | 3.3E-06 | 1.2 | 2.2 |
| SLC25A22  | 1.1 | 9.9E-07 | 1.2 | 2.9E-07 | 1.2 | 2.2 |
| POLM      | 1.0 | 4.2E-06 | 1.3 | 7.1E-08 | 1.2 | 2.2 |
| ATF7IP    | 1.3 | 5.3E-08 | 1.0 | 6.0E-06 | 1.2 | 2.2 |
| CLDN6     | 1.0 | 2.4E-04 | 1.3 | 1.6E-05 | 1.2 | 2.2 |
| COL8A2    | 1.1 | 7.1E-05 | 1.3 | 4.7E-07 | 1.2 | 2.2 |
| SFTA2     | 0.9 | 5.0E-05 | 1.4 | 5.1E-09 | 1.2 | 2.2 |
| CCDC102A  | 1.1 | 1.2E-06 | 1.2 | 2.7E-07 | 1.2 | 2.2 |
| RAB11FIP3 | 1.0 | 3.9E-06 | 1.3 | 6.8E-08 | 1.2 | 2.2 |
| MALAT1    | 1.0 | 7.6E-06 | 1.3 | 3.5E-08 | 1.2 | 2.2 |
| MGC10814  | 1.5 | 5.8E-10 | 0.8 | 3.7E-04 | 1.2 | 2.2 |
| C15orf29  | 1.2 | 1.0E-06 | 1.1 | 1.6E-06 | 1.2 | 2.2 |
| WDR54     | 1.1 | 2.7E-06 | 1.2 | 1.0E-07 | 1.2 | 2.2 |
| DYNC1H1   | 1.1 | 2.5E-06 | 1.2 | 1.1E-07 | 1.2 | 2.2 |
| ANAPC4    | 1.1 | 6.1E-07 | 1.2 | 4.6E-07 | 1.2 | 2.2 |
| VSNL1     | 1.3 | 3.8E-08 | 1.0 | 1.1E-05 | 1.2 | 2.2 |
| NUP160    | 1.1 | 1.1E-06 | 1.2 | 2.8E-07 | 1.1 | 2.2 |
| SPRY1     | 1.2 | 1.5E-07 | 1.1 | 2.9E-06 | 1.1 | 2.2 |
| ERP29     | 1.1 | 1.2E-06 | 1.2 | 2.9E-07 | 1.1 | 2.2 |
| IAH1      | 1.2 | 2.7E-07 | 1.1 | 1.3E-06 | 1.1 | 2.2 |
| EIF4E     | 1.1 | 9.9E-07 | 1.2 | 3.5E-07 | 1.1 | 2.2 |
| COMMD3    | 1.2 | 4.2E-07 | 1.1 | 8.6E-07 | 1.1 | 2.2 |
| A4GALT    | 0.9 | 7.2E-05 | 1.4 | 4.6E-09 | 1.1 | 2.2 |
| APC       | 1.0 | 7.1E-06 | 1.3 | 5.9E-08 | 1.1 | 2.2 |
| SLC30A4   | 1.0 | 5.0E-05 | 1.3 | 4.9E-07 | 1.1 | 2.2 |
| C9orf116  | 1.2 | 2.5E-07 | 1.1 | 2.0E-06 | 1.1 | 2.2 |
| GFOD1     | 1.3 | 2.4E-08 | 1.0 | 1.7E-05 | 1.1 | 2.2 |
| MTCH2     | 1.3 | 3.9E-08 | 1.0 | 9.9E-06 | 1.1 | 2.2 |
| RHPN1     | 1.2 | 4.0E-07 | 1.1 | 1.1E-06 | 1.1 | 2.2 |
| CADPS     | 1.2 | 3.8E-04 | 1.1 | 3.8E-04 | 1.1 | 2.2 |
| FAM114A1  | 1.3 | 7.4E-08 | 1.0 | 1.2E-05 | 1.1 | 2.2 |
| MYH14     | 1.0 | 1.7E-05 | 1.3 | 2.7E-08 | 1.1 | 2.2 |
| MSH5      | 1.2 | 3.1E-07 | 1.1 | 1.5E-06 | 1.1 | 2.2 |

|              |     |         |     |         |     |     |
|--------------|-----|---------|-----|---------|-----|-----|
| TMEM132A     | 1.2 | 1.9E-07 | 1.1 | 2.4E-06 | 1.1 | 2.2 |
| CAD          | 1.2 | 2.7E-07 | 1.1 | 1.7E-06 | 1.1 | 2.2 |
| TMED5        | 1.2 | 3.6E-07 | 1.1 | 2.3E-06 | 1.1 | 2.2 |
| C17orf63     | 1.2 | 3.6E-07 | 1.1 | 1.3E-06 | 1.1 | 2.2 |
| TAF9         | 1.0 | 3.5E-06 | 1.2 | 1.4E-07 | 1.1 | 2.2 |
| ZBTB40       | 1.1 | 2.4E-06 | 1.2 | 2.3E-07 | 1.1 | 2.2 |
| STRC         | 1.3 | 1.3E-07 | 1.0 | 2.2E-05 | 1.1 | 2.2 |
| ZKSCAN5      | 1.1 | 2.0E-06 | 1.2 | 4.1E-07 | 1.1 | 2.2 |
| ZNF230       | 1.3 | 8.9E-07 | 1.0 | 1.3E-05 | 1.1 | 2.2 |
| CYP2R1       | 1.3 | 7.5E-08 | 1.0 | 7.6E-06 | 1.1 | 2.2 |
| ABCA7        | 1.2 | 3.0E-06 | 1.1 | 1.8E-05 | 1.1 | 2.2 |
| DOT1L        | 1.1 | 2.9E-05 | 1.2 | 2.0E-06 | 1.1 | 2.2 |
| ZNF611       | 1.3 | 6.1E-08 | 1.0 | 1.5E-05 | 1.1 | 2.2 |
| ZNF276       | 1.2 | 7.8E-07 | 1.1 | 1.9E-06 | 1.1 | 2.2 |
| SMARCAD1     | 1.1 | 8.2E-07 | 1.1 | 9.3E-07 | 1.1 | 2.2 |
| SCAMP1       | 1.3 | 2.2E-07 | 1.0 | 2.4E-05 | 1.1 | 2.2 |
| LGI4         | 1.3 | 1.4E-07 | 1.0 | 3.4E-05 | 1.1 | 2.2 |
| TERF2IP      | 1.2 | 5.5E-07 | 1.1 | 1.2E-06 | 1.1 | 2.2 |
| MFN1         | 1.2 | 1.3E-07 | 1.0 | 6.5E-06 | 1.1 | 2.2 |
| CNTLN        | 1.2 | 4.2E-05 | 1.1 | 3.9E-05 | 1.1 | 2.2 |
| HGF          | 1.1 | 1.0E-05 | 1.2 | 1.6E-06 | 1.1 | 2.2 |
| ZNF26        | 1.1 | 4.2E-06 | 1.2 | 2.4E-07 | 1.1 | 2.2 |
| CAPZA1       | 1.2 | 5.3E-07 | 1.1 | 1.3E-06 | 1.1 | 2.2 |
| KLK14        | 1.1 | 1.3E-05 | 1.2 | 1.0E-06 | 1.1 | 2.2 |
| KDM1B        | 1.0 | 2.4E-04 | 1.2 | 1.4E-05 | 1.1 | 2.2 |
| LOC100129726 | 0.8 | 5.0E-04 | 1.4 | 1.3E-08 | 1.1 | 2.2 |
| ZNF600       | 1.3 | 6.1E-08 | 1.0 | 1.9E-05 | 1.1 | 2.2 |
| ZNF433       | 1.4 | 2.0E-08 | 0.9 | 7.1E-05 | 1.1 | 2.2 |
| FOXC2        | 0.9 | 2.5E-05 | 1.3 | 3.1E-08 | 1.1 | 2.2 |
| PROCA1       | 1.1 | 2.1E-06 | 1.2 | 6.6E-07 | 1.1 | 2.2 |
| KCNB2        | 1.2 | 5.4E-05 | 1.1 | 1.2E-05 | 1.1 | 2.2 |
| CGREF1       | 1.1 | 3.4E-06 | 1.2 | 2.8E-07 | 1.1 | 2.2 |
| GSPT1        | 1.3 | 2.9E-08 | 0.9 | 4.4E-05 | 1.1 | 2.2 |
| FAP          | 1.2 | 2.5E-07 | 1.0 | 4.1E-06 | 1.1 | 2.2 |
| MKMK2        | 1.0 | 6.5E-06 | 1.2 | 2.3E-07 | 1.1 | 2.2 |
| MAGED4       | 1.1 | 6.7E-07 | 1.1 | 1.4E-06 | 1.1 | 2.2 |
| MAGOH        | 1.2 | 4.0E-07 | 1.0 | 1.1E-05 | 1.1 | 2.2 |
| BBS10        | 1.1 | 1.4E-06 | 1.1 | 1.4E-06 | 1.1 | 2.2 |
| SLC35E4      | 1.1 | 8.5E-07 | 1.1 | 1.1E-06 | 1.1 | 2.2 |
| KCNB1        | 0.9 | 4.0E-04 | 1.3 | 3.5E-07 | 1.1 | 2.2 |
| ZNF226       | 0.9 | 2.9E-05 | 1.3 | 3.9E-08 | 1.1 | 2.2 |
| CBX8         | 1.0 | 1.5E-05 | 1.2 | 5.9E-07 | 1.1 | 2.2 |
| ZNF550       | 1.0 | 6.0E-06 | 1.2 | 1.8E-07 | 1.1 | 2.2 |
| ISYNA1       | 1.0 | 6.6E-06 | 1.2 | 1.6E-07 | 1.1 | 2.2 |
| ADA          | 1.1 | 8.7E-07 | 1.1 | 1.2E-06 | 1.1 | 2.2 |
| PIP4K2B      | 0.9 | 4.9E-04 | 1.3 | 5.0E-07 | 1.1 | 2.2 |
| ZNF821       | 1.1 | 5.9E-07 | 1.1 | 1.9E-06 | 1.1 | 2.2 |
| SPDEF        | 1.1 | 4.4E-04 | 1.2 | 5.9E-05 | 1.1 | 2.2 |
| TWSG1        | 1.2 | 5.1E-07 | 1.0 | 5.7E-06 | 1.1 | 2.2 |
| TUBA3D       | 0.9 | 2.2E-04 | 1.4 | 2.4E-08 | 1.1 | 2.2 |
| NCAN         | 1.3 | 3.3E-05 | 0.9 | 9.5E-04 | 1.1 | 2.2 |
| TAS1R1       | 1.0 | 3.9E-05 | 1.2 | 3.0E-07 | 1.1 | 2.2 |
| PUS7L        | 1.2 | 2.8E-07 | 1.0 | 7.1E-06 | 1.1 | 2.2 |
| PLA2G4D      | 1.0 | 1.4E-05 | 1.2 | 1.0E-07 | 1.1 | 2.2 |
| PPP2R2B      | 1.0 | 3.9E-05 | 1.3 | 2.4E-07 | 1.1 | 2.2 |
| SFMBT1       | 1.2 | 3.3E-07 | 1.0 | 4.4E-06 | 1.1 | 2.2 |
| CYFIP2       | 1.1 | 2.8E-05 | 1.2 | 2.2E-06 | 1.1 | 2.2 |
| FECH         | 1.0 | 1.5E-05 | 1.3 | 8.0E-08 | 1.1 | 2.2 |
| SH3GL3       | 1.0 | 3.3E-05 | 1.2 | 1.1E-06 | 1.1 | 2.2 |
| RBM25        | 1.1 | 1.9E-06 | 1.1 | 7.0E-07 | 1.1 | 2.2 |
| TOX4         | 1.1 | 1.4E-06 | 1.1 | 1.4E-06 | 1.1 | 2.2 |
| C11orf74     | 1.0 | 6.7E-06 | 1.2 | 1.9E-07 | 1.1 | 2.2 |

|           |     |         |     |         |     |     |
|-----------|-----|---------|-----|---------|-----|-----|
| ZNF283    | 1.3 | 8.9E-07 | 0.9 | 1.0E-04 | 1.1 | 2.2 |
| FXR1      | 1.3 | 8.1E-08 | 1.0 | 1.7E-05 | 1.1 | 2.2 |
| FAHD1     | 1.1 | 5.9E-07 | 1.1 | 2.7E-06 | 1.1 | 2.2 |
| HIST1H2AG | 1.3 | 8.2E-08 | 0.9 | 4.1E-05 | 1.1 | 2.1 |
| C9orf40   | 1.2 | 5.6E-07 | 1.0 | 4.4E-06 | 1.1 | 2.1 |
| STX16     | 1.1 | 2.0E-05 | 1.2 | 2.8E-06 | 1.1 | 2.1 |
| ZNF385A   | 1.0 | 5.9E-06 | 1.2 | 3.2E-07 | 1.1 | 2.1 |
| DENND1C   | 1.0 | 5.8E-05 | 1.2 | 1.5E-06 | 1.1 | 2.1 |
| MASP1     | 1.0 | 6.4E-06 | 1.2 | 3.7E-07 | 1.1 | 2.1 |
| RBPMS2    | 1.1 | 7.2E-05 | 1.1 | 3.5E-05 | 1.1 | 2.1 |
| OR7E19P   | 1.1 | 2.8E-05 | 1.1 | 1.2E-05 | 1.1 | 2.1 |
| RFX3      | 1.2 | 1.5E-05 | 1.0 | 1.5E-05 | 1.1 | 2.1 |
| KLK9      | 0.9 | 1.6E-04 | 1.3 | 1.4E-07 | 1.1 | 2.1 |
| CBLN3     | 0.9 | 4.2E-04 | 1.3 | 8.1E-08 | 1.1 | 2.1 |
| DEGS2     | 0.9 | 3.7E-05 | 1.3 | 1.4E-07 | 1.1 | 2.1 |
| RNASE6    | 1.0 | 1.0E-05 | 1.2 | 1.2E-06 | 1.1 | 2.1 |
| ARID4B    | 1.3 | 6.0E-08 | 0.9 | 3.5E-05 | 1.1 | 2.1 |
| BIRC2     | 1.2 | 2.0E-07 | 1.0 | 9.1E-06 | 1.1 | 2.1 |
| ZZEF1     | 1.0 | 6.1E-06 | 1.1 | 9.2E-07 | 1.1 | 2.1 |
| TDP1      | 1.1 | 7.4E-07 | 1.1 | 2.8E-06 | 1.1 | 2.1 |
| ZNF84     | 1.3 | 5.4E-08 | 0.9 | 4.9E-05 | 1.1 | 2.1 |
| KDM2B     | 1.3 | 7.5E-08 | 0.9 | 3.3E-05 | 1.1 | 2.1 |
| CTGLF1    | 1.1 | 8.8E-07 | 1.1 | 2.4E-06 | 1.1 | 2.1 |
| RFX5      | 1.0 | 2.0E-05 | 1.1 | 2.4E-06 | 1.1 | 2.1 |
| ALDH4A1   | 1.0 | 4.0E-06 | 1.1 | 5.9E-07 | 1.1 | 2.1 |
| LARP1     | 1.0 | 6.2E-06 | 1.2 | 3.5E-07 | 1.1 | 2.1 |
| CDC7      | 1.1 | 1.9E-06 | 1.1 | 1.9E-06 | 1.1 | 2.1 |
| CGB8      | 1.0 | 2.3E-04 | 1.2 | 3.9E-06 | 1.1 | 2.1 |
| ELL3      | 1.2 | 4.9E-07 | 1.0 | 5.3E-06 | 1.1 | 2.1 |
| KLC2      | 1.0 | 6.6E-06 | 1.2 | 3.8E-07 | 1.1 | 2.1 |
| PGBD1     | 1.0 | 1.2E-04 | 1.2 | 1.2E-06 | 1.1 | 2.1 |
| PCDHB15   | 1.2 | 9.3E-07 | 1.0 | 1.5E-05 | 1.1 | 2.1 |
| KLHL8     | 1.0 | 5.2E-05 | 1.1 | 7.4E-06 | 1.1 | 2.1 |
| CDC14B    | 1.2 | 5.0E-07 | 1.0 | 9.9E-06 | 1.1 | 2.1 |
| C14orf37  | 1.2 | 2.1E-07 | 0.9 | 3.5E-05 | 1.1 | 2.1 |
| RSRC2     | 1.1 | 2.3E-06 | 1.1 | 1.2E-06 | 1.1 | 2.1 |
| PRPH      | 1.1 | 6.0E-06 | 1.1 | 5.7E-06 | 1.1 | 2.1 |
| PLCE1     | 1.2 | 2.4E-07 | 1.0 | 1.3E-05 | 1.1 | 2.1 |
| C15orf5   | 1.2 | 1.7E-07 | 0.9 | 2.6E-05 | 1.1 | 2.1 |
| PHIP      | 1.1 | 1.3E-06 | 1.1 | 2.2E-06 | 1.1 | 2.1 |
| BBS12     | 1.2 | 9.7E-07 | 1.0 | 1.3E-05 | 1.1 | 2.1 |
| STX8      | 1.2 | 1.5E-07 | 0.9 | 2.2E-05 | 1.1 | 2.1 |
| AKT3      | 1.1 | 8.3E-06 | 1.0 | 1.7E-05 | 1.1 | 2.1 |
| ZNF83     | 1.1 | 1.9E-06 | 1.1 | 1.9E-06 | 1.1 | 2.1 |
| ZFP112    | 1.1 | 1.8E-06 | 1.1 | 3.4E-06 | 1.1 | 2.1 |
| NPBWR2    | 1.1 | 3.5E-04 | 1.1 | 1.3E-04 | 1.1 | 2.1 |
| HSF4      | 1.0 | 1.2E-05 | 1.1 | 2.1E-06 | 1.1 | 2.1 |
| EID3      | 1.2 | 4.9E-07 | 1.0 | 1.8E-05 | 1.1 | 2.1 |
| CXCR4     | 1.0 | 5.6E-06 | 1.1 | 6.6E-07 | 1.1 | 2.1 |
| FLJ25694  | 1.1 | 2.1E-05 | 1.1 | 2.7E-06 | 1.1 | 2.1 |
| IPO5      | 1.2 | 2.0E-07 | 0.9 | 1.9E-05 | 1.1 | 2.1 |
| PSMD12    | 1.1 | 2.4E-06 | 1.1 | 1.8E-06 | 1.1 | 2.1 |
| MPDU1     | 1.0 | 1.0E-05 | 1.2 | 5.0E-07 | 1.1 | 2.1 |
| EMP3      | 1.0 | 5.6E-06 | 1.1 | 7.4E-07 | 1.1 | 2.1 |
| SMARCC1   | 1.1 | 3.9E-06 | 1.1 | 4.3E-06 | 1.1 | 2.1 |
| LYRM2     | 1.0 | 7.5E-06 | 1.1 | 6.5E-07 | 1.1 | 2.1 |
| LCE2D     | 1.0 | 6.9E-06 | 1.1 | 9.6E-07 | 1.1 | 2.1 |
| MS4A7     | 1.2 | 4.6E-07 | 1.0 | 1.3E-05 | 1.1 | 2.1 |
| ABHD5     | 1.0 | 4.9E-06 | 1.1 | 1.2E-06 | 1.1 | 2.1 |
| INPPL1    | 1.3 | 5.8E-08 | 0.9 | 6.9E-05 | 1.1 | 2.1 |
| MAPK8IP2  | 1.0 | 4.0E-05 | 1.2 | 1.0E-06 | 1.1 | 2.1 |
| CDH15     | 1.0 | 3.0E-05 | 1.1 | 1.4E-06 | 1.1 | 2.1 |

|           |     |         |     |         |     |     |
|-----------|-----|---------|-----|---------|-----|-----|
| C17orf85  | 1.1 | 8.2E-07 | 1.0 | 6.0E-06 | 1.1 | 2.1 |
| ZFC3H1    | 1.1 | 7.9E-07 | 1.0 | 6.5E-06 | 1.1 | 2.1 |
| HIST1H4H  | 1.2 | 8.4E-07 | 1.0 | 1.8E-05 | 1.1 | 2.1 |
| RBM14     | 1.0 | 8.3E-06 | 1.1 | 6.1E-07 | 1.1 | 2.1 |
| CD1D      | 1.1 | 1.1E-04 | 1.1 | 1.2E-04 | 1.1 | 2.1 |
| NOVA1     | 1.1 | 4.5E-06 | 1.0 | 2.6E-05 | 1.1 | 2.1 |
| SAMD10    | 0.9 | 1.5E-04 | 1.2 | 4.9E-07 | 1.1 | 2.1 |
| ZRANB1    | 1.1 | 1.0E-06 | 1.0 | 5.4E-06 | 1.1 | 2.1 |
| MADCAM1   | 1.0 | 9.4E-05 | 1.1 | 2.0E-06 | 1.1 | 2.1 |
| PPP3CC    | 1.2 | 1.7E-07 | 0.9 | 3.1E-05 | 1.1 | 2.1 |
| CYTH1     | 1.2 | 1.5E-07 | 0.9 | 3.4E-05 | 1.1 | 2.1 |
| ZNF354A   | 1.2 | 4.2E-07 | 0.9 | 2.8E-05 | 1.1 | 2.1 |
| KLHL35    | 1.0 | 7.9E-06 | 1.1 | 1.5E-06 | 1.1 | 2.1 |
| CTBP2     | 0.8 | 2.4E-04 | 1.3 | 1.9E-08 | 1.1 | 2.1 |
| EBLN2     | 1.1 | 1.8E-06 | 1.0 | 3.4E-06 | 1.1 | 2.1 |
| ZNF565    | 1.1 | 8.8E-07 | 1.0 | 1.2E-05 | 1.1 | 2.1 |
| RAP1GDS1  | 1.2 | 7.4E-07 | 1.0 | 1.4E-05 | 1.1 | 2.1 |
| DOCK11    | 1.0 | 5.0E-06 | 1.1 | 1.9E-06 | 1.1 | 2.1 |
| NAV2      | 1.0 | 1.8E-04 | 1.2 | 1.3E-06 | 1.1 | 2.1 |
| HSPB3     | 1.1 | 1.4E-05 | 1.1 | 6.9E-06 | 1.1 | 2.1 |
| ZNF93     | 1.0 | 4.9E-06 | 1.1 | 1.9E-06 | 1.1 | 2.1 |
| RPL26L1   | 1.1 | 2.5E-06 | 1.1 | 2.8E-06 | 1.1 | 2.1 |
| ZNF444    | 1.1 | 1.3E-06 | 1.0 | 5.2E-06 | 1.1 | 2.1 |
| FBXO17    | 1.1 | 1.5E-06 | 1.0 | 4.7E-06 | 1.1 | 2.1 |
| TLE1      | 1.0 | 3.9E-06 | 1.1 | 1.9E-06 | 1.1 | 2.1 |
| CRK       | 0.9 | 2.7E-05 | 1.2 | 3.3E-07 | 1.1 | 2.1 |
| DNAJC9    | 1.2 | 4.2E-07 | 1.0 | 1.6E-05 | 1.1 | 2.1 |
| FLJ39653  | 1.2 | 1.7E-07 | 0.9 | 6.8E-05 | 1.1 | 2.1 |
| SYNRG     | 1.3 | 8.9E-08 | 0.9 | 1.0E-04 | 1.1 | 2.1 |
| BNIP3     | 0.9 | 2.9E-05 | 1.2 | 2.4E-07 | 1.1 | 2.1 |
| SLC35A1   | 1.1 | 2.5E-06 | 1.0 | 3.7E-06 | 1.1 | 2.1 |
| ATP2C1    | 1.0 | 1.6E-05 | 1.2 | 4.9E-07 | 1.1 | 2.1 |
| LCAT      | 1.1 | 1.7E-06 | 1.0 | 6.7E-06 | 1.1 | 2.1 |
| ZNF280C   | 1.3 | 4.9E-07 | 0.8 | 2.1E-04 | 1.1 | 2.1 |
| PSIP1     | 1.3 | 1.3E-07 | 0.8 | 2.5E-04 | 1.1 | 2.1 |
| TBC1D16   | 1.1 | 3.0E-06 | 1.0 | 3.8E-06 | 1.1 | 2.1 |
| ALOX5     | 1.1 | 1.2E-06 | 1.0 | 7.6E-06 | 1.1 | 2.1 |
| SRSF6     | 1.2 | 2.5E-07 | 0.9 | 4.0E-05 | 1.1 | 2.1 |
| RBM18     | 0.9 | 2.1E-05 | 1.2 | 4.8E-07 | 1.1 | 2.1 |
| ZNF561    | 1.3 | 8.4E-08 | 0.8 | 8.8E-04 | 1.1 | 2.1 |
| SPRY2     | 1.1 | 2.4E-06 | 1.0 | 3.9E-06 | 1.1 | 2.1 |
| RHBDF2    | 1.1 | 2.6E-06 | 1.0 | 4.6E-06 | 1.1 | 2.1 |
| CHST8     | 0.9 | 4.6E-05 | 1.2 | 4.4E-07 | 1.1 | 2.1 |
| RANBP6    | 0.9 | 3.2E-04 | 1.2 | 1.3E-05 | 1.1 | 2.1 |
| UBE2A     | 1.1 | 2.3E-06 | 1.0 | 4.3E-06 | 1.1 | 2.1 |
| SLC17A9   | 0.9 | 2.6E-05 | 1.2 | 5.4E-07 | 1.1 | 2.1 |
| TRPM4     | 1.2 | 2.2E-07 | 0.9 | 4.8E-05 | 1.1 | 2.1 |
| RUSC1     | 1.1 | 2.7E-06 | 1.0 | 4.1E-06 | 1.1 | 2.1 |
| P4HA2     | 1.2 | 4.6E-07 | 0.9 | 2.2E-05 | 1.1 | 2.1 |
| ASB3      | 1.1 | 2.8E-06 | 1.0 | 4.2E-06 | 1.1 | 2.1 |
| PPP2CA    | 1.0 | 1.1E-05 | 1.1 | 9.2E-07 | 1.1 | 2.1 |
| KRTAP4-14 | 0.9 | 2.7E-04 | 1.2 | 2.2E-07 | 1.0 | 2.1 |
| EIF2S1    | 1.2 | 4.7E-07 | 0.9 | 2.2E-05 | 1.0 | 2.1 |
| C2orf39   | 1.1 | 1.8E-06 | 1.0 | 2.3E-05 | 1.0 | 2.1 |
| C3orf23   | 0.9 | 6.0E-05 | 1.2 | 2.0E-07 | 1.0 | 2.1 |
| UBA3      | 1.2 | 2.5E-07 | 0.9 | 4.3E-05 | 1.0 | 2.1 |
| EHMT1     | 0.9 | 5.0E-05 | 1.2 | 2.1E-07 | 1.0 | 2.1 |
| NQO1      | 1.2 | 1.1E-07 | 0.9 | 8.9E-05 | 1.0 | 2.1 |
| LAMB2     | 1.0 | 8.8E-06 | 1.1 | 1.2E-06 | 1.0 | 2.1 |
| ZDHHC17   | 1.2 | 2.5E-07 | 0.9 | 4.3E-05 | 1.0 | 2.1 |
| TMEM8B    | 1.1 | 1.7E-06 | 1.0 | 7.5E-06 | 1.0 | 2.1 |
| IP6K2     | 1.0 | 5.7E-06 | 1.1 | 2.0E-06 | 1.0 | 2.1 |

|           |     |         |     |         |     |     |
|-----------|-----|---------|-----|---------|-----|-----|
| EGLN1     | 1.0 | 4.0E-06 | 1.1 | 3.3E-06 | 1.0 | 2.1 |
| TCF15     | 0.7 | 6.2E-04 | 1.4 | 1.5E-08 | 1.0 | 2.1 |
| ABCB6     | 1.1 | 1.0E-06 | 1.0 | 1.1E-05 | 1.0 | 2.1 |
| MXD3      | 1.1 | 8.1E-07 | 1.0 | 1.4E-05 | 1.0 | 2.1 |
| FAM122B   | 1.2 | 2.3E-07 | 0.9 | 9.1E-05 | 1.0 | 2.1 |
| KRT85     | 0.9 | 1.9E-04 | 1.2 | 2.7E-07 | 1.0 | 2.1 |
| PCBD2     | 1.0 | 4.3E-06 | 1.0 | 4.1E-06 | 1.0 | 2.1 |
| TARSL2    | 1.2 | 3.0E-07 | 0.9 | 7.5E-05 | 1.0 | 2.1 |
| FOXK2     | 1.2 | 3.8E-07 | 0.9 | 3.6E-05 | 1.0 | 2.1 |
| UBE2V2    | 1.1 | 2.5E-06 | 1.0 | 5.2E-06 | 1.0 | 2.1 |
| C15orf41  | 1.0 | 1.0E-05 | 1.0 | 6.5E-06 | 1.0 | 2.1 |
| LOC338799 | 1.1 | 3.0E-06 | 1.0 | 4.6E-06 | 1.0 | 2.1 |
| C12orf11  | 1.0 | 3.4E-06 | 1.0 | 4.2E-06 | 1.0 | 2.1 |
| PFDN1     | 1.0 | 3.6E-06 | 1.0 | 3.9E-06 | 1.0 | 2.1 |
| CTBP1     | 1.1 | 2.2E-06 | 1.0 | 6.5E-06 | 1.0 | 2.1 |
| GJD3      | 0.8 | 8.0E-04 | 1.3 | 1.0E-07 | 1.0 | 2.1 |
| SPERT     | 0.8 | 3.1E-04 | 1.3 | 4.4E-08 | 1.0 | 2.1 |
| ID1       | 1.1 | 1.4E-06 | 1.0 | 1.1E-05 | 1.0 | 2.1 |
| PPP1R16B  | 1.2 | 1.0E-06 | 0.9 | 3.4E-05 | 1.0 | 2.1 |
| SYMPK     | 1.3 | 6.3E-08 | 0.8 | 2.0E-04 | 1.0 | 2.1 |
| ADAMTSL2  | 0.8 | 1.5E-04 | 1.2 | 1.2E-07 | 1.0 | 2.1 |
| LRMP      | 1.2 | 6.6E-07 | 0.9 | 4.1E-05 | 1.0 | 2.1 |
| RLF       | 1.1 | 2.9E-06 | 1.0 | 5.6E-06 | 1.0 | 2.1 |
| ZNF134    | 0.9 | 7.9E-05 | 1.2 | 2.5E-06 | 1.0 | 2.1 |
| PPYR1     | 1.0 | 1.4E-05 | 1.1 | 1.8E-06 | 1.0 | 2.1 |
| CHST2     | 0.9 | 4.5E-05 | 1.2 | 4.1E-07 | 1.0 | 2.1 |
| DEM1      | 1.3 | 1.1E-07 | 0.8 | 1.9E-04 | 1.0 | 2.1 |
| CHORDC1   | 1.0 | 6.4E-06 | 1.1 | 2.9E-06 | 1.0 | 2.0 |
| ZSCAN2    | 1.2 | 4.6E-07 | 0.9 | 1.1E-04 | 1.0 | 2.0 |
| CTRL      | 0.9 | 1.8E-04 | 1.2 | 9.0E-07 | 1.0 | 2.0 |
| HR        | 0.8 | 8.6E-04 | 1.2 | 5.2E-07 | 1.0 | 2.0 |
| FAM120C   | 1.2 | 5.3E-07 | 0.9 | 4.4E-05 | 1.0 | 2.0 |
| FADS1     | 0.9 | 7.0E-05 | 1.2 | 2.6E-07 | 1.0 | 2.0 |
| PIK3C3    | 1.1 | 1.1E-06 | 0.9 | 1.9E-05 | 1.0 | 2.0 |
| ARL4A     | 1.1 | 1.4E-06 | 1.0 | 1.4E-05 | 1.0 | 2.0 |
| DYX1C1    | 1.0 | 4.5E-05 | 1.1 | 3.3E-06 | 1.0 | 2.0 |
| ND5       | 1.0 | 4.9E-06 | 1.0 | 4.4E-06 | 1.0 | 2.0 |
| MBOAT2    | 0.8 | 1.3E-04 | 1.2 | 1.7E-07 | 1.0 | 2.0 |
| ZNF296    | 1.1 | 2.2E-04 | 1.0 | 2.0E-04 | 1.0 | 2.0 |
| USHBP1    | 1.0 | 3.4E-05 | 1.1 | 3.4E-06 | 1.0 | 2.0 |
| AOAH      | 1.1 | 1.6E-06 | 0.9 | 2.4E-05 | 1.0 | 2.0 |
| GPD1      | 0.8 | 2.7E-04 | 1.2 | 3.2E-07 | 1.0 | 2.0 |
| SUSD2     | 0.9 | 2.1E-05 | 1.1 | 1.2E-06 | 1.0 | 2.0 |
| HDLBP     | 0.9 | 3.3E-05 | 1.1 | 1.5E-06 | 1.0 | 2.0 |
| SNRNP27   | 0.9 | 8.0E-05 | 1.2 | 2.7E-07 | 1.0 | 2.0 |
| VEGFC     | 1.3 | 8.1E-08 | 0.8 | 2.5E-04 | 1.0 | 2.0 |
| FLJ13197  | 1.0 | 4.3E-06 | 1.0 | 6.1E-06 | 1.0 | 2.0 |
| INTS6     | 1.0 | 8.9E-06 | 1.1 | 2.9E-06 | 1.0 | 2.0 |
| GREM2     | 1.0 | 3.7E-04 | 1.1 | 4.9E-05 | 1.0 | 2.0 |
| KRTAP5-9  | 0.9 | 3.2E-05 | 1.1 | 1.4E-06 | 1.0 | 2.0 |
| FAM135B   | 0.9 | 1.6E-04 | 1.2 | 6.1E-07 | 1.0 | 2.0 |
| CARS2     | 1.1 | 2.6E-06 | 1.0 | 1.0E-05 | 1.0 | 2.0 |
| C1QB      | 1.0 | 9.0E-06 | 1.1 | 3.0E-06 | 1.0 | 2.0 |
| SPINT2    | 0.9 | 2.5E-05 | 1.1 | 1.1E-06 | 1.0 | 2.0 |
| COL9A2    | 1.0 | 1.6E-05 | 1.0 | 9.3E-06 | 1.0 | 2.0 |
| PCP4      | 1.1 | 5.0E-05 | 1.0 | 4.8E-05 | 1.0 | 2.0 |
| SPATA2L   | 0.9 | 3.8E-05 | 1.1 | 8.3E-07 | 1.0 | 2.0 |
| ZNF434    | 1.0 | 1.9E-05 | 1.0 | 5.5E-06 | 1.0 | 2.0 |
| CACNB1    | 0.9 | 4.8E-05 | 1.1 | 8.1E-07 | 1.0 | 2.0 |
| SCN4B     | 1.1 | 1.8E-06 | 0.9 | 2.6E-05 | 1.0 | 2.0 |
| HN1L      | 1.0 | 1.5E-05 | 1.1 | 2.1E-06 | 1.0 | 2.0 |
| DMXL2     | 1.0 | 1.7E-05 | 1.1 | 2.2E-06 | 1.0 | 2.0 |

|          |     |         |     |         |     |     |
|----------|-----|---------|-----|---------|-----|-----|
| MPP5     | 1.1 | 5.7E-06 | 0.9 | 1.3E-04 | 1.0 | 2.0 |
| LTB4R2   | 1.0 | 6.6E-04 | 1.0 | 8.3E-06 | 1.0 | 2.0 |
| FAM20C   | 1.1 | 2.6E-06 | 1.0 | 1.5E-05 | 1.0 | 2.0 |
| HERC4    | 1.2 | 1.2E-06 | 0.9 | 1.1E-04 | 1.0 | 2.0 |
| FCER1G   | 1.0 | 1.0E-05 | 1.0 | 4.4E-06 | 1.0 | 2.0 |
| CYP11B1  | 0.9 | 2.8E-04 | 1.1 | 3.3E-06 | 1.0 | 2.0 |
| SLAMF9   | 1.0 | 2.8E-04 | 1.0 | 2.9E-05 | 1.0 | 2.0 |
| PSORS1C2 | 0.9 | 1.3E-04 | 1.2 | 6.8E-07 | 1.0 | 2.0 |
| C19orf40 | 1.0 | 2.5E-05 | 1.0 | 2.0E-05 | 1.0 | 2.0 |
| KDM3A    | 1.0 | 5.3E-06 | 1.0 | 8.2E-06 | 1.0 | 2.0 |
| RB1CC1   | 1.1 | 2.1E-06 | 0.9 | 2.2E-05 | 1.0 | 2.0 |
| FBN2     | 0.9 | 8.0E-05 | 1.1 | 4.1E-06 | 1.0 | 2.0 |
| CPSF2    | 1.0 | 5.6E-06 | 1.0 | 1.2E-05 | 1.0 | 2.0 |
| SCD5     | 1.2 | 4.1E-07 | 0.8 | 2.2E-04 | 1.0 | 2.0 |
| RRAS2    | 1.1 | 1.4E-06 | 0.9 | 7.2E-05 | 1.0 | 2.0 |
| LRRC42   | 1.1 | 2.0E-06 | 0.9 | 2.3E-05 | 1.0 | 2.0 |
| PTPN5    | 1.0 | 8.5E-06 | 1.0 | 7.8E-06 | 1.0 | 2.0 |
| SLC36A4  | 1.2 | 5.4E-07 | 0.8 | 2.8E-04 | 1.0 | 2.0 |
| CCDC92   | 0.9 | 2.4E-05 | 1.1 | 2.3E-06 | 1.0 | 2.0 |
| PLEKHJ1  | 1.1 | 2.5E-06 | 0.9 | 1.9E-05 | 1.0 | 2.0 |
| LETM1    | 1.2 | 3.8E-07 | 0.8 | 1.7E-04 | 1.0 | 2.0 |
| SSTR3    | 0.8 | 6.2E-04 | 1.2 | 2.8E-07 | 1.0 | 2.0 |
| ASCC3    | 0.9 | 7.8E-05 | 1.1 | 8.5E-07 | 1.0 | 2.0 |
| PORCN    | 1.1 | 1.8E-06 | 0.9 | 2.8E-05 | 1.0 | 2.0 |
| OSCAR    | 1.0 | 1.6E-05 | 1.1 | 3.2E-06 | 1.0 | 2.0 |
| RBM4     | 1.0 | 1.8E-05 | 1.1 | 3.0E-06 | 1.0 | 2.0 |
| POSTN    | 1.1 | 1.5E-06 | 0.9 | 3.4E-05 | 1.0 | 2.0 |
| NLRP1    | 0.8 | 3.8E-04 | 1.2 | 7.6E-07 | 1.0 | 2.0 |
| FAM199X  | 1.1 | 2.9E-06 | 0.9 | 1.9E-05 | 1.0 | 2.0 |
| TMEM188  | 0.9 | 2.6E-05 | 1.1 | 2.3E-06 | 1.0 | 2.0 |
| CAPN7    | 1.0 | 4.7E-06 | 1.0 | 1.4E-05 | 1.0 | 2.0 |
| EZH2     | 1.0 | 8.0E-06 | 1.0 | 7.6E-06 | 1.0 | 2.0 |
| PPIC     | 1.0 | 1.1E-05 | 1.0 | 5.9E-06 | 1.0 | 2.0 |
| PDE8A    | 1.2 | 5.7E-07 | 0.8 | 1.3E-04 | 1.0 | 2.0 |
| CHCHD8   | 0.9 | 3.0E-05 | 1.1 | 2.0E-06 | 1.0 | 2.0 |
| C19orf38 | 0.8 | 8.2E-04 | 1.2 | 2.0E-06 | 1.0 | 2.0 |
| ANKRD13D | 1.1 | 2.8E-06 | 0.9 | 2.4E-05 | 1.0 | 2.0 |
| C11orf71 | 1.2 | 7.1E-06 | 0.8 | 7.7E-04 | 1.0 | 2.0 |
| SMC6     | 1.1 | 1.5E-06 | 0.9 | 5.2E-05 | 1.0 | 2.0 |
| HYAL2    | 1.0 | 5.6E-06 | 1.0 | 1.3E-05 | 1.0 | 2.0 |
| ALG6     | 1.0 | 6.7E-06 | 1.0 | 1.7E-05 | 1.0 | 2.0 |
| ARHGAP26 | 0.9 | 4.1E-04 | 1.1 | 4.5E-05 | 1.0 | 2.0 |
| SIGLEC10 | 1.0 | 1.1E-05 | 1.0 | 1.9E-05 | 1.0 | 2.0 |
| SIGLEC12 | 1.0 | 1.1E-05 | 1.0 | 1.9E-05 | 1.0 | 2.0 |
| TRIAP1   | 1.0 | 9.5E-06 | 1.0 | 7.7E-06 | 1.0 | 2.0 |
| WNT3A    | 0.9 | 6.3E-05 | 1.1 | 1.6E-06 | 1.0 | 2.0 |
| MMRN1    | 1.1 | 2.2E-05 | 0.9 | 2.2E-04 | 1.0 | 2.0 |
| MFSD10   | 0.9 | 5.6E-05 | 1.1 | 2.8E-06 | 1.0 | 2.0 |
| EBNA1BP2 | 0.9 | 4.0E-05 | 1.1 | 1.9E-06 | 1.0 | 2.0 |
| MS4A6A   | 1.1 | 2.1E-06 | 0.8 | 2.0E-04 | 1.0 | 2.0 |
| PARVG    | 1.1 | 3.3E-06 | 0.9 | 3.9E-05 | 1.0 | 2.0 |
| C5orf15  | 1.1 | 1.6E-06 | 0.9 | 4.9E-05 | 1.0 | 2.0 |
| UBR2     | 1.1 | 6.1E-07 | 0.8 | 1.3E-04 | 1.0 | 2.0 |
| TXNL4A   | 1.2 | 3.6E-07 | 0.8 | 2.0E-04 | 1.0 | 2.0 |
| HMGA2    | 1.0 | 1.5E-05 | 1.0 | 6.0E-06 | 1.0 | 2.0 |
| C6orf125 | 1.0 | 3.6E-06 | 0.9 | 2.4E-05 | 1.0 | 2.0 |
| OR6T1    | 1.0 | 1.1E-04 | 1.0 | 9.1E-06 | 1.0 | 2.0 |
| PAPOLA   | 1.2 | 9.5E-07 | 0.8 | 5.4E-04 | 1.0 | 2.0 |
| NASP     | 1.0 | 1.1E-05 | 1.0 | 9.0E-06 | 1.0 | 2.0 |
| C16orf59 | 1.2 | 2.2E-07 | 0.8 | 4.2E-04 | 1.0 | 2.0 |
| ZNF673   | 0.9 | 6.9E-05 | 1.1 | 1.4E-06 | 1.0 | 2.0 |
| CEACAM7  | 0.9 | 1.0E-04 | 1.1 | 1.4E-06 | 1.0 | 2.0 |

|           |     |         |     |         |     |     |
|-----------|-----|---------|-----|---------|-----|-----|
| WFDC3     | 0.8 | 4.6E-04 | 1.2 | 3.1E-07 | 1.0 | 2.0 |
| FGFBP3    | 1.1 | 2.0E-06 | 0.9 | 5.8E-05 | 1.0 | 2.0 |
| RB1       | 1.2 | 4.5E-07 | 0.8 | 2.0E-04 | 1.0 | 2.0 |
| KCNG1     | 1.0 | 1.4E-05 | 1.0 | 2.6E-05 | 1.0 | 2.0 |
| SIRPB1    | 0.9 | 1.9E-04 | 1.1 | 2.0E-06 | 1.0 | 2.0 |
| PRAF2     | 0.9 | 2.5E-05 | 1.0 | 5.4E-06 | 1.0 | 2.0 |
| FBXO22    | 0.9 | 3.9E-05 | 1.1 | 3.1E-06 | 1.0 | 2.0 |
| METTL9    | 0.9 | 2.7E-05 | 1.0 | 5.7E-06 | 1.0 | 2.0 |
| PAGE4     | 1.0 | 2.7E-04 | 1.0 | 3.5E-04 | 1.0 | 2.0 |
| HSD17B4   | 1.0 | 3.8E-06 | 0.9 | 3.3E-05 | 1.0 | 2.0 |
| SLAMF8    | 1.2 | 6.3E-07 | 0.8 | 4.0E-04 | 1.0 | 2.0 |
| CGGBP1    | 1.0 | 1.6E-05 | 1.0 | 7.7E-06 | 1.0 | 2.0 |
| ACBD3     | 1.0 | 5.6E-06 | 0.9 | 2.3E-05 | 1.0 | 2.0 |
| DMTF1     | 0.9 | 5.4E-05 | 1.1 | 2.2E-06 | 1.0 | 2.0 |
| CDC42SE1  | 0.9 | 2.4E-05 | 1.0 | 5.0E-06 | 1.0 | 2.0 |
| OTOP2     | 0.9 | 9.6E-05 | 1.0 | 1.3E-05 | 1.0 | 2.0 |
| APOC2     | 0.9 | 4.8E-05 | 1.0 | 1.2E-05 | 1.0 | 2.0 |
| ATG4C     | 1.1 | 4.9E-06 | 0.9 | 1.6E-04 | 1.0 | 2.0 |
| DNM3      | 1.2 | 8.1E-07 | 0.8 | 5.2E-04 | 1.0 | 2.0 |
| RQCD1     | 1.0 | 9.1E-06 | 1.0 | 1.9E-05 | 1.0 | 2.0 |
| GPR75     | 1.0 | 3.3E-04 | 1.0 | 4.4E-04 | 1.0 | 2.0 |
| HIGD1A    | 1.0 | 7.3E-06 | 0.9 | 1.9E-05 | 1.0 | 2.0 |
| IMMP2L    | 1.1 | 1.1E-06 | 0.8 | 1.2E-04 | 1.0 | 2.0 |
| MRPL44    | 1.0 | 1.1E-05 | 1.0 | 1.4E-05 | 1.0 | 2.0 |
| TCP11L1   | 1.0 | 1.6E-05 | 0.9 | 5.4E-05 | 1.0 | 2.0 |
| NDUFAF1   | 1.0 | 6.2E-06 | 0.9 | 2.4E-05 | 1.0 | 2.0 |
| MTL5      | 1.1 | 4.2E-06 | 0.9 | 7.2E-05 | 1.0 | 2.0 |
| ACTR1A    | 1.1 | 2.9E-06 | 0.9 | 6.8E-05 | 1.0 | 2.0 |
| RBM45     | 1.0 | 6.6E-06 | 0.9 | 2.7E-05 | 1.0 | 2.0 |
| UBE2U     | 1.1 | 1.1E-05 | 0.8 | 4.5E-04 | 1.0 | 2.0 |
| ATXN3     | 1.0 | 8.8E-06 | 0.9 | 2.1E-05 | 1.0 | 2.0 |
| NBPF14    | 1.1 | 2.8E-06 | 0.9 | 6.2E-05 | 1.0 | 2.0 |
| KIR3DL1   | 0.8 | 1.8E-04 | 1.1 | 2.6E-06 | 1.0 | 2.0 |
| LAMC3     | 0.8 | 1.5E-04 | 1.1 | 1.4E-06 | 1.0 | 2.0 |
| CABP5     | 0.9 | 1.5E-04 | 1.1 | 5.8E-06 | 1.0 | 2.0 |
| SLC25A4   | 1.0 | 5.6E-06 | 0.9 | 3.3E-05 | 1.0 | 2.0 |
| SENP5     | 0.9 | 6.6E-05 | 1.0 | 1.4E-05 | 1.0 | 2.0 |
| ZNF57     | 1.2 | 2.3E-07 | 0.7 | 8.5E-04 | 1.0 | 2.0 |
| GRPEL2    | 1.0 | 8.1E-06 | 0.9 | 3.7E-05 | 1.0 | 2.0 |
| NAP1L1    | 1.1 | 2.1E-06 | 0.9 | 9.2E-05 | 1.0 | 2.0 |
| EIF4ENIF1 | 1.0 | 1.0E-05 | 0.9 | 2.1E-05 | 1.0 | 2.0 |
| DNAJB4    | 1.1 | 2.5E-06 | 0.9 | 9.3E-05 | 1.0 | 2.0 |
| BTBD7     | 1.0 | 1.5E-05 | 1.0 | 1.4E-05 | 1.0 | 2.0 |
| PNMA3     | 0.9 | 3.1E-05 | 1.0 | 6.9E-06 | 1.0 | 1.9 |
| EIF5A2    | 0.8 | 3.0E-04 | 1.1 | 3.3E-06 | 1.0 | 1.9 |
| PDE6A     | 1.0 | 1.3E-05 | 1.0 | 1.6E-05 | 1.0 | 1.9 |
| MOXD1     | 1.0 | 5.6E-06 | 0.9 | 4.9E-05 | 1.0 | 1.9 |
| AGAP1     | 0.9 | 2.3E-05 | 1.0 | 1.3E-05 | 1.0 | 1.9 |
| CYP26B1   | 0.9 | 6.9E-05 | 1.0 | 4.5E-06 | 1.0 | 1.9 |
| PARD6A    | 1.1 | 5.7E-07 | 0.8 | 3.4E-04 | 1.0 | 1.9 |
| R3HDM2    | 1.0 | 1.7E-05 | 1.0 | 1.4E-05 | 1.0 | 1.9 |
| LY86      | 0.8 | 4.4E-04 | 1.2 | 6.3E-07 | 1.0 | 1.9 |
| CROCC     | 0.8 | 4.7E-04 | 1.1 | 4.6E-06 | 1.0 | 1.9 |
| AP1G2     | 1.0 | 1.0E-05 | 0.9 | 3.2E-05 | 1.0 | 1.9 |
| SEC14L1   | 0.8 | 1.1E-04 | 1.1 | 2.1E-06 | 1.0 | 1.9 |
| APAF1     | 1.0 | 1.0E-05 | 0.9 | 5.8E-05 | 1.0 | 1.9 |
| RAPGEF6   | 1.0 | 5.7E-06 | 0.9 | 4.4E-05 | 1.0 | 1.9 |
| PIAS3     | 1.1 | 3.1E-06 | 0.9 | 8.1E-05 | 1.0 | 1.9 |
| GALR3     | 0.8 | 1.0E-04 | 1.1 | 2.4E-06 | 1.0 | 1.9 |
| TPD52     | 1.0 | 1.4E-05 | 0.9 | 1.9E-05 | 1.0 | 1.9 |
| NAE1      | 0.8 | 2.0E-04 | 1.1 | 1.2E-06 | 1.0 | 1.9 |
| LYPLA1    | 1.0 | 6.7E-06 | 0.9 | 4.2E-05 | 1.0 | 1.9 |

|            |     |         |     |         |     |     |
|------------|-----|---------|-----|---------|-----|-----|
| FIGF       | 1.0 | 1.4E-05 | 0.9 | 1.5E-04 | 1.0 | 1.9 |
| PGM5P1     | 0.8 | 2.5E-04 | 1.1 | 9.9E-07 | 1.0 | 1.9 |
| NOL11      | 1.0 | 3.4E-06 | 0.9 | 8.5E-05 | 1.0 | 1.9 |
| C3orf39    | 0.9 | 7.9E-05 | 1.0 | 3.5E-06 | 1.0 | 1.9 |
| IL10RA     | 1.1 | 3.2E-06 | 0.9 | 9.9E-05 | 1.0 | 1.9 |
| SCG2       | 1.0 | 1.5E-04 | 0.9 | 2.4E-04 | 1.0 | 1.9 |
| LDHA       | 1.0 | 3.5E-06 | 0.9 | 9.2E-05 | 1.0 | 1.9 |
| RPL7L1     | 1.0 | 8.4E-06 | 0.9 | 4.2E-05 | 0.9 | 1.9 |
| RALGPS1    | 0.9 | 7.2E-05 | 1.0 | 2.2E-05 | 0.9 | 1.9 |
| PCMTD2     | 0.8 | 1.1E-04 | 1.1 | 3.0E-06 | 0.9 | 1.9 |
| SEPT6      | 1.0 | 1.9E-05 | 0.9 | 1.3E-04 | 0.9 | 1.9 |
| PTPDC1     | 1.1 | 5.0E-06 | 0.8 | 1.3E-04 | 0.9 | 1.9 |
| NOP16      | 1.1 | 2.8E-06 | 0.8 | 1.2E-04 | 0.9 | 1.9 |
| C9orf163   | 1.0 | 2.7E-05 | 0.9 | 2.3E-05 | 0.9 | 1.9 |
| SCHIP1     | 1.0 | 1.8E-05 | 0.9 | 2.1E-05 | 0.9 | 1.9 |
| VIPAR      | 1.0 | 6.0E-06 | 0.9 | 6.4E-05 | 0.9 | 1.9 |
| PGM2       | 0.9 | 8.7E-05 | 1.0 | 4.1E-06 | 0.9 | 1.9 |
| DLST       | 1.0 | 1.8E-05 | 0.9 | 2.2E-05 | 0.9 | 1.9 |
| OGFRL1     | 1.1 | 3.4E-06 | 0.8 | 1.8E-04 | 0.9 | 1.9 |
| C12orf51   | 1.1 | 3.1E-06 | 0.8 | 2.5E-04 | 0.9 | 1.9 |
| SUPT3H     | 0.9 | 2.8E-05 | 1.0 | 1.5E-05 | 0.9 | 1.9 |
| ZNF664     | 1.0 | 4.6E-06 | 0.9 | 8.6E-05 | 0.9 | 1.9 |
| MRPS6      | 0.8 | 1.2E-04 | 1.0 | 3.2E-06 | 0.9 | 1.9 |
| CLASRP     | 1.0 | 5.4E-06 | 0.9 | 7.4E-05 | 0.9 | 1.9 |
| KIAA0090   | 0.9 | 3.7E-05 | 0.9 | 2.7E-05 | 0.9 | 1.9 |
| GOSR1      | 0.8 | 1.3E-04 | 1.1 | 3.0E-06 | 0.9 | 1.9 |
| HMGCS1     | 1.1 | 1.9E-04 | 0.8 | 8.0E-04 | 0.9 | 1.9 |
| TRIT1      | 1.1 | 1.7E-06 | 0.8 | 2.4E-04 | 0.9 | 1.9 |
| RIT1       | 1.0 | 1.0E-05 | 0.9 | 4.5E-05 | 0.9 | 1.9 |
| ACOT13     | 1.0 | 5.8E-06 | 0.9 | 7.6E-05 | 0.9 | 1.9 |
| CRYBG3     | 1.2 | 5.0E-07 | 0.7 | 7.3E-04 | 0.9 | 1.9 |
| FAM104B    | 1.0 | 1.9E-05 | 0.9 | 2.6E-05 | 0.9 | 1.9 |
| RAB8B      | 0.9 | 5.3E-05 | 1.0 | 1.1E-05 | 0.9 | 1.9 |
| GDF6       | 1.0 | 4.0E-04 | 0.9 | 3.2E-04 | 0.9 | 1.9 |
| CCAR1      | 0.8 | 2.8E-04 | 1.1 | 1.6E-06 | 0.9 | 1.9 |
| NFYA       | 1.0 | 7.8E-06 | 0.9 | 7.7E-05 | 0.9 | 1.9 |
| ATXN2      | 0.9 | 3.8E-05 | 1.0 | 2.7E-05 | 0.9 | 1.9 |
| ZNF137P    | 1.0 | 8.5E-06 | 0.8 | 1.8E-04 | 0.9 | 1.9 |
| PCNT       | 1.0 | 1.6E-05 | 0.9 | 3.4E-05 | 0.9 | 1.9 |
| PROP1      | 0.8 | 1.7E-04 | 1.0 | 4.2E-06 | 0.9 | 1.9 |
| NDUFA6     | 0.9 | 7.6E-05 | 1.0 | 6.9E-06 | 0.9 | 1.9 |
| ATP9B      | 1.1 | 1.5E-06 | 0.8 | 3.3E-04 | 0.9 | 1.9 |
| GRB2       | 1.0 | 1.6E-05 | 0.9 | 3.8E-05 | 0.9 | 1.9 |
| IGDCC4     | 0.9 | 4.1E-05 | 1.0 | 1.5E-05 | 0.9 | 1.9 |
| HLTF       | 1.0 | 7.8E-06 | 0.8 | 1.3E-04 | 0.9 | 1.9 |
| OXSR1      | 1.1 | 5.7E-07 | 0.7 | 7.6E-04 | 0.9 | 1.9 |
| STRN4      | 0.8 | 3.7E-04 | 1.1 | 1.4E-06 | 0.9 | 1.9 |
| C1orf31    | 0.9 | 2.4E-05 | 0.9 | 2.4E-05 | 0.9 | 1.9 |
| ISCA2      | 1.0 | 1.5E-05 | 0.9 | 3.8E-05 | 0.9 | 1.9 |
| HBG1       | 1.0 | 4.2E-05 | 0.9 | 2.5E-04 | 0.9 | 1.9 |
| MGA        | 0.9 | 3.8E-05 | 1.0 | 1.6E-05 | 0.9 | 1.9 |
| DEDD2      | 0.8 | 4.3E-04 | 1.1 | 4.8E-06 | 0.9 | 1.9 |
| AP2B1      | 0.9 | 3.2E-05 | 0.9 | 2.2E-05 | 0.9 | 1.9 |
| KDM4A      | 0.9 | 8.1E-05 | 1.0 | 1.3E-05 | 0.9 | 1.9 |
| POLG2      | 1.0 | 5.3E-06 | 0.8 | 1.1E-04 | 0.9 | 1.9 |
| NARF       | 1.0 | 8.4E-06 | 0.9 | 7.1E-05 | 0.9 | 1.9 |
| ARL3       | 1.0 | 1.4E-05 | 0.9 | 4.6E-05 | 0.9 | 1.9 |
| ADAM10     | 0.8 | 1.8E-04 | 1.0 | 5.5E-06 | 0.9 | 1.9 |
| MRC1L1     | 1.0 | 8.1E-06 | 0.9 | 9.6E-05 | 0.9 | 1.9 |
| C1QA       | 0.9 | 2.0E-05 | 0.9 | 3.3E-05 | 0.9 | 1.9 |
| NCRNA00115 | 0.9 | 3.3E-05 | 0.9 | 3.6E-05 | 0.9 | 1.9 |
| TRIP12     | 1.0 | 1.6E-05 | 0.9 | 4.1E-05 | 0.9 | 1.9 |

|           |     |         |     |         |     |     |
|-----------|-----|---------|-----|---------|-----|-----|
| NRD1      | 0.8 | 1.4E-04 | 1.0 | 4.6E-06 | 0.9 | 1.9 |
| LPGAT1    | 0.8 | 3.3E-04 | 1.1 | 3.9E-06 | 0.9 | 1.9 |
| EPN2      | 1.0 | 1.0E-05 | 0.9 | 6.7E-05 | 0.9 | 1.9 |
| DR1       | 1.1 | 3.4E-06 | 0.8 | 2.9E-04 | 0.9 | 1.9 |
| CYP4F11   | 1.0 | 6.8E-05 | 0.8 | 6.1E-04 | 0.9 | 1.9 |
| CD68      | 0.9 | 5.2E-05 | 0.9 | 2.6E-05 | 0.9 | 1.9 |
| EIF4A2    | 0.9 | 5.2E-05 | 0.9 | 2.6E-05 | 0.9 | 1.9 |
| SNORA4    | 0.9 | 5.2E-05 | 0.9 | 2.6E-05 | 0.9 | 1.9 |
| MRFAP1L1  | 0.9 | 4.9E-05 | 1.0 | 1.6E-05 | 0.9 | 1.9 |
| RBM6      | 1.0 | 1.1E-05 | 0.9 | 7.3E-05 | 0.9 | 1.9 |
| ZMYM2     | 1.0 | 5.8E-06 | 0.8 | 1.3E-04 | 0.9 | 1.9 |
| GNL3      | 0.8 | 1.1E-04 | 1.0 | 6.8E-06 | 0.9 | 1.9 |
| DUSP22    | 1.0 | 7.5E-06 | 0.8 | 1.0E-04 | 0.9 | 1.9 |
| RSF1      | 1.1 | 2.6E-06 | 0.8 | 3.8E-04 | 0.9 | 1.9 |
| SREK1     | 0.8 | 3.5E-04 | 1.0 | 4.4E-06 | 0.9 | 1.9 |
| SHROOM1   | 1.0 | 2.0E-05 | 0.8 | 1.4E-04 | 0.9 | 1.9 |
| ZFP90     | 1.0 | 1.8E-04 | 0.9 | 6.0E-04 | 0.9 | 1.9 |
| RFX2      | 1.0 | 6.7E-06 | 0.8 | 1.6E-04 | 0.9 | 1.9 |
| C12orf23  | 0.9 | 5.7E-05 | 1.0 | 1.7E-05 | 0.9 | 1.9 |
| HDHD2     | 1.1 | 2.2E-06 | 0.8 | 3.8E-04 | 0.9 | 1.9 |
| ZNF354B   | 1.0 | 4.1E-05 | 0.9 | 9.8E-05 | 0.9 | 1.9 |
| CTTN      | 1.1 | 3.4E-06 | 0.8 | 3.5E-04 | 0.9 | 1.9 |
| FAM173B   | 1.0 | 8.8E-06 | 0.8 | 1.3E-04 | 0.9 | 1.9 |
| ZNF37A    | 0.9 | 4.3E-05 | 0.9 | 6.1E-05 | 0.9 | 1.9 |
| CCDC114   | 0.9 | 8.7E-05 | 1.0 | 2.2E-05 | 0.9 | 1.9 |
| CCNJ      | 0.9 | 6.5E-05 | 1.0 | 1.6E-05 | 0.9 | 1.9 |
| RPAP1     | 0.9 | 5.1E-05 | 0.9 | 2.1E-05 | 0.9 | 1.9 |
| TPMT      | 1.0 | 1.1E-05 | 0.8 | 1.4E-04 | 0.9 | 1.9 |
| IL9R      | 0.8 | 2.1E-04 | 1.0 | 1.5E-05 | 0.9 | 1.9 |
| MDFI      | 1.1 | 8.2E-06 | 0.8 | 6.8E-04 | 0.9 | 1.9 |
| PPP1R14A  | 0.9 | 2.5E-05 | 0.9 | 4.4E-05 | 0.9 | 1.9 |
| TBCK      | 1.0 | 1.1E-05 | 0.8 | 1.8E-04 | 0.9 | 1.9 |
| TRNT1     | 1.0 | 7.6E-05 | 0.9 | 3.7E-04 | 0.9 | 1.9 |
| HABP4     | 0.9 | 6.8E-05 | 1.0 | 1.7E-05 | 0.9 | 1.9 |
| YTHDF3    | 1.0 | 5.0E-05 | 0.9 | 9.6E-05 | 0.9 | 1.9 |
| HNRNPC    | 0.9 | 6.7E-05 | 1.0 | 1.7E-05 | 0.9 | 1.9 |
| MAFG      | 0.9 | 5.6E-04 | 0.9 | 1.4E-04 | 0.9 | 1.9 |
| C14orf109 | 1.0 | 1.2E-05 | 0.8 | 1.4E-04 | 0.9 | 1.9 |
| TNFAIP8   | 1.0 | 1.2E-05 | 0.8 | 1.4E-04 | 0.9 | 1.9 |
| ZNF512    | 1.0 | 1.1E-05 | 0.8 | 1.8E-04 | 0.9 | 1.9 |
| SAAL1     | 1.0 | 1.1E-05 | 0.8 | 1.2E-04 | 0.9 | 1.9 |
| ZNF512B   | 1.0 | 6.2E-06 | 0.8 | 2.0E-04 | 0.9 | 1.9 |
| ARFGEF1   | 1.0 | 1.5E-05 | 0.9 | 8.7E-05 | 0.9 | 1.9 |
| TSPAN31   | 0.9 | 4.9E-05 | 0.9 | 3.1E-05 | 0.9 | 1.9 |
| SUPT16H   | 1.1 | 1.7E-06 | 0.7 | 6.4E-04 | 0.9 | 1.9 |
| SDCBP     | 1.0 | 6.0E-06 | 0.8 | 2.1E-04 | 0.9 | 1.9 |
| GPSM1     | 0.9 | 2.1E-05 | 0.9 | 6.7E-05 | 0.9 | 1.9 |
| LOH12CR1  | 0.9 | 4.1E-05 | 0.9 | 3.8E-05 | 0.9 | 1.9 |
| SRSF1     | 1.1 | 3.1E-06 | 0.8 | 3.9E-04 | 0.9 | 1.9 |
| CD53      | 0.8 | 1.1E-04 | 1.0 | 1.4E-05 | 0.9 | 1.9 |
| ZNF142    | 0.9 | 3.0E-05 | 0.9 | 7.6E-05 | 0.9 | 1.9 |
| NGLY1     | 0.8 | 2.4E-04 | 1.0 | 5.7E-06 | 0.9 | 1.9 |
| NIPSNAP3A | 0.8 | 4.6E-04 | 1.1 | 3.1E-06 | 0.9 | 1.9 |
| RSU1      | 0.9 | 2.8E-05 | 0.9 | 5.5E-05 | 0.9 | 1.9 |
| ZNF320    | 0.9 | 1.4E-04 | 0.9 | 7.3E-05 | 0.9 | 1.9 |
| ZNF180    | 1.0 | 1.4E-05 | 0.8 | 1.3E-04 | 0.9 | 1.9 |
| ZNF200    | 1.1 | 2.4E-06 | 0.7 | 6.4E-04 | 0.9 | 1.9 |
| SUZ12     | 1.0 | 9.8E-06 | 0.8 | 1.6E-04 | 0.9 | 1.9 |
| TMCO6     | 0.8 | 2.3E-04 | 1.0 | 8.2E-06 | 0.9 | 1.9 |
| SNAPC3    | 1.0 | 1.9E-05 | 0.8 | 1.8E-04 | 0.9 | 1.9 |
| C16orf61  | 0.9 | 3.6E-05 | 0.9 | 4.6E-05 | 0.9 | 1.9 |
| AP3D1     | 0.8 | 1.2E-04 | 1.0 | 1.3E-05 | 0.9 | 1.9 |

|          |     |         |     |         |     |     |
|----------|-----|---------|-----|---------|-----|-----|
| BCL3     | 0.9 | 4.4E-05 | 0.9 | 3.9E-05 | 0.9 | 1.9 |
| RPS6KL1  | 0.8 | 2.2E-04 | 1.0 | 7.6E-06 | 0.9 | 1.9 |
| ZNF575   | 1.0 | 6.4E-06 | 0.8 | 4.5E-04 | 0.9 | 1.9 |
| STX10    | 0.9 | 6.1E-05 | 0.9 | 2.9E-05 | 0.9 | 1.9 |
| KRTAP2-1 | 0.8 | 3.2E-04 | 1.0 | 5.1E-06 | 0.9 | 1.9 |
| LUC7L    | 0.9 | 5.5E-05 | 0.9 | 3.8E-05 | 0.9 | 1.9 |
| CHRD12   | 1.0 | 1.2E-05 | 0.8 | 5.9E-04 | 0.9 | 1.9 |
| ARL4C    | 1.0 | 7.2E-06 | 0.8 | 4.3E-04 | 0.9 | 1.9 |
| RWDD3    | 1.0 | 8.9E-06 | 0.8 | 2.3E-04 | 0.9 | 1.9 |
| SALL2    | 0.9 | 3.2E-05 | 0.9 | 6.1E-05 | 0.9 | 1.9 |
| ZNF532   | 1.0 | 8.4E-06 | 0.7 | 5.4E-04 | 0.9 | 1.9 |
| FZD2     | 1.0 | 5.5E-06 | 0.8 | 3.7E-04 | 0.9 | 1.9 |
| TXNL1    | 1.0 | 7.3E-06 | 0.8 | 2.6E-04 | 0.9 | 1.9 |
| TDRD3    | 0.8 | 1.2E-04 | 1.0 | 1.7E-05 | 0.9 | 1.9 |
| SDR39U1  | 0.9 | 5.9E-05 | 0.9 | 3.5E-05 | 0.9 | 1.9 |
| PLSCR3   | 1.0 | 1.3E-05 | 0.8 | 1.6E-04 | 0.9 | 1.9 |
| N6AMT1   | 0.9 | 3.6E-05 | 0.9 | 9.6E-05 | 0.9 | 1.9 |
| SNW1     | 1.0 | 5.9E-06 | 0.8 | 3.4E-04 | 0.9 | 1.9 |
| AGGF1    | 1.0 | 6.4E-06 | 0.8 | 3.3E-04 | 0.9 | 1.9 |
| C1orf163 | 0.9 | 7.0E-05 | 0.9 | 7.9E-05 | 0.9 | 1.9 |
| SKIV2L2  | 1.0 | 6.7E-06 | 0.8 | 3.1E-04 | 0.9 | 1.9 |
| FLAD1    | 1.0 | 9.4E-06 | 0.8 | 3.6E-04 | 0.9 | 1.9 |
| TAF11    | 1.0 | 8.6E-06 | 0.8 | 2.6E-04 | 0.9 | 1.9 |
| RHOT1    | 0.8 | 2.1E-04 | 1.0 | 1.1E-05 | 0.9 | 1.9 |
| LOC80054 | 0.8 | 1.7E-04 | 1.0 | 1.5E-05 | 0.9 | 1.9 |
| FAM158A  | 1.0 | 8.4E-06 | 0.8 | 3.1E-04 | 0.9 | 1.9 |
| PLA2G4B  | 0.8 | 1.4E-04 | 1.0 | 1.8E-05 | 0.9 | 1.9 |
| LOXL2    | 0.9 | 4.4E-05 | 0.9 | 6.1E-05 | 0.9 | 1.9 |
| EFTUD1   | 0.8 | 1.1E-04 | 0.9 | 2.3E-05 | 0.9 | 1.9 |
| SNX24    | 1.0 | 2.3E-05 | 0.8 | 6.6E-04 | 0.9 | 1.9 |
| SLC2A13  | 0.9 | 7.0E-05 | 0.8 | 2.3E-04 | 0.9 | 1.9 |
| TMEM167A | 0.9 | 9.2E-05 | 0.9 | 4.1E-05 | 0.9 | 1.9 |
| RASSF7   | 0.7 | 8.1E-04 | 1.1 | 2.8E-06 | 0.9 | 1.9 |
| SLC6A3   | 0.9 | 2.0E-04 | 0.9 | 1.5E-04 | 0.9 | 1.9 |
| SRPK2    | 1.0 | 8.3E-06 | 0.8 | 5.4E-04 | 0.9 | 1.9 |
| CDK10    | 0.8 | 3.7E-04 | 1.0 | 1.0E-05 | 0.9 | 1.9 |
| ZNF184   | 1.0 | 1.4E-05 | 0.8 | 2.1E-04 | 0.9 | 1.9 |
| FOXF2    | 0.8 | 4.6E-04 | 1.0 | 9.3E-06 | 0.9 | 1.8 |
| SNRPD1   | 0.9 | 4.0E-05 | 0.9 | 7.3E-05 | 0.9 | 1.8 |
| C14orf80 | 1.0 | 1.7E-05 | 0.8 | 1.7E-04 | 0.9 | 1.8 |
| EXT2     | 1.0 | 9.5E-06 | 0.8 | 3.0E-04 | 0.9 | 1.8 |
| PGAP2    | 0.9 | 8.9E-05 | 0.9 | 3.4E-05 | 0.9 | 1.8 |
| ZFP1     | 1.0 | 6.0E-06 | 0.7 | 8.1E-04 | 0.9 | 1.8 |
| NLGN2    | 0.9 | 3.3E-05 | 0.8 | 1.1E-04 | 0.9 | 1.8 |
| ZMPSTE24 | 0.9 | 2.4E-05 | 0.8 | 1.3E-04 | 0.9 | 1.8 |
| DGCR8    | 0.8 | 1.9E-04 | 0.9 | 2.2E-05 | 0.9 | 1.8 |
| PHF17    | 1.0 | 8.3E-06 | 0.8 | 3.5E-04 | 0.9 | 1.8 |
| ZNF74    | 1.0 | 1.0E-05 | 0.8 | 4.2E-04 | 0.9 | 1.8 |
| PDE6D    | 0.9 | 4.1E-05 | 0.9 | 9.4E-05 | 0.9 | 1.8 |
| WRAP53   | 0.9 | 4.5E-05 | 0.9 | 9.4E-05 | 0.9 | 1.8 |
| IPP      | 0.9 | 9.9E-05 | 0.9 | 6.2E-05 | 0.9 | 1.8 |
| GALNT1   | 1.0 | 4.1E-06 | 0.7 | 7.5E-04 | 0.9 | 1.8 |
| TIMM8B   | 0.9 | 3.0E-05 | 0.8 | 1.2E-04 | 0.9 | 1.8 |
| CEP290   | 1.0 | 5.7E-06 | 0.7 | 6.3E-04 | 0.9 | 1.8 |
| C5orf44  | 0.7 | 6.1E-04 | 1.0 | 7.3E-06 | 0.9 | 1.8 |
| MARCH5   | 1.0 | 9.8E-06 | 0.8 | 3.8E-04 | 0.9 | 1.8 |
| AGER     | 0.9 | 3.5E-05 | 0.8 | 1.6E-04 | 0.9 | 1.8 |
| ZNF259   | 0.9 | 4.7E-05 | 0.9 | 9.0E-05 | 0.9 | 1.8 |
| CYP4F8   | 0.9 | 7.3E-05 | 0.9 | 9.3E-05 | 0.9 | 1.8 |
| PNPLA2   | 0.7 | 8.4E-04 | 1.0 | 4.4E-06 | 0.9 | 1.8 |
| FAM189B  | 0.9 | 5.2E-05 | 0.9 | 8.9E-05 | 0.9 | 1.8 |
| EPM2AIP1 | 0.9 | 8.0E-05 | 0.9 | 5.7E-05 | 0.9 | 1.8 |

|          |     |         |     |         |     |     |
|----------|-----|---------|-----|---------|-----|-----|
| C11orf48 | 0.9 | 2.8E-05 | 0.8 | 1.6E-04 | 0.9 | 1.8 |
| ZMAT2    | 0.9 | 2.3E-05 | 0.8 | 1.9E-04 | 0.9 | 1.8 |
| GPBP1L1  | 1.0 | 1.8E-05 | 0.8 | 2.5E-04 | 0.9 | 1.8 |
| HPS1     | 0.9 | 6.0E-05 | 0.9 | 1.1E-04 | 0.9 | 1.8 |
| CHKA     | 0.8 | 3.4E-04 | 1.0 | 1.4E-05 | 0.9 | 1.8 |
| CDC42BPA | 0.8 | 3.1E-04 | 1.0 | 1.7E-05 | 0.9 | 1.8 |
| SCYL2    | 0.8 | 1.2E-04 | 0.9 | 4.2E-05 | 0.9 | 1.8 |
| GEMIN5   | 0.9 | 8.2E-05 | 0.9 | 7.0E-05 | 0.9 | 1.8 |
| MARCH7   | 1.0 | 6.0E-06 | 0.7 | 7.6E-04 | 0.9 | 1.8 |
| CPNE3    | 0.9 | 4.0E-05 | 0.8 | 1.9E-04 | 0.9 | 1.8 |
| BCOR     | 0.7 | 6.5E-04 | 1.0 | 8.0E-06 | 0.9 | 1.8 |
| RAB31    | 0.9 | 7.2E-05 | 0.9 | 7.4E-05 | 0.9 | 1.8 |
| ETFDH    | 0.9 | 7.5E-05 | 0.9 | 7.7E-05 | 0.9 | 1.8 |
| MYH3     | 1.0 | 2.1E-05 | 0.8 | 4.1E-04 | 0.9 | 1.8 |
| CLCC1    | 0.8 | 1.2E-04 | 0.9 | 4.7E-05 | 0.9 | 1.8 |
| CFDP1    | 0.9 | 2.5E-05 | 0.8 | 2.2E-04 | 0.9 | 1.8 |
| AIDA     | 0.8 | 2.7E-04 | 0.9 | 2.1E-05 | 0.9 | 1.8 |
| ADAT1    | 0.9 | 1.2E-04 | 0.8 | 1.5E-04 | 0.9 | 1.8 |
| IGSF8    | 0.9 | 6.5E-05 | 0.9 | 9.3E-05 | 0.9 | 1.8 |
| MRPL15   | 1.0 | 1.8E-05 | 0.8 | 3.2E-04 | 0.9 | 1.8 |
| ALG13    | 0.7 | 5.2E-04 | 1.0 | 1.1E-05 | 0.9 | 1.8 |
| BPGM     | 0.9 | 3.2E-05 | 0.8 | 2.1E-04 | 0.9 | 1.8 |
| MTHFS    | 0.9 | 9.9E-05 | 0.9 | 6.4E-05 | 0.9 | 1.8 |
| EIF2C4   | 0.9 | 8.8E-04 | 0.9 | 4.5E-04 | 0.9 | 1.8 |
| PRKDC    | 1.0 | 1.8E-05 | 0.8 | 3.8E-04 | 0.9 | 1.8 |
| EIF2C3   | 0.8 | 2.8E-04 | 0.9 | 2.6E-05 | 0.9 | 1.8 |
| MINK1    | 0.8 | 2.7E-04 | 0.9 | 7.4E-05 | 0.9 | 1.8 |
| ASAP2    | 0.9 | 1.3E-04 | 0.8 | 5.1E-04 | 0.9 | 1.8 |
| NDUFS5   | 0.8 | 3.3E-04 | 0.9 | 2.0E-05 | 0.9 | 1.8 |
| BRWD3    | 0.9 | 3.5E-05 | 0.8 | 2.3E-04 | 0.9 | 1.8 |
| C16orf7  | 0.7 | 7.1E-04 | 1.0 | 1.4E-05 | 0.9 | 1.8 |
| ZNF776   | 1.0 | 9.7E-05 | 0.8 | 8.1E-04 | 0.9 | 1.8 |
| PNPLA3   | 0.8 | 2.3E-04 | 0.9 | 3.8E-05 | 0.9 | 1.8 |
| CCND2    | 1.0 | 2.0E-05 | 0.7 | 9.6E-04 | 0.9 | 1.8 |
| GAA      | 1.0 | 1.6E-05 | 0.8 | 4.4E-04 | 0.9 | 1.8 |
| SUFU     | 0.8 | 8.0E-04 | 0.9 | 9.2E-05 | 0.9 | 1.8 |
| SREK1IP1 | 0.8 | 4.3E-04 | 1.0 | 1.7E-05 | 0.9 | 1.8 |
| MYL5     | 1.0 | 1.4E-05 | 0.7 | 9.1E-04 | 0.9 | 1.8 |
| SRGN     | 1.0 | 1.3E-05 | 0.7 | 5.6E-04 | 0.9 | 1.8 |
| RBMS2    | 1.0 | 1.0E-05 | 0.7 | 9.5E-04 | 0.9 | 1.8 |
| HNRNPH3  | 1.0 | 9.1E-06 | 0.7 | 8.1E-04 | 0.9 | 1.8 |
| TBKBP1   | 0.7 | 7.6E-04 | 1.0 | 1.2E-05 | 0.9 | 1.8 |
| C6orf129 | 0.9 | 3.6E-05 | 0.8 | 2.5E-04 | 0.9 | 1.8 |
| DYNC2H1  | 0.8 | 1.7E-04 | 0.9 | 7.8E-05 | 0.9 | 1.8 |
| FCGR2B   | 0.9 | 2.0E-05 | 0.8 | 4.6E-04 | 0.9 | 1.8 |
| WSB1     | 0.8 | 1.9E-04 | 0.9 | 4.7E-05 | 0.9 | 1.8 |
| ZNF544   | 0.9 | 2.0E-05 | 0.8 | 4.7E-04 | 0.9 | 1.8 |
| UGT2B10  | 0.8 | 7.3E-04 | 0.9 | 2.9E-05 | 0.9 | 1.8 |
| TRAPPC4  | 0.9 | 6.2E-05 | 0.8 | 1.6E-04 | 0.8 | 1.8 |
| KPNA4    | 0.9 | 1.7E-04 | 0.8 | 5.0E-04 | 0.8 | 1.8 |
| RBM15B   | 1.0 | 1.3E-05 | 0.7 | 7.1E-04 | 0.8 | 1.8 |
| LCE1A    | 0.7 | 8.0E-04 | 1.0 | 1.2E-05 | 0.8 | 1.8 |
| ATG10    | 0.9 | 3.1E-04 | 0.8 | 5.5E-04 | 0.8 | 1.8 |
| PUS7     | 0.7 | 6.1E-04 | 1.0 | 1.7E-05 | 0.8 | 1.8 |
| CLIC4    | 0.8 | 4.8E-04 | 0.9 | 3.1E-05 | 0.8 | 1.8 |
| ZNF253   | 0.9 | 7.8E-05 | 0.8 | 1.7E-04 | 0.8 | 1.8 |
| CNOT7    | 0.8 | 2.7E-04 | 0.9 | 4.8E-05 | 0.8 | 1.8 |
| TP63     | 1.0 | 1.3E-05 | 0.7 | 9.7E-04 | 0.8 | 1.8 |
| MYO5A    | 0.8 | 5.9E-04 | 0.8 | 5.5E-04 | 0.8 | 1.8 |
| AGTPBP1  | 0.8 | 1.6E-04 | 0.9 | 9.1E-05 | 0.8 | 1.8 |
| BMF      | 0.8 | 1.5E-04 | 0.8 | 1.0E-04 | 0.8 | 1.8 |
| SERINC1  | 0.8 | 1.9E-04 | 0.9 | 8.6E-05 | 0.8 | 1.8 |

|              |     |         |     |         |     |     |
|--------------|-----|---------|-----|---------|-----|-----|
| HYPK         | 0.7 | 5.7E-04 | 0.9 | 2.9E-05 | 0.8 | 1.8 |
| HSPB6        | 0.8 | 8.8E-04 | 0.9 | 1.5E-04 | 0.8 | 1.8 |
| FARP1        | 0.7 | 5.1E-04 | 0.9 | 3.9E-05 | 0.8 | 1.8 |
| EXOC2        | 0.8 | 3.8E-04 | 0.9 | 5.0E-05 | 0.8 | 1.8 |
| DHRS13       | 0.8 | 2.0E-04 | 0.8 | 1.5E-04 | 0.8 | 1.8 |
| BFAR         | 0.9 | 2.2E-05 | 0.7 | 8.3E-04 | 0.8 | 1.8 |
| FXR2         | 0.9 | 1.5E-04 | 0.8 | 7.1E-04 | 0.8 | 1.8 |
| DKFZp434F142 | 0.9 | 9.0E-05 | 0.8 | 2.4E-04 | 0.8 | 1.8 |
| KCTD1        | 0.8 | 1.7E-04 | 0.8 | 1.2E-04 | 0.8 | 1.8 |
| BEX2         | 0.8 | 1.0E-04 | 0.8 | 2.0E-04 | 0.8 | 1.8 |
| CNTROB       | 0.8 | 2.0E-04 | 0.8 | 1.4E-04 | 0.8 | 1.8 |
| ZC3H14       | 0.8 | 7.6E-04 | 0.8 | 2.8E-04 | 0.8 | 1.8 |
| TTC28        | 0.9 | 2.0E-05 | 0.7 | 9.8E-04 | 0.8 | 1.8 |
| UQCR11       | 0.9 | 3.1E-05 | 0.7 | 6.6E-04 | 0.8 | 1.8 |
| UBE2S        | 0.9 | 1.0E-04 | 0.8 | 2.3E-04 | 0.8 | 1.8 |
| PLEKHO1      | 0.8 | 2.6E-04 | 0.9 | 8.6E-05 | 0.8 | 1.8 |
| GLOD4        | 0.8 | 4.0E-04 | 0.9 | 5.5E-05 | 0.8 | 1.8 |
| CORO1C       | 0.9 | 4.0E-05 | 0.7 | 6.4E-04 | 0.8 | 1.8 |
| ZNF610       | 0.9 | 3.5E-04 | 0.8 | 6.9E-04 | 0.8 | 1.8 |
| NUDT11       | 0.9 | 7.1E-05 | 0.8 | 4.0E-04 | 0.8 | 1.8 |
| NDUFS3       | 0.8 | 3.0E-04 | 0.9 | 7.8E-05 | 0.8 | 1.8 |
| SUGP2        | 0.9 | 9.7E-05 | 0.8 | 3.6E-04 | 0.8 | 1.8 |
| EML2         | 0.9 | 8.6E-05 | 0.8 | 4.7E-04 | 0.8 | 1.8 |
| OCLN         | 0.9 | 6.8E-05 | 0.7 | 6.2E-04 | 0.8 | 1.8 |
| CTDP1        | 0.9 | 6.7E-05 | 0.7 | 6.3E-04 | 0.8 | 1.8 |
| SDC3         | 0.9 | 8.9E-05 | 0.8 | 3.2E-04 | 0.8 | 1.8 |
| GNG7         | 0.8 | 3.6E-04 | 0.8 | 2.2E-04 | 0.8 | 1.8 |
| PHPT1        | 0.8 | 2.6E-04 | 0.8 | 1.1E-04 | 0.8 | 1.8 |
| CYHR1        | 0.9 | 8.5E-05 | 0.8 | 3.6E-04 | 0.8 | 1.8 |
| CCDC76       | 0.9 | 5.1E-05 | 0.7 | 8.1E-04 | 0.8 | 1.8 |
| TP53I3       | 0.9 | 8.7E-05 | 0.8 | 3.8E-04 | 0.8 | 1.8 |
| DYNLL1       | 0.8 | 3.1E-04 | 0.8 | 1.0E-04 | 0.8 | 1.8 |
| WIPF1        | 0.7 | 8.5E-04 | 0.9 | 6.8E-05 | 0.8 | 1.8 |
| WDR59        | 0.8 | 4.1E-04 | 0.9 | 7.9E-05 | 0.8 | 1.8 |
| FAM50A       | 0.9 | 9.6E-05 | 0.8 | 3.4E-04 | 0.8 | 1.8 |
| PHF20L1      | 0.8 | 2.0E-04 | 0.8 | 1.9E-04 | 0.8 | 1.8 |
| MEX3C        | 0.7 | 6.5E-04 | 0.9 | 5.8E-05 | 0.8 | 1.8 |
| SLC16A11     | 0.8 | 4.5E-04 | 0.8 | 1.2E-04 | 0.8 | 1.8 |
| TMX1         | 0.8 | 1.3E-04 | 0.8 | 3.3E-04 | 0.8 | 1.7 |
| PYY2         | 0.8 | 6.1E-04 | 0.8 | 3.0E-04 | 0.8 | 1.7 |
| FBXL20       | 0.7 | 8.9E-04 | 0.9 | 9.4E-05 | 0.8 | 1.7 |
| C5orf45      | 0.9 | 7.2E-05 | 0.7 | 5.8E-04 | 0.8 | 1.7 |
| MRPS25       | 0.9 | 9.4E-05 | 0.8 | 4.5E-04 | 0.8 | 1.7 |
| NNT          | 0.9 | 7.9E-05 | 0.7 | 8.0E-04 | 0.8 | 1.7 |
| SR140        | 0.9 | 9.6E-05 | 0.8 | 4.7E-04 | 0.8 | 1.7 |
| SERBP1       | 0.8 | 3.6E-04 | 0.8 | 1.3E-04 | 0.8 | 1.7 |
| HHAT         | 0.9 | 8.4E-05 | 0.7 | 8.8E-04 | 0.8 | 1.7 |
| RCBTB2       | 0.8 | 1.7E-04 | 0.8 | 3.2E-04 | 0.8 | 1.7 |
| TMEM42       | 0.8 | 3.6E-04 | 0.8 | 1.4E-04 | 0.8 | 1.7 |
| RNF8         | 0.9 | 1.0E-04 | 0.7 | 6.7E-04 | 0.8 | 1.7 |
| PHKB         | 0.9 | 9.4E-05 | 0.7 | 5.3E-04 | 0.8 | 1.7 |
| GOLGA3       | 0.9 | 7.0E-05 | 0.7 | 7.0E-04 | 0.8 | 1.7 |
| BDP1         | 0.7 | 8.8E-04 | 0.9 | 6.1E-05 | 0.8 | 1.7 |
| RALGAPA1     | 0.9 | 9.0E-05 | 0.7 | 6.3E-04 | 0.8 | 1.7 |
| EXOC1        | 0.8 | 2.9E-04 | 0.8 | 2.3E-04 | 0.8 | 1.7 |
| AHSA2        | 0.9 | 5.5E-05 | 0.7 | 9.5E-04 | 0.8 | 1.7 |
| AES          | 0.8 | 1.2E-04 | 0.8 | 4.7E-04 | 0.8 | 1.7 |
| GKAP1        | 0.8 | 2.4E-04 | 0.8 | 2.5E-04 | 0.8 | 1.7 |
| ZSCAN16      | 0.8 | 2.5E-04 | 0.8 | 3.3E-04 | 0.8 | 1.7 |
| CREB3L1      | 0.7 | 7.8E-04 | 0.9 | 8.7E-05 | 0.8 | 1.7 |
| TMEM170A     | 0.8 | 3.0E-04 | 0.8 | 2.6E-04 | 0.8 | 1.7 |
| MTF2         | 0.7 | 6.0E-04 | 0.8 | 1.3E-04 | 0.8 | 1.7 |

|          |      |         |      |         |      |      |
|----------|------|---------|------|---------|------|------|
| KIRREL3  | 0.8  | 7.0E-04 | 0.8  | 5.5E-04 | 0.8  | 1.7  |
| ADK      | 0.8  | 1.1E-04 | 0.7  | 6.6E-04 | 0.8  | 1.7  |
| LPPR2    | 0.9  | 1.0E-04 | 0.7  | 9.6E-04 | 0.8  | 1.7  |
| PECR     | 0.8  | 5.5E-04 | 0.8  | 3.1E-04 | 0.8  | 1.7  |
| ZNF786   | 0.7  | 6.8E-04 | 0.8  | 1.3E-04 | 0.8  | 1.7  |
| HEMK1    | 0.8  | 4.5E-04 | 0.8  | 3.6E-04 | 0.8  | 1.7  |
| CCT2     | 0.8  | 3.2E-04 | 0.8  | 2.5E-04 | 0.8  | 1.7  |
| RNGTT    | 0.8  | 3.0E-04 | 0.8  | 5.6E-04 | 0.8  | 1.7  |
| MOSPD2   | 0.8  | 3.4E-04 | 0.7  | 9.9E-04 | 0.8  | 1.7  |
| ENGASE   | 0.8  | 5.0E-04 | 0.8  | 1.8E-04 | 0.8  | 1.7  |
| PIGF     | 0.8  | 1.2E-04 | 0.7  | 7.4E-04 | 0.8  | 1.7  |
| FAM89B   | 0.8  | 3.9E-04 | 0.8  | 2.3E-04 | 0.8  | 1.7  |
| PPWD1    | 0.8  | 2.1E-04 | 0.8  | 4.2E-04 | 0.8  | 1.7  |
| PLEKHA8  | 0.8  | 1.2E-04 | 0.7  | 8.5E-04 | 0.8  | 1.7  |
| PLEKHA9  | 0.8  | 1.2E-04 | 0.7  | 8.5E-04 | 0.8  | 1.7  |
| ATP6V1B2 | 0.7  | 6.3E-04 | 0.8  | 1.5E-04 | 0.8  | 1.7  |
| CBX1     | 0.8  | 5.0E-04 | 0.8  | 1.9E-04 | 0.8  | 1.7  |
| POLR3B   | 0.8  | 1.3E-04 | 0.7  | 7.2E-04 | 0.8  | 1.7  |
| APEX1    | 0.8  | 4.7E-04 | 0.8  | 2.1E-04 | 0.8  | 1.7  |
| ZNF506   | 0.8  | 3.9E-04 | 0.8  | 3.1E-04 | 0.8  | 1.7  |
| UIMC1    | 0.8  | 1.1E-04 | 0.7  | 9.5E-04 | 0.8  | 1.7  |
| KRI1     | 0.7  | 5.9E-04 | 0.8  | 1.9E-04 | 0.8  | 1.7  |
| GTF2I    | 0.7  | 7.0E-04 | 0.8  | 1.6E-04 | 0.8  | 1.7  |
| PWP1     | 0.8  | 3.0E-04 | 0.8  | 4.0E-04 | 0.8  | 1.7  |
| NCBP2    | 0.8  | 1.7E-04 | 0.7  | 7.3E-04 | 0.8  | 1.7  |
| IFI44L   | 0.7  | 9.1E-04 | 0.8  | 1.7E-04 | 0.8  | 1.7  |
| SLC7A6OS | 0.8  | 2.6E-04 | 0.7  | 5.0E-04 | 0.8  | 1.7  |
| PHKG1    | 0.7  | 7.3E-04 | 0.8  | 2.3E-04 | 0.8  | 1.7  |
| LRRC28   | 0.8  | 2.5E-04 | 0.7  | 6.0E-04 | 0.8  | 1.7  |
| ZNF304   | 0.7  | 1.0E-03 | 0.8  | 1.5E-04 | 0.8  | 1.7  |
| TMEM107  | 0.8  | 4.5E-04 | 0.8  | 4.9E-04 | 0.8  | 1.7  |
| NSUN6    | 0.8  | 3.2E-04 | 0.8  | 5.0E-04 | 0.8  | 1.7  |
| C5orf42  | 0.8  | 2.1E-04 | 0.7  | 7.9E-04 | 0.8  | 1.7  |
| ZNF443   | 0.8  | 5.3E-04 | 0.8  | 4.6E-04 | 0.8  | 1.7  |
| THOC1    | 0.7  | 9.1E-04 | 0.8  | 3.5E-04 | 0.8  | 1.7  |
| ARIH2    | 0.8  | 3.8E-04 | 0.8  | 4.6E-04 | 0.8  | 1.7  |
| NBR2     | 0.8  | 3.2E-04 | 0.7  | 8.8E-04 | 0.8  | 1.7  |
| CYP2J2   | 0.8  | 2.8E-04 | 0.7  | 8.9E-04 | 0.8  | 1.7  |
| METAP2   | 0.8  | 2.6E-04 | 0.7  | 8.5E-04 | 0.8  | 1.7  |
| BIRC6    | 0.8  | 3.1E-04 | 0.7  | 9.9E-04 | 0.7  | 1.7  |
| NUDT9    | 0.7  | 5.5E-04 | 0.7  | 5.5E-04 | 0.7  | 1.7  |
| CDR2L    | 0.8  | 4.4E-04 | 0.7  | 9.6E-04 | 0.7  | 1.7  |
| HAUS3    | 0.8  | 5.2E-04 | 0.7  | 8.4E-04 | 0.7  | 1.7  |
| PCGF3    | 0.8  | 4.8E-04 | 0.7  | 9.1E-04 | 0.7  | 1.7  |
| INTS9    | 0.7  | 5.4E-04 | 0.7  | 6.6E-04 | 0.7  | 1.7  |
| TBCC     | 0.8  | 4.3E-04 | 0.7  | 8.5E-04 | 0.7  | 1.7  |
| LARS2    | 0.7  | 6.2E-04 | 0.7  | 6.3E-04 | 0.7  | 1.7  |
| PCM1     | 0.7  | 6.2E-04 | 0.7  | 6.9E-04 | 0.7  | 1.7  |
| FLJ25222 | 0.7  | 5.1E-04 | 0.7  | 8.9E-04 | 0.7  | 1.7  |
| C7orf25  | 0.7  | 7.2E-04 | 0.7  | 6.9E-04 | 0.7  | 1.7  |
| B4GALT4  | 0.7  | 7.6E-04 | 0.7  | 7.7E-04 | 0.7  | 1.7  |
| KLHL9    | 0.7  | 7.9E-04 | 0.7  | 7.7E-04 | 0.7  | 1.6  |
| GIN52    | 0.7  | 8.4E-04 | 0.7  | 7.6E-04 | 0.7  | 1.6  |
| KANK1    | -0.7 | 9.3E-04 | -0.7 | 7.1E-04 | -0.7 | 0.61 |
| PPFIBP2  | -0.7 | 7.2E-04 | -0.7 | 8.7E-04 | -0.7 | 0.61 |
| LENG1    | -0.7 | 5.7E-04 | -0.7 | 8.3E-04 | -0.7 | 0.60 |
| COG6     | -0.7 | 7.7E-04 | -0.7 | 6.5E-04 | -0.7 | 0.60 |
| C10orf47 | -0.7 | 8.9E-04 | -0.7 | 5.1E-04 | -0.7 | 0.60 |
| EIF3F    | -0.8 | 4.4E-04 | -0.7 | 1.0E-03 | -0.7 | 0.60 |
| NSMCE4A  | -0.7 | 7.8E-04 | -0.7 | 5.4E-04 | -0.7 | 0.60 |
| MLF1IP   | -0.8 | 5.2E-04 | -0.7 | 8.8E-04 | -0.7 | 0.60 |
| ANKS1A   | -0.7 | 5.9E-04 | -0.7 | 5.6E-04 | -0.7 | 0.60 |

1.64743785

|          |      |         |      |         |      |      |
|----------|------|---------|------|---------|------|------|
| CCDC85B  | -0.8 | 4.2E-04 | -0.7 | 7.4E-04 | -0.7 | 0.60 |
| BHLHE41  | -0.8 | 4.0E-04 | -0.7 | 8.3E-04 | -0.7 | 0.60 |
| CEBPG    | -0.7 | 9.0E-04 | -0.8 | 3.3E-04 | -0.7 | 0.60 |
| NDUFB3   | -0.7 | 8.4E-04 | -0.8 | 3.4E-04 | -0.7 | 0.60 |
| EPAS1    | -0.8 | 4.7E-04 | -0.7 | 5.3E-04 | -0.7 | 0.59 |
| HELLS    | -0.8 | 9.1E-04 | -0.7 | 9.3E-04 | -0.8 | 0.59 |
| CEP68    | -0.7 | 5.3E-04 | -0.8 | 4.0E-04 | -0.8 | 0.59 |
| MFN2     | -0.8 | 2.9E-04 | -0.7 | 7.0E-04 | -0.8 | 0.59 |
| NBR1     | -0.8 | 4.3E-04 | -0.8 | 4.6E-04 | -0.8 | 0.59 |
| MRPL4    | -0.8 | 4.6E-04 | -0.7 | 5.8E-04 | -0.8 | 0.59 |
| DNAJC3   | -0.7 | 9.2E-04 | -0.8 | 2.2E-04 | -0.8 | 0.59 |
| FEM1B    | -0.8 | 8.9E-04 | -0.7 | 9.7E-04 | -0.8 | 0.59 |
| CYTIP    | -0.8 | 5.9E-04 | -0.8 | 5.3E-04 | -0.8 | 0.59 |
| CLDN5    | -0.7 | 6.8E-04 | -0.8 | 2.3E-04 | -0.8 | 0.59 |
| TRAF3IP1 | -0.7 | 9.7E-04 | -0.8 | 3.8E-04 | -0.8 | 0.59 |
| RYK      | -0.7 | 9.7E-04 | -0.8 | 1.7E-04 | -0.8 | 0.59 |
| MRPL14   | -0.8 | 2.1E-04 | -0.7 | 6.9E-04 | -0.8 | 0.59 |
| DHCR24   | -0.8 | 4.6E-04 | -0.8 | 3.3E-04 | -0.8 | 0.59 |
| C19orf56 | -0.7 | 5.2E-04 | -0.8 | 2.8E-04 | -0.8 | 0.59 |
| SIGMAR1  | -0.8 | 2.9E-04 | -0.8 | 4.4E-04 | -0.8 | 0.59 |
| WVVOX    | -0.8 | 1.4E-04 | -0.7 | 8.7E-04 | -0.8 | 0.59 |
| FXN      | -0.8 | 2.6E-04 | -0.7 | 5.2E-04 | -0.8 | 0.59 |
| ATP6V1G1 | -0.8 | 4.6E-04 | -0.8 | 2.6E-04 | -0.8 | 0.59 |
| FBXL3    | -0.8 | 2.2E-04 | -0.7 | 5.4E-04 | -0.8 | 0.58 |
| BUB3     | -0.8 | 1.4E-04 | -0.7 | 8.0E-04 | -0.8 | 0.58 |
| MAFF     | -0.8 | 2.5E-04 | -0.7 | 6.1E-04 | -0.8 | 0.58 |
| NOP58    | -0.8 | 1.1E-04 | -0.7 | 9.8E-04 | -0.8 | 0.58 |
| RPL21    | -0.8 | 3.0E-04 | -0.8 | 3.7E-04 | -0.8 | 0.58 |
| PSMG1    | -0.7 | 8.0E-04 | -0.8 | 1.3E-04 | -0.8 | 0.58 |
| PPP1R12C | -0.8 | 5.0E-04 | -0.8 | 3.3E-04 | -0.8 | 0.58 |
| ZSWIM7   | -0.8 | 1.7E-04 | -0.7 | 6.5E-04 | -0.8 | 0.58 |
| NUDT16   | -0.8 | 2.2E-04 | -0.7 | 6.7E-04 | -0.8 | 0.58 |
| DDAH1    | -0.7 | 7.1E-04 | -0.8 | 1.6E-04 | -0.8 | 0.58 |
| NT5C     | -0.7 | 5.0E-04 | -0.8 | 2.1E-04 | -0.8 | 0.58 |
| C1orf38  | -0.8 | 4.1E-04 | -0.8 | 2.5E-04 | -0.8 | 0.58 |
| HLA-DPA1 | -0.7 | 6.3E-04 | -0.8 | 1.5E-04 | -0.8 | 0.58 |
| BTBD11   | -0.8 | 2.2E-04 | -0.7 | 7.8E-04 | -0.8 | 0.58 |
| C7orf50  | -0.7 | 6.9E-04 | -0.8 | 1.5E-04 | -0.8 | 0.58 |
| TMEM2    | -0.8 | 1.4E-04 | -0.7 | 6.2E-04 | -0.8 | 0.58 |
| TATDN1   | -0.8 | 1.3E-04 | -0.7 | 8.4E-04 | -0.8 | 0.58 |
| EHBP1L1  | -0.7 | 6.7E-04 | -0.8 | 1.6E-04 | -0.8 | 0.58 |
| CCNB1IP1 | -0.8 | 2.0E-04 | -0.8 | 4.2E-04 | -0.8 | 0.58 |
| PAK1     | -0.8 | 5.2E-04 | -0.8 | 5.1E-04 | -0.8 | 0.58 |
| SCPEP1   | -0.7 | 7.0E-04 | -0.8 | 1.1E-04 | -0.8 | 0.58 |
| MRPS26   | -0.8 | 1.2E-04 | -0.7 | 6.2E-04 | -0.8 | 0.58 |
| HADH     | -0.7 | 7.3E-04 | -0.9 | 9.5E-05 | -0.8 | 0.58 |
| RERE     | -0.8 | 8.7E-04 | -0.8 | 9.0E-04 | -0.8 | 0.58 |
| PLEKHA1  | -0.8 | 1.6E-04 | -0.8 | 4.3E-04 | -0.8 | 0.58 |
| GRHL3    | -0.8 | 7.4E-04 | -0.8 | 4.3E-04 | -0.8 | 0.58 |
| MMP7     | -0.7 | 6.0E-04 | -0.8 | 1.1E-04 | -0.8 | 0.58 |
| FBXO5    | -0.7 | 8.3E-04 | -0.9 | 9.6E-05 | -0.8 | 0.58 |
| ASNA1    | -0.8 | 6.3E-04 | -0.8 | 1.5E-04 | -0.8 | 0.58 |
| KIAA0494 | -0.9 | 1.0E-04 | -0.7 | 6.2E-04 | -0.8 | 0.58 |
| LRPAP1   | -0.9 | 8.2E-05 | -0.7 | 7.0E-04 | -0.8 | 0.58 |
| ADH5     | -0.8 | 4.9E-04 | -0.8 | 1.2E-04 | -0.8 | 0.58 |
| RAI14    | -0.9 | 6.7E-05 | -0.7 | 8.1E-04 | -0.8 | 0.58 |
| CD48     | -0.8 | 8.9E-04 | -0.8 | 1.7E-04 | -0.8 | 0.58 |
| HAUS4    | -0.8 | 2.0E-04 | -0.8 | 2.8E-04 | -0.8 | 0.58 |
| FADD     | -0.7 | 8.4E-04 | -0.9 | 6.0E-05 | -0.8 | 0.58 |
| EIF2AK2  | -0.7 | 6.3E-04 | -0.9 | 8.6E-05 | -0.8 | 0.58 |
| SF3A1    | -0.8 | 2.1E-04 | -0.8 | 2.6E-04 | -0.8 | 0.57 |
| NDUFS1   | -0.8 | 1.4E-04 | -0.8 | 3.8E-04 | -0.8 | 0.57 |

|           |      |         |      |         |      |      |
|-----------|------|---------|------|---------|------|------|
| ZWILCH    | -0.8 | 5.1E-04 | -0.8 | 1.4E-04 | -0.8 | 0.57 |
| PHF11     | -0.8 | 2.6E-04 | -0.8 | 2.1E-04 | -0.8 | 0.57 |
| GK5       | -0.8 | 2.0E-04 | -0.8 | 2.9E-04 | -0.8 | 0.57 |
| GRHPR     | -0.9 | 6.8E-05 | -0.7 | 7.2E-04 | -0.8 | 0.57 |
| ABAT      | -0.8 | 2.4E-04 | -0.8 | 2.2E-04 | -0.8 | 0.57 |
| FABP5     | -0.9 | 6.3E-05 | -0.7 | 7.1E-04 | -0.8 | 0.57 |
| GSTK1     | -0.7 | 6.1E-04 | -0.9 | 7.4E-05 | -0.8 | 0.57 |
| NSMCE2    | -0.8 | 3.3E-04 | -0.8 | 1.3E-04 | -0.8 | 0.57 |
| RFC2      | -0.7 | 9.2E-04 | -0.9 | 8.9E-05 | -0.8 | 0.57 |
| SNX17     | -0.8 | 1.4E-04 | -0.8 | 3.9E-04 | -0.8 | 0.57 |
| LY6E      | -0.9 | 8.3E-05 | -0.8 | 4.4E-04 | -0.8 | 0.57 |
| ZNF395    | -0.8 | 6.5E-04 | -0.8 | 3.0E-04 | -0.8 | 0.57 |
| DCBLD1    | -0.8 | 1.7E-04 | -0.8 | 4.6E-04 | -0.8 | 0.57 |
| FOXO3B    | -0.8 | 2.0E-04 | -0.8 | 2.1E-04 | -0.8 | 0.57 |
| HM13      | -0.7 | 9.8E-04 | -0.9 | 3.3E-05 | -0.8 | 0.57 |
| C9orf95   | -0.8 | 1.1E-04 | -0.8 | 3.2E-04 | -0.8 | 0.57 |
| SBDS      | -0.9 | 9.2E-05 | -0.8 | 3.9E-04 | -0.8 | 0.57 |
| AKR1A1    | -0.7 | 6.1E-04 | -0.9 | 5.3E-05 | -0.8 | 0.57 |
| C20orf43  | -0.8 | 4.6E-04 | -0.9 | 7.5E-05 | -0.8 | 0.57 |
| CREB3L4   | -0.7 | 7.1E-04 | -0.9 | 4.6E-05 | -0.8 | 0.57 |
| RILP      | -0.8 | 4.8E-04 | -0.9 | 7.4E-05 | -0.8 | 0.57 |
| MGST2     | -0.8 | 2.1E-04 | -0.8 | 1.6E-04 | -0.8 | 0.57 |
| FN3KRP    | -0.9 | 3.2E-05 | -0.7 | 9.4E-04 | -0.8 | 0.57 |
| TEAD4     | -0.9 | 6.4E-05 | -0.7 | 9.5E-04 | -0.8 | 0.57 |
| GOLGB1    | -0.8 | 9.2E-04 | -0.8 | 9.2E-04 | -0.8 | 0.57 |
| ARHGAP4   | -0.8 | 1.4E-04 | -0.8 | 2.3E-04 | -0.8 | 0.57 |
| BTF3P11   | -0.8 | 1.1E-04 | -0.8 | 2.6E-04 | -0.8 | 0.57 |
| NUDC      | -0.8 | 3.0E-04 | -0.8 | 1.0E-04 | -0.8 | 0.57 |
| TSSC4     | -0.8 | 3.6E-04 | -0.9 | 8.5E-05 | -0.8 | 0.57 |
| CYCS      | -0.8 | 1.4E-04 | -0.8 | 2.1E-04 | -0.8 | 0.57 |
| ZDHHC16   | -0.7 | 5.8E-04 | -0.9 | 5.7E-05 | -0.8 | 0.57 |
| ABCA6     | -0.9 | 8.4E-05 | -0.8 | 3.7E-04 | -0.8 | 0.57 |
| PLAGL2    | -0.9 | 9.2E-05 | -0.8 | 3.2E-04 | -0.8 | 0.57 |
| ELF1      | -0.7 | 5.7E-04 | -0.9 | 5.8E-05 | -0.8 | 0.57 |
| AAMP      | -0.8 | 1.8E-04 | -0.8 | 1.6E-04 | -0.8 | 0.57 |
| LNX2      | -0.9 | 3.7E-05 | -0.7 | 8.0E-04 | -0.8 | 0.57 |
| CDK5RAP1  | -0.8 | 2.5E-04 | -0.8 | 4.1E-04 | -0.8 | 0.57 |
| RAB2A     | -0.9 | 1.8E-04 | -0.8 | 4.1E-04 | -0.8 | 0.57 |
| RPF2      | -0.8 | 3.1E-04 | -0.9 | 8.1E-05 | -0.8 | 0.57 |
| SMN2      | -0.9 | 1.2E-04 | -0.8 | 5.1E-04 | -0.8 | 0.57 |
| C8orf55   | -0.8 | 2.5E-04 | -0.8 | 3.0E-04 | -0.8 | 0.57 |
| IDH2      | -0.9 | 2.3E-05 | -0.7 | 9.4E-04 | -0.8 | 0.57 |
| LRP3      | -0.8 | 2.8E-04 | -0.9 | 8.3E-05 | -0.8 | 0.57 |
| DTD1      | -0.8 | 1.6E-04 | -0.8 | 1.4E-04 | -0.8 | 0.56 |
| PIR       | -0.7 | 9.6E-04 | -0.9 | 2.1E-05 | -0.8 | 0.56 |
| GPATCH3   | -0.8 | 1.6E-04 | -0.8 | 1.9E-04 | -0.8 | 0.56 |
| IFIT1     | -0.8 | 3.3E-04 | -0.9 | 6.3E-05 | -0.8 | 0.56 |
| CCDC75    | -0.8 | 3.8E-04 | -0.8 | 2.0E-04 | -0.8 | 0.56 |
| KLHDC9    | -0.7 | 7.9E-04 | -0.9 | 2.6E-05 | -0.8 | 0.56 |
| MLXIPL    | -0.9 | 1.5E-04 | -0.8 | 7.9E-04 | -0.8 | 0.56 |
| TIMM44    | -0.8 | 5.4E-04 | -0.9 | 1.1E-04 | -0.8 | 0.56 |
| ANXA6     | -0.7 | 9.3E-04 | -0.9 | 2.2E-05 | -0.8 | 0.56 |
| C20orf108 | -0.9 | 2.8E-05 | -0.7 | 6.2E-04 | -0.8 | 0.56 |
| ARID3A    | -0.8 | 4.2E-04 | -0.9 | 1.0E-04 | -0.8 | 0.56 |
| LEPROT    | -0.8 | 1.5E-04 | -0.8 | 1.2E-04 | -0.8 | 0.56 |
| PTRH1     | -0.9 | 9.2E-05 | -0.8 | 2.0E-04 | -0.8 | 0.56 |
| PIBF1     | -0.8 | 3.3E-04 | -0.9 | 6.1E-05 | -0.8 | 0.56 |
| DGUOK     | -0.9 | 5.2E-05 | -0.8 | 3.3E-04 | -0.8 | 0.56 |
| LSM14A    | -0.9 | 4.2E-05 | -0.8 | 3.9E-04 | -0.8 | 0.56 |
| PAPLN     | -0.8 | 3.1E-04 | -0.9 | 5.9E-05 | -0.8 | 0.56 |
| ANXA7     | -0.8 | 3.2E-04 | -0.9 | 4.9E-05 | -0.8 | 0.56 |
| ARHGAP32  | -0.8 | 2.0E-04 | -0.9 | 8.9E-05 | -0.8 | 0.56 |

|          |      |         |      |         |      |      |
|----------|------|---------|------|---------|------|------|
| GLRX     | -0.9 | 2.1E-05 | -0.7 | 6.9E-04 | -0.8 | 0.56 |
| CREB3    | -0.8 | 3.0E-04 | -0.9 | 5.2E-05 | -0.8 | 0.56 |
| MYO6     | -0.7 | 9.6E-04 | -1.0 | 1.5E-05 | -0.8 | 0.56 |
| ZGPAT    | -0.8 | 1.9E-04 | -0.9 | 7.7E-05 | -0.8 | 0.56 |
| TMEM98   | -0.8 | 2.7E-04 | -0.9 | 5.4E-05 | -0.8 | 0.56 |
| RARRES2  | -0.7 | 6.3E-04 | -0.9 | 2.1E-05 | -0.8 | 0.56 |
| ALDH18A1 | -0.9 | 2.9E-05 | -0.8 | 4.7E-04 | -0.8 | 0.56 |
| TFDP3    | -0.7 | 7.1E-04 | -0.9 | 2.7E-05 | -0.8 | 0.56 |
| DPM3     | -0.9 | 2.9E-05 | -0.8 | 4.7E-04 | -0.8 | 0.56 |
| MAPKAPK3 | -0.9 | 3.5E-05 | -0.7 | 5.9E-04 | -0.8 | 0.56 |
| MRPS35   | -1.0 | 1.6E-05 | -0.7 | 7.9E-04 | -0.8 | 0.56 |
| CDKN2AIP | -0.9 | 1.1E-04 | -0.8 | 1.8E-04 | -0.8 | 0.56 |
| FBXL7    | -0.8 | 5.0E-04 | -0.9 | 2.5E-05 | -0.8 | 0.56 |
| OXTR     | -0.8 | 2.2E-04 | -0.9 | 8.9E-05 | -0.8 | 0.56 |
| UBE2J1   | -0.8 | 1.2E-04 | -0.8 | 1.1E-04 | -0.8 | 0.56 |
| TOR3A    | -0.8 | 3.5E-04 | -0.9 | 3.4E-05 | -0.8 | 0.56 |
| TGFBRAP1 | -0.9 | 5.1E-05 | -0.8 | 3.0E-04 | -0.8 | 0.56 |
| HAUS7    | -0.7 | 8.4E-04 | -1.0 | 1.6E-05 | -0.8 | 0.56 |
| SLC1A5   | -0.9 | 4.4E-05 | -0.8 | 5.1E-04 | -0.8 | 0.56 |
| C5orf41  | -0.8 | 1.9E-04 | -0.9 | 1.2E-04 | -0.8 | 0.56 |
| DNAJC2   | -0.8 | 1.9E-04 | -0.9 | 6.2E-05 | -0.8 | 0.56 |
| SCLT1    | -0.8 | 4.5E-04 | -0.9 | 6.4E-05 | -0.8 | 0.56 |
| KREMEN1  | -0.8 | 2.2E-04 | -0.9 | 5.2E-05 | -0.8 | 0.56 |
| CD2BP2   | -0.7 | 9.8E-04 | -1.0 | 1.2E-05 | -0.8 | 0.56 |
| RPL15    | -0.7 | 8.0E-04 | -1.0 | 1.2E-05 | -0.8 | 0.56 |
| CKS2     | -1.0 | 1.8E-05 | -0.7 | 5.4E-04 | -0.8 | 0.56 |
| HLA-DQB2 | -0.9 | 5.3E-05 | -0.8 | 4.9E-04 | -0.8 | 0.56 |
| C17orf75 | -0.8 | 1.9E-04 | -0.9 | 6.9E-05 | -0.8 | 0.56 |
| STEAP2   | -1.0 | 2.5E-05 | -0.7 | 5.9E-04 | -0.8 | 0.56 |
| THRA     | -1.0 | 1.2E-05 | -0.7 | 7.2E-04 | -0.8 | 0.55 |
| FAM84A   | -0.8 | 2.1E-04 | -0.9 | 5.8E-05 | -0.9 | 0.55 |
| BRF2     | -0.9 | 6.0E-05 | -0.8 | 1.6E-04 | -0.9 | 0.55 |
| CXorf40A | -0.8 | 4.0E-04 | -0.9 | 2.2E-05 | -0.9 | 0.55 |
| PDZD2    | -0.8 | 1.8E-04 | -0.9 | 5.8E-05 | -0.9 | 0.55 |
| SCAMP2   | -0.9 | 1.9E-05 | -0.8 | 4.5E-04 | -0.9 | 0.55 |
| ATP5C1   | -0.8 | 1.5E-04 | -0.9 | 5.9E-05 | -0.9 | 0.55 |
| CAPNS2   | -0.9 | 5.8E-05 | -0.8 | 4.8E-04 | -0.9 | 0.55 |
| FOXRED1  | -0.7 | 6.8E-04 | -1.0 | 2.1E-05 | -0.9 | 0.55 |
| RSPH1    | -0.9 | 2.2E-05 | -0.8 | 4.0E-04 | -0.9 | 0.55 |
| SLC15A3  | -0.8 | 1.5E-04 | -0.9 | 6.6E-05 | -0.9 | 0.55 |
| MICAL2   | -0.9 | 3.1E-05 | -0.8 | 2.7E-04 | -0.9 | 0.55 |
| MBNL1    | -0.7 | 6.3E-04 | -1.0 | 1.2E-05 | -0.9 | 0.55 |
| DYNLT3   | -0.8 | 3.0E-04 | -0.9 | 2.7E-05 | -0.9 | 0.55 |
| PSMC4    | -0.9 | 2.2E-05 | -0.8 | 3.5E-04 | -0.9 | 0.55 |
| MYH9     | -0.8 | 7.1E-04 | -1.0 | 2.7E-05 | -0.9 | 0.55 |
| ZNF107   | -0.9 | 9.9E-05 | -0.8 | 2.7E-04 | -0.9 | 0.55 |
| ERG      | -0.8 | 1.3E-04 | -0.9 | 8.4E-05 | -0.9 | 0.55 |
| SEC63    | -0.8 | 3.7E-04 | -0.9 | 2.0E-05 | -0.9 | 0.55 |
| MTA3     | -0.8 | 2.2E-04 | -0.9 | 3.6E-05 | -0.9 | 0.55 |
| NPM2     | -0.9 | 4.9E-04 | -0.8 | 4.3E-04 | -0.9 | 0.55 |
| DACT3    | -0.8 | 1.1E-04 | -0.9 | 7.1E-05 | -0.9 | 0.55 |
| GPN2     | -0.9 | 5.5E-05 | -0.8 | 1.4E-04 | -0.9 | 0.55 |
| METRNL   | -0.8 | 4.1E-04 | -1.0 | 1.6E-05 | -0.9 | 0.55 |
| CXCL14   | -0.8 | 1.1E-04 | -0.9 | 6.6E-05 | -0.9 | 0.55 |
| C1orf93  | -1.0 | 2.2E-05 | -0.7 | 7.5E-04 | -0.9 | 0.55 |
| ESRP2    | -0.8 | 1.6E-04 | -0.9 | 4.5E-05 | -0.9 | 0.55 |
| COL6A2   | -0.9 | 3.3E-05 | -0.8 | 2.0E-04 | -0.9 | 0.55 |
| TRA2B    | -0.9 | 2.1E-05 | -0.8 | 3.1E-04 | -0.9 | 0.55 |
| PYROXD2  | -0.8 | 5.8E-04 | -0.9 | 1.7E-04 | -0.9 | 0.55 |
| ANAPC2   | -0.9 | 7.1E-05 | -0.8 | 4.6E-04 | -0.9 | 0.55 |
| MX1      | -1.0 | 1.2E-05 | -0.7 | 4.9E-04 | -0.9 | 0.55 |
| MICALL2  | -1.0 | 8.2E-05 | -0.8 | 8.7E-04 | -0.9 | 0.55 |

|          |      |         |      |         |      |      |
|----------|------|---------|------|---------|------|------|
| IFIT3    | -1.0 | 1.9E-05 | -0.8 | 4.6E-04 | -0.9 | 0.55 |
| INSR     | -0.9 | 2.1E-04 | -0.8 | 3.3E-04 | -0.9 | 0.55 |
| RHBDD2   | -0.9 | 5.1E-05 | -0.8 | 1.9E-04 | -0.9 | 0.55 |
| HERC3    | -0.9 | 5.6E-04 | -0.9 | 1.9E-04 | -0.9 | 0.55 |
| OSTF1    | -0.8 | 1.5E-04 | -0.9 | 3.8E-05 | -0.9 | 0.55 |
| IKZF5    | -1.0 | 3.8E-05 | -0.8 | 4.2E-04 | -0.9 | 0.55 |
| AHR      | -0.8 | 1.6E-04 | -0.9 | 3.5E-05 | -0.9 | 0.55 |
| SPCS1    | -0.9 | 3.0E-05 | -0.8 | 1.8E-04 | -0.9 | 0.55 |
| MRPL10   | -1.0 | 1.2E-05 | -0.8 | 4.1E-04 | -0.9 | 0.55 |
| RAD1     | -0.9 | 1.8E-04 | -0.8 | 2.1E-04 | -0.9 | 0.55 |
| KIAA2013 | -0.9 | 2.1E-05 | -0.8 | 2.6E-04 | -0.9 | 0.55 |
| EDARADD  | -0.8 | 1.7E-04 | -0.9 | 3.1E-05 | -0.9 | 0.55 |
| ADAT2    | -0.7 | 9.4E-04 | -1.0 | 6.6E-06 | -0.9 | 0.55 |
| SDC2     | -1.0 | 1.6E-05 | -0.8 | 3.2E-04 | -0.9 | 0.55 |
| MPP6     | -0.8 | 3.7E-04 | -0.9 | 2.4E-05 | -0.9 | 0.55 |
| COMT     | -1.0 | 5.6E-06 | -0.7 | 7.5E-04 | -0.9 | 0.55 |
| IFI16    | -0.8 | 4.3E-04 | -1.0 | 1.0E-05 | -0.9 | 0.55 |
| MLKL     | -0.8 | 1.2E-04 | -0.9 | 5.0E-05 | -0.9 | 0.55 |
| SLC3A2   | -1.0 | 1.3E-05 | -0.8 | 4.6E-04 | -0.9 | 0.55 |
| MYO15B   | -0.9 | 6.9E-05 | -0.9 | 8.8E-05 | -0.9 | 0.55 |
| DUS1L    | -1.0 | 1.1E-05 | -0.8 | 5.2E-04 | -0.9 | 0.55 |
| ZBTB43   | -1.0 | 1.5E-04 | -0.8 | 8.0E-04 | -0.9 | 0.55 |
| MRPL54   | -0.9 | 7.8E-05 | -0.9 | 6.0E-05 | -0.9 | 0.55 |
| PRR22    | -0.9 | 1.8E-04 | -0.9 | 1.4E-04 | -0.9 | 0.55 |
| FZD7     | -0.9 | 3.6E-05 | -0.8 | 1.2E-04 | -0.9 | 0.55 |
| VKORC1L1 | -0.8 | 1.4E-04 | -0.9 | 3.4E-05 | -0.9 | 0.55 |
| GHITM    | -0.9 | 4.0E-05 | -0.8 | 1.0E-04 | -0.9 | 0.54 |
| TRMT11   | -0.7 | 8.0E-04 | -1.0 | 5.9E-06 | -0.9 | 0.54 |
| DLGAP5   | -0.9 | 5.2E-05 | -0.9 | 8.2E-05 | -0.9 | 0.54 |
| VAMP3    | -0.9 | 3.1E-05 | -0.8 | 1.8E-04 | -0.9 | 0.54 |
| PLEK     | -0.9 | 5.8E-04 | -0.9 | 3.0E-04 | -0.9 | 0.54 |
| PSMC3    | -0.8 | 1.8E-04 | -0.9 | 2.0E-05 | -0.9 | 0.54 |
| ABTB2    | -0.9 | 3.0E-05 | -0.8 | 2.1E-04 | -0.9 | 0.54 |
| NAA20    | -0.9 | 6.8E-05 | -0.9 | 5.3E-05 | -0.9 | 0.54 |
| GSTA4    | -0.9 | 3.4E-05 | -0.8 | 1.1E-04 | -0.9 | 0.54 |
| NOLC1    | -0.8 | 1.5E-04 | -0.9 | 2.3E-05 | -0.9 | 0.54 |
| ATP6V0E1 | -0.9 | 2.9E-05 | -0.8 | 1.2E-04 | -0.9 | 0.54 |
| CHD4     | -0.9 | 6.5E-05 | -0.9 | 5.4E-05 | -0.9 | 0.54 |
| SNAI1    | -0.8 | 5.1E-04 | -1.0 | 7.1E-06 | -0.9 | 0.54 |
| LMO2     | -0.8 | 4.1E-04 | -1.0 | 7.9E-06 | -0.9 | 0.54 |
| PAWR     | -1.0 | 1.4E-05 | -0.8 | 2.3E-04 | -0.9 | 0.54 |
| RGMB     | -0.9 | 3.7E-05 | -0.8 | 1.9E-04 | -0.9 | 0.54 |
| EBP      | -0.8 | 1.6E-04 | -0.9 | 1.9E-05 | -0.9 | 0.54 |
| DGCR6    | -1.0 | 4.7E-06 | -0.7 | 5.8E-04 | -0.9 | 0.54 |
| STAT3    | -1.0 | 2.7E-05 | -0.8 | 2.7E-04 | -0.9 | 0.54 |
| COL14A1  | -0.8 | 1.2E-04 | -0.9 | 3.2E-05 | -0.9 | 0.54 |
| CHAF1B   | -0.8 | 1.2E-04 | -0.9 | 2.7E-05 | -0.9 | 0.54 |
| AHNAK    | -0.8 | 4.5E-04 | -1.0 | 7.0E-06 | -0.9 | 0.54 |
| CTSA     | -0.8 | 1.6E-04 | -1.0 | 1.8E-05 | -0.9 | 0.54 |
| TWISTNB  | -0.9 | 5.3E-05 | -0.9 | 6.7E-05 | -0.9 | 0.54 |
| CEBPB    | -0.8 | 2.1E-04 | -1.0 | 1.2E-05 | -0.9 | 0.54 |
| CALCOCO2 | -0.8 | 2.8E-04 | -1.0 | 8.7E-06 | -0.9 | 0.54 |
| MCL1     | -0.7 | 6.4E-04 | -1.0 | 3.5E-06 | -0.9 | 0.54 |
| MTPN     | -1.0 | 7.3E-06 | -0.8 | 3.3E-04 | -0.9 | 0.54 |
| PROSC    | -0.9 | 2.0E-04 | -0.9 | 2.7E-04 | -0.9 | 0.54 |
| TOE1     | -0.8 | 1.2E-04 | -0.9 | 2.2E-05 | -0.9 | 0.54 |
| NDUFA9   | -0.9 | 5.6E-05 | -0.9 | 4.4E-05 | -0.9 | 0.54 |
| DRAM1    | -0.8 | 1.2E-04 | -0.9 | 2.0E-05 | -0.9 | 0.54 |
| FAM3D    | -0.9 | 1.4E-04 | -0.9 | 3.7E-05 | -0.9 | 0.54 |
| LTBP4    | -1.0 | 1.7E-05 | -0.8 | 1.3E-04 | -0.9 | 0.54 |
| ASB6     | -0.8 | 6.3E-04 | -1.0 | 6.4E-06 | -0.9 | 0.54 |
| HPCA     | -0.9 | 2.6E-04 | -0.8 | 7.4E-04 | -0.9 | 0.54 |

|          |      |         |      |         |      |      |
|----------|------|---------|------|---------|------|------|
| RER1     | -1.0 | 8.5E-06 | -0.8 | 2.4E-04 | -0.9 | 0.54 |
| SPCS2    | -1.0 | 1.5E-05 | -0.8 | 1.3E-04 | -0.9 | 0.54 |
| IGFBP4   | -1.1 | 2.9E-06 | -0.7 | 5.8E-04 | -0.9 | 0.54 |
| CD74     | -0.8 | 2.7E-04 | -1.0 | 2.1E-05 | -0.9 | 0.54 |
| VPS25    | -1.0 | 1.8E-05 | -0.8 | 1.1E-04 | -0.9 | 0.54 |
| MST4     | -0.8 | 2.1E-04 | -1.0 | 9.9E-06 | -0.9 | 0.54 |
| DDX24    | -1.0 | 6.7E-05 | -0.8 | 4.9E-04 | -0.9 | 0.54 |
| ITGA3    | -0.9 | 2.8E-05 | -0.9 | 6.9E-05 | -0.9 | 0.54 |
| NUP35    | -1.0 | 1.2E-05 | -0.8 | 2.6E-04 | -0.9 | 0.54 |
| QKI      | -0.9 | 3.0E-04 | -0.9 | 3.4E-04 | -0.9 | 0.54 |
| SP2      | -1.0 | 1.0E-05 | -0.8 | 4.2E-04 | -0.9 | 0.54 |
| IMP4     | -1.0 | 1.3E-05 | -0.8 | 1.4E-04 | -0.9 | 0.54 |
| PEG10    | -0.9 | 4.9E-05 | -0.9 | 3.6E-05 | -0.9 | 0.54 |
| PPIL6    | -0.8 | 9.7E-04 | -1.0 | 4.4E-05 | -0.9 | 0.54 |
| CTNNB1   | -0.8 | 2.0E-04 | -1.0 | 9.2E-06 | -0.9 | 0.54 |
| DEPDC6   | -0.8 | 2.1E-04 | -1.0 | 7.6E-06 | -0.9 | 0.53 |
| FBXO18   | -0.7 | 8.4E-04 | -1.1 | 1.9E-06 | -0.9 | 0.53 |
| SLC35B1  | -0.8 | 1.9E-04 | -1.0 | 8.1E-06 | -0.9 | 0.53 |
| NSUN5    | -1.0 | 1.1E-05 | -0.8 | 1.3E-04 | -0.9 | 0.53 |
| RNF115   | -1.1 | 2.6E-06 | -0.7 | 6.6E-04 | -0.9 | 0.53 |
| SH2D2A   | -1.1 | 3.5E-06 | -0.7 | 6.4E-04 | -0.9 | 0.53 |
| PPTC7    | -0.9 | 1.1E-04 | -1.0 | 1.6E-05 | -0.9 | 0.53 |
| TNIP1    | -1.0 | 6.1E-06 | -0.8 | 2.1E-04 | -0.9 | 0.53 |
| TSKU     | -1.0 | 1.1E-05 | -0.8 | 1.2E-04 | -0.9 | 0.53 |
| WDR45L   | -0.8 | 4.1E-04 | -1.1 | 2.7E-06 | -0.9 | 0.53 |
| PCYT2    | -1.0 | 1.1E-05 | -0.8 | 1.1E-04 | -0.9 | 0.53 |
| ENC1     | -1.0 | 6.0E-06 | -0.8 | 2.3E-04 | -0.9 | 0.53 |
| SKAP2    | -0.8 | 1.7E-04 | -1.0 | 8.0E-06 | -0.9 | 0.53 |
| ARFGAP2  | -0.9 | 3.0E-04 | -0.9 | 1.5E-04 | -0.9 | 0.53 |
| CLCA4    | -1.0 | 1.1E-05 | -0.8 | 1.9E-04 | -0.9 | 0.53 |
| SH3BGRL2 | -0.9 | 7.6E-05 | -1.0 | 2.0E-05 | -0.9 | 0.53 |
| CDKN2A   | -1.0 | 1.3E-05 | -0.9 | 8.6E-05 | -0.9 | 0.53 |
| C6orf211 | -0.9 | 3.9E-05 | -0.9 | 2.8E-05 | -0.9 | 0.53 |
| ABCB1    | -1.0 | 3.7E-05 | -0.9 | 8.1E-05 | -0.9 | 0.53 |
| IARS     | -0.9 | 3.3E-05 | -0.9 | 3.0E-05 | -0.9 | 0.53 |
| LPAR6    | -1.0 | 1.8E-05 | -0.9 | 8.4E-05 | -0.9 | 0.53 |
| CFD      | -0.9 | 6.2E-05 | -1.0 | 1.6E-05 | -0.9 | 0.53 |
| TMEM106A | -1.0 | 4.7E-05 | -0.8 | 6.0E-04 | -0.9 | 0.53 |
| PLK1S1   | -0.9 | 2.3E-05 | -0.9 | 4.2E-05 | -0.9 | 0.53 |
| ASB2     | -0.9 | 4.7E-05 | -0.9 | 3.6E-05 | -0.9 | 0.53 |
| RAMP2    | -0.9 | 3.7E-05 | -0.9 | 2.7E-05 | -0.9 | 0.53 |
| RABEP2   | -0.9 | 7.6E-04 | -1.0 | 6.3E-05 | -0.9 | 0.53 |
| MGMT     | -1.0 | 8.8E-06 | -0.8 | 1.2E-04 | -0.9 | 0.53 |
| PYCARD   | -0.9 | 8.5E-05 | -1.0 | 1.1E-05 | -0.9 | 0.53 |
| PTP4A1   | -0.9 | 2.6E-05 | -0.9 | 3.5E-05 | -0.9 | 0.53 |
| RPS3     | -0.9 | 2.1E-05 | -0.9 | 4.1E-05 | -0.9 | 0.53 |
| SMAD5    | -1.0 | 1.4E-04 | -0.9 | 3.4E-04 | -0.9 | 0.53 |
| C6orf130 | -0.9 | 5.9E-05 | -1.0 | 1.5E-05 | -0.9 | 0.53 |
| C9orf103 | -0.8 | 1.9E-04 | -1.0 | 5.4E-06 | -0.9 | 0.53 |
| ANXA9    | -1.1 | 1.9E-06 | -0.7 | 7.3E-04 | -0.9 | 0.53 |
| ATP5S    | -1.0 | 1.5E-05 | -0.9 | 6.6E-05 | -0.9 | 0.53 |
| SRXN1    | -0.9 | 6.9E-05 | -1.0 | 1.2E-05 | -0.9 | 0.53 |
| MCAT     | -0.9 | 8.5E-05 | -1.0 | 2.0E-05 | -0.9 | 0.53 |
| GFM1     | -0.8 | 3.4E-04 | -1.1 | 2.2E-06 | -0.9 | 0.53 |
| CCDC103  | -1.0 | 2.3E-05 | -0.9 | 1.4E-04 | -0.9 | 0.53 |
| C1orf144 | -0.9 | 2.4E-05 | -0.9 | 3.3E-05 | -0.9 | 0.53 |
| LGTN     | -0.9 | 4.6E-05 | -1.0 | 1.6E-05 | -0.9 | 0.53 |
| RPL37    | -1.0 | 9.0E-06 | -0.9 | 8.1E-05 | -0.9 | 0.53 |
| BAD      | -1.0 | 1.1E-05 | -0.9 | 6.4E-05 | -0.9 | 0.53 |
| TMEM79   | -0.9 | 1.1E-04 | -1.0 | 8.7E-06 | -0.9 | 0.52 |
| C16orf48 | -1.0 | 1.0E-05 | -0.9 | 6.5E-05 | -0.9 | 0.52 |
| MAGED2   | -1.0 | 7.6E-06 | -0.9 | 8.2E-05 | -0.9 | 0.52 |

|          |      |         |      |         |      |      |
|----------|------|---------|------|---------|------|------|
| NUP37    | -0.9 | 2.5E-05 | -0.9 | 3.6E-05 | -0.9 | 0.52 |
| GTSE1    | -0.8 | 9.1E-04 | -1.0 | 2.5E-05 | -0.9 | 0.52 |
| PCBD1    | -1.0 | 1.4E-05 | -0.9 | 4.1E-05 | -0.9 | 0.52 |
| SAMHD1   | -1.1 | 4.2E-06 | -0.8 | 4.3E-04 | -0.9 | 0.52 |
| CSTF2    | -0.9 | 4.5E-05 | -1.0 | 1.4E-05 | -0.9 | 0.52 |
| CDCA8    | -0.8 | 1.0E-04 | -1.0 | 5.4E-06 | -0.9 | 0.52 |
| EIF3G    | -0.9 | 6.3E-05 | -1.0 | 8.6E-06 | -0.9 | 0.52 |
| KIAA1598 | -1.1 | 8.4E-07 | -0.7 | 7.8E-04 | -0.9 | 0.52 |
| NR2C2AP  | -1.0 | 8.2E-06 | -0.9 | 7.9E-05 | -0.9 | 0.52 |
| DEF6     | -1.0 | 7.4E-05 | -0.8 | 1.3E-04 | -0.9 | 0.52 |
| SDHB     | -1.0 | 9.0E-06 | -0.9 | 5.8E-05 | -0.9 | 0.52 |
| GPR124   | -1.1 | 1.3E-06 | -0.7 | 7.9E-04 | -0.9 | 0.52 |
| PLA2G4A  | -0.9 | 1.2E-04 | -0.9 | 3.7E-05 | -0.9 | 0.52 |
| MRPL50   | -0.9 | 5.6E-05 | -1.0 | 9.0E-06 | -0.9 | 0.52 |
| BNIP1    | -0.8 | 2.8E-04 | -1.1 | 3.7E-06 | -0.9 | 0.52 |
| AHI1     | -0.9 | 1.6E-04 | -1.0 | 8.1E-05 | -0.9 | 0.52 |
| PLK3     | -0.7 | 7.2E-04 | -1.2 | 5.1E-07 | -0.9 | 0.52 |
| NUP43    | -1.0 | 4.3E-06 | -0.8 | 1.0E-04 | -0.9 | 0.52 |
| IFI6     | -1.2 | 3.4E-07 | -0.7 | 9.6E-04 | -0.9 | 0.52 |
| SMARCA4  | -1.0 | 5.3E-06 | -0.9 | 7.8E-05 | -0.9 | 0.52 |
| FOXC1    | -1.0 | 5.3E-06 | -0.9 | 7.9E-05 | -0.9 | 0.52 |
| VGLL4    | -0.9 | 2.8E-05 | -1.0 | 1.6E-05 | -0.9 | 0.52 |
| COBRA1   | -0.9 | 8.4E-05 | -1.0 | 1.5E-05 | -0.9 | 0.52 |
| ZBTB2    | -1.0 | 1.2E-05 | -0.9 | 7.6E-05 | -0.9 | 0.52 |
| RPS9     | -1.0 | 5.8E-06 | -0.9 | 6.7E-05 | -0.9 | 0.52 |
| SFT2D1   | -1.0 | 1.4E-05 | -0.9 | 2.8E-05 | -0.9 | 0.52 |
| CWF19L1  | -0.8 | 7.6E-04 | -1.1 | 1.9E-06 | -0.9 | 0.52 |
| IL7R     | -1.0 | 1.1E-05 | -0.9 | 1.2E-04 | -0.9 | 0.52 |
| PITPNM1  | -1.1 | 3.6E-06 | -0.8 | 8.5E-04 | -0.9 | 0.52 |
| RACGAP1  | -0.9 | 6.6E-05 | -1.0 | 5.4E-06 | -0.9 | 0.52 |
| C1orf198 | -0.9 | 6.5E-05 | -1.0 | 5.4E-06 | -0.9 | 0.52 |
| ID2      | -1.0 | 1.2E-05 | -0.9 | 3.0E-05 | -0.9 | 0.52 |
| PCDHB16  | -0.9 | 8.5E-05 | -1.0 | 1.9E-05 | -0.9 | 0.52 |
| PXMP4    | -0.8 | 5.6E-04 | -1.1 | 1.7E-06 | -0.9 | 0.52 |
| HPS6     | -0.8 | 1.8E-04 | -1.1 | 1.7E-06 | -0.9 | 0.52 |
| LARP6    | -1.0 | 1.1E-05 | -0.9 | 3.0E-05 | -0.9 | 0.52 |
| SYPL1    | -1.0 | 8.9E-06 | -0.9 | 3.8E-05 | -1.0 | 0.52 |
| MAMLD1   | -0.9 | 2.3E-05 | -1.0 | 1.6E-05 | -1.0 | 0.52 |
| SLC19A1  | -0.9 | 5.5E-05 | -1.0 | 1.9E-05 | -1.0 | 0.52 |
| EIF3K    | -1.1 | 1.2E-06 | -0.8 | 2.3E-04 | -1.0 | 0.52 |
| MATN2    | -0.8 | 1.2E-04 | -1.1 | 2.3E-06 | -1.0 | 0.52 |
| GAPDH    | -1.0 | 3.9E-06 | -0.9 | 7.3E-05 | -1.0 | 0.52 |
| PDS5B    | -0.8 | 1.6E-04 | -1.1 | 1.8E-06 | -1.0 | 0.52 |
| SLIT3    | -1.0 | 1.7E-05 | -1.0 | 1.8E-05 | -1.0 | 0.52 |
| ZFH3     | -1.0 | 1.1E-05 | -0.9 | 2.8E-05 | -1.0 | 0.52 |
| LONRF1   | -0.9 | 8.4E-05 | -1.0 | 5.9E-06 | -1.0 | 0.52 |
| AKAP11   | -1.0 | 4.2E-06 | -0.9 | 6.4E-05 | -1.0 | 0.52 |
| ZNF511   | -0.9 | 3.0E-05 | -1.0 | 9.3E-06 | -1.0 | 0.52 |
| UCHL5    | -1.0 | 6.6E-06 | -0.9 | 6.3E-05 | -1.0 | 0.52 |
| COL9A3   | -1.0 | 5.1E-06 | -0.9 | 5.1E-05 | -1.0 | 0.52 |
| NPR1     | -1.0 | 4.4E-05 | -0.9 | 8.4E-05 | -1.0 | 0.52 |
| FLNC     | -0.8 | 2.3E-04 | -1.1 | 1.1E-06 | -1.0 | 0.51 |
| LFNG     | -0.9 | 4.4E-05 | -1.0 | 1.1E-05 | -1.0 | 0.51 |
| SP110    | -0.8 | 1.4E-04 | -1.1 | 2.0E-06 | -1.0 | 0.51 |
| PIM3     | -1.1 | 2.1E-06 | -0.8 | 1.0E-04 | -1.0 | 0.51 |
| C21orf59 | -0.9 | 2.6E-05 | -1.0 | 8.9E-06 | -1.0 | 0.51 |
| BCL7C    | -1.1 | 1.5E-06 | -0.8 | 1.4E-04 | -1.0 | 0.51 |
| LPL      | -0.9 | 7.1E-05 | -1.0 | 5.4E-06 | -1.0 | 0.51 |
| ASPH     | -0.9 | 2.3E-04 | -1.0 | 2.6E-05 | -1.0 | 0.51 |
| DSG2     | -0.8 | 9.9E-04 | -1.1 | 5.3E-06 | -1.0 | 0.51 |
| ECT2     | -1.0 | 7.0E-05 | -1.0 | 2.1E-05 | -1.0 | 0.51 |
| HMCN2    | -1.1 | 7.6E-07 | -0.8 | 3.1E-04 | -1.0 | 0.51 |

|            |      |         |      |         |      |      |
|------------|------|---------|------|---------|------|------|
| VAMP7      | -0.8 | 2.3E-04 | -1.1 | 8.4E-07 | -1.0 | 0.51 |
| TTC15      | -0.9 | 6.2E-05 | -1.0 | 4.3E-06 | -1.0 | 0.51 |
| PTPRG      | -0.8 | 9.5E-04 | -1.1 | 5.4E-06 | -1.0 | 0.51 |
| SEPHS2     | -0.9 | 3.6E-05 | -1.0 | 5.9E-06 | -1.0 | 0.51 |
| DISC1      | -0.9 | 5.5E-05 | -1.0 | 1.0E-05 | -1.0 | 0.51 |
| MTDH       | -1.0 | 1.5E-05 | -1.0 | 1.4E-05 | -1.0 | 0.51 |
| ST6GALNAC6 | -0.8 | 1.7E-04 | -1.1 | 1.4E-06 | -1.0 | 0.51 |
| TSPAN12    | -1.0 | 1.8E-05 | -1.0 | 1.9E-05 | -1.0 | 0.51 |
| WDR5       | -0.8 | 8.0E-04 | -1.2 | 7.5E-07 | -1.0 | 0.51 |
| C2orf29    | -0.9 | 5.0E-05 | -1.0 | 4.1E-06 | -1.0 | 0.51 |
| PBX1       | -1.0 | 1.4E-05 | -0.9 | 2.7E-05 | -1.0 | 0.51 |
| ENTPD2     | -1.0 | 7.1E-06 | -0.9 | 2.9E-05 | -1.0 | 0.51 |
| RPL39      | -1.2 | 3.7E-07 | -0.8 | 4.1E-04 | -1.0 | 0.51 |
| ARHGAP29   | -0.8 | 4.0E-04 | -1.1 | 4.2E-06 | -1.0 | 0.51 |
| NECAB3     | -0.9 | 7.3E-05 | -1.0 | 4.5E-06 | -1.0 | 0.51 |
| SLC25A17   | -1.0 | 5.9E-06 | -0.9 | 3.1E-05 | -1.0 | 0.51 |
| NTHL1      | -1.0 | 2.1E-05 | -1.0 | 1.1E-05 | -1.0 | 0.51 |
| CCR5       | -1.0 | 4.5E-05 | -1.0 | 2.5E-05 | -1.0 | 0.51 |
| UTP18      | -1.0 | 1.1E-05 | -1.0 | 1.5E-05 | -1.0 | 0.51 |
| U2AF1      | -1.1 | 6.8E-07 | -0.8 | 2.0E-04 | -1.0 | 0.51 |
| SLC25A32   | -1.1 | 2.9E-06 | -0.9 | 7.0E-05 | -1.0 | 0.51 |
| EMG1       | -0.9 | 4.2E-05 | -1.0 | 3.5E-06 | -1.0 | 0.51 |
| CKAP2      | -1.0 | 4.6E-06 | -0.9 | 3.8E-05 | -1.0 | 0.51 |
| PRPH2      | -1.1 | 2.6E-05 | -0.8 | 3.4E-04 | -1.0 | 0.51 |
| DMKN       | -0.9 | 2.7E-05 | -1.0 | 5.5E-06 | -1.0 | 0.51 |
| INHBB      | -1.0 | 1.7E-05 | -1.0 | 8.9E-06 | -1.0 | 0.51 |
| PCMT1      | -0.9 | 2.0E-05 | -1.0 | 7.5E-06 | -1.0 | 0.51 |
| OVOS2      | -0.9 | 3.9E-05 | -1.0 | 7.3E-06 | -1.0 | 0.51 |
| ECSIT      | -1.0 | 1.2E-05 | -1.0 | 1.2E-05 | -1.0 | 0.51 |
| PSMB3      | -1.0 | 6.6E-06 | -0.9 | 2.1E-05 | -1.0 | 0.51 |
| PDGFRA     | -1.0 | 1.1E-05 | -1.0 | 1.3E-05 | -1.0 | 0.51 |
| C21orf96   | -0.9 | 4.9E-05 | -1.0 | 8.6E-06 | -1.0 | 0.51 |
| ITPKA      | -1.0 | 1.0E-05 | -1.0 | 1.7E-05 | -1.0 | 0.51 |
| MID1IP1    | -0.9 | 5.7E-05 | -1.1 | 2.3E-06 | -1.0 | 0.51 |
| TIMP4      | -1.1 | 1.3E-06 | -0.8 | 2.4E-04 | -1.0 | 0.51 |
| GTPBP1     | -0.9 | 7.4E-05 | -1.0 | 6.1E-06 | -1.0 | 0.51 |
| C2orf7     | -0.9 | 8.4E-05 | -1.0 | 9.4E-06 | -1.0 | 0.51 |
| RAB11FIP4  | -0.9 | 9.5E-05 | -1.1 | 1.3E-06 | -1.0 | 0.51 |
| VPS37B     | -1.0 | 6.1E-06 | -0.9 | 2.2E-05 | -1.0 | 0.51 |
| FAHD2B     | -1.0 | 1.4E-05 | -1.0 | 9.2E-06 | -1.0 | 0.51 |
| PSMD4      | -0.9 | 2.2E-05 | -1.0 | 5.6E-06 | -1.0 | 0.51 |
| LATS2      | -0.8 | 1.5E-04 | -1.1 | 7.5E-07 | -1.0 | 0.51 |
| ENG        | -1.2 | 2.7E-07 | -0.7 | 7.6E-04 | -1.0 | 0.51 |
| PDCD4      | -0.9 | 1.9E-05 | -1.0 | 6.1E-06 | -1.0 | 0.51 |
| FNDC4      | -0.9 | 1.2E-04 | -1.1 | 3.3E-06 | -1.0 | 0.51 |
| TOMM7      | -1.1 | 2.4E-06 | -0.9 | 4.5E-05 | -1.0 | 0.51 |
| ALAD       | -1.0 | 2.6E-05 | -1.0 | 3.0E-05 | -1.0 | 0.51 |
| CDCA5      | -0.9 | 6.4E-05 | -1.1 | 1.7E-06 | -1.0 | 0.51 |
| RPL29      | -0.9 | 5.5E-05 | -1.1 | 1.9E-06 | -1.0 | 0.51 |
| GALK1      | -1.1 | 1.3E-05 | -0.9 | 2.4E-04 | -1.0 | 0.51 |
| VASN       | -0.8 | 2.1E-04 | -1.2 | 4.3E-07 | -1.0 | 0.51 |
| ITGB3BP    | -1.1 | 1.4E-05 | -0.9 | 6.4E-05 | -1.0 | 0.51 |
| ATP5G1     | -1.0 | 5.2E-06 | -0.9 | 1.9E-05 | -1.0 | 0.51 |
| COX11      | -0.9 | 5.2E-05 | -1.1 | 2.1E-06 | -1.0 | 0.50 |
| AKAP12     | -1.1 | 2.6E-06 | -0.9 | 5.1E-05 | -1.0 | 0.50 |
| PDE1B      | -0.9 | 1.3E-04 | -1.0 | 2.3E-05 | -1.0 | 0.50 |
| GOSR2      | -1.0 | 6.0E-05 | -1.0 | 4.7E-05 | -1.0 | 0.50 |
| NANS       | -1.0 | 1.1E-05 | -1.0 | 8.4E-06 | -1.0 | 0.50 |
| NINJ1      | -1.0 | 1.7E-05 | -1.0 | 5.4E-06 | -1.0 | 0.50 |
| ZNF3       | -0.9 | 3.2E-05 | -1.1 | 3.4E-06 | -1.0 | 0.50 |
| FAM63A     | -0.9 | 5.7E-05 | -1.1 | 1.6E-06 | -1.0 | 0.50 |
| RNMT       | -0.9 | 5.7E-04 | -1.0 | 1.8E-04 | -1.0 | 0.50 |

|          |      |         |      |         |      |      |
|----------|------|---------|------|---------|------|------|
| ACAA2    | -0.9 | 3.3E-05 | -1.1 | 2.6E-06 | -1.0 | 0.50 |
| PPM1D    | -1.0 | 1.8E-05 | -1.0 | 2.5E-05 | -1.0 | 0.50 |
| RACGAP1P | -0.9 | 6.6E-05 | -1.1 | 1.2E-05 | -1.0 | 0.50 |
| PELI3    | -1.0 | 1.3E-05 | -1.0 | 6.9E-06 | -1.0 | 0.50 |
| ADCY3    | -0.9 | 5.8E-05 | -1.1 | 1.3E-06 | -1.0 | 0.50 |
| FNBP4    | -0.9 | 1.4E-04 | -1.1 | 1.2E-06 | -1.0 | 0.50 |
| NIF3L1   | -0.9 | 7.2E-05 | -1.1 | 1.0E-06 | -1.0 | 0.50 |
| PHLDB1   | -0.9 | 5.9E-05 | -1.1 | 2.5E-06 | -1.0 | 0.50 |
| STK40    | -1.1 | 2.9E-06 | -0.9 | 2.5E-05 | -1.0 | 0.50 |
| VAMP2    | -1.0 | 1.6E-05 | -1.0 | 2.3E-05 | -1.0 | 0.50 |
| SRGAP1   | -1.2 | 8.6E-07 | -0.8 | 2.0E-04 | -1.0 | 0.50 |
| KLHDC1   | -1.1 | 1.8E-05 | -0.9 | 5.1E-05 | -1.0 | 0.50 |
| C2       | -1.1 | 1.5E-06 | -0.9 | 4.2E-05 | -1.0 | 0.50 |
| TROAP    | -1.0 | 4.1E-06 | -1.0 | 1.7E-05 | -1.0 | 0.50 |
| RHOU     | -1.0 | 2.0E-05 | -1.0 | 7.4E-06 | -1.0 | 0.50 |
| CBX7     | -0.9 | 4.3E-05 | -1.1 | 1.4E-06 | -1.0 | 0.50 |
| NFKBIA   | -1.2 | 2.5E-07 | -0.8 | 2.1E-04 | -1.0 | 0.50 |
| SLC1A1   | -1.0 | 5.0E-05 | -1.0 | 3.0E-05 | -1.0 | 0.50 |
| RAPGEF3  | -0.9 | 9.9E-04 | -1.1 | 2.0E-05 | -1.0 | 0.50 |
| DNALI1   | -1.0 | 4.2E-06 | -1.0 | 1.5E-05 | -1.0 | 0.50 |
| NUP214   | -1.2 | 1.1E-06 | -0.8 | 1.6E-04 | -1.0 | 0.50 |
| TMEM51   | -1.1 | 1.1E-06 | -0.9 | 4.9E-05 | -1.0 | 0.50 |
| HIST1H4L | -1.2 | 1.1E-07 | -0.8 | 4.0E-04 | -1.0 | 0.50 |
| CCDC56   | -1.1 | 2.1E-06 | -0.9 | 2.5E-05 | -1.0 | 0.50 |
| SERINC2  | -1.1 | 2.2E-06 | -0.9 | 1.6E-04 | -1.0 | 0.50 |
| GPX2     | -0.9 | 2.4E-05 | -1.1 | 2.9E-06 | -1.0 | 0.50 |
| ALAS2    | -1.1 | 1.5E-06 | -0.9 | 6.1E-05 | -1.0 | 0.50 |
| TMEM61   | -0.9 | 2.9E-04 | -1.1 | 3.1E-06 | -1.0 | 0.50 |
| SHFM1    | -1.1 | 9.2E-07 | -0.9 | 5.5E-05 | -1.0 | 0.50 |
| CTSH     | -1.1 | 1.8E-06 | -0.9 | 2.8E-05 | -1.0 | 0.50 |
| CFHR2    | -0.9 | 2.5E-05 | -1.1 | 2.2E-06 | -1.0 | 0.50 |
| MELK     | -1.0 | 1.6E-05 | -1.0 | 4.0E-06 | -1.0 | 0.50 |
| FAM50B   | -1.1 | 4.1E-06 | -1.0 | 1.9E-05 | -1.0 | 0.50 |
| DNASE1L1 | -1.1 | 1.4E-06 | -0.9 | 9.4E-05 | -1.0 | 0.50 |
| ARFGAP3  | -0.9 | 3.4E-05 | -1.1 | 1.8E-06 | -1.0 | 0.50 |
| PACSIN2  | -0.9 | 3.4E-05 | -1.1 | 1.8E-06 | -1.0 | 0.50 |
| DHX58    | -0.9 | 3.4E-05 | -1.1 | 1.4E-06 | -1.0 | 0.50 |
| TPX2     | -1.0 | 5.2E-06 | -1.0 | 1.1E-05 | -1.0 | 0.50 |
| POLR2K   | -1.0 | 1.3E-05 | -1.0 | 3.9E-06 | -1.0 | 0.50 |
| RAGE     | -1.1 | 1.4E-06 | -0.9 | 3.5E-05 | -1.0 | 0.50 |
| IFI27L1  | -1.0 | 4.1E-06 | -1.0 | 1.1E-05 | -1.0 | 0.50 |
| PTPLA    | -1.1 | 4.4E-05 | -0.9 | 2.7E-04 | -1.0 | 0.50 |
| KAZ      | -0.9 | 4.2E-05 | -1.1 | 1.1E-06 | -1.0 | 0.50 |
| RNASEH2B | -1.0 | 3.5E-06 | -1.0 | 1.3E-05 | -1.0 | 0.50 |
| APOD     | -1.2 | 3.0E-07 | -0.8 | 2.7E-04 | -1.0 | 0.50 |
| CAPZA2   | -1.0 | 1.5E-05 | -1.1 | 2.8E-06 | -1.0 | 0.50 |
| IFIT2    | -1.0 | 7.3E-06 | -1.0 | 6.5E-06 | -1.0 | 0.50 |
| RANGRF   | -1.0 | 1.4E-05 | -1.0 | 3.6E-06 | -1.0 | 0.50 |
| FUT10    | -0.9 | 2.9E-04 | -1.1 | 1.5E-06 | -1.0 | 0.50 |
| RPS6KA3  | -1.1 | 1.0E-06 | -0.9 | 5.8E-05 | -1.0 | 0.50 |
| MSRB2    | -1.0 | 1.2E-05 | -1.0 | 3.3E-06 | -1.0 | 0.50 |
| PCOLCE   | -1.1 | 9.3E-07 | -0.9 | 4.2E-05 | -1.0 | 0.50 |
| ELF3     | -1.0 | 1.6E-05 | -1.1 | 2.6E-06 | -1.0 | 0.50 |
| N4BP2L1  | -0.9 | 3.4E-05 | -1.1 | 1.2E-06 | -1.0 | 0.50 |
| FAM86B1  | -1.1 | 3.7E-05 | -0.9 | 8.9E-05 | -1.0 | 0.50 |
| TRIM4    | -1.0 | 2.7E-05 | -1.1 | 2.7E-06 | -1.0 | 0.50 |
| TRAPPC6A | -1.0 | 3.7E-06 | -1.0 | 9.9E-06 | -1.0 | 0.49 |
| ALS2     | -1.1 | 9.7E-04 | -1.0 | 5.5E-04 | -1.0 | 0.49 |
| BIRC5    | -1.0 | 1.3E-05 | -1.1 | 2.6E-06 | -1.0 | 0.49 |
| AKR1C3   | -1.1 | 1.0E-06 | -0.9 | 3.3E-05 | -1.0 | 0.49 |
| SEPT9    | -0.9 | 2.7E-05 | -1.1 | 1.2E-06 | -1.0 | 0.49 |
| FBXO4    | -1.1 | 2.4E-06 | -1.0 | 1.9E-05 | -1.0 | 0.49 |

|              |      |         |      |         |      |      |
|--------------|------|---------|------|---------|------|------|
| GCAT         | -1.1 | 4.4E-05 | -1.0 | 9.7E-05 | -1.0 | 0.49 |
| VAMP8        | -1.0 | 4.9E-06 | -1.0 | 6.6E-06 | -1.0 | 0.49 |
| TBL1XR1      | -1.0 | 1.9E-05 | -1.0 | 5.0E-06 | -1.0 | 0.49 |
| CTSK         | -1.0 | 1.4E-05 | -1.1 | 2.2E-06 | -1.0 | 0.49 |
| AKAP1        | -1.1 | 1.1E-06 | -0.9 | 2.7E-05 | -1.0 | 0.49 |
| MFAP2        | -1.1 | 1.5E-06 | -0.9 | 2.0E-05 | -1.0 | 0.49 |
| PLOD1        | -0.9 | 3.7E-05 | -1.1 | 7.5E-07 | -1.0 | 0.49 |
| HDGF         | -1.0 | 4.8E-06 | -1.0 | 5.9E-06 | -1.0 | 0.49 |
| SLIT1        | -1.2 | 3.3E-07 | -0.8 | 1.5E-04 | -1.0 | 0.49 |
| RPS12        | -1.3 | 5.7E-08 | -0.8 | 3.6E-04 | -1.0 | 0.49 |
| TECR         | -1.2 | 5.0E-07 | -0.9 | 5.0E-05 | -1.0 | 0.49 |
| SNX9         | -0.9 | 6.2E-05 | -1.2 | 3.9E-07 | -1.0 | 0.49 |
| ENO1         | -0.9 | 2.4E-05 | -1.1 | 1.0E-06 | -1.0 | 0.49 |
| C7orf49      | -0.9 | 1.9E-05 | -1.1 | 1.3E-06 | -1.0 | 0.49 |
| ILK          | -1.0 | 6.5E-06 | -1.0 | 4.1E-06 | -1.0 | 0.49 |
| MYO5C        | -1.0 | 1.0E-05 | -1.0 | 3.8E-06 | -1.0 | 0.49 |
| SRCRB4D      | -1.1 | 3.4E-06 | -1.0 | 9.3E-06 | -1.0 | 0.49 |
| GDF15        | -1.0 | 1.1E-05 | -1.1 | 2.2E-06 | -1.0 | 0.49 |
| APOL3        | -1.1 | 3.4E-06 | -1.0 | 8.5E-06 | -1.0 | 0.49 |
| FCGRT        | -1.1 | 1.9E-06 | -1.0 | 1.2E-05 | -1.0 | 0.49 |
| NXT1         | -1.0 | 7.4E-06 | -1.0 | 3.3E-06 | -1.0 | 0.49 |
| EMILIN2      | -1.0 | 1.6E-05 | -1.1 | 1.4E-06 | -1.0 | 0.49 |
| PBLD         | -1.3 | 4.7E-07 | -0.8 | 7.0E-04 | -1.0 | 0.49 |
| MGP          | -1.2 | 2.8E-07 | -0.9 | 7.7E-05 | -1.0 | 0.49 |
| SLC25A16     | -0.8 | 4.8E-04 | -1.2 | 4.3E-07 | -1.0 | 0.49 |
| OLFML1       | -1.0 | 9.4E-06 | -1.0 | 9.6E-06 | -1.0 | 0.49 |
| SRPR         | -1.1 | 1.9E-06 | -0.9 | 2.8E-05 | -1.0 | 0.49 |
| ARHGEF3      | -0.9 | 5.2E-05 | -1.2 | 5.3E-07 | -1.0 | 0.49 |
| BEND5        | -1.1 | 7.8E-07 | -0.9 | 3.1E-05 | -1.0 | 0.49 |
| HPCAL1       | -1.1 | 5.0E-06 | -1.0 | 3.0E-05 | -1.0 | 0.49 |
| TRIM6        | -0.8 | 3.9E-04 | -1.2 | 1.0E-06 | -1.0 | 0.49 |
| TRIM6-TRIM34 | -0.8 | 3.9E-04 | -1.2 | 1.0E-06 | -1.0 | 0.49 |
| TSPAN4       | -0.9 | 2.2E-05 | -1.1 | 9.3E-07 | -1.0 | 0.49 |
| FASTKD5      | -1.3 | 7.7E-08 | -0.8 | 2.2E-04 | -1.0 | 0.49 |
| GPRASP1      | -1.0 | 2.0E-05 | -1.1 | 1.1E-06 | -1.0 | 0.49 |
| SH3TC1       | -1.2 | 2.3E-06 | -0.8 | 5.0E-04 | -1.0 | 0.49 |
| AP1B1        | -1.1 | 3.9E-06 | -1.0 | 2.7E-05 | -1.0 | 0.49 |
| ESD          | -1.0 | 5.1E-06 | -1.0 | 3.8E-06 | -1.0 | 0.49 |
| POLR2D       | -1.2 | 5.7E-07 | -0.9 | 3.9E-05 | -1.0 | 0.49 |
| DKK3         | -1.0 | 6.2E-06 | -1.1 | 2.9E-06 | -1.0 | 0.49 |
| VIM          | -1.2 | 2.3E-07 | -0.9 | 6.8E-05 | -1.0 | 0.49 |
| FLRT3        | -1.1 | 1.7E-06 | -1.0 | 1.4E-05 | -1.0 | 0.49 |
| ALDOC        | -1.1 | 3.0E-06 | -1.0 | 6.8E-06 | -1.0 | 0.49 |
| UTP20        | -0.9 | 1.5E-04 | -1.2 | 2.9E-07 | -1.0 | 0.49 |
| TSPAN6       | -1.0 | 7.6E-06 | -1.1 | 2.1E-06 | -1.0 | 0.49 |
| EIF2B5       | -0.9 | 2.2E-05 | -1.1 | 7.4E-07 | -1.0 | 0.49 |
| KIAA0586     | -1.1 | 4.0E-05 | -1.0 | 2.9E-05 | -1.0 | 0.49 |
| ST13         | -0.9 | 3.4E-05 | -1.2 | 4.1E-07 | -1.0 | 0.49 |
| DCAF11       | -0.9 | 8.1E-05 | -1.2 | 5.4E-07 | -1.0 | 0.49 |
| SEPT10       | -0.9 | 1.6E-04 | -1.2 | 1.9E-06 | -1.0 | 0.49 |
| C19orf63     | -1.0 | 4.5E-06 | -1.1 | 3.2E-06 | -1.0 | 0.49 |
| TMEM123      | -1.1 | 1.1E-06 | -1.0 | 1.5E-05 | -1.0 | 0.49 |
| DCPS         | -0.9 | 6.9E-05 | -1.2 | 1.8E-07 | -1.0 | 0.49 |
| FBL          | -1.2 | 1.3E-07 | -0.9 | 9.0E-05 | -1.0 | 0.49 |
| NAGA         | -0.9 | 9.0E-05 | -1.2 | 1.4E-07 | -1.0 | 0.49 |
| YARS         | -1.1 | 4.2E-06 | -1.0 | 1.4E-05 | -1.0 | 0.49 |
| CARD6        | -0.9 | 9.2E-05 | -1.2 | 1.4E-07 | -1.0 | 0.49 |
| EXOC7        | -0.9 | 4.3E-05 | -1.2 | 3.1E-07 | -1.0 | 0.49 |
| ECH1         | -0.9 | 3.5E-05 | -1.2 | 3.2E-07 | -1.0 | 0.48 |
| CD44         | -1.0 | 1.2E-05 | -1.1 | 1.1E-06 | -1.0 | 0.48 |
| SLC4A11      | -0.9 | 3.2E-05 | -1.2 | 4.5E-07 | -1.0 | 0.48 |
| ADAMTS2      | -1.1 | 4.8E-06 | -1.0 | 5.2E-06 | -1.0 | 0.48 |

|          |      |         |      |         |      |      |
|----------|------|---------|------|---------|------|------|
| IFI35    | -1.1 | 4.3E-06 | -1.0 | 6.5E-06 | -1.0 | 0.48 |
| TMPO     | -1.0 | 2.6E-05 | -1.1 | 4.5E-06 | -1.0 | 0.48 |
| U2AF1L4  | -1.0 | 6.2E-05 | -1.1 | 1.5E-05 | -1.0 | 0.48 |
| CXorf40B | -1.0 | 3.3E-06 | -1.0 | 3.7E-06 | -1.0 | 0.48 |
| RGS3     | -1.1 | 3.2E-06 | -1.0 | 5.9E-06 | -1.0 | 0.48 |
| PAQR5    | -1.0 | 2.0E-04 | -1.1 | 3.9E-05 | -1.0 | 0.48 |
| PRELID2  | -1.1 | 8.7E-06 | -1.0 | 7.5E-06 | -1.0 | 0.48 |
| FSTL1    | -1.0 | 1.4E-05 | -1.1 | 8.0E-07 | -1.0 | 0.48 |
| PSMC2    | -1.1 | 9.5E-07 | -0.9 | 2.3E-05 | -1.0 | 0.48 |
| AATF     | -1.1 | 1.8E-06 | -1.0 | 6.5E-06 | -1.0 | 0.48 |
| ACVR1    | -0.9 | 3.4E-05 | -1.2 | 3.2E-07 | -1.0 | 0.48 |
| SURF1    | -1.0 | 1.7E-05 | -1.1 | 6.9E-07 | -1.0 | 0.48 |
| PNMT     | -1.2 | 3.9E-06 | -0.9 | 1.8E-04 | -1.0 | 0.48 |
| HMGB2    | -1.1 | 1.7E-06 | -1.0 | 6.6E-06 | -1.0 | 0.48 |
| KIF9     | -1.1 | 6.7E-07 | -1.0 | 1.8E-05 | -1.0 | 0.48 |
| KIF20A   | -1.1 | 1.8E-05 | -1.0 | 2.4E-05 | -1.0 | 0.48 |
| EGFL6    | -1.2 | 3.8E-06 | -0.9 | 1.4E-04 | -1.0 | 0.48 |
| ACP5     | -0.9 | 3.7E-05 | -1.2 | 2.6E-07 | -1.0 | 0.48 |
| WDR34    | -1.1 | 2.1E-06 | -1.0 | 5.4E-06 | -1.1 | 0.48 |
| RGL1     | -1.2 | 1.1E-07 | -0.9 | 8.6E-05 | -1.1 | 0.48 |
| OIP5     | -1.1 | 3.3E-06 | -1.1 | 3.1E-06 | -1.1 | 0.48 |
| SEC24C   | -1.2 | 3.5E-07 | -0.9 | 3.5E-05 | -1.1 | 0.48 |
| CPVL     | -1.0 | 1.7E-05 | -1.2 | 5.3E-07 | -1.1 | 0.48 |
| MECOM    | -1.1 | 3.3E-06 | -1.1 | 3.2E-06 | -1.1 | 0.48 |
| CIAO1    | -1.1 | 2.4E-06 | -1.0 | 4.4E-06 | -1.1 | 0.48 |
| CD247    | -1.0 | 1.3E-04 | -1.1 | 4.8E-06 | -1.1 | 0.48 |
| PLEKHG5  | -0.9 | 2.4E-05 | -1.2 | 4.5E-07 | -1.1 | 0.48 |
| ARHGDI1  | -1.0 | 1.2E-05 | -1.1 | 7.7E-07 | -1.1 | 0.48 |
| CEBPE    | -1.1 | 8.7E-06 | -1.0 | 9.2E-06 | -1.1 | 0.48 |
| NPNT     | -1.2 | 6.8E-07 | -1.0 | 1.7E-05 | -1.1 | 0.48 |
| POLDIP2  | -1.3 | 4.8E-07 | -0.9 | 2.4E-04 | -1.1 | 0.48 |
| ADCY4    | -1.0 | 8.4E-06 | -1.1 | 1.1E-06 | -1.1 | 0.48 |
| C20orf29 | -1.1 | 2.0E-06 | -1.0 | 5.5E-06 | -1.1 | 0.48 |
| NCKAP1   | -1.0 | 4.9E-06 | -1.1 | 2.0E-06 | -1.1 | 0.48 |
| DAPK1    | -1.1 | 1.2E-06 | -1.0 | 8.9E-06 | -1.1 | 0.48 |
| CHPT1    | -1.0 | 4.1E-06 | -1.1 | 2.4E-06 | -1.1 | 0.48 |
| MGST1    | -1.2 | 1.8E-07 | -0.9 | 4.1E-05 | -1.1 | 0.48 |
| EIF6     | -1.2 | 3.5E-07 | -0.9 | 2.2E-05 | -1.1 | 0.48 |
| FZD4     | -1.1 | 1.3E-06 | -1.0 | 6.0E-06 | -1.1 | 0.48 |
| EWSR1    | -1.0 | 1.6E-05 | -1.2 | 6.3E-07 | -1.1 | 0.48 |
| ASF1B    | -1.2 | 4.7E-07 | -0.9 | 2.5E-05 | -1.1 | 0.48 |
| DDX49    | -1.0 | 1.7E-05 | -1.1 | 8.1E-07 | -1.1 | 0.48 |
| GSDMD    | -1.4 | 1.1E-08 | -0.7 | 5.2E-04 | -1.1 | 0.48 |
| CD164    | -1.2 | 1.7E-07 | -0.9 | 3.7E-05 | -1.1 | 0.48 |
| WBSCR22  | -1.0 | 5.9E-06 | -1.1 | 1.2E-06 | -1.1 | 0.48 |
| C20orf27 | -1.3 | 8.9E-07 | -0.8 | 5.6E-04 | -1.1 | 0.48 |
| GLUD2    | -1.0 | 1.9E-05 | -1.2 | 3.8E-07 | -1.1 | 0.48 |
| HYI      | -1.2 | 5.4E-07 | -1.0 | 1.2E-05 | -1.1 | 0.48 |
| BFSP1    | -0.9 | 6.1E-05 | -1.2 | 1.5E-07 | -1.1 | 0.48 |
| ARL2     | -1.0 | 1.1E-05 | -1.1 | 7.1E-07 | -1.1 | 0.48 |
| OBFC1    | -1.1 | 8.3E-07 | -1.0 | 8.4E-06 | -1.1 | 0.48 |
| HPSE     | -1.1 | 6.6E-05 | -1.1 | 3.7E-05 | -1.1 | 0.48 |
| NFKB1    | -1.0 | 5.5E-06 | -1.1 | 1.2E-06 | -1.1 | 0.48 |
| ZNF706   | -1.0 | 1.8E-05 | -1.2 | 3.1E-07 | -1.1 | 0.48 |
| GNL1     | -1.1 | 8.2E-07 | -1.0 | 9.6E-06 | -1.1 | 0.48 |
| MT1M     | -1.1 | 2.3E-06 | -1.1 | 2.6E-06 | -1.1 | 0.48 |
| ECHS1    | -1.2 | 1.5E-07 | -0.9 | 3.5E-05 | -1.1 | 0.48 |
| ESPL1    | -1.2 | 3.3E-07 | -0.9 | 2.2E-05 | -1.1 | 0.48 |
| C8orf33  | -1.1 | 4.3E-06 | -1.1 | 2.0E-06 | -1.1 | 0.48 |
| EFR3A    | -0.9 | 3.1E-05 | -1.2 | 1.7E-07 | -1.1 | 0.48 |
| SDF4     | -1.0 | 7.7E-06 | -1.1 | 6.9E-07 | -1.1 | 0.48 |
| CYBA     | -1.2 | 3.0E-07 | -0.9 | 3.8E-05 | -1.1 | 0.48 |

|           |      |         |      |         |      |      |
|-----------|------|---------|------|---------|------|------|
| RPL30     | -1.2 | 2.0E-07 | -0.9 | 2.5E-05 | -1.1 | 0.48 |
| MMAB      | -0.9 | 3.3E-04 | -1.2 | 4.9E-06 | -1.1 | 0.48 |
| THSD1     | -1.2 | 3.2E-07 | -1.0 | 1.6E-05 | -1.1 | 0.48 |
| PA2G4     | -1.0 | 4.3E-06 | -1.1 | 1.2E-06 | -1.1 | 0.48 |
| C1orf135  | -1.0 | 1.7E-05 | -1.1 | 8.7E-07 | -1.1 | 0.48 |
| SMAD9     | -1.1 | 3.2E-06 | -1.1 | 4.4E-06 | -1.1 | 0.48 |
| TMCO4     | -1.2 | 2.3E-07 | -0.9 | 2.6E-05 | -1.1 | 0.48 |
| GNAQ      | -1.3 | 5.9E-04 | -0.8 | 2.2E-04 | -1.1 | 0.48 |
| BRMS1     | -1.1 | 1.7E-06 | -1.0 | 4.3E-06 | -1.1 | 0.48 |
| TIGD5     | -1.0 | 4.9E-06 | -1.1 | 9.3E-07 | -1.1 | 0.47 |
| PLTP      | -1.3 | 9.4E-08 | -0.9 | 4.7E-05 | -1.1 | 0.47 |
| VAV3      | -1.3 | 4.9E-08 | -0.9 | 8.5E-05 | -1.1 | 0.47 |
| FILIP1L   | -1.2 | 1.4E-07 | -0.9 | 4.3E-05 | -1.1 | 0.47 |
| PER1      | -1.0 | 1.1E-05 | -1.2 | 3.9E-07 | -1.1 | 0.47 |
| RTEL1     | -1.2 | 6.4E-07 | -1.0 | 1.7E-05 | -1.1 | 0.47 |
| TNFRSF6B  | -1.2 | 6.4E-07 | -1.0 | 1.7E-05 | -1.1 | 0.47 |
| MSI2      | -1.2 | 4.8E-07 | -0.9 | 3.2E-05 | -1.1 | 0.47 |
| MRPS12    | -1.0 | 1.2E-05 | -1.2 | 3.5E-07 | -1.1 | 0.47 |
| FOLR1     | -1.2 | 3.1E-07 | -0.9 | 3.0E-05 | -1.1 | 0.47 |
| GPRC5B    | -1.0 | 1.7E-05 | -1.2 | 4.1E-07 | -1.1 | 0.47 |
| AMY2B     | -1.0 | 3.0E-05 | -1.2 | 3.5E-07 | -1.1 | 0.47 |
| TASP1     | -1.2 | 2.0E-07 | -0.9 | 3.2E-05 | -1.1 | 0.47 |
| ZAP70     | -1.4 | 3.6E-06 | -0.8 | 9.3E-04 | -1.1 | 0.47 |
| PRRT1     | -1.4 | 1.5E-08 | -0.8 | 4.3E-04 | -1.1 | 0.47 |
| FAM3B     | -1.0 | 5.3E-06 | -1.1 | 7.8E-07 | -1.1 | 0.47 |
| DHRS4     | -1.1 | 1.2E-06 | -1.0 | 4.6E-06 | -1.1 | 0.47 |
| DHRS4L2   | -1.1 | 1.2E-06 | -1.0 | 4.6E-06 | -1.1 | 0.47 |
| NAPSB     | -1.0 | 2.7E-04 | -1.2 | 8.5E-06 | -1.1 | 0.47 |
| FN1       | -1.0 | 6.5E-06 | -1.1 | 5.6E-07 | -1.1 | 0.47 |
| DIS3L     | -0.9 | 2.2E-05 | -1.2 | 2.1E-07 | -1.1 | 0.47 |
| ITM2B     | -1.2 | 9.4E-08 | -0.9 | 3.6E-05 | -1.1 | 0.47 |
| ZNF689    | -1.1 | 3.8E-05 | -1.0 | 1.1E-04 | -1.1 | 0.47 |
| COL1A2    | -1.2 | 2.9E-07 | -1.0 | 1.2E-05 | -1.1 | 0.47 |
| RERG      | -1.3 | 1.2E-06 | -0.9 | 1.3E-04 | -1.1 | 0.47 |
| EPHX4     | -1.1 | 6.0E-05 | -1.1 | 2.2E-05 | -1.1 | 0.47 |
| RLIM      | -1.2 | 4.0E-07 | -1.0 | 8.1E-06 | -1.1 | 0.47 |
| CCL2      | -1.0 | 5.5E-06 | -1.1 | 1.0E-06 | -1.1 | 0.47 |
| C12orf35  | -0.9 | 3.3E-05 | -1.3 | 8.7E-08 | -1.1 | 0.47 |
| NDN       | -1.1 | 2.4E-06 | -1.1 | 1.3E-06 | -1.1 | 0.47 |
| GABARAPL1 | -1.1 | 1.1E-06 | -1.1 | 2.8E-06 | -1.1 | 0.47 |
| SLC25A5   | -1.1 | 1.4E-06 | -1.1 | 2.1E-06 | -1.1 | 0.47 |
| KIAA1683  | -1.0 | 6.9E-06 | -1.2 | 4.1E-07 | -1.1 | 0.47 |
| BACE2     | -1.0 | 4.3E-06 | -1.1 | 6.3E-07 | -1.1 | 0.47 |
| SPG20     | -0.9 | 3.8E-05 | -1.3 | 1.0E-07 | -1.1 | 0.47 |
| ITFG2     | -1.2 | 1.0E-07 | -0.9 | 2.7E-05 | -1.1 | 0.47 |
| HTR1E     | -1.3 | 3.8E-07 | -0.9 | 1.6E-04 | -1.1 | 0.47 |
| HIPK1     | -1.2 | 1.8E-07 | -1.0 | 1.6E-05 | -1.1 | 0.47 |
| REPIN1    | -0.8 | 2.7E-04 | -1.4 | 7.0E-09 | -1.1 | 0.47 |
| CHCHD5    | -1.0 | 7.1E-06 | -1.2 | 3.3E-07 | -1.1 | 0.47 |
| WWP2      | -1.3 | 2.5E-08 | -0.9 | 8.7E-05 | -1.1 | 0.47 |
| DUT       | -0.9 | 2.8E-05 | -1.3 | 7.5E-08 | -1.1 | 0.47 |
| EPC1      | -1.3 | 4.1E-07 | -0.9 | 2.8E-04 | -1.1 | 0.47 |
| GLUD1     | -1.2 | 1.4E-07 | -1.0 | 1.6E-05 | -1.1 | 0.47 |
| TCEAL4    | -1.3 | 7.5E-08 | -0.9 | 2.7E-05 | -1.1 | 0.47 |
| MEPCE     | -1.1 | 3.5E-06 | -1.1 | 7.1E-07 | -1.1 | 0.47 |
| DAB2      | -1.2 | 3.8E-07 | -1.0 | 5.6E-06 | -1.1 | 0.47 |
| TREX1     | -1.0 | 2.7E-05 | -1.2 | 2.0E-07 | -1.1 | 0.47 |
| HEBP1     | -1.0 | 1.7E-05 | -1.2 | 1.2E-07 | -1.1 | 0.47 |
| ZFAND2A   | -1.4 | 2.3E-08 | -0.8 | 2.4E-04 | -1.1 | 0.47 |
| APBB1IP   | -1.2 | 6.0E-07 | -1.0 | 9.3E-06 | -1.1 | 0.47 |
| GYPC      | -1.3 | 2.8E-08 | -0.9 | 7.7E-05 | -1.1 | 0.47 |
| SGK2      | -1.1 | 2.4E-06 | -1.1 | 2.9E-06 | -1.1 | 0.47 |

|          |      |         |      |         |      |      |
|----------|------|---------|------|---------|------|------|
| BDH2     | -1.1 | 1.3E-06 | -1.1 | 1.4E-06 | -1.1 | 0.47 |
| HELQ     | -1.1 | 2.6E-05 | -1.1 | 3.2E-06 | -1.1 | 0.47 |
| HOXB13   | -1.4 | 9.4E-09 | -0.8 | 2.0E-04 | -1.1 | 0.47 |
| GUK1     | -1.0 | 1.6E-05 | -1.2 | 1.0E-07 | -1.1 | 0.47 |
| GBP2     | -1.1 | 7.2E-07 | -1.1 | 2.8E-06 | -1.1 | 0.47 |
| TRIB2    | -1.1 | 1.5E-06 | -1.1 | 1.1E-06 | -1.1 | 0.47 |
| GRHL2    | -1.1 | 4.9E-06 | -1.1 | 1.1E-06 | -1.1 | 0.47 |
| CDK5RAP2 | -1.0 | 7.5E-06 | -1.2 | 2.3E-07 | -1.1 | 0.47 |
| TPM1     | -1.0 | 4.5E-06 | -1.2 | 3.5E-07 | -1.1 | 0.47 |
| TMEM173  | -1.2 | 2.2E-07 | -1.0 | 7.4E-06 | -1.1 | 0.47 |
| PDK2     | -1.3 | 2.9E-08 | -0.9 | 5.1E-05 | -1.1 | 0.47 |
| ANAPC1   | -1.1 | 6.1E-07 | -1.1 | 2.6E-06 | -1.1 | 0.47 |
| HIST1H3G | -1.0 | 5.8E-06 | -1.2 | 2.6E-07 | -1.1 | 0.47 |
| SPN      | -1.2 | 7.3E-07 | -1.0 | 8.4E-06 | -1.1 | 0.47 |
| SCYL3    | -1.1 | 2.0E-06 | -1.1 | 9.4E-07 | -1.1 | 0.46 |
| MAPK10   | -1.3 | 7.9E-07 | -0.9 | 1.2E-04 | -1.1 | 0.46 |
| SDR16C5  | -1.1 | 3.4E-06 | -1.1 | 2.1E-06 | -1.1 | 0.46 |
| PSMA3    | -1.1 | 1.3E-06 | -1.1 | 1.0E-06 | -1.1 | 0.46 |
| WWTR1    | -1.0 | 3.7E-05 | -1.2 | 4.7E-07 | -1.1 | 0.46 |
| IFITM2   | -1.2 | 1.7E-07 | -1.0 | 7.7E-06 | -1.1 | 0.46 |
| SSBP3    | -1.2 | 2.2E-07 | -1.0 | 6.0E-06 | -1.1 | 0.46 |
| THEM4    | -1.1 | 1.1E-05 | -1.2 | 1.3E-06 | -1.1 | 0.46 |
| ETV2     | -1.1 | 1.5E-05 | -1.1 | 1.6E-05 | -1.1 | 0.46 |
| RELB     | -1.1 | 6.1E-07 | -1.1 | 2.1E-06 | -1.1 | 0.46 |
| OCEL1    | -1.1 | 4.3E-06 | -1.1 | 9.2E-07 | -1.1 | 0.46 |
| C1orf112 | -1.0 | 7.5E-06 | -1.2 | 1.8E-07 | -1.1 | 0.46 |
| PDCD2    | -1.2 | 2.4E-07 | -1.0 | 4.5E-06 | -1.1 | 0.46 |
| HOXD8    | -1.0 | 2.0E-04 | -1.3 | 2.0E-06 | -1.1 | 0.46 |
| SLC10A3  | -1.3 | 1.8E-07 | -0.9 | 3.6E-05 | -1.1 | 0.46 |
| DCTN3    | -1.2 | 4.2E-07 | -1.1 | 2.6E-06 | -1.1 | 0.46 |
| STIM1    | -1.1 | 2.0E-06 | -1.1 | 3.2E-06 | -1.1 | 0.46 |
| OLFML3   | -1.2 | 2.9E-07 | -1.0 | 3.3E-06 | -1.1 | 0.46 |
| GPR160   | -1.1 | 1.6E-06 | -1.1 | 7.5E-07 | -1.1 | 0.46 |
| PPIB     | -1.1 | 1.8E-06 | -1.2 | 5.2E-07 | -1.1 | 0.46 |
| CDC42EP4 | -1.1 | 4.4E-06 | -1.2 | 4.0E-07 | -1.1 | 0.46 |
| TMBIM4   | -1.3 | 9.2E-08 | -1.0 | 8.8E-06 | -1.1 | 0.46 |
| UCHL3    | -1.1 | 7.6E-07 | -1.1 | 1.2E-06 | -1.1 | 0.46 |
| TLR1     | -1.1 | 1.9E-05 | -1.2 | 1.2E-06 | -1.1 | 0.46 |
| PRPF6    | -1.2 | 3.3E-07 | -1.1 | 2.4E-06 | -1.1 | 0.46 |
| RBKS     | -1.0 | 1.9E-05 | -1.2 | 2.8E-07 | -1.1 | 0.46 |
| SLC7A9   | -1.3 | 1.1E-05 | -0.9 | 5.0E-04 | -1.1 | 0.46 |
| CHEK2    | -1.1 | 8.9E-07 | -1.1 | 9.3E-07 | -1.1 | 0.46 |
| OAT      | -1.3 | 5.5E-08 | -1.0 | 1.3E-05 | -1.1 | 0.46 |
| NOD1     | -1.1 | 4.3E-06 | -1.2 | 9.8E-07 | -1.1 | 0.46 |
| CRTC3    | -1.2 | 8.9E-07 | -1.1 | 3.5E-06 | -1.1 | 0.46 |
| MVP      | -1.2 | 1.4E-07 | -1.0 | 4.9E-06 | -1.1 | 0.46 |
| ESM1     | -1.3 | 1.1E-07 | -1.0 | 1.5E-05 | -1.1 | 0.46 |
| GCA      | -1.2 | 2.8E-07 | -1.1 | 3.3E-06 | -1.1 | 0.46 |
| DHX32    | -1.1 | 1.2E-06 | -1.1 | 7.8E-07 | -1.1 | 0.46 |
| MRPL20   | -1.1 | 1.6E-06 | -1.2 | 4.1E-07 | -1.1 | 0.46 |
| AKR7A3   | -1.0 | 6.5E-06 | -1.2 | 1.2E-07 | -1.1 | 0.46 |
| ZNF273   | -1.3 | 1.3E-05 | -1.0 | 2.2E-04 | -1.1 | 0.46 |
| KRT10    | -1.2 | 1.9E-07 | -1.0 | 3.4E-06 | -1.1 | 0.46 |
| ACBD5    | -1.3 | 1.4E-07 | -1.0 | 8.6E-06 | -1.1 | 0.46 |
| HTATIP2  | -1.0 | 3.6E-06 | -1.2 | 1.7E-07 | -1.1 | 0.46 |
| STK39    | -1.1 | 1.6E-06 | -1.2 | 4.5E-07 | -1.1 | 0.46 |
| SNX27    | -1.3 | 8.6E-08 | -1.0 | 9.6E-06 | -1.1 | 0.46 |
| CNP      | -1.1 | 6.8E-07 | -1.1 | 8.5E-07 | -1.1 | 0.46 |
| KRT18    | -1.3 | 2.2E-08 | -0.9 | 2.4E-05 | -1.1 | 0.46 |
| MYC      | -0.9 | 2.7E-05 | -1.3 | 1.9E-08 | -1.1 | 0.46 |
| KIF13B   | -1.2 | 1.4E-07 | -1.0 | 4.2E-06 | -1.1 | 0.46 |
| C11orf9  | -1.4 | 1.7E-08 | -0.9 | 3.5E-05 | -1.1 | 0.46 |

|          |      |         |      |         |      |      |
|----------|------|---------|------|---------|------|------|
| IMPA2    | -1.2 | 1.4E-07 | -1.0 | 3.8E-06 | -1.1 | 0.46 |
| CD24     | -1.1 | 4.5E-06 | -1.2 | 2.2E-07 | -1.1 | 0.46 |
| IGFBP7   | -1.2 | 5.2E-07 | -1.1 | 1.0E-06 | -1.1 | 0.46 |
| SSR4     | -1.0 | 4.3E-06 | -1.2 | 1.2E-07 | -1.1 | 0.46 |
| GFER     | -1.2 | 3.4E-07 | -1.1 | 2.2E-06 | -1.1 | 0.46 |
| PGPEP1   | -1.4 | 1.8E-08 | -0.9 | 5.1E-05 | -1.1 | 0.46 |
| EIF4G1   | -1.2 | 1.8E-07 | -1.1 | 2.8E-06 | -1.1 | 0.45 |
| FICD     | -1.1 | 4.2E-06 | -1.1 | 2.7E-06 | -1.1 | 0.45 |
| CCNL2    | -1.0 | 8.4E-06 | -1.3 | 8.0E-08 | -1.1 | 0.45 |
| PTPRO    | -1.2 | 1.2E-06 | -1.0 | 7.8E-06 | -1.1 | 0.45 |
| CYB5A    | -1.0 | 7.0E-06 | -1.3 | 6.5E-08 | -1.1 | 0.45 |
| TTC39B   | -0.9 | 5.0E-04 | -1.4 | 1.0E-07 | -1.1 | 0.45 |
| EDN1     | -1.1 | 3.0E-06 | -1.2 | 1.6E-07 | -1.1 | 0.45 |
| CENPM    | -1.3 | 8.4E-08 | -1.0 | 5.2E-06 | -1.1 | 0.45 |
| NDUFS7   | -1.2 | 3.5E-07 | -1.1 | 1.7E-06 | -1.1 | 0.45 |
| UTP23    | -1.2 | 2.2E-07 | -1.1 | 2.9E-06 | -1.1 | 0.45 |
| ERO1LB   | -1.1 | 1.4E-05 | -1.1 | 5.4E-06 | -1.1 | 0.45 |
| KLK5     | -1.4 | 1.9E-08 | -0.9 | 4.6E-05 | -1.1 | 0.45 |
| CIB1     | -1.1 | 1.2E-06 | -1.2 | 3.5E-07 | -1.1 | 0.45 |
| TBC1D2B  | -1.2 | 1.4E-07 | -1.1 | 3.0E-06 | -1.1 | 0.45 |
| SPARC    | -1.2 | 3.3E-07 | -1.1 | 1.2E-06 | -1.1 | 0.45 |
| PABPC1   | -1.3 | 4.9E-08 | -1.0 | 7.8E-06 | -1.1 | 0.45 |
| PABPC3   | -1.3 | 4.9E-08 | -1.0 | 7.8E-06 | -1.1 | 0.45 |
| CASP4    | -1.1 | 1.0E-06 | -1.2 | 3.8E-07 | -1.1 | 0.45 |
| HLA-DQB1 | -1.2 | 3.7E-07 | -1.1 | 1.1E-06 | -1.1 | 0.45 |
| C11orf1  | -1.0 | 7.0E-06 | -1.2 | 1.5E-07 | -1.1 | 0.45 |
| LANCL2   | -1.1 | 5.4E-05 | -1.2 | 3.3E-05 | -1.1 | 0.45 |
| PPP3CA   | -1.1 | 2.1E-06 | -1.2 | 1.8E-07 | -1.1 | 0.45 |
| FAM82A1  | -1.2 | 1.5E-06 | -1.1 | 3.6E-06 | -1.1 | 0.45 |
| NFE2L3   | -1.2 | 3.4E-07 | -1.1 | 1.1E-06 | -1.1 | 0.45 |
| TRA@     | -0.9 | 8.2E-05 | -1.3 | 2.3E-08 | -1.1 | 0.45 |
| SLC39A5  | -1.4 | 1.1E-07 | -0.9 | 1.9E-04 | -1.1 | 0.45 |
| SLC37A1  | -1.1 | 1.2E-06 | -1.2 | 4.6E-07 | -1.1 | 0.45 |
| LARGE    | -1.1 | 3.0E-06 | -1.2 | 1.3E-07 | -1.1 | 0.45 |
| HOXA4    | -1.1 | 2.6E-06 | -1.2 | 3.1E-07 | -1.1 | 0.45 |
| SIT1     | -1.0 | 1.4E-05 | -1.3 | 1.2E-07 | -1.1 | 0.45 |
| SNTB1    | -1.1 | 5.0E-06 | -1.2 | 7.4E-07 | -1.1 | 0.45 |
| RNASE4   | -1.3 | 6.5E-08 | -1.0 | 4.7E-06 | -1.1 | 0.45 |
| ETNK1    | -1.2 | 2.2E-06 | -1.1 | 2.0E-06 | -1.1 | 0.45 |
| PEPD     | -1.1 | 5.7E-07 | -1.2 | 5.2E-07 | -1.2 | 0.45 |
| ALG14    | -1.1 | 1.4E-06 | -1.2 | 4.8E-07 | -1.2 | 0.45 |
| MTX1     | -1.3 | 6.5E-08 | -1.0 | 5.1E-06 | -1.2 | 0.45 |
| ACE2     | -1.3 | 1.1E-06 | -1.0 | 2.7E-05 | -1.2 | 0.45 |
| BRP44    | -1.1 | 1.1E-06 | -1.2 | 2.4E-07 | -1.2 | 0.45 |
| HPS3     | -1.2 | 4.7E-07 | -1.1 | 2.2E-06 | -1.2 | 0.45 |
| LIMS2    | -1.1 | 6.4E-07 | -1.2 | 3.9E-07 | -1.2 | 0.45 |
| HIST1H4C | -1.3 | 2.2E-08 | -1.0 | 1.1E-05 | -1.2 | 0.45 |
| CABLES1  | -1.1 | 1.6E-06 | -1.2 | 1.6E-07 | -1.2 | 0.45 |
| FNDC5    | -1.2 | 5.6E-06 | -1.1 | 1.1E-05 | -1.2 | 0.45 |
| MBD6     | -1.2 | 4.9E-05 | -1.1 | 4.1E-05 | -1.2 | 0.45 |
| NSFL1C   | -1.2 | 6.9E-07 | -1.1 | 7.7E-07 | -1.2 | 0.45 |
| ZAK      | -1.1 | 1.2E-06 | -1.2 | 1.9E-07 | -1.2 | 0.45 |
| SDC1     | -1.1 | 1.3E-06 | -1.2 | 1.7E-07 | -1.2 | 0.45 |
| PTGS1    | -1.2 | 1.3E-04 | -1.1 | 2.2E-04 | -1.2 | 0.45 |
| RASAL2   | -1.1 | 1.3E-05 | -1.3 | 1.9E-07 | -1.2 | 0.45 |
| ACADS    | -1.2 | 1.1E-06 | -1.2 | 1.0E-06 | -1.2 | 0.45 |
| CCNH     | -1.1 | 7.2E-07 | -1.2 | 3.1E-07 | -1.2 | 0.45 |
| STRN3    | -1.1 | 1.4E-05 | -1.2 | 4.4E-07 | -1.2 | 0.45 |
| PBK      | -1.1 | 3.6E-06 | -1.3 | 7.5E-08 | -1.2 | 0.45 |
| SPSB2    | -1.0 | 8.4E-06 | -1.3 | 2.7E-08 | -1.2 | 0.45 |
| IL34     | -1.1 | 9.8E-07 | -1.2 | 3.4E-07 | -1.2 | 0.45 |
| CYB5R2   | -1.2 | 4.5E-07 | -1.2 | 4.3E-07 | -1.2 | 0.45 |

|          |      |         |      |         |      |      |
|----------|------|---------|------|---------|------|------|
| PLAGL1   | -1.2 | 4.9E-07 | -1.2 | 4.1E-07 | -1.2 | 0.45 |
| ZFPL1    | -1.3 | 1.6E-06 | -1.0 | 5.8E-05 | -1.2 | 0.45 |
| FUT4     | -1.1 | 8.9E-07 | -1.2 | 3.7E-07 | -1.2 | 0.45 |
| MIIP     | -1.3 | 1.6E-07 | -1.0 | 1.6E-05 | -1.2 | 0.45 |
| TUBGCP5  | -1.3 | 3.8E-06 | -1.0 | 3.9E-05 | -1.2 | 0.45 |
| UEVLD    | -1.3 | 1.6E-05 | -1.1 | 9.8E-05 | -1.2 | 0.45 |
| CDKN2C   | -1.3 | 6.6E-08 | -1.1 | 2.5E-06 | -1.2 | 0.45 |
| PLSCR4   | -1.0 | 7.8E-06 | -1.3 | 2.2E-08 | -1.2 | 0.45 |
| IGFBP6   | -1.0 | 8.2E-06 | -1.3 | 3.6E-08 | -1.2 | 0.45 |
| BICC1    | -1.3 | 4.1E-06 | -1.0 | 7.4E-05 | -1.2 | 0.44 |
| PPCDC    | -1.1 | 3.3E-06 | -1.3 | 5.4E-08 | -1.2 | 0.44 |
| PLEKHM1  | -1.1 | 2.1E-06 | -1.3 | 7.0E-08 | -1.2 | 0.44 |
| CTGF     | -1.3 | 3.6E-08 | -1.0 | 4.1E-06 | -1.2 | 0.44 |
| ANKRD16  | -1.2 | 4.4E-07 | -1.1 | 9.2E-07 | -1.2 | 0.44 |
| VANGL1   | -1.3 | 3.4E-08 | -1.0 | 6.4E-06 | -1.2 | 0.44 |
| MED16    | -1.3 | 3.4E-07 | -1.1 | 5.3E-06 | -1.2 | 0.44 |
| APPL2    | -1.1 | 1.6E-06 | -1.2 | 1.7E-07 | -1.2 | 0.44 |
| ANKRD35  | -1.2 | 4.2E-07 | -1.2 | 3.2E-07 | -1.2 | 0.44 |
| C8orf40  | -1.1 | 7.4E-07 | -1.2 | 1.8E-07 | -1.2 | 0.44 |
| F11R     | -1.0 | 1.3E-05 | -1.4 | 9.1E-09 | -1.2 | 0.44 |
| NR2F6    | -1.1 | 2.0E-06 | -1.2 | 3.2E-07 | -1.2 | 0.44 |
| SCARF2   | -1.3 | 9.1E-07 | -1.1 | 1.6E-05 | -1.2 | 0.44 |
| CNPY3    | -1.3 | 8.5E-08 | -1.0 | 8.1E-06 | -1.2 | 0.44 |
| CDKL1    | -1.2 | 5.1E-05 | -1.1 | 1.8E-04 | -1.2 | 0.44 |
| LIPT2    | -1.2 | 2.1E-06 | -1.2 | 9.5E-07 | -1.2 | 0.44 |
| TRIM8    | -1.3 | 6.3E-08 | -1.1 | 1.8E-06 | -1.2 | 0.44 |
| LYL1     | -1.4 | 1.2E-04 | -1.0 | 5.6E-04 | -1.2 | 0.44 |
| TRIP13   | -1.1 | 7.2E-07 | -1.2 | 1.7E-07 | -1.2 | 0.44 |
| CXCR6    | -1.2 | 2.8E-04 | -1.2 | 3.7E-04 | -1.2 | 0.44 |
| CD97     | -1.0 | 6.3E-06 | -1.3 | 1.6E-08 | -1.2 | 0.44 |
| ZNF319   | -1.1 | 6.4E-06 | -1.3 | 9.0E-08 | -1.2 | 0.44 |
| LAYN     | -1.1 | 7.4E-07 | -1.2 | 2.3E-07 | -1.2 | 0.44 |
| HLA-DRB3 | -1.2 | 3.0E-07 | -1.2 | 3.4E-07 | -1.2 | 0.44 |
| CDH3     | -1.4 | 9.8E-09 | -1.0 | 1.0E-05 | -1.2 | 0.44 |
| PTTG1IP  | -1.2 | 2.7E-07 | -1.2 | 3.7E-07 | -1.2 | 0.44 |
| PCGF5    | -1.5 | 9.0E-07 | -0.9 | 4.0E-04 | -1.2 | 0.44 |
| FOSL1    | -1.4 | 5.5E-08 | -0.9 | 3.5E-05 | -1.2 | 0.44 |
| TMTC2    | -1.4 | 1.6E-07 | -1.0 | 1.7E-05 | -1.2 | 0.44 |
| CLEC4G   | -0.9 | 3.7E-04 | -1.5 | 1.7E-08 | -1.2 | 0.44 |
| LDLR     | -1.3 | 1.1E-07 | -1.1 | 2.5E-06 | -1.2 | 0.44 |
| ATOX1    | -1.4 | 4.3E-06 | -1.0 | 1.5E-04 | -1.2 | 0.44 |
| CH25H    | -1.2 | 5.2E-07 | -1.2 | 9.1E-07 | -1.2 | 0.44 |
| INSIG1   | -0.9 | 3.2E-05 | -1.4 | 6.1E-09 | -1.2 | 0.44 |
| UBXN6    | -1.2 | 2.0E-07 | -1.1 | 1.4E-06 | -1.2 | 0.44 |
| SPATA20  | -1.4 | 5.7E-09 | -1.0 | 1.6E-05 | -1.2 | 0.44 |
| GTPBP5   | -1.0 | 6.8E-06 | -1.3 | 3.2E-08 | -1.2 | 0.44 |
| CELA1    | -1.3 | 1.4E-04 | -1.1 | 5.0E-05 | -1.2 | 0.44 |
| HLA-DRB1 | -1.2 | 2.3E-07 | -1.2 | 3.4E-07 | -1.2 | 0.44 |
| HLA-DRB5 | -1.2 | 2.3E-07 | -1.2 | 3.4E-07 | -1.2 | 0.44 |
| MFNG     | -1.1 | 1.1E-06 | -1.3 | 7.0E-08 | -1.2 | 0.44 |
| MNDA     | -1.0 | 4.5E-05 | -1.4 | 3.9E-08 | -1.2 | 0.44 |
| USP5     | -1.3 | 8.6E-07 | -1.1 | 1.9E-05 | -1.2 | 0.44 |
| PHB      | -1.3 | 3.6E-08 | -1.1 | 2.2E-06 | -1.2 | 0.44 |
| RNF128   | -1.1 | 7.2E-07 | -1.2 | 1.0E-07 | -1.2 | 0.44 |
| TFDP1    | -1.2 | 1.5E-07 | -1.2 | 4.4E-07 | -1.2 | 0.44 |
| ZNF185   | -1.2 | 2.6E-07 | -1.2 | 4.7E-07 | -1.2 | 0.44 |
| GGT5     | -1.4 | 4.1E-07 | -1.0 | 9.9E-05 | -1.2 | 0.44 |
| TSTA3    | -1.2 | 4.8E-07 | -1.2 | 2.2E-07 | -1.2 | 0.44 |
| JMJD4    | -1.2 | 1.9E-06 | -1.2 | 3.7E-06 | -1.2 | 0.44 |
| HAT1     | -1.2 | 2.8E-07 | -1.2 | 2.1E-07 | -1.2 | 0.44 |
| IL17RB   | -1.3 | 2.5E-04 | -1.0 | 4.5E-04 | -1.2 | 0.44 |
| WIBG     | -1.2 | 2.0E-07 | -1.2 | 2.9E-07 | -1.2 | 0.44 |

|           |      |         |      |         |      |      |
|-----------|------|---------|------|---------|------|------|
| ARHGEF5   | -1.3 | 2.9E-08 | -1.1 | 2.2E-06 | -1.2 | 0.44 |
| HORMAD1   | -1.2 | 1.6E-06 | -1.2 | 4.3E-07 | -1.2 | 0.44 |
| MYO18A    | -1.3 | 9.8E-08 | -1.1 | 2.7E-06 | -1.2 | 0.44 |
| TIAF1     | -1.3 | 9.8E-08 | -1.1 | 2.7E-06 | -1.2 | 0.44 |
| TMED10    | -1.1 | 2.2E-06 | -1.3 | 2.3E-08 | -1.2 | 0.44 |
| PRKAR2B   | -1.1 | 7.6E-07 | -1.3 | 1.1E-07 | -1.2 | 0.44 |
| COMMD4    | -1.0 | 1.7E-05 | -1.4 | 7.0E-09 | -1.2 | 0.44 |
| TNFRSF10A | -1.1 | 8.7E-06 | -1.3 | 3.1E-07 | -1.2 | 0.44 |
| RRP1B     | -1.2 | 1.7E-06 | -1.2 | 1.4E-06 | -1.2 | 0.44 |
| ATP1A1OS  | -1.1 | 4.9E-05 | -1.3 | 2.0E-06 | -1.2 | 0.43 |
| ABCC2     | -1.3 | 2.0E-05 | -1.1 | 9.5E-05 | -1.2 | 0.43 |
| CCNB2     | -1.2 | 3.0E-07 | -1.2 | 1.7E-07 | -1.2 | 0.43 |
| TPM4      | -1.2 | 1.2E-07 | -1.2 | 4.3E-07 | -1.2 | 0.43 |
| IFT52     | -1.1 | 1.2E-04 | -1.3 | 2.0E-06 | -1.2 | 0.43 |
| RAB32     | -1.2 | 1.9E-07 | -1.2 | 2.6E-07 | -1.2 | 0.43 |
| KIAA0101  | -1.3 | 2.8E-08 | -1.1 | 1.8E-06 | -1.2 | 0.43 |
| SYTL2     | -1.2 | 2.9E-07 | -1.2 | 2.4E-07 | -1.2 | 0.43 |
| KIF18A    | -1.2 | 2.6E-06 | -1.2 | 3.4E-07 | -1.2 | 0.43 |
| TFB1M     | -1.2 | 2.4E-07 | -1.2 | 2.3E-07 | -1.2 | 0.43 |
| RPRM      | -1.2 | 1.0E-06 | -1.2 | 4.7E-07 | -1.2 | 0.43 |
| CRTAP     | -1.1 | 1.2E-06 | -1.3 | 4.8E-08 | -1.2 | 0.43 |
| PLEKHG3   | -1.3 | 4.4E-08 | -1.1 | 9.0E-07 | -1.2 | 0.43 |
| CENPJ     | -1.3 | 3.0E-04 | -1.2 | 5.0E-04 | -1.2 | 0.43 |
| GALE      | -1.2 | 2.8E-07 | -1.2 | 1.4E-07 | -1.2 | 0.43 |
| ZBTB7B    | -1.2 | 5.1E-05 | -1.2 | 1.0E-05 | -1.2 | 0.43 |
| COASY     | -1.1 | 5.9E-07 | -1.3 | 6.0E-08 | -1.2 | 0.43 |
| C11orf2   | -1.4 | 1.4E-08 | -1.1 | 2.5E-06 | -1.2 | 0.43 |
| PMP22     | -1.2 | 4.9E-07 | -1.3 | 7.1E-08 | -1.2 | 0.43 |
| IL17RC    | -1.3 | 2.9E-08 | -1.1 | 1.3E-06 | -1.2 | 0.43 |
| TTC30B    | -1.2 | 1.0E-05 | -1.2 | 6.5E-06 | -1.2 | 0.43 |
| CBLL1     | -1.2 | 2.1E-06 | -1.2 | 2.9E-07 | -1.2 | 0.43 |
| NKAPL     | -1.2 | 4.0E-06 | -1.2 | 4.0E-07 | -1.2 | 0.43 |
| TMPRSS4   | -1.3 | 4.7E-08 | -1.1 | 7.1E-07 | -1.2 | 0.43 |
| CCDC8     | -1.2 | 1.4E-07 | -1.2 | 2.7E-07 | -1.2 | 0.43 |
| CXXC5     | -1.3 | 2.8E-08 | -1.1 | 1.4E-06 | -1.2 | 0.43 |
| LRP11     | -1.1 | 1.3E-06 | -1.3 | 2.9E-08 | -1.2 | 0.43 |
| BAALC     | -1.3 | 7.2E-05 | -1.2 | 5.7E-05 | -1.2 | 0.43 |
| DVL1      | -1.4 | 5.7E-07 | -1.0 | 3.1E-05 | -1.2 | 0.43 |
| WFS1      | -1.5 | 1.7E-09 | -0.9 | 2.0E-05 | -1.2 | 0.43 |
| SLC2A8    | -1.3 | 9.0E-08 | -1.2 | 3.4E-07 | -1.2 | 0.43 |
| NUBP1     | -1.3 | 6.5E-08 | -1.1 | 8.1E-07 | -1.2 | 0.43 |
| SLC35F5   | -1.1 | 6.3E-04 | -1.4 | 5.5E-06 | -1.2 | 0.43 |
| CDK2AP2   | -1.3 | 2.9E-08 | -1.1 | 1.8E-06 | -1.2 | 0.43 |
| DACT1     | -1.1 | 2.6E-06 | -1.4 | 1.3E-08 | -1.2 | 0.43 |
| DIAPH2    | -1.0 | 8.0E-06 | -1.4 | 1.5E-08 | -1.2 | 0.43 |
| SGCA      | -1.2 | 1.1E-06 | -1.3 | 8.8E-08 | -1.2 | 0.43 |
| C22orf28  | -1.2 | 2.6E-07 | -1.2 | 1.1E-07 | -1.2 | 0.43 |
| AGPAT2    | -1.1 | 2.2E-06 | -1.4 | 1.2E-08 | -1.2 | 0.43 |
| TMEM62    | -1.3 | 1.6E-07 | -1.1 | 4.5E-06 | -1.2 | 0.43 |
| EXOSC5    | -1.1 | 2.3E-05 | -1.3 | 2.0E-07 | -1.2 | 0.43 |
| ZMIZ1     | -1.4 | 1.5E-08 | -1.1 | 1.7E-06 | -1.2 | 0.43 |
| UBE2C     | -1.6 | 1.1E-09 | -0.9 | 5.5E-05 | -1.2 | 0.43 |
| NEDD9     | -1.2 | 3.4E-06 | -1.3 | 3.0E-07 | -1.2 | 0.43 |
| GAB2      | -1.3 | 1.8E-08 | -1.1 | 1.6E-06 | -1.2 | 0.43 |
| GHDC      | -1.3 | 8.3E-08 | -1.1 | 1.3E-06 | -1.2 | 0.43 |
| ST3GAL4   | -1.2 | 1.4E-07 | -1.2 | 1.6E-07 | -1.2 | 0.43 |
| SHROOM2   | -1.3 | 5.2E-07 | -1.1 | 2.6E-06 | -1.2 | 0.43 |
| BDH1      | -1.3 | 2.9E-07 | -1.2 | 1.4E-06 | -1.2 | 0.43 |
| HIC1      | -1.1 | 2.0E-06 | -1.3 | 9.4E-08 | -1.2 | 0.43 |
| NBL1      | -1.0 | 3.9E-06 | -1.4 | 5.6E-09 | -1.2 | 0.43 |
| SERHL     | -1.2 | 3.0E-07 | -1.2 | 1.9E-07 | -1.2 | 0.43 |
| MCM3      | -1.3 | 2.9E-08 | -1.1 | 6.2E-07 | -1.2 | 0.43 |

|          |      |         |      |         |      |      |
|----------|------|---------|------|---------|------|------|
| TENC1    | -1.4 | 2.8E-08 | -1.1 | 4.5E-06 | -1.2 | 0.43 |
| CEBPD    | -1.5 | 2.6E-09 | -1.0 | 6.4E-06 | -1.2 | 0.43 |
| SMARCD2  | -1.3 | 4.0E-08 | -1.1 | 9.0E-07 | -1.2 | 0.43 |
| ATAD2    | -1.3 | 4.9E-08 | -1.1 | 1.3E-06 | -1.2 | 0.43 |
| RGNEF    | -1.3 | 9.8E-08 | -1.2 | 2.0E-07 | -1.2 | 0.43 |
| ENOX2    | -1.3 | 5.9E-08 | -1.2 | 6.9E-07 | -1.2 | 0.43 |
| GBP5     | -1.3 | 1.4E-07 | -1.2 | 6.8E-07 | -1.2 | 0.43 |
| NFE2L2   | -1.3 | 3.1E-08 | -1.2 | 4.6E-07 | -1.2 | 0.42 |
| MYO1B    | -1.2 | 1.8E-05 | -1.3 | 8.5E-06 | -1.2 | 0.42 |
| PLXNA2   | -1.1 | 2.5E-06 | -1.4 | 2.0E-08 | -1.2 | 0.42 |
| ARL6IP4  | -1.2 | 4.2E-07 | -1.3 | 3.1E-08 | -1.2 | 0.42 |
| SOBP     | -1.1 | 1.1E-06 | -1.4 | 1.2E-08 | -1.2 | 0.42 |
| GUCY1A3  | -1.1 | 1.5E-06 | -1.4 | 9.8E-09 | -1.2 | 0.42 |
| RSPH3    | -1.4 | 5.4E-09 | -1.1 | 3.2E-06 | -1.2 | 0.42 |
| COL6A1   | -1.3 | 6.1E-08 | -1.2 | 2.0E-07 | -1.2 | 0.42 |
| C13orf34 | -1.1 | 1.1E-06 | -1.3 | 2.5E-08 | -1.2 | 0.42 |
| HERPUD1  | -1.1 | 1.5E-06 | -1.4 | 7.7E-09 | -1.2 | 0.42 |
| C1QTNF5  | -1.4 | 8.2E-08 | -1.1 | 2.1E-06 | -1.2 | 0.42 |
| C2orf28  | -1.3 | 3.0E-08 | -1.2 | 3.6E-07 | -1.2 | 0.42 |
| C9orf9   | -1.2 | 3.0E-07 | -1.2 | 2.6E-07 | -1.2 | 0.42 |
| C1QTNF2  | -1.3 | 9.3E-07 | -1.2 | 5.2E-07 | -1.2 | 0.42 |
| GJC2     | -1.4 | 6.4E-09 | -1.1 | 2.6E-06 | -1.2 | 0.42 |
| EPB41L2  | -1.1 | 1.2E-04 | -1.4 | 6.3E-06 | -1.2 | 0.42 |
| TRPV2    | -1.2 | 3.3E-07 | -1.3 | 2.8E-08 | -1.2 | 0.42 |
| FRMD5    | -1.0 | 2.8E-05 | -1.5 | 3.3E-09 | -1.2 | 0.42 |
| S100A12  | -1.1 | 1.3E-05 | -1.4 | 8.3E-08 | -1.2 | 0.42 |
| MAST4    | -1.3 | 2.4E-08 | -1.2 | 4.2E-07 | -1.3 | 0.42 |
| AIRE     | -1.6 | 2.0E-08 | -0.9 | 9.9E-05 | -1.3 | 0.42 |
| NCAPD2   | -1.5 | 3.1E-09 | -1.1 | 3.5E-06 | -1.3 | 0.42 |
| ANGPTL2  | -1.3 | 7.0E-08 | -1.2 | 1.2E-07 | -1.3 | 0.42 |
| ADAD2    | -1.5 | 9.8E-07 | -1.0 | 1.3E-04 | -1.3 | 0.42 |
| CLIC6    | -1.1 | 2.0E-06 | -1.4 | 6.2E-09 | -1.3 | 0.42 |
| AIM1L    | -1.3 | 2.7E-08 | -1.2 | 3.0E-07 | -1.3 | 0.42 |
| GGCT     | -1.3 | 3.5E-08 | -1.2 | 2.2E-07 | -1.3 | 0.42 |
| RCAN2    | -1.7 | 4.0E-08 | -0.8 | 5.3E-04 | -1.3 | 0.42 |
| CYTH4    | -1.2 | 3.9E-07 | -1.3 | 9.1E-08 | -1.3 | 0.42 |
| IFI27L2  | -1.3 | 3.3E-08 | -1.2 | 2.2E-07 | -1.3 | 0.42 |
| PIWIL4   | -1.1 | 1.1E-06 | -1.4 | 1.3E-08 | -1.3 | 0.42 |
| RTDR1    | -1.3 | 2.2E-07 | -1.2 | 3.5E-07 | -1.3 | 0.42 |
| CBARA1   | -1.2 | 6.4E-07 | -1.3 | 2.2E-08 | -1.3 | 0.42 |
| MYBL2    | -1.1 | 8.6E-07 | -1.4 | 6.8E-09 | -1.3 | 0.42 |
| CRY2     | -1.3 | 8.1E-08 | -1.3 | 7.1E-08 | -1.3 | 0.42 |
| SV2B     | -1.3 | 2.1E-06 | -1.2 | 9.9E-07 | -1.3 | 0.42 |
| SERPING1 | -1.3 | 1.7E-08 | -1.2 | 3.1E-07 | -1.3 | 0.42 |
| SULF2    | -1.4 | 7.1E-09 | -1.1 | 7.2E-07 | -1.3 | 0.42 |
| SUMO3    | -1.3 | 2.8E-08 | -1.2 | 1.8E-07 | -1.3 | 0.42 |
| CASP7    | -1.1 | 1.1E-06 | -1.4 | 4.8E-09 | -1.3 | 0.42 |
| DUSP5    | -1.4 | 1.0E-08 | -1.2 | 4.9E-07 | -1.3 | 0.42 |
| TMEM45A  | -1.2 | 3.0E-07 | -1.3 | 2.0E-08 | -1.3 | 0.42 |
| IDS      | -1.1 | 1.3E-06 | -1.4 | 7.1E-09 | -1.3 | 0.42 |
| GORASP2  | -1.4 | 3.3E-09 | -1.1 | 1.5E-06 | -1.3 | 0.42 |
| MCM5     | -1.4 | 6.7E-09 | -1.1 | 8.0E-07 | -1.3 | 0.42 |
| CLCN2    | -1.3 | 7.4E-07 | -1.3 | 5.7E-07 | -1.3 | 0.42 |
| FAM129A  | -1.0 | 1.3E-05 | -1.5 | 2.5E-09 | -1.3 | 0.42 |
| RGS16    | -1.3 | 6.3E-07 | -1.3 | 9.0E-08 | -1.3 | 0.42 |
| HPDL     | -1.4 | 1.5E-08 | -1.1 | 1.1E-06 | -1.3 | 0.41 |
| P2RX7    | -1.3 | 1.4E-06 | -1.3 | 1.5E-06 | -1.3 | 0.41 |
| TFPI2    | -1.2 | 4.0E-07 | -1.3 | 4.2E-08 | -1.3 | 0.41 |
| AURKA    | -1.2 | 3.2E-07 | -1.3 | 2.2E-08 | -1.3 | 0.41 |
| CRLS1    | -1.1 | 1.3E-06 | -1.4 | 4.0E-09 | -1.3 | 0.41 |
| MTAP     | -1.2 | 3.3E-07 | -1.3 | 3.8E-08 | -1.3 | 0.41 |
| NAP1L5   | -1.5 | 2.0E-09 | -1.0 | 7.3E-06 | -1.3 | 0.41 |

|          |      |         |      |         |      |      |
|----------|------|---------|------|---------|------|------|
| LYN      | -1.3 | 6.6E-08 | -1.3 | 1.0E-07 | -1.3 | 0.41 |
| PIK3R1   | -1.1 | 3.1E-04 | -1.4 | 2.1E-06 | -1.3 | 0.41 |
| CCDC90A  | -1.3 | 3.9E-08 | -1.2 | 1.8E-07 | -1.3 | 0.41 |
| TACSTD2  | -1.2 | 2.0E-07 | -1.3 | 1.7E-08 | -1.3 | 0.41 |
| SCIN     | -1.2 | 1.2E-06 | -1.3 | 1.0E-07 | -1.3 | 0.41 |
| HEBP2    | -1.2 | 3.6E-07 | -1.4 | 9.4E-09 | -1.3 | 0.41 |
| TRIM10   | -1.6 | 1.0E-07 | -1.0 | 5.6E-05 | -1.3 | 0.41 |
| BRE      | -1.4 | 5.3E-08 | -1.2 | 5.4E-07 | -1.3 | 0.41 |
| CRISPLD1 | -1.4 | 3.8E-07 | -1.2 | 2.4E-06 | -1.3 | 0.41 |
| CPSF3L   | -1.5 | 3.3E-09 | -1.1 | 2.7E-06 | -1.3 | 0.41 |
| C5orf23  | -1.4 | 1.6E-08 | -1.2 | 4.3E-07 | -1.3 | 0.41 |
| YPEL4    | -1.3 | 5.0E-08 | -1.3 | 6.2E-08 | -1.3 | 0.41 |
| ROBO4    | -1.1 | 4.1E-06 | -1.5 | 1.2E-09 | -1.3 | 0.41 |
| IGLV2-23 | -1.7 | 1.1E-10 | -0.9 | 4.3E-05 | -1.3 | 0.41 |
| DOK5     | -1.3 | 4.7E-06 | -1.3 | 4.5E-07 | -1.3 | 0.41 |
| DNTTIP1  | -1.3 | 4.5E-08 | -1.3 | 6.0E-08 | -1.3 | 0.41 |
| LMBRD1   | -1.2 | 1.8E-07 | -1.4 | 1.5E-08 | -1.3 | 0.41 |
| FRMD4    | -1.4 | 2.1E-07 | -1.2 | 3.0E-06 | -1.3 | 0.41 |
| TC2N     | -1.3 | 1.7E-06 | -1.3 | 4.5E-07 | -1.3 | 0.41 |
| RPL10    | -1.3 | 2.0E-08 | -1.2 | 1.3E-07 | -1.3 | 0.41 |
| BLOC1S1  | -1.3 | 6.8E-08 | -1.3 | 3.7E-08 | -1.3 | 0.41 |
| SSNA1    | -1.2 | 2.0E-07 | -1.4 | 1.4E-08 | -1.3 | 0.41 |
| C13orf1  | -1.3 | 3.4E-06 | -1.3 | 4.1E-07 | -1.3 | 0.41 |
| GPER     | -1.2 | 3.0E-07 | -1.4 | 1.4E-08 | -1.3 | 0.41 |
| ZNF765   | -1.2 | 4.7E-04 | -1.4 | 7.5E-06 | -1.3 | 0.41 |
| PTGES2   | -1.2 | 1.3E-07 | -1.3 | 1.8E-08 | -1.3 | 0.41 |
| SLCO3A1  | -1.4 | 1.3E-08 | -1.1 | 1.7E-06 | -1.3 | 0.41 |
| PHF15    | -1.3 | 1.7E-07 | -1.2 | 5.2E-07 | -1.3 | 0.41 |
| ZBED3    | -1.4 | 1.2E-08 | -1.2 | 1.9E-07 | -1.3 | 0.41 |
| TCN2     | -1.3 | 1.4E-07 | -1.3 | 4.6E-08 | -1.3 | 0.41 |
| KIF26B   | -1.3 | 3.2E-06 | -1.2 | 4.1E-06 | -1.3 | 0.41 |
| MRPL23   | -1.2 | 1.3E-07 | -1.3 | 1.6E-08 | -1.3 | 0.41 |
| ARHGAP25 | -1.3 | 3.2E-08 | -1.3 | 9.1E-08 | -1.3 | 0.41 |
| CAMK2N1  | -1.5 | 8.8E-10 | -1.1 | 2.4E-06 | -1.3 | 0.41 |
| AVPI1    | -1.5 | 1.5E-09 | -1.1 | 1.4E-06 | -1.3 | 0.41 |
| PHF14    | -1.5 | 5.8E-06 | -1.1 | 2.5E-04 | -1.3 | 0.41 |
| NRGN     | -1.5 | 2.6E-07 | -1.1 | 3.3E-05 | -1.3 | 0.41 |
| SVIL     | -1.3 | 6.3E-08 | -1.3 | 3.2E-08 | -1.3 | 0.41 |
| P2RX4    | -1.4 | 8.8E-09 | -1.2 | 7.3E-07 | -1.3 | 0.41 |
| MANSC1   | -1.4 | 2.0E-08 | -1.2 | 3.4E-07 | -1.3 | 0.41 |
| TCN1     | -1.2 | 4.9E-05 | -1.4 | 3.3E-07 | -1.3 | 0.41 |
| VWA1     | -1.6 | 2.1E-10 | -1.0 | 9.4E-06 | -1.3 | 0.41 |
| PMEP1A1  | -1.4 | 8.0E-09 | -1.2 | 2.2E-07 | -1.3 | 0.41 |
| SHROOM3  | -1.4 | 5.6E-09 | -1.2 | 3.4E-07 | -1.3 | 0.41 |
| EMP2     | -1.3 | 2.3E-08 | -1.3 | 7.2E-08 | -1.3 | 0.41 |
| PTAFR    | -1.1 | 3.3E-06 | -1.5 | 4.2E-09 | -1.3 | 0.41 |
| PLSCR1   | -1.2 | 1.3E-07 | -1.4 | 1.4E-08 | -1.3 | 0.41 |
| GALNT10  | -1.4 | 2.0E-07 | -1.2 | 3.9E-07 | -1.3 | 0.41 |
| GNB5     | -1.3 | 1.7E-07 | -1.3 | 3.3E-08 | -1.3 | 0.41 |
| TSN      | -1.4 | 8.4E-09 | -1.2 | 2.0E-07 | -1.3 | 0.41 |
| ACADL    | -1.5 | 5.7E-09 | -1.1 | 1.7E-06 | -1.3 | 0.41 |
| HMG5     | -1.5 | 6.3E-08 | -1.1 | 1.1E-05 | -1.3 | 0.41 |
| DTYMK    | -1.2 | 5.1E-07 | -1.4 | 3.1E-09 | -1.3 | 0.41 |
| UQCRCF51 | -1.2 | 9.3E-08 | -1.3 | 1.5E-08 | -1.3 | 0.41 |
| UNC93A   | -1.2 | 3.9E-04 | -1.4 | 1.9E-05 | -1.3 | 0.41 |
| RBM16    | -1.4 | 4.4E-09 | -1.2 | 3.5E-07 | -1.3 | 0.41 |
| OAS3     | -1.4 | 5.2E-09 | -1.2 | 3.4E-07 | -1.3 | 0.41 |
| CCBL2    | -1.3 | 2.6E-07 | -1.3 | 5.0E-08 | -1.3 | 0.41 |
| C7orf23  | -1.4 | 1.0E-08 | -1.2 | 1.4E-07 | -1.3 | 0.41 |
| TMEM149  | -1.3 | 9.3E-08 | -1.4 | 1.4E-08 | -1.3 | 0.40 |
| CLTB     | -1.1 | 4.4E-06 | -1.6 | 1.3E-05 | -1.3 | 0.40 |
| GFPT1    | -1.4 | 2.1E-08 | -1.2 | 2.2E-07 | -1.3 | 0.40 |

|           |      |         |      |         |      |      |
|-----------|------|---------|------|---------|------|------|
| TCF7      | -1.3 | 1.7E-04 | -1.3 | 4.1E-05 | -1.3 | 0.40 |
| CEACAM8   | -1.1 | 4.3E-04 | -1.5 | 7.8E-09 | -1.3 | 0.40 |
| TMCC3     | -1.5 | 1.6E-07 | -1.1 | 3.8E-06 | -1.3 | 0.40 |
| NUAK2     | -1.4 | 8.2E-08 | -1.2 | 2.8E-07 | -1.3 | 0.40 |
| ASB13     | -1.5 | 9.5E-08 | -1.1 | 1.4E-05 | -1.3 | 0.40 |
| CDC42EP2  | -1.3 | 5.4E-08 | -1.3 | 2.3E-08 | -1.3 | 0.40 |
| ANKRD39   | -1.3 | 5.9E-08 | -1.3 | 4.0E-08 | -1.3 | 0.40 |
| ADI1      | -1.3 | 6.1E-08 | -1.3 | 1.6E-08 | -1.3 | 0.40 |
| H3F3B     | -1.4 | 4.4E-09 | -1.2 | 2.2E-07 | -1.3 | 0.40 |
| TREM1     | -1.4 | 1.5E-08 | -1.2 | 5.1E-07 | -1.3 | 0.40 |
| TNFRSF14  | -1.3 | 2.7E-08 | -1.3 | 3.6E-08 | -1.3 | 0.40 |
| TSPYL5    | -1.4 | 3.8E-09 | -1.2 | 2.5E-07 | -1.3 | 0.40 |
| DEPDC1B   | -1.5 | 2.3E-08 | -1.1 | 2.0E-06 | -1.3 | 0.40 |
| TSHZ1     | -1.4 | 5.4E-09 | -1.2 | 1.8E-07 | -1.3 | 0.40 |
| SH2B3     | -1.3 | 7.5E-04 | -1.3 | 8.3E-05 | -1.3 | 0.40 |
| RASGEF1A  | -1.6 | 2.3E-10 | -1.0 | 7.4E-06 | -1.3 | 0.40 |
| FYCO1     | -1.1 | 5.9E-07 | -1.5 | 1.5E-09 | -1.3 | 0.40 |
| ZFP36L1   | -1.4 | 8.7E-09 | -1.3 | 8.7E-08 | -1.3 | 0.40 |
| ZBTB20    | -1.2 | 2.9E-07 | -1.4 | 2.7E-09 | -1.3 | 0.40 |
| DNPEP     | -1.3 | 7.8E-08 | -1.4 | 9.6E-09 | -1.3 | 0.40 |
| LAMA3     | -1.4 | 7.8E-09 | -1.2 | 1.1E-07 | -1.3 | 0.40 |
| TRIM29    | -1.5 | 5.3E-09 | -1.2 | 4.1E-07 | -1.3 | 0.40 |
| POPDC2    | -1.2 | 3.3E-07 | -1.4 | 1.1E-08 | -1.3 | 0.40 |
| RAB11FIP5 | -1.3 | 6.4E-08 | -1.4 | 1.3E-08 | -1.3 | 0.40 |
| TMEM185B  | -1.2 | 1.6E-06 | -1.5 | 3.7E-09 | -1.3 | 0.40 |
| SLC39A4   | -1.4 | 3.6E-09 | -1.2 | 1.8E-07 | -1.3 | 0.40 |
| MYRIP     | -1.3 | 1.6E-07 | -1.4 | 2.5E-08 | -1.3 | 0.40 |
| TYRO3     | -1.4 | 1.1E-08 | -1.3 | 6.1E-08 | -1.3 | 0.40 |
| PKN1      | -1.6 | 1.4E-09 | -1.1 | 8.6E-06 | -1.3 | 0.40 |
| SPAG8     | -1.3 | 1.1E-07 | -1.3 | 8.4E-08 | -1.3 | 0.40 |
| MAT1A     | -1.2 | 8.6E-06 | -1.4 | 6.3E-08 | -1.3 | 0.40 |
| STAG3L4   | -1.2 | 1.6E-04 | -1.4 | 1.2E-05 | -1.3 | 0.40 |
| ISG15     | -1.4 | 5.8E-09 | -1.3 | 9.0E-08 | -1.3 | 0.40 |
| GALNT12   | -1.3 | 1.6E-06 | -1.3 | 4.7E-07 | -1.3 | 0.40 |
| ELN       | -1.6 | 6.6E-09 | -1.1 | 6.3E-06 | -1.3 | 0.40 |
| SHMT2     | -1.3 | 2.8E-08 | -1.3 | 1.9E-08 | -1.3 | 0.40 |
| GRAMD3    | -1.5 | 2.9E-09 | -1.2 | 4.3E-07 | -1.3 | 0.40 |
| ACTN4     | -1.4 | 1.2E-08 | -1.3 | 5.1E-08 | -1.3 | 0.40 |
| GPD2      | -1.6 | 1.2E-08 | -1.1 | 7.1E-06 | -1.3 | 0.40 |
| ATRN      | -1.2 | 6.1E-07 | -1.5 | 2.0E-09 | -1.3 | 0.40 |
| DAP       | -1.4 | 1.2E-08 | -1.3 | 3.8E-08 | -1.3 | 0.40 |
| FAS       | -1.3 | 7.7E-08 | -1.4 | 1.9E-08 | -1.3 | 0.40 |
| SQRDL     | -1.3 | 5.0E-08 | -1.4 | 8.9E-09 | -1.3 | 0.40 |
| ROM1      | -1.3 | 9.1E-08 | -1.4 | 5.5E-09 | -1.3 | 0.40 |
| PTHLH     | -1.1 | 9.5E-06 | -1.5 | 7.0E-09 | -1.3 | 0.40 |
| BNIP3L    | -1.2 | 1.9E-07 | -1.5 | 2.3E-09 | -1.3 | 0.40 |
| CYR61     | -1.3 | 2.4E-08 | -1.3 | 1.8E-08 | -1.3 | 0.40 |
| GADD45B   | -1.4 | 1.3E-08 | -1.3 | 5.5E-08 | -1.3 | 0.40 |
| GSTM2     | -1.3 | 5.7E-07 | -1.4 | 3.2E-08 | -1.3 | 0.40 |
| CYC1      | -1.3 | 5.9E-08 | -1.4 | 7.4E-09 | -1.3 | 0.40 |
| NDRG2     | -1.4 | 3.8E-09 | -1.2 | 1.1E-07 | -1.3 | 0.40 |
| S100B     | -1.5 | 3.2E-09 | -1.1 | 1.4E-06 | -1.3 | 0.40 |
| PLA2G4C   | -1.2 | 2.9E-07 | -1.5 | 2.0E-09 | -1.3 | 0.40 |
| FOXO3     | -1.3 | 5.8E-08 | -1.4 | 6.7E-09 | -1.3 | 0.40 |
| RUNX1     | -1.3 | 1.7E-04 | -1.4 | 3.4E-05 | -1.3 | 0.40 |
| MRS2      | -1.4 | 1.8E-08 | -1.3 | 3.0E-08 | -1.3 | 0.40 |
| NEB       | -1.0 | 4.7E-05 | -1.7 | 1.2E-10 | -1.3 | 0.40 |
| CEBPA     | -1.4 | 2.1E-08 | -1.3 | 2.6E-08 | -1.3 | 0.39 |
| MRVI1     | -1.2 | 2.2E-07 | -1.4 | 3.9E-09 | -1.3 | 0.39 |
| APOC1     | -1.3 | 1.6E-08 | -1.3 | 2.0E-08 | -1.3 | 0.39 |
| TMEM176A  | -1.5 | 9.1E-10 | -1.2 | 3.8E-07 | -1.3 | 0.39 |
| SERPINF1  | -1.4 | 6.1E-09 | -1.3 | 5.3E-08 | -1.3 | 0.39 |

|           |      |         |      |         |      |      |
|-----------|------|---------|------|---------|------|------|
| MPZL1     | -1.2 | 2.1E-07 | -1.5 | 1.6E-09 | -1.3 | 0.39 |
| FAM107B   | -1.3 | 1.9E-08 | -1.3 | 1.7E-08 | -1.3 | 0.39 |
| POU6F1    | -1.2 | 5.5E-07 | -1.5 | 3.9E-09 | -1.3 | 0.39 |
| EHD4      | -1.4 | 6.9E-09 | -1.3 | 5.1E-08 | -1.3 | 0.39 |
| NMNAT3    | -1.5 | 3.0E-08 | -1.2 | 2.4E-06 | -1.3 | 0.39 |
| RBM3      | -1.3 | 3.4E-08 | -1.4 | 8.9E-09 | -1.3 | 0.39 |
| CAMK2G    | -1.1 | 1.7E-04 | -1.6 | 1.4E-07 | -1.3 | 0.39 |
| KLF7      | -1.7 | 7.3E-08 | -1.0 | 3.7E-05 | -1.3 | 0.39 |
| ATP1A3    | -1.4 | 8.9E-09 | -1.3 | 4.0E-08 | -1.3 | 0.39 |
| LPIN1     | -1.3 | 1.7E-08 | -1.3 | 1.9E-08 | -1.3 | 0.39 |
| DAB2IP    | -1.4 | 6.1E-09 | -1.3 | 4.4E-08 | -1.3 | 0.39 |
| MRPS18A   | -1.2 | 1.4E-07 | -1.5 | 2.0E-09 | -1.3 | 0.39 |
| C1orf159  | -1.6 | 3.5E-06 | -1.1 | 2.7E-04 | -1.3 | 0.39 |
| FBXO32    | -1.4 | 7.0E-09 | -1.3 | 5.2E-08 | -1.3 | 0.39 |
| ETS2      | -1.1 | 1.3E-06 | -1.6 | 2.0E-10 | -1.4 | 0.39 |
| NAPA      | -1.4 | 3.9E-07 | -1.3 | 2.8E-06 | -1.4 | 0.39 |
| TGFB111   | -1.5 | 8.1E-08 | -1.2 | 1.5E-06 | -1.4 | 0.39 |
| TMEM99    | -1.4 | 5.5E-09 | -1.3 | 4.2E-08 | -1.4 | 0.39 |
| ARSE      | -1.8 | 9.4E-11 | -0.9 | 8.1E-05 | -1.4 | 0.39 |
| FAM120B   | -1.5 | 2.0E-08 | -1.2 | 1.5E-06 | -1.4 | 0.39 |
| ICAM3     | -1.7 | 4.5E-11 | -1.0 | 1.7E-05 | -1.4 | 0.39 |
| ZCCHC24   | -1.3 | 7.1E-08 | -1.4 | 2.8E-09 | -1.4 | 0.39 |
| PUSL1     | -1.4 | 6.1E-09 | -1.3 | 3.3E-08 | -1.4 | 0.39 |
| MAF1      | -1.3 | 1.1E-07 | -1.4 | 4.5E-08 | -1.4 | 0.39 |
| NBLA00301 | -1.5 | 8.0E-10 | -1.2 | 4.5E-07 | -1.4 | 0.39 |
| HOXD1     | -1.5 | 2.6E-08 | -1.3 | 2.3E-07 | -1.4 | 0.39 |
| CYBRD1    | -1.3 | 6.6E-08 | -1.4 | 2.8E-09 | -1.4 | 0.39 |
| HEXA      | -1.5 | 2.7E-09 | -1.3 | 7.1E-08 | -1.4 | 0.39 |
| C11orf82  | -1.2 | 4.3E-06 | -1.6 | 2.8E-09 | -1.4 | 0.39 |
| C6orf48   | -1.6 | 3.6E-10 | -1.2 | 5.2E-07 | -1.4 | 0.39 |
| C4orf19   | -1.1 | 2.1E-05 | -1.7 | 6.7E-10 | -1.4 | 0.39 |
| GCHFR     | -1.5 | 7.2E-10 | -1.2 | 3.3E-07 | -1.4 | 0.39 |
| DBF4      | -1.3 | 5.3E-08 | -1.4 | 5.7E-09 | -1.4 | 0.39 |
| COX6C     | -1.5 | 1.2E-09 | -1.2 | 1.5E-07 | -1.4 | 0.39 |
| HOXB7     | -1.2 | 1.2E-07 | -1.5 | 1.5E-09 | -1.4 | 0.39 |
| GSTO2     | -1.3 | 1.8E-07 | -1.4 | 8.2E-09 | -1.4 | 0.39 |
| CYB5D2    | -1.4 | 4.7E-09 | -1.3 | 3.5E-08 | -1.4 | 0.39 |
| SLC44A3   | -1.3 | 7.4E-08 | -1.4 | 1.3E-08 | -1.4 | 0.39 |
| GALM      | -1.5 | 2.5E-09 | -1.3 | 1.1E-07 | -1.4 | 0.39 |
| SPOPL     | -1.6 | 8.6E-10 | -1.2 | 6.1E-07 | -1.4 | 0.39 |
| SGK223    | -1.3 | 7.9E-08 | -1.5 | 1.8E-09 | -1.4 | 0.39 |
| EGFLAM    | -1.4 | 8.4E-09 | -1.3 | 1.9E-08 | -1.4 | 0.39 |
| HCLS1     | -1.3 | 2.7E-08 | -1.4 | 5.0E-09 | -1.4 | 0.39 |
| IGLL1     | -1.1 | 9.8E-07 | -1.6 | 2.0E-10 | -1.4 | 0.39 |
| RAPGEF4   | -1.2 | 5.2E-06 | -1.5 | 6.9E-09 | -1.4 | 0.39 |
| C19orf33  | -1.3 | 3.5E-08 | -1.4 | 3.6E-09 | -1.4 | 0.39 |
| BOC       | -1.5 | 7.4E-09 | -1.2 | 4.8E-07 | -1.4 | 0.39 |
| HEG1      | -1.4 | 1.4E-08 | -1.4 | 1.0E-08 | -1.4 | 0.39 |
| TES       | -1.8 | 7.4E-11 | -1.0 | 2.1E-05 | -1.4 | 0.39 |
| RGS2      | -1.5 | 9.4E-10 | -1.2 | 1.3E-07 | -1.4 | 0.39 |
| CHRAC1    | -1.3 | 4.1E-07 | -1.4 | 2.2E-08 | -1.4 | 0.39 |
| TRIP6     | -1.6 | 2.1E-10 | -1.1 | 6.0E-07 | -1.4 | 0.39 |
| CALD1     | -1.4 | 5.2E-09 | -1.3 | 2.2E-08 | -1.4 | 0.39 |
| TCF4      | -1.5 | 1.9E-09 | -1.3 | 5.9E-08 | -1.4 | 0.39 |
| DUS3L     | -1.2 | 1.8E-07 | -1.5 | 1.7E-09 | -1.4 | 0.39 |
| GSN       | -1.3 | 4.0E-08 | -1.5 | 2.6E-09 | -1.4 | 0.39 |
| TCF7L1    | -1.5 | 1.3E-09 | -1.2 | 2.3E-07 | -1.4 | 0.39 |
| IRF1      | -1.6 | 3.1E-09 | -1.1 | 2.0E-06 | -1.4 | 0.39 |
| ZDHHC11   | -1.2 | 1.6E-07 | -1.5 | 6.3E-10 | -1.4 | 0.39 |
| GOLT1A    | -1.3 | 1.9E-08 | -1.4 | 5.8E-09 | -1.4 | 0.39 |
| EAF2      | -1.5 | 1.4E-07 | -1.3 | 3.2E-07 | -1.4 | 0.39 |
| SESN2     | -1.3 | 7.6E-08 | -1.5 | 1.3E-09 | -1.4 | 0.39 |

|                 |      |         |      |         |      |      |
|-----------------|------|---------|------|---------|------|------|
| APOBEC3A        | -1.5 | 3.5E-07 | -1.3 | 3.1E-07 | -1.4 | 0.39 |
| CHST7           | -1.3 | 6.4E-08 | -1.5 | 4.1E-09 | -1.4 | 0.38 |
| CEP55           | -1.2 | 2.6E-07 | -1.5 | 5.6E-10 | -1.4 | 0.38 |
| CSTB            | -1.4 | 3.9E-09 | -1.3 | 2.2E-08 | -1.4 | 0.38 |
| TCEAL7          | -1.3 | 1.1E-07 | -1.5 | 1.0E-09 | -1.4 | 0.38 |
| SIAH2           | -1.4 | 1.8E-08 | -1.3 | 5.3E-08 | -1.4 | 0.38 |
| CCDC109A        | -1.4 | 1.6E-07 | -1.3 | 1.5E-07 | -1.4 | 0.38 |
| NMB             | -1.3 | 1.7E-08 | -1.4 | 4.0E-09 | -1.4 | 0.38 |
| HRCT1           | -1.4 | 2.2E-08 | -1.4 | 1.0E-08 | -1.4 | 0.38 |
| GZMA            | -1.3 | 1.3E-07 | -1.5 | 2.3E-09 | -1.4 | 0.38 |
| C11orf52        | -1.3 | 6.6E-07 | -1.5 | 4.6E-09 | -1.4 | 0.38 |
| BZW2            | -1.5 | 6.5E-10 | -1.2 | 9.8E-08 | -1.4 | 0.38 |
| LOR             | -1.5 | 2.1E-06 | -1.2 | 3.9E-05 | -1.4 | 0.38 |
| TAP1            | -1.5 | 1.5E-09 | -1.3 | 3.9E-08 | -1.4 | 0.38 |
| RNASEH2C        | -1.3 | 5.6E-08 | -1.5 | 1.0E-09 | -1.4 | 0.38 |
| NUBPL           | -1.5 | 9.1E-10 | -1.2 | 1.6E-07 | -1.4 | 0.38 |
| PMM2            | -1.4 | 1.0E-08 | -1.3 | 2.8E-08 | -1.4 | 0.38 |
| GSTM5           | -1.7 | 3.1E-11 | -1.1 | 2.2E-06 | -1.4 | 0.38 |
| GLTSCR2         | -1.3 | 3.4E-08 | -1.5 | 1.6E-09 | -1.4 | 0.38 |
| PDXK            | -1.5 | 1.6E-09 | -1.3 | 3.8E-08 | -1.4 | 0.38 |
| GTF3A           | -1.4 | 5.5E-09 | -1.4 | 9.2E-09 | -1.4 | 0.38 |
| PDZD8           | -1.5 | 5.2E-09 | -1.3 | 1.0E-07 | -1.4 | 0.38 |
| SPEF2           | -0.9 | 2.0E-04 | -1.8 | 8.5E-11 | -1.4 | 0.38 |
| PRPS2           | -1.5 | 2.6E-08 | -1.3 | 3.6E-07 | -1.4 | 0.38 |
| CYB561          | -1.6 | 3.3E-10 | -1.2 | 8.4E-07 | -1.4 | 0.38 |
| C9orf156        | -1.4 | 1.0E-08 | -1.4 | 1.8E-08 | -1.4 | 0.38 |
| CDHR5           | -1.6 | 2.7E-10 | -1.2 | 2.9E-07 | -1.4 | 0.38 |
| ZNF800          | -1.5 | 3.3E-08 | -1.3 | 1.2E-07 | -1.4 | 0.38 |
| C1QTNF9B        | -1.1 | 1.3E-04 | -1.6 | 6.6E-07 | -1.4 | 0.38 |
| SPATA13         | -1.1 | 1.3E-04 | -1.6 | 6.6E-07 | -1.4 | 0.38 |
| CTSZ            | -1.4 | 7.3E-09 | -1.4 | 1.7E-08 | -1.4 | 0.38 |
| GRK5            | -1.4 | 7.0E-09 | -1.4 | 6.1E-09 | -1.4 | 0.38 |
| ZFAND5          | -1.5 | 9.1E-10 | -1.3 | 4.7E-08 | -1.4 | 0.38 |
| GTF2IRD2        | -1.5 | 4.7E-09 | -1.3 | 7.8E-08 | -1.4 | 0.38 |
| DUSP2           | -1.5 | 1.4E-09 | -1.3 | 5.6E-08 | -1.4 | 0.38 |
| SLC35D2         | -1.4 | 6.3E-09 | -1.4 | 6.6E-09 | -1.4 | 0.38 |
| CPPED1          | -1.2 | 2.5E-06 | -1.6 | 6.4E-10 | -1.4 | 0.38 |
| POLR3C          | -1.4 | 8.1E-09 | -1.4 | 1.2E-08 | -1.4 | 0.38 |
| PID1            | -1.4 | 4.2E-09 | -1.4 | 1.1E-08 | -1.4 | 0.38 |
| DHFRL1          | -1.4 | 5.7E-06 | -1.5 | 2.8E-08 | -1.4 | 0.38 |
| CASP5           | -1.4 | 8.0E-09 | -1.4 | 5.8E-09 | -1.4 | 0.38 |
| ZNF541          | -1.3 | 6.3E-08 | -1.5 | 1.7E-09 | -1.4 | 0.38 |
| PLA2G1B         | -1.2 | 5.5E-07 | -1.6 | 2.2E-09 | -1.4 | 0.38 |
| SESTD1          | -1.3 | 7.3E-08 | -1.5 | 3.1E-09 | -1.4 | 0.38 |
| FLI1            | -1.1 | 4.4E-04 | -1.8 | 1.3E-07 | -1.4 | 0.38 |
| AIM1            | -1.4 | 3.1E-08 | -1.4 | 5.2E-09 | -1.4 | 0.38 |
| GIMAP2          | -1.3 | 3.2E-08 | -1.5 | 1.6E-09 | -1.4 | 0.38 |
| TTC12           | -1.3 | 5.5E-08 | -1.5 | 7.4E-10 | -1.4 | 0.38 |
| SMC2            | -1.3 | 1.2E-07 | -1.5 | 4.5E-09 | -1.4 | 0.38 |
| NCRNA00219      | -1.5 | 2.6E-09 | -1.4 | 1.2E-08 | -1.4 | 0.38 |
| TFF1            | -1.5 | 5.5E-10 | -1.3 | 5.8E-08 | -1.4 | 0.38 |
| JMY             | -1.4 | 2.1E-08 | -1.4 | 4.8E-09 | -1.4 | 0.38 |
| FBLN5           | -1.5 | 2.6E-09 | -1.4 | 1.2E-08 | -1.4 | 0.38 |
| TNFSF12-TNFSF13 | -1.7 | 1.6E-07 | -1.1 | 1.2E-04 | -1.4 | 0.38 |
| TNFSF13         | -1.7 | 1.6E-07 | -1.1 | 1.2E-04 | -1.4 | 0.38 |
| SCRN2           | -1.4 | 2.0E-08 | -1.4 | 5.2E-09 | -1.4 | 0.38 |
| RHOJ            | -1.1 | 2.1E-05 | -1.7 | 3.2E-10 | -1.4 | 0.38 |
| IRF6            | -1.8 | 8.6E-10 | -1.0 | 3.8E-05 | -1.4 | 0.38 |
| WNK4            | -1.2 | 4.5E-07 | -1.6 | 3.7E-10 | -1.4 | 0.38 |
| IFITM3          | -1.5 | 2.4E-09 | -1.4 | 1.2E-08 | -1.4 | 0.38 |
| C4orf31         | -1.4 | 1.7E-08 | -1.4 | 3.9E-09 | -1.4 | 0.38 |
| CLDN7           | -1.5 | 2.1E-09 | -1.4 | 1.2E-08 | -1.4 | 0.38 |

|          |      |         |      |         |      |      |
|----------|------|---------|------|---------|------|------|
| PRSS33   | -1.9 | 3.8E-09 | -1.0 | 1.4E-04 | -1.4 | 0.37 |
| ZNF462   | -1.4 | 4.0E-09 | -1.4 | 5.9E-09 | -1.4 | 0.37 |
| AURKAIP1 | -1.4 | 5.1E-09 | -1.4 | 4.5E-09 | -1.4 | 0.37 |
| SLC22A18 | -1.6 | 3.0E-10 | -1.2 | 1.1E-07 | -1.4 | 0.37 |
| NDUFV1   | -1.5 | 2.4E-09 | -1.4 | 9.2E-09 | -1.4 | 0.37 |
| DNAJC22  | -1.2 | 3.1E-04 | -1.6 | 7.5E-07 | -1.4 | 0.37 |
| GHR      | -1.5 | 3.2E-04 | -1.4 | 4.1E-04 | -1.4 | 0.37 |
| SSSCA1   | -1.4 | 4.7E-09 | -1.4 | 5.7E-09 | -1.4 | 0.37 |
| PARL     | -1.4 | 8.2E-09 | -1.4 | 4.0E-09 | -1.4 | 0.37 |
| CSTL1    | -1.4 | 2.9E-05 | -1.4 | 3.8E-06 | -1.4 | 0.37 |
| SDCBP2   | -1.4 | 5.6E-09 | -1.4 | 7.7E-09 | -1.4 | 0.37 |
| PDP1     | -1.6 | 4.1E-10 | -1.2 | 1.1E-07 | -1.4 | 0.37 |
| EFHD2    | -1.4 | 1.3E-08 | -1.5 | 1.6E-09 | -1.4 | 0.37 |
| GGH      | -1.4 | 4.0E-09 | -1.4 | 5.3E-09 | -1.4 | 0.37 |
| PTPLAD2  | -1.7 | 1.2E-08 | -1.1 | 4.3E-05 | -1.4 | 0.37 |
| TBCCD1   | -1.4 | 1.1E-07 | -1.4 | 3.4E-08 | -1.4 | 0.37 |
| POMP     | -1.4 | 4.2E-09 | -1.4 | 4.5E-09 | -1.4 | 0.37 |
| RAB20    | -1.5 | 5.1E-10 | -1.3 | 3.9E-08 | -1.4 | 0.37 |
| C22orf32 | -1.3 | 1.4E-06 | -1.6 | 2.1E-09 | -1.4 | 0.37 |
| CLN6     | -1.3 | 6.8E-08 | -1.6 | 3.6E-10 | -1.4 | 0.37 |
| GSTO1    | -1.4 | 3.2E-09 | -1.4 | 5.4E-09 | -1.4 | 0.37 |
| HSPB9    | -1.2 | 1.4E-06 | -1.6 | 3.9E-07 | -1.4 | 0.37 |
| FAM102A  | -1.3 | 2.5E-08 | -1.5 | 7.0E-10 | -1.4 | 0.37 |
| TSR2     | -1.3 | 2.5E-07 | -1.6 | 1.7E-09 | -1.4 | 0.37 |
| NKG7     | -1.9 | 4.0E-08 | -0.9 | 3.8E-04 | -1.4 | 0.37 |
| QSOX1    | -1.4 | 3.2E-09 | -1.4 | 5.0E-09 | -1.4 | 0.37 |
| SCYL1    | -1.7 | 2.9E-07 | -1.2 | 1.7E-04 | -1.4 | 0.37 |
| HSPA14   | -1.4 | 1.4E-08 | -1.5 | 1.1E-09 | -1.4 | 0.37 |
| EML3     | -1.3 | 1.9E-06 | -1.5 | 1.3E-07 | -1.4 | 0.37 |
| GAS6     | -1.4 | 1.2E-08 | -1.5 | 1.2E-09 | -1.4 | 0.37 |
| ZNF707   | -1.5 | 4.1E-09 | -1.4 | 2.4E-08 | -1.4 | 0.37 |
| SPINT1   | -1.6 | 1.5E-10 | -1.2 | 1.2E-07 | -1.4 | 0.37 |
| SH3BGRL  | -1.4 | 8.8E-09 | -1.5 | 1.6E-09 | -1.4 | 0.37 |
| CMYA5    | -1.5 | 2.3E-09 | -1.4 | 1.3E-08 | -1.4 | 0.37 |
| C20orf24 | -1.6 | 2.8E-10 | -1.3 | 4.9E-08 | -1.4 | 0.37 |
| KIAA1429 | -1.4 | 2.1E-04 | -1.5 | 3.6E-05 | -1.4 | 0.37 |
| JUND     | -1.7 | 4.5E-11 | -1.2 | 6.9E-07 | -1.4 | 0.37 |
| ITPR2    | -1.3 | 9.7E-08 | -1.6 | 5.1E-10 | -1.4 | 0.37 |
| EME1     | -1.4 | 1.4E-07 | -1.4 | 2.6E-08 | -1.4 | 0.37 |
| ASB9     | -1.3 | 9.9E-08 | -1.6 | 4.6E-10 | -1.4 | 0.37 |
| CD47     | -1.4 | 4.2E-09 | -1.4 | 3.0E-09 | -1.4 | 0.37 |
| RALY     | -1.5 | 7.1E-10 | -1.3 | 2.9E-08 | -1.4 | 0.37 |
| UBAP2L   | -1.5 | 1.8E-09 | -1.4 | 1.2E-08 | -1.4 | 0.37 |
| PHB2     | -1.4 | 5.0E-09 | -1.5 | 2.1E-09 | -1.4 | 0.37 |
| GZF1     | -1.4 | 1.3E-08 | -1.5 | 2.5E-09 | -1.4 | 0.37 |
| RFK      | -1.3 | 2.1E-08 | -1.5 | 5.5E-10 | -1.4 | 0.37 |
| MARK1    | -1.4 | 1.7E-08 | -1.5 | 2.7E-09 | -1.4 | 0.37 |
| SIK2     | -1.5 | 5.4E-08 | -1.4 | 1.8E-07 | -1.4 | 0.37 |
| CDC42EP3 | -1.6 | 3.0E-10 | -1.3 | 7.3E-08 | -1.4 | 0.37 |
| NR3C1    | -1.3 | 2.6E-08 | -1.6 | 4.5E-10 | -1.4 | 0.37 |
| APCDD1   | -1.5 | 1.5E-09 | -1.4 | 7.6E-09 | -1.4 | 0.37 |
| NPC1L1   | -1.4 | 1.3E-07 | -1.5 | 2.4E-08 | -1.4 | 0.37 |
| IL32     | -1.7 | 4.2E-11 | -1.2 | 2.7E-07 | -1.4 | 0.37 |
| RPL10L   | -1.5 | 1.7E-09 | -1.4 | 5.2E-09 | -1.4 | 0.37 |
| RPLP2    | -1.6 | 2.2E-10 | -1.3 | 4.3E-08 | -1.4 | 0.37 |
| NPAS1    | -1.7 | 7.2E-06 | -1.2 | 6.7E-04 | -1.4 | 0.37 |
| ALDH6A1  | -1.4 | 6.7E-09 | -1.5 | 1.5E-09 | -1.4 | 0.37 |
| COL1A1   | -1.5 | 6.7E-10 | -1.4 | 1.2E-08 | -1.4 | 0.37 |
| BIRC3    | -1.5 | 3.0E-09 | -1.4 | 3.3E-09 | -1.4 | 0.37 |
| CAV2     | -1.3 | 2.0E-08 | -1.5 | 5.3E-10 | -1.4 | 0.37 |
| GPRC5A   | -1.7 | 8.6E-11 | -1.2 | 5.7E-07 | -1.4 | 0.37 |
| KCNMB1   | -1.6 | 8.4E-10 | -1.3 | 2.8E-08 | -1.5 | 0.37 |

|          |      |         |      |         |      |      |
|----------|------|---------|------|---------|------|------|
| EMILIN1  | -1.5 | 7.0E-10 | -1.4 | 1.0E-08 | -1.5 | 0.37 |
| RFC3     | -1.3 | 9.5E-08 | -1.6 | 2.8E-10 | -1.5 | 0.37 |
| SELM     | -1.5 | 1.2E-09 | -1.4 | 5.8E-09 | -1.5 | 0.37 |
| RTKN2    | -1.5 | 5.1E-08 | -1.4 | 2.5E-08 | -1.5 | 0.37 |
| C3orf32  | -1.4 | 3.6E-08 | -1.5 | 7.6E-09 | -1.5 | 0.37 |
| MCM7     | -1.3 | 1.6E-08 | -1.6 | 4.0E-10 | -1.5 | 0.37 |
| TRDMT1   | -1.4 | 1.9E-07 | -1.5 | 5.1E-08 | -1.5 | 0.37 |
| SLC44A4  | -1.5 | 8.7E-07 | -1.4 | 9.2E-07 | -1.5 | 0.37 |
| LMOD1    | -1.8 | 1.6E-11 | -1.1 | 1.4E-06 | -1.5 | 0.37 |
| MGC16121 | -1.5 | 8.5E-10 | -1.4 | 7.3E-09 | -1.5 | 0.37 |
| SPATS2L  | -1.6 | 2.8E-10 | -1.3 | 2.3E-08 | -1.5 | 0.37 |
| MFSD2A   | -1.5 | 1.9E-08 | -1.5 | 9.6E-09 | -1.5 | 0.36 |
| RPL18A   | -1.7 | 6.9E-11 | -1.2 | 9.7E-08 | -1.5 | 0.36 |
| LRRN4CL  | -1.5 | 2.6E-08 | -1.4 | 2.1E-08 | -1.5 | 0.36 |
| PLOD2    | -1.5 | 1.2E-09 | -1.4 | 5.6E-09 | -1.5 | 0.36 |
| JAG1     | -1.5 | 2.0E-09 | -1.4 | 2.9E-09 | -1.5 | 0.36 |
| CX3CL1   | -1.5 | 1.6E-09 | -1.4 | 3.2E-09 | -1.5 | 0.36 |
| INPP5D   | -1.4 | 5.7E-09 | -1.5 | 2.9E-05 | -1.5 | 0.36 |
| LAMA4    | -1.3 | 1.9E-08 | -1.6 | 2.5E-10 | -1.5 | 0.36 |
| IL6      | -1.5 | 6.0E-09 | -1.4 | 1.7E-08 | -1.5 | 0.36 |
| ST7      | -1.4 | 1.7E-08 | -1.5 | 7.0E-10 | -1.5 | 0.36 |
| CPM      | -1.5 | 5.0E-09 | -1.5 | 3.2E-09 | -1.5 | 0.36 |
| DHRS12   | -1.5 | 6.8E-10 | -1.4 | 7.8E-09 | -1.5 | 0.36 |
| TCEB2    | -1.5 | 8.4E-10 | -1.4 | 5.0E-09 | -1.5 | 0.36 |
| CCRL2    | -1.3 | 3.2E-07 | -1.7 | 2.5E-10 | -1.5 | 0.36 |
| GMPPB    | -1.5 | 5.6E-08 | -1.4 | 4.3E-07 | -1.5 | 0.36 |
| ATP6V1C2 | -1.1 | 5.6E-05 | -1.9 | 9.3E-10 | -1.5 | 0.36 |
| BRP44L   | -1.8 | 1.1E-11 | -1.2 | 4.6E-07 | -1.5 | 0.36 |
| B3GNT5   | -1.4 | 3.6E-09 | -1.5 | 1.0E-09 | -1.5 | 0.36 |
| WFDC1    | -1.4 | 7.8E-09 | -1.5 | 5.7E-10 | -1.5 | 0.36 |
| ADPRHL1  | -1.3 | 4.4E-08 | -1.6 | 1.1E-10 | -1.5 | 0.36 |
| EFHD1    | -1.5 | 1.7E-08 | -1.4 | 2.3E-08 | -1.5 | 0.36 |
| PHACTR2  | -1.5 | 2.6E-09 | -1.5 | 1.4E-09 | -1.5 | 0.36 |
| EPHX1    | -1.6 | 3.3E-10 | -1.4 | 1.6E-08 | -1.5 | 0.36 |
| RG9MTD2  | -1.7 | 1.1E-07 | -1.3 | 1.8E-06 | -1.5 | 0.36 |
| TNFRSF1A | -1.3 | 2.8E-08 | -1.6 | 1.2E-10 | -1.5 | 0.36 |
| SCNN1A   | -1.3 | 1.6E-07 | -1.6 | 1.3E-09 | -1.5 | 0.36 |
| ARHGAP24 | -1.4 | 3.7E-05 | -1.6 | 4.4E-07 | -1.5 | 0.36 |
| DZIP1L   | -1.6 | 9.1E-07 | -1.3 | 1.3E-06 | -1.5 | 0.36 |
| CDS1     | -1.9 | 5.3E-12 | -1.1 | 4.3E-06 | -1.5 | 0.36 |
| NEURL2   | -1.3 | 1.2E-06 | -1.7 | 9.9E-10 | -1.5 | 0.36 |
| NFE2     | -1.6 | 1.2E-07 | -1.3 | 2.3E-06 | -1.5 | 0.36 |
| TNFRSF1B | -1.5 | 2.8E-09 | -1.4 | 1.5E-08 | -1.5 | 0.36 |
| KRTDAP   | -1.4 | 7.5E-08 | -1.6 | 8.2E-10 | -1.5 | 0.36 |
| TUBGCP3  | -1.3 | 2.6E-07 | -1.6 | 1.7E-09 | -1.5 | 0.36 |
| OXCT1    | -1.6 | 6.1E-10 | -1.4 | 1.2E-08 | -1.5 | 0.36 |
| MFAP4    | -1.5 | 8.3E-10 | -1.5 | 2.4E-09 | -1.5 | 0.36 |
| XBP1     | -1.3 | 5.5E-08 | -1.7 | 4.2E-11 | -1.5 | 0.36 |
| CORO2A   | -1.3 | 2.4E-08 | -1.6 | 1.2E-10 | -1.5 | 0.36 |
| CDKN1A   | -1.6 | 1.9E-10 | -1.4 | 1.1E-08 | -1.5 | 0.36 |
| TRIM26   | -1.5 | 9.1E-09 | -1.4 | 2.0E-08 | -1.5 | 0.36 |
| CDC6     | -1.2 | 8.4E-07 | -1.7 | 4.2E-11 | -1.5 | 0.36 |
| CD3D     | -1.4 | 1.4E-06 | -1.6 | 3.8E-08 | -1.5 | 0.36 |
| PSMD13   | -1.4 | 4.8E-09 | -1.6 | 4.9E-10 | -1.5 | 0.36 |
| ECGF1    | -1.5 | 6.0E-10 | -1.4 | 3.3E-09 | -1.5 | 0.36 |
| VNN3     | -1.7 | 8.3E-05 | -1.3 | 9.2E-05 | -1.5 | 0.36 |
| RASSF8   | -1.6 | 6.8E-06 | -1.4 | 1.3E-04 | -1.5 | 0.36 |
| ISG20    | -1.4 | 1.4E-08 | -1.6 | 1.3E-10 | -1.5 | 0.36 |
| HGSNAT   | -1.4 | 1.6E-05 | -1.6 | 1.4E-06 | -1.5 | 0.36 |
| MYBBP1A  | -1.5 | 7.2E-09 | -1.5 | 7.7E-09 | -1.5 | 0.36 |
| PEX7     | -1.4 | 7.9E-09 | -1.6 | 2.4E-10 | -1.5 | 0.36 |
| GLT8D2   | -1.5 | 7.8E-10 | -1.4 | 3.0E-09 | -1.5 | 0.36 |

|            |      |         |      |         |      |      |
|------------|------|---------|------|---------|------|------|
| EDA        | -1.8 | 8.2E-10 | -1.2 | 1.3E-06 | -1.5 | 0.36 |
| APOE       | -1.5 | 9.0E-10 | -1.5 | 1.8E-09 | -1.5 | 0.35 |
| E2F8       | -1.8 | 3.2E-09 | -1.2 | 2.5E-06 | -1.5 | 0.35 |
| ABLIM1     | -1.9 | 3.0E-12 | -1.1 | 7.1E-07 | -1.5 | 0.35 |
| MCF2       | -1.5 | 7.2E-07 | -1.5 | 2.4E-07 | -1.5 | 0.35 |
| SKP2       | -1.6 | 7.7E-09 | -1.4 | 2.7E-07 | -1.5 | 0.35 |
| ASB1       | -1.5 | 1.8E-07 | -1.5 | 2.9E-08 | -1.5 | 0.35 |
| WBP11      | -1.3 | 2.0E-08 | -1.7 | 7.2E-11 | -1.5 | 0.35 |
| TCEAL1     | -1.4 | 3.1E-09 | -1.6 | 4.0E-10 | -1.5 | 0.35 |
| CCND1      | -1.4 | 4.4E-09 | -1.6 | 5.4E-10 | -1.5 | 0.35 |
| RBMS1      | -1.5 | 2.0E-09 | -1.5 | 7.4E-10 | -1.5 | 0.35 |
| TM4SF1     | -1.6 | 2.0E-10 | -1.4 | 6.0E-09 | -1.5 | 0.35 |
| ITPRIP     | -1.5 | 2.8E-09 | -1.6 | 4.7E-10 | -1.5 | 0.35 |
| FGFR1OP    | -1.5 | 9.6E-10 | -1.5 | 1.2E-09 | -1.5 | 0.35 |
| ROR2       | -1.6 | 6.0E-10 | -1.4 | 6.3E-09 | -1.5 | 0.35 |
| TTLL4      | -1.4 | 1.5E-07 | -1.6 | 2.5E-09 | -1.5 | 0.35 |
| KRT8       | -1.6 | 3.7E-10 | -1.5 | 2.5E-09 | -1.5 | 0.35 |
| COL10A1    | -1.5 | 2.3E-09 | -1.5 | 1.3E-09 | -1.5 | 0.35 |
| RSPO1      | -1.3 | 5.4E-05 | -1.7 | 3.9E-07 | -1.5 | 0.35 |
| SPA17      | -1.4 | 6.6E-09 | -1.6 | 3.5E-10 | -1.5 | 0.35 |
| DSC2       | -1.8 | 1.2E-07 | -1.3 | 3.4E-05 | -1.5 | 0.35 |
| ASPG       | -2.1 | 1.7E-12 | -1.0 | 2.1E-05 | -1.5 | 0.35 |
| HIST1H3C   | -1.6 | 1.9E-10 | -1.4 | 4.1E-09 | -1.5 | 0.35 |
| TMEM192    | -1.5 | 1.1E-08 | -1.5 | 1.0E-08 | -1.5 | 0.35 |
| DPYD       | -1.5 | 1.0E-08 | -1.6 | 7.3E-10 | -1.5 | 0.35 |
| SESN1      | -1.5 | 5.4E-10 | -1.5 | 1.5E-09 | -1.5 | 0.35 |
| TSC22D1    | -1.7 | 9.0E-11 | -1.4 | 9.2E-09 | -1.5 | 0.35 |
| FA2H       | -1.5 | 2.6E-09 | -1.6 | 2.8E-10 | -1.5 | 0.35 |
| HNF1B      | -1.2 | 1.7E-04 | -1.9 | 4.9E-08 | -1.5 | 0.35 |
| FAM117A    | -1.5 | 5.0E-10 | -1.5 | 1.3E-09 | -1.5 | 0.35 |
| CTNNA1     | -1.3 | 1.7E-08 | -1.7 | 4.1E-11 | -1.5 | 0.35 |
| ECE2       | -1.5 | 1.5E-09 | -1.5 | 5.0E-10 | -1.5 | 0.35 |
| TNFRSF12A  | -1.4 | 8.8E-09 | -1.7 | 7.2E-11 | -1.5 | 0.35 |
| SNX12      | -1.3 | 1.1E-07 | -1.8 | 2.8E-11 | -1.5 | 0.35 |
| ZNF622     | -1.4 | 4.1E-09 | -1.6 | 1.5E-10 | -1.5 | 0.35 |
| ACAN       | -1.3 | 8.1E-06 | -1.8 | 6.5E-10 | -1.5 | 0.35 |
| TPSAB1     | -1.9 | 1.7E-12 | -1.1 | 5.9E-07 | -1.5 | 0.35 |
| MYCBPAP    | -1.3 | 5.6E-08 | -1.8 | 2.1E-11 | -1.5 | 0.35 |
| SERPINE2   | -1.8 | 6.4E-12 | -1.2 | 1.1E-07 | -1.5 | 0.35 |
| KLHL7      | -1.6 | 2.0E-10 | -1.4 | 5.9E-09 | -1.5 | 0.35 |
| ADH1C      | -1.4 | 1.4E-08 | -1.6 | 1.7E-10 | -1.5 | 0.35 |
| FAM105A    | -1.5 | 2.6E-09 | -1.6 | 6.1E-10 | -1.5 | 0.35 |
| BAG2       | -1.5 | 9.8E-10 | -1.5 | 5.4E-10 | -1.5 | 0.35 |
| KIAA1383   | -1.4 | 5.6E-05 | -1.7 | 3.9E-06 | -1.5 | 0.35 |
| NID2       | -1.3 | 2.3E-08 | -1.7 | 2.3E-11 | -1.5 | 0.35 |
| BHMT2      | -1.4 | 3.5E-06 | -1.6 | 1.4E-08 | -1.5 | 0.35 |
| ANKRD36BP1 | -1.5 | 2.8E-09 | -1.6 | 2.6E-10 | -1.5 | 0.35 |
| LNX1       | -1.3 | 1.3E-04 | -1.8 | 3.1E-08 | -1.5 | 0.35 |
| PEX3       | -1.6 | 1.1E-09 | -1.5 | 1.3E-09 | -1.5 | 0.35 |
| RANGAP1    | -1.7 | 1.3E-09 | -1.3 | 6.3E-07 | -1.5 | 0.35 |
| VDR        | -1.6 | 1.7E-10 | -1.5 | 2.8E-09 | -1.5 | 0.35 |
| MST1R      | -1.5 | 5.3E-09 | -1.6 | 3.9E-10 | -1.5 | 0.35 |
| SOD3       | -1.7 | 4.9E-11 | -1.4 | 7.7E-09 | -1.5 | 0.34 |
| DSCC1      | -1.5 | 5.1E-09 | -1.6 | 2.1E-10 | -1.5 | 0.34 |
| TGFBR2     | -1.6 | 7.7E-08 | -1.4 | 2.1E-07 | -1.5 | 0.34 |
| OAS1       | -1.6 | 5.6E-10 | -1.5 | 1.5E-09 | -1.5 | 0.34 |
| PEG3       | -1.9 | 2.7E-12 | -1.1 | 1.1E-06 | -1.5 | 0.34 |
| ZIM2       | -1.9 | 2.7E-12 | -1.1 | 1.1E-06 | -1.5 | 0.34 |
| FKBP11     | -1.5 | 5.6E-10 | -1.5 | 5.9E-10 | -1.5 | 0.34 |
| TAPBPL     | -1.7 | 2.0E-09 | -1.4 | 4.4E-08 | -1.5 | 0.34 |
| PPAPDC3    | -1.6 | 2.8E-10 | -1.5 | 1.4E-09 | -1.5 | 0.34 |
| FIS1       | -1.5 | 1.4E-09 | -1.6 | 2.3E-10 | -1.5 | 0.34 |

|          |      |         |      |         |      |      |
|----------|------|---------|------|---------|------|------|
| ZSWIM3   | -1.6 | 6.0E-09 | -1.5 | 1.0E-08 | -1.5 | 0.34 |
| C19orf39 | -1.5 | 7.5E-10 | -1.5 | 8.8E-10 | -1.5 | 0.34 |
| ACOT9    | -1.6 | 1.4E-10 | -1.5 | 2.3E-09 | -1.5 | 0.34 |
| CHMP2B   | -1.6 | 4.3E-10 | -1.5 | 7.0E-10 | -1.5 | 0.34 |
| THAP7    | -1.4 | 1.7E-06 | -1.7 | 1.0E-07 | -1.5 | 0.34 |
| SNX21    | -1.4 | 4.3E-09 | -1.7 | 7.2E-11 | -1.5 | 0.34 |
| NAT6     | -1.4 | 2.2E-06 | -1.7 | 3.0E-09 | -1.5 | 0.34 |
| GFRA1    | -1.5 | 4.9E-06 | -1.6 | 7.6E-07 | -1.5 | 0.34 |
| PPARGC1A | -1.6 | 2.1E-10 | -1.4 | 5.2E-09 | -1.5 | 0.34 |
| DSCAML1  | -1.6 | 2.5E-08 | -1.5 | 2.1E-08 | -1.5 | 0.34 |
| ANO1     | -1.6 | 4.0E-09 | -1.5 | 4.0E-09 | -1.5 | 0.34 |
| VWA5A    | -1.6 | 2.2E-05 | -1.5 | 1.7E-05 | -1.5 | 0.34 |
| TRPC6    | -1.7 | 1.9E-09 | -1.4 | 3.4E-08 | -1.5 | 0.34 |
| TJP2     | -1.5 | 1.9E-09 | -1.6 | 1.2E-10 | -1.5 | 0.34 |
| MUC1     | -1.8 | 1.2E-11 | -1.3 | 2.7E-08 | -1.5 | 0.34 |
| LIPG     | -2.0 | 4.6E-11 | -1.1 | 4.1E-06 | -1.5 | 0.34 |
| C1GALT1  | -1.7 | 2.2E-09 | -1.4 | 4.4E-08 | -1.6 | 0.34 |
| CXCR3    | -1.7 | 1.3E-09 | -1.4 | 2.4E-08 | -1.6 | 0.34 |
| BTN3A2   | -1.6 | 3.8E-10 | -1.5 | 8.2E-10 | -1.6 | 0.34 |
| WBSCR16  | -1.7 | 1.9E-07 | -1.4 | 3.5E-07 | -1.6 | 0.34 |
| SUOX     | -1.8 | 1.9E-07 | -1.3 | 9.5E-06 | -1.6 | 0.34 |
| C1orf107 | -2.0 | 1.0E-06 | -1.1 | 2.1E-04 | -1.6 | 0.34 |
| ITIH5    | -1.8 | 1.6E-07 | -1.3 | 1.8E-08 | -1.6 | 0.34 |
| RNF32    | -1.4 | 8.7E-04 | -1.7 | 1.0E-05 | -1.6 | 0.34 |
| FHL5     | -1.5 | 5.1E-05 | -1.6 | 1.9E-06 | -1.6 | 0.34 |
| CFI      | -1.5 | 7.8E-10 | -1.6 | 2.5E-10 | -1.6 | 0.34 |
| SLC43A1  | -1.6 | 1.4E-09 | -1.6 | 7.3E-10 | -1.6 | 0.34 |
| SDC4     | -1.6 | 1.6E-10 | -1.5 | 1.1E-09 | -1.6 | 0.34 |
| MAD2L1   | -1.5 | 2.5E-09 | -1.7 | 7.2E-11 | -1.6 | 0.34 |
| ATAD3B   | -1.5 | 1.1E-07 | -1.6 | 5.9E-09 | -1.6 | 0.34 |
| GJA5     | -1.5 | 8.6E-09 | -1.6 | 8.6E-10 | -1.6 | 0.34 |
| STARD10  | -1.7 | 8.8E-11 | -1.4 | 3.7E-09 | -1.6 | 0.34 |
| STAB2    | -1.7 | 1.4E-10 | -1.5 | 2.4E-09 | -1.6 | 0.34 |
| POLQ     | -1.8 | 6.2E-11 | -1.4 | 2.0E-08 | -1.6 | 0.34 |
| TTC8     | -1.6 | 2.3E-10 | -1.5 | 6.8E-10 | -1.6 | 0.34 |
| LHPP     | -1.6 | 1.2E-10 | -1.5 | 1.1E-09 | -1.6 | 0.34 |
| ADH1A    | -1.6 | 3.0E-10 | -1.5 | 1.9E-09 | -1.6 | 0.34 |
| KCNS3    | -1.4 | 1.6E-08 | -1.7 | 4.6E-11 | -1.6 | 0.34 |
| CHDH     | -2.0 | 1.2E-10 | -1.2 | 3.5E-06 | -1.6 | 0.34 |
| FAM46A   | -1.7 | 5.2E-11 | -1.5 | 2.1E-09 | -1.6 | 0.34 |
| CD248    | -1.4 | 3.4E-09 | -1.7 | 3.3E-11 | -1.6 | 0.34 |
| RAMP1    | -1.5 | 5.6E-10 | -1.6 | 1.7E-10 | -1.6 | 0.34 |
| CARD14   | -1.7 | 2.0E-07 | -1.4 | 1.5E-06 | -1.6 | 0.34 |
| PTPRH    | -1.7 | 2.4E-10 | -1.4 | 1.1E-08 | -1.6 | 0.34 |
| EMP1     | -1.6 | 2.6E-10 | -1.6 | 3.5E-10 | -1.6 | 0.34 |
| XAF1     | -1.8 | 1.0E-11 | -1.4 | 1.7E-08 | -1.6 | 0.34 |
| BECN1    | -1.4 | 5.3E-09 | -1.7 | 1.9E-11 | -1.6 | 0.34 |
| SH2D4A   | -1.5 | 2.1E-08 | -1.6 | 8.9E-10 | -1.6 | 0.34 |
| JAM2     | -1.5 | 9.8E-10 | -1.6 | 1.1E-10 | -1.6 | 0.33 |
| CFLAR    | -1.5 | 1.7E-09 | -1.7 | 6.4E-11 | -1.6 | 0.33 |
| CX3CR1   | -1.3 | 4.0E-07 | -1.8 | 1.0E-10 | -1.6 | 0.33 |
| MLLT4    | -1.7 | 2.3E-08 | -1.4 | 1.1E-06 | -1.6 | 0.33 |
| BCL11B   | -2.0 | 6.2E-10 | -1.1 | 5.0E-06 | -1.6 | 0.33 |
| ZBTB38   | -1.6 | 2.8E-10 | -1.6 | 2.9E-10 | -1.6 | 0.33 |
| RBPM5    | -1.5 | 7.2E-10 | -1.6 | 1.3E-10 | -1.6 | 0.33 |
| MMP19    | -1.8 | 1.8E-11 | -1.4 | 9.5E-09 | -1.6 | 0.33 |
| ABHD14B  | -1.6 | 6.2E-09 | -1.6 | 4.4E-09 | -1.6 | 0.33 |
| SLC9A3R1 | -1.6 | 9.8E-11 | -1.5 | 7.2E-10 | -1.6 | 0.33 |
| ADHFE1   | -1.7 | 3.9E-11 | -1.4 | 4.0E-09 | -1.6 | 0.33 |
| LGALS3BP | -1.7 | 2.8E-11 | -1.5 | 2.4E-09 | -1.6 | 0.33 |
| AGFG2    | -1.8 | 1.5E-11 | -1.4 | 1.5E-08 | -1.6 | 0.33 |
| TTC39A   | -1.4 | 2.5E-08 | -1.8 | 1.8E-11 | -1.6 | 0.33 |

|           |      |         |      |         |      |      |
|-----------|------|---------|------|---------|------|------|
| PPP1R12B  | -1.5 | 1.9E-09 | -1.7 | 3.3E-11 | -1.6 | 0.33 |
| EXOC3L    | -2.1 | 3.6E-07 | -1.1 | 3.1E-04 | -1.6 | 0.33 |
| MED30     | -1.4 | 4.3E-09 | -1.7 | 1.7E-11 | -1.6 | 0.33 |
| WTAP      | -1.5 | 1.6E-09 | -1.7 | 3.5E-11 | -1.6 | 0.33 |
| STAG3     | -1.4 | 4.4E-09 | -1.8 | 1.4E-11 | -1.6 | 0.33 |
| PABPC4    | -1.5 | 9.9E-09 | -1.7 | 3.6E-10 | -1.6 | 0.33 |
| GCKR      | -1.6 | 1.9E-09 | -1.6 | 2.2E-10 | -1.6 | 0.33 |
| MEF2C     | -1.6 | 2.1E-10 | -1.6 | 2.8E-10 | -1.6 | 0.33 |
| C17orf55  | -1.8 | 1.1E-10 | -1.4 | 2.5E-08 | -1.6 | 0.33 |
| TMC6      | -1.6 | 7.2E-10 | -1.6 | 1.2E-10 | -1.6 | 0.33 |
| SAMD9     | -0.9 | 3.3E-05 | -2.3 | 3.2E-05 | -1.6 | 0.33 |
| ODF2      | -1.7 | 4.1E-09 | -1.6 | 3.0E-09 | -1.6 | 0.33 |
| CRIP1     | -1.7 | 3.7E-11 | -1.5 | 9.2E-10 | -1.6 | 0.33 |
| CD8B      | -1.9 | 2.7E-11 | -1.3 | 3.8E-08 | -1.6 | 0.33 |
| FLJ42875  | -1.6 | 7.0E-09 | -1.6 | 2.1E-09 | -1.6 | 0.33 |
| STEAP3    | -1.7 | 2.2E-11 | -1.5 | 2.0E-09 | -1.6 | 0.33 |
| ACY1      | -1.9 | 3.5E-12 | -1.4 | 1.3E-08 | -1.6 | 0.33 |
| KLK13     | -1.7 | 6.4E-06 | -1.6 | 5.4E-06 | -1.6 | 0.33 |
| OSTAlpha  | -1.6 | 6.6E-09 | -1.7 | 2.8E-10 | -1.6 | 0.33 |
| MMP9      | -1.7 | 1.1E-10 | -1.6 | 4.8E-10 | -1.6 | 0.33 |
| DCLK1     | -1.7 | 1.4E-09 | -1.5 | 3.6E-09 | -1.6 | 0.33 |
| TMEM176B  | -1.8 | 1.4E-11 | -1.5 | 2.2E-09 | -1.6 | 0.33 |
| AMIGO2    | -1.5 | 6.6E-10 | -1.7 | 5.4E-11 | -1.6 | 0.33 |
| CLDN10    | -1.5 | 3.2E-09 | -1.7 | 7.2E-11 | -1.6 | 0.33 |
| FABP3     | -1.9 | 4.5E-12 | -1.4 | 1.5E-08 | -1.6 | 0.33 |
| RASSF9    | -1.2 | 7.4E-06 | -2.1 | 4.6E-11 | -1.6 | 0.33 |
| C14orf149 | -1.6 | 1.2E-10 | -1.6 | 2.4E-10 | -1.6 | 0.33 |
| CREG2     | -1.2 | 4.4E-05 | -2.0 | 3.7E-08 | -1.6 | 0.33 |
| C1QTNF7   | -2.3 | 3.6E-13 | -0.9 | 5.1E-05 | -1.6 | 0.32 |
| INHBA     | -1.6 | 1.5E-10 | -1.6 | 1.3E-10 | -1.6 | 0.32 |
| THBD      | -1.5 | 8.9E-10 | -1.7 | 2.3E-11 | -1.6 | 0.32 |
| FAM13A    | -2.0 | 5.6E-11 | -1.3 | 3.1E-07 | -1.6 | 0.32 |
| PRDM1     | -1.6 | 6.0E-08 | -1.6 | 5.7E-08 | -1.6 | 0.32 |
| EFCAB2    | -1.6 | 8.3E-10 | -1.7 | 1.6E-10 | -1.6 | 0.32 |
| OXR1      | -1.7 | 1.2E-10 | -1.6 | 8.2E-06 | -1.6 | 0.32 |
| TALDO1    | -1.7 | 3.9E-11 | -1.6 | 4.2E-10 | -1.6 | 0.32 |
| NDC80     | -1.7 | 5.3E-11 | -1.6 | 3.3E-10 | -1.6 | 0.32 |
| MAN1C1    | -1.5 | 1.7E-09 | -1.8 | 1.0E-11 | -1.6 | 0.32 |
| SMPD3     | -1.7 | 7.4E-11 | -1.6 | 5.1E-10 | -1.6 | 0.32 |
| PAQR8     | -1.6 | 2.4E-10 | -1.6 | 1.1E-10 | -1.6 | 0.32 |
| PARP11    | -1.9 | 1.4E-06 | -1.3 | 7.6E-05 | -1.6 | 0.32 |
| ANXA2     | -1.9 | 3.3E-12 | -1.4 | 5.8E-09 | -1.6 | 0.32 |
| TAGAP     | -1.8 | 1.2E-07 | -1.5 | 7.8E-07 | -1.6 | 0.32 |
| PLA1A     | -1.7 | 2.6E-09 | -1.6 | 2.4E-09 | -1.6 | 0.32 |
| KIAA0040  | -1.8 | 1.0E-06 | -1.4 | 1.3E-05 | -1.6 | 0.32 |
| LRRCS9    | -1.6 | 1.4E-10 | -1.6 | 8.7E-11 | -1.6 | 0.32 |
| TRIM22    | -1.8 | 7.8E-12 | -1.4 | 4.9E-09 | -1.6 | 0.32 |
| SGCD      | -1.7 | 1.8E-08 | -1.6 | 6.0E-05 | -1.6 | 0.32 |
| COX5A     | -1.7 | 5.5E-11 | -1.6 | 1.9E-10 | -1.6 | 0.32 |
| PPL       | -1.7 | 2.3E-11 | -1.5 | 5.1E-10 | -1.6 | 0.32 |
| MYLIP     | -1.7 | 1.8E-11 | -1.5 | 5.5E-10 | -1.6 | 0.32 |
| S100A6    | -1.5 | 5.7E-10 | -1.7 | 1.7E-11 | -1.6 | 0.32 |
| PCNA      | -1.7 | 2.4E-11 | -1.6 | 3.9E-10 | -1.6 | 0.32 |
| NPAT      | -2.0 | 1.0E-09 | -1.3 | 1.6E-06 | -1.6 | 0.32 |
| PLAC8     | -1.5 | 9.1E-09 | -1.8 | 2.3E-11 | -1.6 | 0.32 |
| FKBP7     | -1.7 | 3.5E-11 | -1.6 | 2.6E-10 | -1.6 | 0.32 |
| COL21A1   | -1.4 | 5.5E-07 | -1.9 | 9.3E-10 | -1.6 | 0.32 |
| PARP12    | -1.6 | 4.4E-10 | -1.7 | 1.2E-10 | -1.6 | 0.32 |
| NUF2      | -1.6 | 2.4E-10 | -1.7 | 3.9E-11 | -1.6 | 0.32 |
| ACSL5     | -1.6 | 1.0E-10 | -1.7 | 7.5E-11 | -1.6 | 0.32 |
| FLJ40504  | -1.6 | 2.9E-10 | -1.7 | 2.6E-11 | -1.6 | 0.32 |
| SETBP1    | -1.7 | 2.4E-11 | -1.6 | 3.6E-10 | -1.6 | 0.32 |

|         |      |         |      |         |      |      |
|---------|------|---------|------|---------|------|------|
| DIO2    | -1.8 | 1.3E-11 | -1.5 | 4.1E-09 | -1.6 | 0.32 |
| COL5A1  | -1.8 | 1.2E-10 | -1.5 | 7.3E-09 | -1.7 | 0.32 |
| LRIG1   | -1.7 | 7.6E-11 | -1.6 | 9.5E-11 | -1.7 | 0.32 |
| SEMA3C  | -1.6 | 6.6E-10 | -1.7 | 4.4E-11 | -1.7 | 0.32 |
| PCSK5   | -1.6 | 1.2E-10 | -1.7 | 5.8E-11 | -1.7 | 0.32 |
| PRELP   | -1.9 | 2.0E-12 | -1.4 | 1.5E-08 | -1.7 | 0.32 |
| BATF2   | -1.7 | 1.9E-10 | -1.6 | 5.4E-10 | -1.7 | 0.32 |
| LTBR    | -1.9 | 4.1E-12 | -1.5 | 3.1E-09 | -1.7 | 0.32 |
| CST3    | -1.8 | 1.5E-11 | -1.6 | 3.7E-10 | -1.7 | 0.32 |
| TMEM27  | -1.5 | 7.0E-06 | -1.8 | 2.4E-08 | -1.7 | 0.32 |
| MYL9    | -1.9 | 3.0E-12 | -1.5 | 2.0E-09 | -1.7 | 0.32 |
| ZNF431  | -1.8 | 2.6E-10 | -1.5 | 3.7E-09 | -1.7 | 0.32 |
| PLEKHN1 | -2.0 | 1.5E-11 | -1.4 | 4.8E-08 | -1.7 | 0.32 |
| UNC13D  | -1.8 | 5.7E-12 | -1.5 | 1.1E-09 | -1.7 | 0.32 |
| TWIST2  | -1.7 | 5.2E-11 | -1.6 | 4.1E-10 | -1.7 | 0.32 |
| LYZ     | -1.7 | 2.4E-11 | -1.6 | 2.6E-10 | -1.7 | 0.31 |
| CTSO    | -2.3 | 5.2E-10 | -1.1 | 1.5E-04 | -1.7 | 0.31 |
| SGOL2   | -1.7 | 2.5E-10 | -1.6 | 8.3E-10 | -1.7 | 0.31 |
| PTPN6   | -1.8 | 8.1E-10 | -1.6 | 5.3E-09 | -1.7 | 0.31 |
| TMEM125 | -1.7 | 5.9E-11 | -1.7 | 7.9E-11 | -1.7 | 0.31 |
| SNRPB   | -1.5 | 2.4E-09 | -1.9 | 2.0E-12 | -1.7 | 0.31 |
| ZNF165  | -1.6 | 7.6E-10 | -1.8 | 1.1E-11 | -1.7 | 0.31 |
| EMCN    | -1.6 | 1.8E-09 | -1.8 | 2.3E-11 | -1.7 | 0.31 |
| AOC3    | -1.8 | 1.7E-11 | -1.6 | 2.3E-10 | -1.7 | 0.31 |
| ROBO3   | -1.7 | 6.8E-11 | -1.7 | 5.1E-11 | -1.7 | 0.31 |
| KHK     | -1.7 | 1.6E-09 | -1.7 | 7.8E-10 | -1.7 | 0.31 |
| COPZ2   | -1.9 | 4.6E-12 | -1.4 | 7.3E-09 | -1.7 | 0.31 |
| GZMB    | -1.5 | 7.6E-09 | -1.8 | 2.2E-11 | -1.7 | 0.31 |
| C9orf72 | -1.7 | 9.0E-08 | -1.7 | 4.1E-08 | -1.7 | 0.31 |
| ATAD3A  | -1.7 | 3.6E-11 | -1.6 | 5.9E-09 | -1.7 | 0.31 |
| NEK2    | -1.6 | 1.0E-09 | -1.8 | 1.4E-11 | -1.7 | 0.31 |
| AQP11   | -1.4 | 4.0E-08 | -1.9 | 7.5E-12 | -1.7 | 0.31 |
| KLRB1   | -1.7 | 4.1E-07 | -1.7 | 2.4E-08 | -1.7 | 0.31 |
| CCDC48  | -1.6 | 1.3E-10 | -1.7 | 2.7E-11 | -1.7 | 0.31 |
| PIGT    | -1.8 | 1.5E-11 | -1.6 | 1.7E-10 | -1.7 | 0.31 |
| IER2    | -1.9 | 2.2E-12 | -1.5 | 1.4E-09 | -1.7 | 0.31 |
| CNRIP1  | -1.9 | 2.3E-12 | -1.5 | 2.4E-09 | -1.7 | 0.31 |
| ABCA8   | -1.7 | 7.4E-11 | -1.7 | 5.2E-11 | -1.7 | 0.31 |
| SAMD3   | -1.9 | 3.2E-07 | -1.4 | 2.9E-04 | -1.7 | 0.31 |
| RPP25   | -1.6 | 2.1E-10 | -1.8 | 2.0E-11 | -1.7 | 0.31 |
| CXCL13  | -1.3 | 2.7E-07 | -2.1 | 3.6E-13 | -1.7 | 0.31 |
| SLC2A12 | -1.5 | 1.9E-09 | -1.9 | 5.1E-12 | -1.7 | 0.31 |
| CYP17A1 | -1.8 | 3.2E-05 | -1.6 | 4.2E-05 | -1.7 | 0.31 |
| TESC    | -1.8 | 8.0E-12 | -1.6 | 3.0E-10 | -1.7 | 0.31 |
| SAA2    | -1.9 | 5.1E-10 | -1.4 | 4.8E-08 | -1.7 | 0.31 |
| PPP1R3B | -1.6 | 7.2E-05 | -1.8 | 9.2E-07 | -1.7 | 0.31 |
| SLC7A8  | -1.6 | 4.3E-10 | -1.8 | 5.7E-12 | -1.7 | 0.31 |
| RHOBTB3 | -1.6 | 2.3E-10 | -1.8 | 1.1E-11 | -1.7 | 0.31 |
| COL18A1 | -2.0 | 6.0E-13 | -1.4 | 5.2E-09 | -1.7 | 0.31 |
| CRIM1   | -1.8 | 1.4E-11 | -1.5 | 1.4E-09 | -1.7 | 0.31 |
| IFI27   | -1.9 | 3.2E-12 | -1.5 | 7.3E-10 | -1.7 | 0.31 |
| ITIH3   | -1.6 | 8.2E-09 | -1.8 | 8.3E-11 | -1.7 | 0.31 |
| TMEM41A | -1.9 | 4.2E-12 | -1.5 | 2.6E-09 | -1.7 | 0.31 |
| GZMK    | -1.8 | 2.1E-08 | -1.6 | 2.8E-08 | -1.7 | 0.31 |
| MRGPRF  | -1.7 | 2.5E-11 | -1.7 | 8.9E-11 | -1.7 | 0.31 |
| LYPD6B  | -1.8 | 7.2E-11 | -1.6 | 1.1E-09 | -1.7 | 0.31 |
| WBSCR27 | -1.9 | 4.8E-11 | -1.5 | 1.3E-08 | -1.7 | 0.31 |
| NHLRC3  | -1.7 | 8.7E-11 | -1.7 | 1.1E-10 | -1.7 | 0.31 |
| LTBP3   | -1.8 | 1.6E-11 | -1.6 | 1.5E-10 | -1.7 | 0.31 |
| RBFOX1  | -1.7 | 1.1E-06 | -1.7 | 5.9E-08 | -1.7 | 0.31 |
| GAS2    | -1.6 | 4.5E-10 | -1.7 | 3.4E-11 | -1.7 | 0.31 |
| RORA    | -1.8 | 5.8E-10 | -1.6 | 2.6E-09 | -1.7 | 0.31 |

|           |      |         |      |         |      |      |
|-----------|------|---------|------|---------|------|------|
| STAP2     | -1.8 | 8.5E-12 | -1.6 | 4.2E-10 | -1.7 | 0.31 |
| CD9       | -1.6 | 1.5E-10 | -1.8 | 9.6E-12 | -1.7 | 0.31 |
| RAC2      | -1.8 | 1.5E-11 | -1.6 | 1.1E-10 | -1.7 | 0.31 |
| IL1F7     | -2.0 | 6.2E-12 | -1.4 | 1.2E-08 | -1.7 | 0.31 |
| MCFD2     | -1.9 | 3.3E-12 | -1.5 | 6.1E-10 | -1.7 | 0.31 |
| FAM83D    | -1.7 | 8.5E-11 | -1.7 | 3.8E-11 | -1.7 | 0.31 |
| TMEM163   | -2.0 | 2.6E-09 | -1.4 | 7.2E-06 | -1.7 | 0.31 |
| LBH       | -1.9 | 1.2E-12 | -1.5 | 1.5E-09 | -1.7 | 0.31 |
| GNG12     | -1.8 | 1.6E-11 | -1.6 | 4.3E-10 | -1.7 | 0.31 |
| FAM108C1  | -1.8 | 5.4E-12 | -1.6 | 2.4E-10 | -1.7 | 0.31 |
| SCARB1    | -1.5 | 7.6E-08 | -1.9 | 7.0E-10 | -1.7 | 0.31 |
| PI3       | -2.0 | 3.2E-13 | -1.4 | 1.2E-08 | -1.7 | 0.31 |
| FOXM1     | -1.9 | 3.9E-12 | -1.5 | 1.7E-09 | -1.7 | 0.31 |
| ADRBK2    | -1.6 | 3.6E-09 | -1.8 | 2.7E-10 | -1.7 | 0.31 |
| IGFBP5    | -1.7 | 4.6E-11 | -1.7 | 2.7E-11 | -1.7 | 0.31 |
| ARID5A    | -1.7 | 1.2E-10 | -1.8 | 1.9E-11 | -1.7 | 0.31 |
| REG3G     | -1.6 | 5.9E-05 | -1.8 | 7.2E-07 | -1.7 | 0.31 |
| GMPR      | -1.9 | 3.3E-12 | -1.6 | 4.1E-10 | -1.7 | 0.31 |
| ADRA1B    | -1.8 | 4.6E-11 | -1.6 | 3.8E-10 | -1.7 | 0.31 |
| LMCD1     | -1.6 | 9.7E-11 | -1.8 | 1.0E-11 | -1.7 | 0.31 |
| AOX1      | -1.7 | 9.2E-11 | -1.8 | 1.2E-11 | -1.7 | 0.31 |
| ISG20L2   | -1.7 | 2.3E-10 | -1.7 | 6.3E-11 | -1.7 | 0.31 |
| NMI       | -1.8 | 4.7E-12 | -1.6 | 2.5E-10 | -1.7 | 0.31 |
| P2RY2     | -1.8 | 2.4E-10 | -1.7 | 7.0E-10 | -1.7 | 0.30 |
| SGCE      | -1.7 | 2.0E-11 | -1.7 | 4.5E-11 | -1.7 | 0.30 |
| POP4      | -1.9 | 2.9E-12 | -1.6 | 3.4E-10 | -1.7 | 0.30 |
| TRIM21    | -1.8 | 1.7E-11 | -1.6 | 1.3E-10 | -1.7 | 0.30 |
| SH3BP5    | -1.7 | 2.5E-11 | -1.7 | 2.7E-11 | -1.7 | 0.30 |
| ZNF556    | -1.6 | 9.3E-10 | -1.8 | 2.4E-11 | -1.7 | 0.30 |
| EFS       | -1.7 | 7.1E-11 | -1.8 | 1.0E-11 | -1.7 | 0.30 |
| PTPRB     | -1.9 | 1.2E-10 | -1.6 | 1.1E-09 | -1.7 | 0.30 |
| BLM       | -1.7 | 2.3E-11 | -1.7 | 4.3E-11 | -1.7 | 0.30 |
| RAB27B    | -1.6 | 3.5E-05 | -1.8 | 1.4E-06 | -1.7 | 0.30 |
| PRSS23    | -1.7 | 1.8E-11 | -1.7 | 3.5E-11 | -1.7 | 0.30 |
| C1orf87   | -2.1 | 2.1E-06 | -1.3 | 7.7E-05 | -1.7 | 0.30 |
| LRRK1     | -1.7 | 1.7E-10 | -1.7 | 7.4E-11 | -1.7 | 0.30 |
| ST14      | -2.1 | 6.2E-14 | -1.3 | 2.3E-08 | -1.7 | 0.30 |
| CARD11    | -1.5 | 3.9E-06 | -1.9 | 2.8E-07 | -1.7 | 0.30 |
| C2orf15   | -1.7 | 4.9E-06 | -1.7 | 1.8E-06 | -1.7 | 0.30 |
| NUDT8     | -1.9 | 4.8E-12 | -1.6 | 2.6E-10 | -1.7 | 0.30 |
| HSD17B1   | -1.8 | 5.8E-12 | -1.6 | 9.7E-11 | -1.7 | 0.30 |
| ANXA11    | -1.9 | 2.3E-12 | -1.6 | 2.2E-10 | -1.7 | 0.30 |
| FXYD5     | -2.0 | 2.4E-13 | -1.4 | 3.4E-09 | -1.7 | 0.30 |
| C9orf125  | -1.8 | 1.5E-11 | -1.7 | 2.9E-11 | -1.7 | 0.30 |
| PRSS3     | -1.8 | 3.0E-11 | -1.7 | 3.2E-11 | -1.7 | 0.30 |
| SAA1      | -2.5 | 2.5E-14 | -1.0 | 2.2E-05 | -1.7 | 0.30 |
| FXYD3     | -1.8 | 9.8E-12 | -1.7 | 4.1E-11 | -1.7 | 0.30 |
| C10orf112 | -2.1 | 2.1E-07 | -1.4 | 2.8E-04 | -1.7 | 0.30 |
| FAR2      | -1.1 | 2.8E-05 | -2.4 | 9.9E-13 | -1.7 | 0.30 |
| GPRC5C    | -1.8 | 8.3E-12 | -1.7 | 4.3E-11 | -1.7 | 0.30 |
| ARSD      | -1.6 | 2.5E-07 | -1.9 | 1.7E-07 | -1.7 | 0.30 |
| TAGLN2    | -1.9 | 1.5E-12 | -1.6 | 2.5E-10 | -1.7 | 0.30 |
| ENPP1     | -1.6 | 3.0E-10 | -1.9 | 6.8E-12 | -1.7 | 0.30 |
| TLR5      | -1.8 | 5.5E-11 | -1.7 | 3.1E-10 | -1.7 | 0.30 |
| KCNE4     | -2.2 | 1.0E-12 | -1.3 | 1.2E-07 | -1.7 | 0.30 |
| SLC22A15  | -1.8 | 1.5E-10 | -1.7 | 6.0E-11 | -1.7 | 0.30 |
| C6orf192  | -1.7 | 2.3E-11 | -1.8 | 1.4E-11 | -1.7 | 0.30 |
| ULBP2     | -1.9 | 2.2E-10 | -1.6 | 4.9E-09 | -1.7 | 0.30 |
| CD151     | -1.4 | 2.3E-08 | -2.1 | 3.2E-13 | -1.7 | 0.30 |
| DIO3      | -1.7 | 8.6E-08 | -1.8 | 4.8E-08 | -1.7 | 0.30 |
| ERN1      | -1.9 | 5.7E-12 | -1.6 | 1.7E-10 | -1.8 | 0.30 |
| FASTKD2   | -2.0 | 2.3E-12 | -1.5 | 4.1E-09 | -1.8 | 0.30 |

|           |      |         |      |         |      |      |
|-----------|------|---------|------|---------|------|------|
| CDC42EP1  | -2.1 | 6.8E-13 | -1.4 | 3.6E-08 | -1.8 | 0.30 |
| AKR1B15   | -2.2 | 2.3E-13 | -1.3 | 1.1E-07 | -1.8 | 0.30 |
| SH3D19    | -1.7 | 3.3E-11 | -1.8 | 7.1E-12 | -1.8 | 0.30 |
| RAD54B    | -1.9 | 1.6E-06 | -1.6 | 6.5E-06 | -1.8 | 0.30 |
| LRCH3     | -2.1 | 3.3E-09 | -1.4 | 1.3E-06 | -1.8 | 0.30 |
| TTK       | -1.6 | 1.1E-09 | -1.9 | 4.5E-12 | -1.8 | 0.30 |
| DLEU2     | -1.5 | 1.9E-07 | -2.0 | 8.7E-11 | -1.8 | 0.30 |
| SMEK2     | -2.1 | 4.7E-11 | -1.4 | 5.3E-08 | -1.8 | 0.30 |
| RNASEL    | -1.7 | 7.2E-11 | -1.8 | 6.3E-12 | -1.8 | 0.30 |
| IER3      | -1.9 | 2.1E-12 | -1.6 | 9.0E-11 | -1.8 | 0.29 |
| KCTD12    | -1.6 | 1.0E-10 | -1.9 | 1.9E-12 | -1.8 | 0.29 |
| SMAD3     | -1.7 | 3.9E-11 | -1.8 | 5.2E-12 | -1.8 | 0.29 |
| IHH       | -2.0 | 3.1E-11 | -1.5 | 3.5E-09 | -1.8 | 0.29 |
| PRAP1     | -2.1 | 1.3E-13 | -1.5 | 2.8E-09 | -1.8 | 0.29 |
| LCK       | -2.3 | 6.9E-15 | -1.2 | 1.9E-07 | -1.8 | 0.29 |
| WNT3      | -1.9 | 2.9E-11 | -1.6 | 1.1E-09 | -1.8 | 0.29 |
| S100A11   | -2.0 | 5.1E-13 | -1.6 | 3.4E-10 | -1.8 | 0.29 |
| FAM135A   | -1.9 | 2.0E-07 | -1.6 | 4.9E-06 | -1.8 | 0.29 |
| GPR56     | -1.8 | 1.5E-11 | -1.8 | 8.6E-12 | -1.8 | 0.29 |
| PTPN13    | -1.8 | 1.6E-11 | -1.8 | 1.0E-11 | -1.8 | 0.29 |
| C11orf70  | -1.9 | 4.0E-10 | -1.7 | 5.5E-10 | -1.8 | 0.29 |
| PLA2R1    | -2.1 | 6.1E-08 | -1.5 | 1.8E-05 | -1.8 | 0.29 |
| SNAI2     | -1.7 | 4.4E-11 | -1.9 | 2.9E-12 | -1.8 | 0.29 |
| C8orf84   | -2.0 | 5.6E-11 | -1.6 | 7.5E-09 | -1.8 | 0.29 |
| SYK       | -1.8 | 9.0E-12 | -1.8 | 1.7E-11 | -1.8 | 0.29 |
| ATP8A1    | -1.8 | 9.5E-05 | -1.7 | 1.9E-04 | -1.8 | 0.29 |
| LAMB3     | -1.7 | 2.9E-11 | -1.8 | 3.6E-12 | -1.8 | 0.29 |
| KLF10     | -1.8 | 1.2E-11 | -1.8 | 9.3E-12 | -1.8 | 0.29 |
| HGD       | -2.1 | 1.6E-13 | -1.4 | 4.7E-09 | -1.8 | 0.29 |
| MAP3K5    | -1.8 | 4.9E-12 | -1.7 | 1.9E-11 | -1.8 | 0.29 |
| HPN       | -2.0 | 6.2E-13 | -1.6 | 2.2E-10 | -1.8 | 0.29 |
| EYA3      | -1.7 | 4.1E-09 | -1.8 | 2.0E-10 | -1.8 | 0.29 |
| SAT1      | -1.9 | 1.0E-12 | -1.6 | 9.2E-11 | -1.8 | 0.29 |
| KCNK3     | -2.2 | 2.2E-07 | -1.3 | 3.6E-04 | -1.8 | 0.29 |
| STAT5A    | -1.8 | 4.5E-11 | -1.8 | 4.8E-11 | -1.8 | 0.29 |
| TUBB2C    | -1.8 | 3.6E-12 | -1.7 | 2.4E-11 | -1.8 | 0.29 |
| KCTD5     | -2.1 | 3.4E-08 | -1.5 | 2.6E-06 | -1.8 | 0.29 |
| RTP4      | -1.7 | 5.5E-11 | -1.9 | 2.6E-12 | -1.8 | 0.29 |
| RNASET2   | -1.8 | 1.6E-11 | -1.8 | 5.0E-12 | -1.8 | 0.29 |
| CLU       | -1.9 | 8.4E-13 | -1.6 | 1.1E-10 | -1.8 | 0.29 |
| DNASE1L3  | -1.5 | 2.1E-07 | -2.1 | 9.6E-12 | -1.8 | 0.29 |
| ACP6      | -1.9 | 7.7E-12 | -1.7 | 1.2E-10 | -1.8 | 0.29 |
| MEIS2     | -1.8 | 1.1E-11 | -1.8 | 6.7E-12 | -1.8 | 0.29 |
| C17orf91  | -1.6 | 4.5E-10 | -2.0 | 3.0E-13 | -1.8 | 0.29 |
| IFIH1     | -1.8 | 7.4E-12 | -1.7 | 2.4E-11 | -1.8 | 0.29 |
| C8orf38   | -1.6 | 2.5E-09 | -2.0 | 1.2E-12 | -1.8 | 0.29 |
| C4B       | -1.9 | 1.2E-12 | -1.7 | 5.4E-11 | -1.8 | 0.29 |
| TOP2A     | -1.8 | 1.6E-11 | -1.8 | 4.3E-12 | -1.8 | 0.29 |
| SLC27A2   | -1.3 | 4.0E-06 | -2.3 | 1.3E-12 | -1.8 | 0.29 |
| CLIC2     | -1.7 | 3.9E-09 | -1.9 | 1.5E-11 | -1.8 | 0.29 |
| PLA2G2A   | -1.9 | 5.1E-11 | -1.7 | 2.6E-10 | -1.8 | 0.29 |
| EFCAB6    | -1.6 | 1.4E-04 | -2.0 | 5.4E-05 | -1.8 | 0.29 |
| SDSL      | -1.7 | 4.5E-11 | -1.9 | 1.8E-12 | -1.8 | 0.29 |
| TMPRSS13  | -1.9 | 5.9E-11 | -1.7 | 4.4E-10 | -1.8 | 0.29 |
| ISLR      | -1.9 | 2.2E-12 | -1.7 | 1.8E-11 | -1.8 | 0.29 |
| C10orf116 | -1.8 | 4.4E-12 | -1.8 | 8.9E-12 | -1.8 | 0.29 |
| ABT1      | -1.9 | 2.7E-10 | -1.7 | 1.5E-09 | -1.8 | 0.28 |
| CDH1      | -1.7 | 5.8E-11 | -2.0 | 7.0E-13 | -1.8 | 0.28 |
| TLR4      | -2.5 | 2.5E-08 | -1.2 | 1.0E-04 | -1.8 | 0.28 |
| PYDC1     | -1.8 | 7.8E-07 | -1.8 | 3.0E-08 | -1.8 | 0.28 |
| RNF180    | -2.1 | 1.2E-06 | -1.5 | 2.0E-04 | -1.8 | 0.28 |
| BMP6      | -1.8 | 2.0E-11 | -1.8 | 6.7E-12 | -1.8 | 0.28 |

|            |      |         |      |         |      |      |
|------------|------|---------|------|---------|------|------|
| FAM189A2   | -1.7 | 2.4E-11 | -1.9 | 1.6E-12 | -1.8 | 0.28 |
| BBX        | -1.9 | 1.7E-12 | -1.7 | 2.4E-11 | -1.8 | 0.28 |
| NAP1L2     | -2.4 | 8.9E-12 | -1.3 | 1.2E-06 | -1.8 | 0.28 |
| FBN1       | -1.8 | 4.7E-12 | -1.8 | 6.7E-12 | -1.8 | 0.28 |
| SLC24A6    | -2.0 | 3.7E-13 | -1.6 | 1.1E-10 | -1.8 | 0.28 |
| STK17B     | -1.8 | 7.1E-11 | -1.9 | 6.8E-12 | -1.8 | 0.28 |
| COL13A1    | -2.6 | 2.7E-09 | -1.1 | 8.4E-05 | -1.8 | 0.28 |
| UBA7       | -1.9 | 5.0E-11 | -1.7 | 4.1E-10 | -1.8 | 0.28 |
| GK         | -1.5 | 1.7E-09 | -2.1 | 1.4E-13 | -1.8 | 0.28 |
| GALNT7     | -1.9 | 4.6E-12 | -1.8 | 8.7E-12 | -1.8 | 0.28 |
| SUV39H1    | -2.0 | 1.2E-06 | -1.7 | 3.1E-06 | -1.8 | 0.28 |
| PTPRN2     | -2.1 | 1.7E-13 | -1.5 | 8.3E-10 | -1.8 | 0.28 |
| PRSS27     | -1.8 | 2.2E-05 | -1.9 | 1.7E-05 | -1.8 | 0.28 |
| CTTNBP2    | -1.7 | 1.8E-06 | -2.0 | 2.3E-09 | -1.8 | 0.28 |
| GZMH       | -2.0 | 3.1E-07 | -1.6 | 1.3E-07 | -1.8 | 0.28 |
| NME5       | -1.5 | 4.2E-07 | -2.1 | 2.2E-11 | -1.8 | 0.28 |
| CD244      | -2.4 | 3.6E-09 | -1.3 | 3.0E-04 | -1.8 | 0.28 |
| C10orf125  | -1.8 | 7.3E-12 | -1.9 | 2.6E-12 | -1.8 | 0.28 |
| QPCT       | -1.8 | 9.5E-12 | -1.8 | 4.6E-12 | -1.8 | 0.28 |
| SIX1       | -1.9 | 1.7E-12 | -1.7 | 2.1E-11 | -1.8 | 0.28 |
| ATP6V0A4   | -2.0 | 6.2E-07 | -1.7 | 8.7E-06 | -1.8 | 0.28 |
| NAPRT1     | -1.9 | 2.4E-12 | -1.8 | 7.0E-12 | -1.8 | 0.28 |
| SULT1C4    | -2.6 | 6.7E-09 | -1.1 | 3.6E-04 | -1.8 | 0.28 |
| LAG3       | -1.8 | 1.7E-11 | -1.9 | 1.2E-12 | -1.8 | 0.28 |
| AFAP1L2    | -1.6 | 1.5E-10 | -2.0 | 2.0E-13 | -1.8 | 0.28 |
| DNAJB12    | -1.9 | 4.4E-12 | -1.8 | 8.7E-12 | -1.8 | 0.28 |
| TIPARP     | -1.9 | 2.7E-12 | -1.8 | 5.2E-12 | -1.8 | 0.28 |
| NCAPH      | -1.8 | 3.9E-12 | -1.8 | 3.9E-12 | -1.8 | 0.28 |
| ADCK3      | -2.0 | 7.5E-13 | -1.7 | 2.2E-11 | -1.8 | 0.28 |
| SOX2       | -1.9 | 6.0E-12 | -1.8 | 7.8E-12 | -1.8 | 0.28 |
| CDH11      | -1.9 | 1.9E-12 | -1.8 | 6.3E-12 | -1.8 | 0.28 |
| SLC25A40   | -1.8 | 1.3E-08 | -1.9 | 1.5E-09 | -1.8 | 0.28 |
| CCR2       | -1.7 | 4.0E-04 | -2.0 | 7.0E-05 | -1.8 | 0.28 |
| TRH        | -2.1 | 1.4E-11 | -1.6 | 1.0E-08 | -1.9 | 0.28 |
| NFIL3      | -2.0 | 3.0E-13 | -1.7 | 4.3E-11 | -1.9 | 0.28 |
| LIF        | -2.4 | 1.2E-12 | -1.3 | 2.5E-07 | -1.9 | 0.28 |
| IL6ST      | -1.6 | 3.5E-09 | -2.1 | 2.4E-12 | -1.9 | 0.28 |
| SEMA6A     | -2.0 | 5.8E-13 | -1.7 | 2.0E-11 | -1.9 | 0.28 |
| NTF3       | -1.9 | 2.1E-12 | -1.8 | 1.8E-11 | -1.9 | 0.28 |
| ZNF516     | -1.8 | 2.1E-11 | -1.9 | 3.9E-12 | -1.9 | 0.28 |
| LACTB2     | -1.6 | 3.2E-10 | -2.1 | 5.4E-14 | -1.9 | 0.28 |
| DENND1B    | -2.2 | 6.5E-12 | -1.6 | 2.8E-09 | -1.9 | 0.28 |
| ZC3H12A    | -2.1 | 1.5E-13 | -1.7 | 8.2E-11 | -1.9 | 0.28 |
| ANLN       | -1.9 | 1.3E-12 | -1.8 | 9.3E-12 | -1.9 | 0.28 |
| IL20RB     | -2.2 | 1.3E-13 | -1.6 | 6.8E-10 | -1.9 | 0.28 |
| FIGNL1     | -1.8 | 1.9E-09 | -1.9 | 1.4E-10 | -1.9 | 0.28 |
| PPM1H      | -2.3 | 2.3E-12 | -1.4 | 1.1E-07 | -1.9 | 0.28 |
| POLE2      | -2.0 | 2.3E-12 | -1.7 | 1.4E-10 | -1.9 | 0.27 |
| FGF13      | -1.9 | 4.9E-12 | -1.8 | 1.0E-11 | -1.9 | 0.27 |
| FXYD1      | -1.9 | 4.1E-11 | -1.8 | 7.8E-11 | -1.9 | 0.27 |
| CCDC3      | -1.9 | 9.5E-13 | -1.8 | 7.8E-12 | -1.9 | 0.27 |
| GATA5      | -1.8 | 1.9E-07 | -1.9 | 1.8E-09 | -1.9 | 0.27 |
| SENP2      | -1.8 | 3.8E-11 | -1.9 | 3.7E-12 | -1.9 | 0.27 |
| EFEMP1     | -1.8 | 4.2E-12 | -1.9 | 1.4E-12 | -1.9 | 0.27 |
| EPHA2      | -2.2 | 8.2E-12 | -1.6 | 3.1E-08 | -1.9 | 0.27 |
| FOXP1      | -1.9 | 2.7E-12 | -1.9 | 2.1E-12 | -1.9 | 0.27 |
| CSGALNACT1 | -1.8 | 7.0E-12 | -1.9 | 8.8E-13 | -1.9 | 0.27 |
| ZNF618     | -2.0 | 6.0E-13 | -1.8 | 1.1E-11 | -1.9 | 0.27 |
| RUNDC3B    | -1.9 | 5.6E-10 | -1.8 | 1.8E-10 | -1.9 | 0.27 |
| SKAP1      | -1.8 | 8.1E-12 | -1.9 | 1.7E-12 | -1.9 | 0.27 |
| PPP1R15A   | -2.1 | 7.8E-14 | -1.6 | 1.4E-10 | -1.9 | 0.27 |
| COL24A1    | -2.1 | 1.1E-06 | -1.6 | 3.1E-06 | -1.9 | 0.27 |

|          |      |         |      |         |      |      |
|----------|------|---------|------|---------|------|------|
| FAM198A  | -2.4 | 3.2E-11 | -1.4 | 6.8E-07 | -1.9 | 0.27 |
| HERC6    | -2.0 | 4.4E-13 | -1.7 | 3.2E-11 | -1.9 | 0.27 |
| S100A3   | -1.6 | 1.8E-09 | -2.2 | 1.1E-13 | -1.9 | 0.27 |
| C7orf58  | -2.5 | 8.4E-11 | -1.3 | 2.6E-06 | -1.9 | 0.27 |
| TLE4     | -1.7 | 1.4E-09 | -2.0 | 1.0E-11 | -1.9 | 0.27 |
| TRIM56   | -1.9 | 1.7E-12 | -1.9 | 2.7E-12 | -1.9 | 0.27 |
| PAM      | -1.8 | 4.7E-12 | -1.9 | 7.6E-13 | -1.9 | 0.27 |
| GJB6     | -1.9 | 1.5E-10 | -1.9 | 3.7E-10 | -1.9 | 0.27 |
| SIGLEC11 | -2.0 | 3.8E-13 | -1.8 | 9.8E-12 | -1.9 | 0.27 |
| CHRM2    | -1.8 | 7.1E-10 | -2.0 | 4.5E-12 | -1.9 | 0.27 |
| SLC19A2  | -2.0 | 2.9E-13 | -1.8 | 1.2E-11 | -1.9 | 0.27 |
| CBR3     | -1.9 | 8.0E-13 | -1.8 | 3.7E-12 | -1.9 | 0.27 |
| NFATC1   | -1.8 | 5.4E-12 | -2.0 | 6.2E-13 | -1.9 | 0.27 |
| KRT19    | -1.8 | 3.3E-12 | -1.9 | 8.6E-13 | -1.9 | 0.27 |
| PAPSS2   | -1.8 | 4.5E-12 | -1.9 | 8.2E-13 | -1.9 | 0.27 |
| PFKL     | -2.3 | 1.7E-11 | -1.5 | 2.2E-07 | -1.9 | 0.27 |
| PFKM     | -2.3 | 1.7E-11 | -1.5 | 2.2E-07 | -1.9 | 0.27 |
| PALLD    | -1.9 | 1.1E-12 | -1.9 | 2.3E-12 | -1.9 | 0.27 |
| LTBP2    | -2.0 | 4.6E-11 | -1.8 | 6.6E-10 | -1.9 | 0.27 |
| USP43    | -2.4 | 2.4E-07 | -1.4 | 6.5E-05 | -1.9 | 0.27 |
| BST1     | -1.9 | 7.9E-11 | -1.9 | 1.2E-11 | -1.9 | 0.27 |
| C1QTNF9  | -2.2 | 7.8E-08 | -1.6 | 6.6E-07 | -1.9 | 0.27 |
| MTUS1    | -1.9 | 2.3E-12 | -1.9 | 4.9E-12 | -1.9 | 0.27 |
| CORO1A   | -2.1 | 3.0E-13 | -1.7 | 1.2E-10 | -1.9 | 0.27 |
| TCEA3    | -2.1 | 8.9E-14 | -1.7 | 3.2E-11 | -1.9 | 0.27 |
| PRDX4    | -2.0 | 1.9E-13 | -1.8 | 1.1E-11 | -1.9 | 0.27 |
| SLPI     | -2.1 | 8.7E-14 | -1.7 | 2.3E-11 | -1.9 | 0.27 |
| CGN      | -1.8 | 4.0E-12 | -2.0 | 4.7E-13 | -1.9 | 0.27 |
| CFH      | -1.9 | 1.0E-12 | -1.9 | 1.6E-12 | -1.9 | 0.27 |
| SP140L   | -2.4 | 5.8E-07 | -1.4 | 4.6E-04 | -1.9 | 0.27 |
| ZNF214   | -2.1 | 7.2E-09 | -1.7 | 6.2E-09 | -1.9 | 0.27 |
| NMU      | -2.0 | 2.9E-13 | -1.8 | 7.8E-12 | -1.9 | 0.26 |
| FRZB     | -2.0 | 7.1E-13 | -1.9 | 2.2E-12 | -1.9 | 0.26 |
| SEC16B   | -2.0 | 5.9E-12 | -1.9 | 4.5E-12 | -1.9 | 0.26 |
| CAV1     | -1.7 | 2.0E-11 | -2.1 | 8.6E-14 | -1.9 | 0.26 |
| GBGT1    | -2.4 | 4.8E-04 | -1.4 | 7.6E-04 | -1.9 | 0.26 |
| CYP27A1  | -1.8 | 9.4E-10 | -2.0 | 3.7E-11 | -1.9 | 0.26 |
| DDX60    | -1.8 | 4.0E-11 | -2.0 | 4.2E-13 | -1.9 | 0.26 |
| C1RL     | -1.9 | 1.1E-11 | -2.0 | 1.0E-12 | -1.9 | 0.26 |
| DPP7     | -2.1 | 1.7E-13 | -1.8 | 1.2E-11 | -1.9 | 0.26 |
| NUDT10   | -1.9 | 1.1E-12 | -1.9 | 1.4E-12 | -1.9 | 0.26 |
| GIMAP1   | -1.8 | 4.1E-07 | -2.0 | 2.7E-09 | -1.9 | 0.26 |
| FAM107A  | -2.2 | 7.4E-13 | -1.6 | 1.5E-09 | -1.9 | 0.26 |
| CLEC3B   | -2.0 | 7.1E-13 | -1.9 | 1.5E-12 | -1.9 | 0.26 |
| RFC4     | -2.0 | 6.5E-13 | -1.9 | 1.6E-12 | -1.9 | 0.26 |
| EPS8L2   | -1.9 | 3.5E-12 | -2.0 | 5.8E-13 | -1.9 | 0.26 |
| C1orf21  | -2.0 | 3.1E-12 | -1.8 | 9.4E-12 | -1.9 | 0.26 |
| RASSF4   | -2.1 | 2.1E-13 | -1.7 | 7.0E-11 | -1.9 | 0.26 |
| CYP19A1  | -2.2 | 1.7E-06 | -1.6 | 1.9E-05 | -1.9 | 0.26 |
| CHPF     | -2.4 | 4.6E-15 | -1.4 | 5.7E-09 | -1.9 | 0.26 |
| NFKBIE   | -1.9 | 2.2E-12 | -2.0 | 4.9E-13 | -1.9 | 0.26 |
| CORO1B   | -1.9 | 8.7E-12 | -2.0 | 2.6E-12 | -1.9 | 0.26 |
| PRKG1    | -2.0 | 6.0E-06 | -1.8 | 1.5E-05 | -1.9 | 0.26 |
| FAM129B  | -1.9 | 1.9E-12 | -2.0 | 4.3E-13 | -1.9 | 0.26 |
| TPRN     | -2.2 | 1.0E-11 | -1.7 | 2.3E-09 | -1.9 | 0.26 |
| GBP1     | -1.7 | 1.1E-10 | -2.2 | 4.9E-14 | -1.9 | 0.26 |
| TBC1D8B  | -2.0 | 4.2E-11 | -1.9 | 4.0E-11 | -1.9 | 0.26 |
| ARHGAP10 | -1.9 | 4.9E-12 | -2.0 | 5.7E-13 | -1.9 | 0.26 |
| KLF5     | -2.1 | 1.6E-13 | -1.8 | 5.2E-12 | -1.9 | 0.26 |
| REGL     | -2.2 | 9.0E-14 | -1.7 | 6.7E-11 | -1.9 | 0.26 |
| AURKB    | -2.5 | 4.9E-10 | -1.4 | 1.2E-05 | -1.9 | 0.26 |
| MXD1     | -2.1 | 1.3E-08 | -1.8 | 2.4E-08 | -1.9 | 0.26 |

|          |      |         |      |         |      |      |
|----------|------|---------|------|---------|------|------|
| HOXB9    | -2.2 | 1.7E-13 | -1.7 | 4.1E-11 | -1.9 | 0.26 |
| SILV     | -1.8 | 1.4E-10 | -2.1 | 3.5E-12 | -1.9 | 0.26 |
| FGFR2    | -2.0 | 3.0E-13 | -1.9 | 4.1E-12 | -2.0 | 0.26 |
| EZR      | -1.9 | 7.9E-13 | -2.0 | 6.5E-13 | -2.0 | 0.26 |
| HLA-G    | -2.1 | 1.0E-13 | -1.8 | 5.4E-12 | -2.0 | 0.26 |
| CCR7     | -1.8 | 3.1E-10 | -2.1 | 4.2E-13 | -2.0 | 0.26 |
| MTHFD1L  | -2.1 | 3.2E-13 | -1.8 | 4.6E-12 | -2.0 | 0.26 |
| NAALADL1 | -1.5 | 9.6E-05 | -2.4 | 9.6E-07 | -2.0 | 0.26 |
| COL12A1  | -2.0 | 7.2E-13 | -2.0 | 5.6E-13 | -2.0 | 0.26 |
| BPI      | -2.4 | 7.9E-10 | -1.5 | 5.8E-08 | -2.0 | 0.26 |
| CA4      | -2.0 | 2.4E-11 | -1.9 | 6.1E-11 | -2.0 | 0.26 |
| ADRB2    | -2.4 | 8.0E-12 | -1.6 | 5.7E-09 | -2.0 | 0.26 |
| GNG11    | -2.0 | 2.8E-13 | -1.9 | 1.3E-12 | -2.0 | 0.26 |
| DDIT4L   | -2.0 | 3.4E-11 | -1.9 | 1.9E-11 | -2.0 | 0.26 |
| TRIM34   | -1.9 | 1.6E-10 | -2.0 | 2.4E-11 | -2.0 | 0.26 |
| CCDC101  | -2.1 | 4.7E-12 | -1.9 | 1.7E-11 | -2.0 | 0.26 |
| SFN      | -2.3 | 8.7E-15 | -1.7 | 6.5E-11 | -2.0 | 0.26 |
| GCNT3    | -2.1 | 4.6E-13 | -1.9 | 5.4E-12 | -2.0 | 0.26 |
| ASS1     | -2.1 | 5.6E-14 | -1.8 | 5.9E-12 | -2.0 | 0.26 |
| NOSTRIN  | -1.9 | 1.3E-12 | -2.0 | 2.5E-13 | -2.0 | 0.25 |
| NAMPT    | -1.9 | 1.1E-12 | -2.0 | 2.7E-13 | -2.0 | 0.25 |
| FUT5     | -2.0 | 2.4E-12 | -1.9 | 3.0E-12 | -2.0 | 0.25 |
| CD3G     | -1.7 | 2.7E-06 | -2.2 | 8.4E-09 | -2.0 | 0.25 |
| DOCK10   | -2.1 | 2.6E-13 | -1.9 | 2.1E-12 | -2.0 | 0.25 |
| EPB41L4B | -2.1 | 8.0E-14 | -1.8 | 4.6E-12 | -2.0 | 0.25 |
| MTRR     | -1.9 | 1.1E-12 | -2.0 | 3.6E-13 | -2.0 | 0.25 |
| EPSTI1   | -1.7 | 3.6E-10 | -2.3 | 2.3E-14 | -2.0 | 0.25 |
| SERPINA5 | -2.1 | 1.1E-13 | -1.9 | 3.6E-12 | -2.0 | 0.25 |
| MAP3K13  | -1.9 | 8.0E-12 | -2.1 | 2.4E-13 | -2.0 | 0.25 |
| NR1D2    | -1.8 | 1.7E-11 | -2.1 | 1.0E-13 | -2.0 | 0.25 |
| TSHZ3    | -2.1 | 6.7E-14 | -1.8 | 4.0E-12 | -2.0 | 0.25 |
| FMOD     | -1.9 | 7.3E-13 | -2.0 | 2.9E-13 | -2.0 | 0.25 |
| PLCB1    | -2.1 | 1.7E-11 | -1.9 | 7.9E-11 | -2.0 | 0.25 |
| C9orf167 | -2.1 | 1.6E-13 | -1.9 | 1.2E-12 | -2.0 | 0.25 |
| FHL2     | -2.2 | 1.9E-14 | -1.8 | 1.3E-11 | -2.0 | 0.25 |
| RAB7B    | -2.3 | 2.3E-10 | -1.7 | 3.5E-08 | -2.0 | 0.25 |
| CYP2C18  | -2.0 | 5.8E-10 | -2.0 | 1.5E-10 | -2.0 | 0.25 |
| NKD1     | -2.1 | 2.4E-13 | -1.8 | 1.0E-11 | -2.0 | 0.25 |
| CHST15   | -2.1 | 1.3E-13 | -1.9 | 1.3E-12 | -2.0 | 0.25 |
| ADH1B    | -2.2 | 6.7E-14 | -1.8 | 8.5E-12 | -2.0 | 0.25 |
| CADM1    | -2.1 | 1.5E-13 | -1.9 | 1.2E-12 | -2.0 | 0.25 |
| PDZK1    | -1.8 | 6.4E-10 | -2.2 | 1.5E-12 | -2.0 | 0.25 |
| MAMDC2   | -2.1 | 3.0E-13 | -1.9 | 6.8E-12 | -2.0 | 0.25 |
| ETV7     | -1.9 | 1.7E-11 | -2.0 | 5.5E-13 | -2.0 | 0.25 |
| SMOC1    | -2.4 | 2.0E-04 | -1.5 | 4.6E-04 | -2.0 | 0.25 |
| C18orf18 | -2.1 | 2.4E-10 | -1.9 | 1.1E-10 | -2.0 | 0.25 |
| ANKH     | -1.9 | 2.4E-09 | -2.0 | 1.6E-10 | -2.0 | 0.25 |
| CEACAM5  | -2.3 | 8.5E-15 | -1.7 | 3.3E-11 | -2.0 | 0.25 |
| RBP4     | -2.1 | 5.5E-14 | -1.9 | 2.8E-12 | -2.0 | 0.25 |
| KRT5     | -2.3 | 8.5E-15 | -1.7 | 2.2E-11 | -2.0 | 0.25 |
| KIF20B   | -2.1 | 1.2E-11 | -2.0 | 4.8E-11 | -2.0 | 0.25 |
| HES6     | -2.7 | 1.9E-09 | -1.3 | 2.3E-04 | -2.0 | 0.25 |
| TST      | -2.1 | 1.2E-13 | -1.9 | 9.3E-13 | -2.0 | 0.25 |
| SPRR2C   | -2.3 | 6.1E-15 | -1.7 | 3.0E-11 | -2.0 | 0.25 |
| PER2     | -2.0 | 6.6E-13 | -2.0 | 1.8E-13 | -2.0 | 0.25 |
| GSTT1    | -2.2 | 7.4E-14 | -1.8 | 1.1E-11 | -2.0 | 0.25 |
| CBLN4    | -2.6 | 2.9E-07 | -1.4 | 3.8E-04 | -2.0 | 0.25 |
| TSPYL2   | -2.8 | 5.7E-10 | -1.3 | 2.7E-04 | -2.0 | 0.25 |
| ART5     | -2.4 | 1.3E-04 | -1.7 | 7.8E-11 | -2.0 | 0.25 |
| MAPK13   | -2.3 | 2.2E-13 | -1.7 | 1.7E-10 | -2.0 | 0.25 |
| NAGLU    | -2.0 | 2.2E-13 | -2.0 | 4.9E-13 | -2.0 | 0.25 |
| MKI67    | -2.0 | 2.8E-13 | -2.0 | 3.6E-13 | -2.0 | 0.25 |

|           |      |         |      |         |      |      |
|-----------|------|---------|------|---------|------|------|
| EDN2      | -2.2 | 5.1E-08 | -1.9 | 1.5E-07 | -2.0 | 0.25 |
| RFTN2     | -2.0 | 1.9E-11 | -2.1 | 6.7E-13 | -2.0 | 0.25 |
| KCNE3     | -2.2 | 2.6E-14 | -1.8 | 4.0E-12 | -2.0 | 0.25 |
| C10orf11  | -1.9 | 2.2E-11 | -2.1 | 1.4E-13 | -2.0 | 0.25 |
| MACROD1   | -2.2 | 1.0E-13 | -1.8 | 1.6E-11 | -2.0 | 0.25 |
| CCDC19    | -1.9 | 6.4E-07 | -2.1 | 1.0E-06 | -2.0 | 0.25 |
| ANKRD5    | -2.2 | 6.1E-05 | -1.8 | 5.9E-04 | -2.0 | 0.25 |
| MBNL2     | -2.3 | 2.7E-11 | -1.8 | 3.7E-10 | -2.0 | 0.25 |
| IL20RA    | -1.9 | 7.9E-12 | -2.1 | 3.1E-13 | -2.0 | 0.25 |
| NES       | -2.3 | 3.4E-14 | -1.8 | 1.7E-11 | -2.0 | 0.25 |
| C21orf62  | -1.8 | 8.9E-09 | -2.3 | 2.6E-11 | -2.0 | 0.25 |
| LMNA      | -2.2 | 2.5E-14 | -1.9 | 3.1E-12 | -2.0 | 0.25 |
| VCAM1     | -2.0 | 7.3E-13 | -2.1 | 9.5E-14 | -2.0 | 0.25 |
| PTPRE     | -2.0 | 1.2E-12 | -2.1 | 2.7E-13 | -2.0 | 0.25 |
| DERL3     | -2.1 | 1.9E-13 | -2.0 | 1.1E-12 | -2.0 | 0.25 |
| HLA-DRB4  | -2.3 | 8.5E-08 | -1.7 | 2.8E-07 | -2.0 | 0.25 |
| ALDH2     | -2.0 | 6.8E-13 | -2.1 | 7.7E-14 | -2.0 | 0.25 |
| MAP7      | -2.2 | 2.9E-14 | -1.9 | 2.4E-12 | -2.0 | 0.25 |
| C20orf196 | -2.6 | 1.9E-05 | -1.5 | 2.1E-04 | -2.0 | 0.24 |
| ANGPT1    | -2.0 | 8.8E-11 | -2.0 | 1.0E-11 | -2.0 | 0.24 |
| ST6GAL1   | -2.8 | 1.7E-12 | -1.3 | 8.6E-07 | -2.0 | 0.24 |
| MCM10     | -2.3 | 3.1E-13 | -1.8 | 8.2E-11 | -2.0 | 0.24 |
| SLC30A1   | -2.1 | 2.0E-13 | -2.0 | 4.2E-13 | -2.0 | 0.24 |
| CISH      | -2.1 | 1.3E-13 | -2.0 | 4.1E-13 | -2.0 | 0.24 |
| C14orf50  | -1.5 | 2.0E-04 | -2.5 | 4.6E-09 | -2.0 | 0.24 |
| LGALS7    | -2.2 | 1.7E-13 | -1.8 | 1.1E-11 | -2.0 | 0.24 |
| ZNF521    | -1.9 | 1.4E-12 | -2.2 | 4.5E-14 | -2.0 | 0.24 |
| ULBP2     | -2.3 | 1.9E-11 | -1.8 | 1.0E-09 | -2.0 | 0.24 |
| INPP4B    | -2.1 | 1.8E-13 | -1.9 | 1.5E-12 | -2.0 | 0.24 |
| PDGFD     | -2.0 | 8.4E-12 | -2.1 | 4.1E-13 | -2.0 | 0.24 |
| ZEB2      | -2.2 | 1.4E-14 | -1.9 | 3.3E-12 | -2.0 | 0.24 |
| PLEK2     | -2.2 | 2.4E-14 | -1.9 | 1.5E-12 | -2.0 | 0.24 |
| C13orf31  | -1.8 | 1.3E-08 | -2.3 | 2.1E-12 | -2.1 | 0.24 |
| ICAM2     | -2.0 | 3.9E-13 | -2.1 | 7.2E-14 | -2.1 | 0.24 |
| HNMT      | -2.0 | 3.1E-13 | -2.1 | 1.1E-13 | -2.1 | 0.24 |
| AZGP1     | -2.4 | 3.9E-15 | -1.7 | 2.3E-11 | -2.1 | 0.24 |
| AMACR     | -2.2 | 2.9E-14 | -1.9 | 3.9E-12 | -2.1 | 0.24 |
| ICA1      | -2.0 | 3.4E-13 | -2.1 | 7.8E-14 | -2.1 | 0.24 |
| FOXD1     | -1.8 | 4.9E-10 | -2.3 | 1.3E-13 | -2.1 | 0.24 |
| EXPH5     | -2.1 | 1.0E-13 | -2.0 | 3.3E-13 | -2.1 | 0.24 |
| FCRL5     | -2.1 | 3.2E-09 | -2.0 | 2.1E-10 | -2.1 | 0.24 |
| SEPP1     | -1.9 | 8.5E-13 | -2.2 | 3.1E-14 | -2.1 | 0.24 |
| SLC12A2   | -2.1 | 3.4E-13 | -2.0 | 4.9E-13 | -2.1 | 0.24 |
| NCALD     | -1.8 | 9.1E-11 | -2.3 | 1.4E-14 | -2.1 | 0.24 |
| BRCA1     | -2.1 | 1.1E-13 | -2.0 | 5.3E-13 | -2.1 | 0.24 |
| KRT1      | -2.9 | 1.2E-06 | -1.2 | 3.0E-04 | -2.1 | 0.24 |
| SULT2B1   | -2.8 | 4.6E-09 | -1.3 | 2.1E-04 | -2.1 | 0.24 |
| MOCOS     | -2.7 | 2.3E-14 | -1.4 | 1.3E-08 | -2.1 | 0.24 |
| VPRBP     | -2.6 | 1.2E-07 | -1.6 | 1.2E-05 | -2.1 | 0.24 |
| BUB1      | -2.0 | 6.9E-13 | -2.1 | 5.3E-14 | -2.1 | 0.24 |
| ITGA8     | -2.2 | 1.0E-09 | -2.0 | 2.9E-09 | -2.1 | 0.24 |
| OVOL2     | -2.2 | 5.1E-14 | -2.0 | 5.9E-13 | -2.1 | 0.24 |
| NOXA1     | -2.2 | 3.9E-14 | -2.0 | 5.9E-13 | -2.1 | 0.24 |
| NRIP1     | -2.0 | 3.1E-13 | -2.1 | 6.3E-14 | -2.1 | 0.24 |
| AIG1      | -2.0 | 3.9E-13 | -2.2 | 4.2E-14 | -2.1 | 0.24 |
| IGLV2-14  | -2.5 | 2.4E-14 | -1.6 | 1.1E-09 | -2.1 | 0.24 |
| SERPINB2  | -2.4 | 4.1E-15 | -1.8 | 1.4E-11 | -2.1 | 0.24 |
| GPR20     | -1.9 | 2.8E-12 | -2.2 | 3.6E-14 | -2.1 | 0.24 |
| PLBD1     | -2.1 | 1.1E-13 | -2.1 | 1.3E-13 | -2.1 | 0.24 |
| SYNE1     | -2.1 | 1.3E-13 | -2.1 | 1.3E-13 | -2.1 | 0.24 |
| PSMB8     | -2.2 | 1.9E-14 | -1.9 | 1.1E-12 | -2.1 | 0.24 |
| FBXL13    | -2.3 | 1.9E-08 | -1.9 | 2.7E-07 | -2.1 | 0.24 |

|          |      |         |      |         |      |      |
|----------|------|---------|------|---------|------|------|
| AFAP1AS  | -2.6 | 1.7E-06 | -1.5 | 3.8E-04 | -2.1 | 0.24 |
| HIVEP2   | -2.1 | 9.7E-14 | -2.1 | 1.4E-13 | -2.1 | 0.24 |
| PLCB4    | -1.8 | 3.0E-09 | -2.3 | 2.2E-13 | -2.1 | 0.24 |
| TMEM184A | -2.2 | 4.3E-14 | -2.0 | 3.6E-13 | -2.1 | 0.24 |
| HPGDS    | -2.1 | 8.9E-08 | -2.0 | 5.5E-09 | -2.1 | 0.24 |
| IGKV1-5  | -2.4 | 2.3E-15 | -1.8 | 1.4E-11 | -2.1 | 0.24 |
| PYGB     | -2.0 | 5.4E-13 | -2.2 | 2.4E-14 | -2.1 | 0.24 |
| KLHL32   | -2.7 | 8.9E-07 | -1.5 | 8.5E-04 | -2.1 | 0.24 |
| IPO11    | -1.7 | 7.2E-09 | -2.4 | 2.2E-12 | -2.1 | 0.24 |
| CD38     | -2.6 | 1.4E-07 | -1.5 | 1.6E-04 | -2.1 | 0.24 |
| PLIN5    | -2.2 | 6.1E-14 | -2.0 | 1.0E-12 | -2.1 | 0.24 |
| ENOX1    | -2.3 | 2.8E-14 | -1.9 | 6.9E-12 | -2.1 | 0.24 |
| ICAM1    | -2.0 | 4.3E-13 | -2.2 | 5.3E-14 | -2.1 | 0.24 |
| RBMS3    | -2.3 | 2.6E-13 | -1.9 | 8.6E-12 | -2.1 | 0.24 |
| NCEH1    | -2.0 | 9.3E-13 | -2.2 | 4.2E-14 | -2.1 | 0.24 |
| HAND2    | -2.2 | 3.8E-14 | -2.0 | 2.8E-13 | -2.1 | 0.24 |
| MLC1     | -2.0 | 8.3E-10 | -2.1 | 6.6E-11 | -2.1 | 0.23 |
| PLS3     | -2.1 | 4.8E-14 | -2.0 | 1.8E-13 | -2.1 | 0.23 |
| EPHB3    | -2.2 | 7.3E-09 | -2.0 | 2.4E-08 | -2.1 | 0.23 |
| WFDC2    | -2.3 | 4.3E-15 | -1.9 | 3.1E-12 | -2.1 | 0.23 |
| ADAMTS1  | -2.1 | 1.0E-13 | -2.1 | 7.4E-14 | -2.1 | 0.23 |
| ANXA4    | -2.1 | 1.1E-13 | -2.1 | 5.8E-14 | -2.1 | 0.23 |
| S100A2   | -2.2 | 1.5E-14 | -2.0 | 4.5E-13 | -2.1 | 0.23 |
| CFHR3    | -2.1 | 1.4E-13 | -2.1 | 4.6E-14 | -2.1 | 0.23 |
| HSD17B8  | -2.2 | 4.1E-14 | -2.0 | 5.7E-13 | -2.1 | 0.23 |
| PDSS1    | -2.2 | 4.7E-14 | -2.1 | 1.9E-13 | -2.1 | 0.23 |
| EGR2     | -2.0 | 2.5E-13 | -2.2 | 2.9E-14 | -2.1 | 0.23 |
| CHL1     | -2.0 | 2.6E-11 | -2.2 | 2.3E-13 | -2.1 | 0.23 |
| EPPK1    | -2.2 | 2.7E-14 | -2.0 | 3.1E-13 | -2.1 | 0.23 |
| HSD11B2  | -2.1 | 5.8E-13 | -2.1 | 9.5E-14 | -2.1 | 0.23 |
| PSTPIP1  | -2.2 | 5.6E-14 | -2.0 | 4.7E-13 | -2.1 | 0.23 |
| PRKCDBP  | -2.2 | 1.1E-14 | -2.0 | 4.8E-13 | -2.1 | 0.23 |
| S100A13  | -2.2 | 1.7E-14 | -2.0 | 2.9E-13 | -2.1 | 0.23 |
| APOM     | -2.3 | 7.2E-14 | -1.9 | 3.0E-12 | -2.1 | 0.23 |
| PTN      | -2.1 | 1.8E-13 | -2.1 | 2.4E-13 | -2.1 | 0.23 |
| RRBP1    | -2.2 | 2.0E-14 | -2.0 | 2.7E-13 | -2.1 | 0.23 |
| RGMA     | -2.4 | 2.6E-15 | -1.9 | 2.6E-12 | -2.1 | 0.23 |
| GCNT1    | -2.2 | 4.5E-13 | -2.1 | 7.1E-13 | -2.1 | 0.23 |
| RASSF6   | -2.0 | 3.1E-04 | -2.2 | 2.0E-05 | -2.1 | 0.23 |
| GRASP    | -2.0 | 3.0E-13 | -2.2 | 1.4E-14 | -2.1 | 0.23 |
| NLRC5    | -2.0 | 2.4E-07 | -2.2 | 9.0E-10 | -2.1 | 0.23 |
| ILVBL    | -2.0 | 2.2E-13 | -2.2 | 2.0E-14 | -2.1 | 0.23 |
| LGI2     | -2.6 | 1.1E-13 | -1.7 | 1.1E-09 | -2.1 | 0.23 |
| ZNF385B  | -2.3 | 5.5E-15 | -1.9 | 8.1E-13 | -2.1 | 0.23 |
| KRT17    | -2.4 | 1.2E-15 | -1.8 | 5.0E-12 | -2.1 | 0.23 |
| KCNQ1    | -2.1 | 4.2E-14 | -2.1 | 7.8E-14 | -2.1 | 0.23 |
| CCNE1    | -2.2 | 1.2E-14 | -2.0 | 2.8E-13 | -2.1 | 0.23 |
| CCL26    | -2.1 | 1.1E-12 | -2.2 | 1.8E-13 | -2.1 | 0.23 |
| CDC45    | -2.0 | 2.1E-13 | -2.2 | 1.5E-14 | -2.1 | 0.23 |
| PGCP     | -2.1 | 6.6E-14 | -2.1 | 4.2E-14 | -2.1 | 0.23 |
| C9orf24  | -2.2 | 2.3E-13 | -2.1 | 2.0E-13 | -2.1 | 0.23 |
| SNX8     | -2.2 | 5.9E-13 | -2.0 | 4.6E-12 | -2.1 | 0.23 |
| PARVB    | -2.0 | 1.6E-11 | -2.3 | 1.3E-13 | -2.1 | 0.23 |
| RHOXF1   | -1.8 | 1.9E-07 | -2.4 | 9.9E-11 | -2.1 | 0.23 |
| GADD45A  | -2.1 | 6.6E-14 | -2.2 | 3.7E-14 | -2.1 | 0.23 |
| ERBB3    | -2.3 | 1.2E-14 | -1.9 | 1.6E-12 | -2.1 | 0.23 |
| SLC24A3  | -2.2 | 5.6E-14 | -2.1 | 7.1E-14 | -2.1 | 0.23 |
| OAF      | -2.7 | 2.9E-12 | -1.6 | 4.8E-07 | -2.1 | 0.23 |
| MXRA8    | -2.2 | 1.3E-14 | -2.1 | 1.6E-13 | -2.1 | 0.23 |
| RIPK3    | -2.7 | 1.1E-08 | -1.6 | 7.9E-05 | -2.1 | 0.23 |
| FLRT2    | -2.4 | 2.4E-15 | -1.9 | 1.7E-12 | -2.1 | 0.23 |
| NR1H4    | -2.4 | 2.0E-14 | -1.9 | 4.3E-12 | -2.1 | 0.23 |

|           |      |         |      |         |      |      |
|-----------|------|---------|------|---------|------|------|
| TK1       | -2.0 | 2.0E-13 | -2.3 | 9.6E-15 | -2.1 | 0.23 |
| ARHGAP18  | -2.0 | 8.9E-13 | -2.3 | 4.2E-15 | -2.2 | 0.22 |
| LHFP      | -2.2 | 3.0E-14 | -2.1 | 5.2E-14 | -2.2 | 0.22 |
| TSHZ2     | -2.0 | 1.2E-11 | -2.3 | 8.8E-14 | -2.2 | 0.22 |
| MIPEP     | -1.9 | 1.1E-11 | -2.4 | 5.6E-15 | -2.2 | 0.22 |
| PF4       | -2.9 | 1.3E-13 | -1.5 | 1.4E-07 | -2.2 | 0.22 |
| AREG      | -2.1 | 4.7E-14 | -2.2 | 2.6E-14 | -2.2 | 0.22 |
| CFB       | -2.1 | 1.9E-13 | -2.2 | 2.0E-14 | -2.2 | 0.22 |
| GMDS      | -2.0 | 1.4E-12 | -2.3 | 1.7E-14 | -2.2 | 0.22 |
| NR1D1     | -2.4 | 2.5E-08 | -2.0 | 2.3E-07 | -2.2 | 0.22 |
| RGL4      | -3.0 | 2.3E-08 | -1.4 | 3.3E-04 | -2.2 | 0.22 |
| LAMA2     | -2.2 | 3.2E-14 | -2.2 | 3.5E-14 | -2.2 | 0.22 |
| AP1M2     | -2.1 | 8.6E-12 | -2.3 | 1.9E-13 | -2.2 | 0.22 |
| DCN       | -2.3 | 7.5E-15 | -2.1 | 1.4E-13 | -2.2 | 0.22 |
| ACTL8     | -2.1 | 7.7E-10 | -2.3 | 2.2E-10 | -2.2 | 0.22 |
| KRTAP4-1  | -1.9 | 2.0E-09 | -2.5 | 1.2E-12 | -2.2 | 0.22 |
| KRTAP4-2  | -1.9 | 2.0E-09 | -2.5 | 1.2E-12 | -2.2 | 0.22 |
| KIT       | -2.3 | 1.2E-14 | -2.0 | 2.7E-13 | -2.2 | 0.22 |
| MEIS1     | -2.7 | 1.6E-05 | -1.7 | 2.0E-05 | -2.2 | 0.22 |
| FUT1      | -2.3 | 1.3E-13 | -2.0 | 1.7E-12 | -2.2 | 0.22 |
| PPARA     | -2.3 | 4.9E-14 | -2.1 | 2.0E-13 | -2.2 | 0.22 |
| ASPN      | -2.1 | 1.9E-13 | -2.3 | 9.8E-15 | -2.2 | 0.22 |
| MFSD6L    | -2.1 | 1.3E-12 | -2.3 | 3.7E-14 | -2.2 | 0.22 |
| TGM3      | -2.5 | 6.8E-10 | -1.8 | 7.4E-07 | -2.2 | 0.22 |
| SPAG9     | -2.3 | 3.8E-13 | -2.1 | 1.1E-12 | -2.2 | 0.22 |
| SLC25A13  | -2.3 | 4.5E-15 | -2.0 | 3.2E-13 | -2.2 | 0.22 |
| FAM46C    | -2.1 | 1.6E-09 | -2.3 | 1.2E-10 | -2.2 | 0.22 |
| C19orf2   | -2.3 | 3.9E-15 | -2.0 | 1.9E-13 | -2.2 | 0.22 |
| ESRP1     | -2.3 | 2.7E-14 | -2.1 | 3.7E-13 | -2.2 | 0.22 |
| LDHD      | -2.4 | 4.4E-15 | -2.0 | 4.3E-13 | -2.2 | 0.22 |
| MAGI2     | -2.4 | 5.4E-15 | -2.0 | 5.2E-13 | -2.2 | 0.22 |
| PRNP      | -2.1 | 5.6E-14 | -2.3 | 9.0E-15 | -2.2 | 0.22 |
| STARD13   | -2.2 | 9.3E-14 | -2.2 | 3.9E-14 | -2.2 | 0.22 |
| DNAJB11   | -2.1 | 4.3E-14 | -2.3 | 1.1E-14 | -2.2 | 0.22 |
| RGAG1     | -2.7 | 2.9E-15 | -1.7 | 4.8E-10 | -2.2 | 0.22 |
| KLK10     | -2.5 | 6.7E-16 | -1.9 | 1.0E-12 | -2.2 | 0.22 |
| TMEM45B   | -2.3 | 5.5E-15 | -2.1 | 7.8E-14 | -2.2 | 0.22 |
| ARHGAP6   | -2.2 | 2.0E-14 | -2.2 | 3.6E-14 | -2.2 | 0.22 |
| TMPRSS2   | -2.2 | 1.8E-14 | -2.2 | 2.0E-14 | -2.2 | 0.22 |
| SKA3      | -2.1 | 7.8E-14 | -2.3 | 6.0E-15 | -2.2 | 0.22 |
| PLA2G5    | -2.4 | 1.5E-15 | -2.0 | 3.8E-13 | -2.2 | 0.22 |
| TCF21     | -2.4 | 1.3E-15 | -2.0 | 3.9E-13 | -2.2 | 0.22 |
| CDX2      | -2.2 | 1.2E-06 | -2.2 | 1.1E-05 | -2.2 | 0.22 |
| DPYSL3    | -2.2 | 9.3E-12 | -2.3 | 5.4E-13 | -2.2 | 0.22 |
| KRTHA3A   | -2.1 | 2.8E-10 | -2.3 | 1.9E-13 | -2.2 | 0.21 |
| HHEX      | -2.1 | 2.4E-11 | -2.4 | 4.4E-14 | -2.2 | 0.21 |
| C7orf63   | -1.4 | 3.2E-05 | -3.1 | 2.3E-13 | -2.2 | 0.21 |
| MARCO     | -2.6 | 2.3E-15 | -1.9 | 7.6E-12 | -2.2 | 0.21 |
| IQCG      | -2.3 | 1.6E-14 | -2.2 | 3.4E-14 | -2.2 | 0.21 |
| CD55      | -2.3 | 1.1E-14 | -2.2 | 3.6E-14 | -2.2 | 0.21 |
| OGDHL     | -2.3 | 2.6E-13 | -2.2 | 2.8E-13 | -2.2 | 0.21 |
| IGHV3-11  | -2.5 | 1.7E-15 | -2.0 | 6.2E-13 | -2.2 | 0.21 |
| AFF1      | -2.4 | 1.5E-04 | -2.1 | 2.9E-04 | -2.2 | 0.21 |
| TMED6     | -2.6 | 8.8E-14 | -1.8 | 1.5E-10 | -2.2 | 0.21 |
| MTMR9L    | -2.4 | 6.5E-13 | -2.1 | 1.2E-11 | -2.2 | 0.21 |
| C20orf160 | -2.1 | 5.1E-11 | -2.3 | 4.9E-13 | -2.2 | 0.21 |
| CLIC5     | -2.6 | 5.7E-13 | -1.9 | 3.0E-10 | -2.2 | 0.21 |
| ITPR3     | -2.3 | 8.0E-15 | -2.2 | 2.4E-14 | -2.2 | 0.21 |
| SH3PXD2A  | -2.6 | 2.1E-06 | -1.8 | 4.1E-12 | -2.2 | 0.21 |
| ARPC1B    | -2.3 | 6.9E-15 | -2.2 | 2.4E-14 | -2.2 | 0.21 |
| REG3A     | -2.5 | 1.2E-12 | -2.0 | 1.2E-10 | -2.2 | 0.21 |
| TPPP3     | -2.3 | 1.2E-14 | -2.2 | 4.3E-14 | -2.2 | 0.21 |

|          |      |         |      |         |      |      |
|----------|------|---------|------|---------|------|------|
| SLC39A8  | -1.9 | 1.4E-12 | -2.6 | 3.4E-16 | -2.2 | 0.21 |
| PSMB9    | -2.5 | 8.4E-16 | -2.0 | 2.4E-13 | -2.2 | 0.21 |
| C1orf116 | -2.9 | 2.0E-14 | -1.6 | 5.3E-10 | -2.2 | 0.21 |
| CALHM2   | -2.1 | 5.8E-14 | -2.4 | 2.7E-15 | -2.2 | 0.21 |
| SYTL4    | -2.6 | 3.0E-16 | -1.9 | 2.5E-12 | -2.3 | 0.21 |
| NAV3     | -2.2 | 1.3E-13 | -2.4 | 5.2E-15 | -2.3 | 0.21 |
| TBC1D4   | -2.6 | 4.3E-16 | -1.9 | 2.2E-12 | -2.3 | 0.21 |
| BST2     | -2.2 | 1.3E-14 | -2.3 | 8.0E-15 | -2.3 | 0.21 |
| NPR3     | -2.2 | 1.7E-10 | -2.3 | 6.5E-05 | -2.3 | 0.21 |
| LAMC2    | -2.4 | 1.1E-15 | -2.1 | 1.3E-13 | -2.3 | 0.21 |
| C10orf79 | -2.3 | 2.0E-07 | -2.2 | 3.7E-06 | -2.3 | 0.21 |
| HLA-E    | -2.4 | 1.1E-15 | -2.1 | 1.1E-13 | -2.3 | 0.21 |
| PKMYT1   | -2.5 | 1.2E-15 | -2.1 | 1.8E-13 | -2.3 | 0.21 |
| STX3     | -2.1 | 7.0E-14 | -2.4 | 1.5E-15 | -2.3 | 0.21 |
| C3       | -2.5 | 5.4E-16 | -2.0 | 2.2E-13 | -2.3 | 0.21 |
| NROB2    | -2.0 | 3.1E-11 | -2.6 | 9.7E-15 | -2.3 | 0.21 |
| ACVR1C   | -2.3 | 5.1E-12 | -2.2 | 5.0E-12 | -2.3 | 0.21 |
| RHCG     | -2.7 | 9.1E-17 | -1.9 | 2.3E-12 | -2.3 | 0.21 |
| GCOM1    | -2.6 | 1.0E-11 | -1.9 | 2.1E-09 | -2.3 | 0.21 |
| GRINL1A  | -2.6 | 1.0E-11 | -1.9 | 2.1E-09 | -2.3 | 0.21 |
| C8orf48  | -2.8 | 2.6E-11 | -1.7 | 1.8E-07 | -2.3 | 0.21 |
| GRB10    | -2.1 | 7.6E-14 | -2.4 | 1.2E-15 | -2.3 | 0.21 |
| IRX4     | -2.3 | 6.2E-13 | -2.2 | 5.3E-13 | -2.3 | 0.21 |
| PCK1     | -1.9 | 1.7E-05 | -2.6 | 1.1E-07 | -2.3 | 0.21 |
| UBXN8    | -2.2 | 1.3E-14 | -2.3 | 4.5E-15 | -2.3 | 0.21 |
| KRT7     | -2.6 | 1.0E-13 | -2.0 | 5.3E-11 | -2.3 | 0.21 |
| ZNF331   | -2.4 | 2.7E-15 | -2.2 | 2.1E-14 | -2.3 | 0.21 |
| ZFPM2    | -2.5 | 1.1E-15 | -2.1 | 9.5E-14 | -2.3 | 0.20 |
| SLC19A3  | -2.3 | 2.0E-07 | -2.3 | 5.5E-10 | -2.3 | 0.20 |
| JUP      | -2.5 | 3.7E-16 | -2.0 | 1.7E-13 | -2.3 | 0.20 |
| GBP4     | -2.3 | 7.1E-13 | -2.3 | 1.3E-13 | -2.3 | 0.20 |
| SYT6     | -2.5 | 5.8E-12 | -2.1 | 4.6E-11 | -2.3 | 0.20 |
| CD1E     | -2.1 | 9.2E-04 | -2.5 | 1.3E-04 | -2.3 | 0.20 |
| TM4SF19  | -3.2 | 9.7E-10 | -1.4 | 6.0E-04 | -2.3 | 0.20 |
| C1S      | -2.3 | 4.4E-15 | -2.3 | 7.5E-15 | -2.3 | 0.20 |
| SPECC1   | -2.3 | 1.1E-14 | -2.3 | 4.4E-15 | -2.3 | 0.20 |
| PTK6     | -2.6 | 1.3E-15 | -2.1 | 3.6E-13 | -2.3 | 0.20 |
| GJB5     | -3.0 | 1.1E-08 | -1.6 | 6.5E-04 | -2.3 | 0.20 |
| LATS1    | -3.0 | 4.3E-09 | -1.6 | 6.9E-05 | -2.3 | 0.20 |
| PMAIP1   | -3.3 | 9.6E-14 | -1.3 | 1.4E-07 | -2.3 | 0.20 |
| SOCS3    | -2.4 | 1.0E-15 | -2.2 | 3.6E-14 | -2.3 | 0.20 |
| DYNLRB2  | -2.5 | 9.6E-10 | -2.1 | 4.1E-09 | -2.3 | 0.20 |
| UST      | -2.3 | 3.0E-10 | -2.4 | 6.6E-15 | -2.3 | 0.20 |
| C1R      | -2.4 | 1.0E-15 | -2.2 | 2.8E-14 | -2.3 | 0.20 |
| HSPB2    | -2.3 | 3.6E-15 | -2.3 | 8.8E-15 | -2.3 | 0.20 |
| CDH23    | -2.3 | 6.9E-14 | -2.3 | 3.1E-14 | -2.3 | 0.20 |
| ACTA2    | -2.6 | 2.2E-16 | -2.1 | 1.6E-13 | -2.3 | 0.20 |
| C4orf7   | -2.4 | 2.0E-12 | -2.2 | 6.7E-13 | -2.3 | 0.20 |
| LEPREL1  | -2.3 | 4.8E-15 | -2.3 | 4.6E-15 | -2.3 | 0.20 |
| DNAJC27  | -2.7 | 5.2E-10 | -1.9 | 1.3E-06 | -2.3 | 0.20 |
| TMEM144  | -2.2 | 8.9E-10 | -2.4 | 5.6E-11 | -2.3 | 0.20 |
| THBS4    | -3.2 | 2.3E-09 | -1.4 | 2.7E-04 | -2.3 | 0.20 |
| LGALS3   | -2.4 | 1.0E-15 | -2.2 | 1.7E-14 | -2.3 | 0.20 |
| KRTCAP3  | -2.4 | 3.1E-15 | -2.3 | 4.9E-15 | -2.3 | 0.20 |
| GAL      | -2.5 | 3.7E-16 | -2.1 | 6.0E-14 | -2.3 | 0.20 |
| SOAT2    | -2.8 | 2.9E-14 | -1.9 | 7.2E-11 | -2.3 | 0.20 |
| CD83     | -2.4 | 2.3E-15 | -2.3 | 7.6E-15 | -2.3 | 0.20 |
| SIK1     | -2.5 | 8.5E-16 | -2.2 | 1.8E-14 | -2.3 | 0.20 |
| FOXA3    | -3.0 | 1.2E-16 | -1.6 | 3.5E-10 | -2.3 | 0.20 |
| CCL4     | -2.2 | 5.9E-13 | -2.4 | 3.5E-15 | -2.3 | 0.20 |
| B4GALT1  | -3.0 | 1.5E-09 | -1.7 | 9.6E-07 | -2.3 | 0.20 |
| KALRN    | -2.3 | 6.2E-04 | -2.3 | 3.9E-05 | -2.3 | 0.20 |

|            |      |         |      |         |      |      |
|------------|------|---------|------|---------|------|------|
| C21orf129  | -2.2 | 4.2E-05 | -2.5 | 4.7E-06 | -2.3 | 0.20 |
| FAM113B    | -2.4 | 3.8E-15 | -2.3 | 4.8E-15 | -2.3 | 0.20 |
| FAM123B    | -2.4 | 3.2E-13 | -2.3 | 3.6E-14 | -2.3 | 0.20 |
| NCOA7      | -2.5 | 1.0E-15 | -2.2 | 2.0E-14 | -2.4 | 0.20 |
| SLC13A3    | -2.3 | 1.4E-14 | -2.4 | 5.9E-15 | -2.4 | 0.20 |
| PLEKHF1    | -2.7 | 2.5E-15 | -2.0 | 3.0E-12 | -2.4 | 0.20 |
| NFKBIZ     | -2.4 | 5.7E-15 | -2.3 | 4.5E-15 | -2.4 | 0.20 |
| PRSS22     | -2.7 | 1.4E-16 | -2.1 | 1.8E-13 | -2.4 | 0.20 |
| CD302      | -2.4 | 3.9E-15 | -2.3 | 8.7E-15 | -2.4 | 0.20 |
| LY75       | -2.4 | 3.9E-15 | -2.3 | 8.7E-15 | -2.4 | 0.20 |
| CEACAM3    | -2.6 | 1.0E-10 | -2.2 | 4.5E-11 | -2.4 | 0.20 |
| LMO7       | -2.5 | 1.1E-15 | -2.3 | 1.3E-14 | -2.4 | 0.20 |
| CYP39A1    | -2.2 | 1.3E-11 | -2.5 | 1.3E-14 | -2.4 | 0.19 |
| PRSS35     | -2.1 | 3.7E-10 | -2.6 | 8.3E-13 | -2.4 | 0.19 |
| ZNF275     | -2.5 | 5.9E-16 | -2.2 | 1.3E-14 | -2.4 | 0.19 |
| RBP5       | -2.4 | 1.7E-13 | -2.3 | 7.3E-14 | -2.4 | 0.19 |
| LRRC19     | -3.1 | 2.3E-10 | -1.6 | 2.2E-06 | -2.4 | 0.19 |
| SOX9       | -2.4 | 1.2E-15 | -2.3 | 5.3E-15 | -2.4 | 0.19 |
| NT5DC1     | -2.7 | 2.1E-16 | -2.1 | 1.6E-13 | -2.4 | 0.19 |
| LGR5       | -2.4 | 2.7E-14 | -2.4 | 8.6E-15 | -2.4 | 0.19 |
| C2orf40    | -2.4 | 8.4E-14 | -2.3 | 7.7E-14 | -2.4 | 0.19 |
| HOPX       | -2.5 | 7.6E-16 | -2.3 | 7.9E-15 | -2.4 | 0.19 |
| HLA-A      | -2.6 | 1.9E-16 | -2.2 | 3.5E-14 | -2.4 | 0.19 |
| JAKMIP2    | -2.4 | 1.0E-08 | -2.3 | 1.4E-10 | -2.4 | 0.19 |
| PSD4       | -2.5 | 9.1E-16 | -2.3 | 4.9E-15 | -2.4 | 0.19 |
| CCL19      | -3.0 | 1.5E-17 | -1.8 | 1.0E-11 | -2.4 | 0.19 |
| EMX2       | -2.4 | 9.5E-15 | -2.4 | 2.6E-15 | -2.4 | 0.19 |
| TOM1       | -3.1 | 3.7E-10 | -1.7 | 3.3E-06 | -2.4 | 0.19 |
| C6orf141   | -2.5 | 4.6E-14 | -2.3 | 2.1E-13 | -2.4 | 0.19 |
| F2         | -2.6 | 2.6E-09 | -2.2 | 2.2E-10 | -2.4 | 0.19 |
| PROM1      | -2.2 | 3.1E-12 | -2.6 | 6.6E-15 | -2.4 | 0.19 |
| UPP1       | -2.1 | 2.0E-09 | -2.7 | 8.0E-13 | -2.4 | 0.19 |
| CELA3A     | -3.0 | 3.5E-17 | -1.8 | 1.4E-11 | -2.4 | 0.19 |
| RAB11FIP1  | -2.6 | 1.5E-10 | -2.2 | 2.6E-14 | -2.4 | 0.19 |
| PTPRR      | -2.7 | 8.0E-14 | -2.1 | 4.0E-12 | -2.4 | 0.19 |
| ACOT11     | -2.2 | 1.8E-14 | -2.6 | 2.9E-16 | -2.4 | 0.19 |
| SPINK4     | -2.6 | 1.5E-12 | -2.1 | 9.9E-12 | -2.4 | 0.19 |
| ARMCX1     | -2.4 | 2.5E-15 | -2.4 | 1.5E-15 | -2.4 | 0.19 |
| PPAP2B     | -2.3 | 4.8E-15 | -2.5 | 7.3E-16 | -2.4 | 0.19 |
| ARL5B      | -3.0 | 4.3E-08 | -1.8 | 3.6E-05 | -2.4 | 0.19 |
| PON3       | -2.4 | 1.1E-15 | -2.3 | 3.2E-15 | -2.4 | 0.19 |
| AIFM3      | -3.0 | 1.9E-12 | -1.7 | 3.7E-07 | -2.4 | 0.19 |
| CXCL10     | -2.6 | 9.5E-16 | -2.2 | 3.4E-14 | -2.4 | 0.19 |
| KCND2      | -3.2 | 1.8E-15 | -1.6 | 6.0E-09 | -2.4 | 0.19 |
| IGKV2-40   | -2.7 | 1.3E-16 | -2.1 | 6.2E-14 | -2.4 | 0.19 |
| MCHR1      | -2.7 | 6.1E-17 | -2.1 | 8.9E-14 | -2.4 | 0.19 |
| HS6ST2     | -1.9 | 9.7E-09 | -2.9 | 5.6E-09 | -2.4 | 0.19 |
| XK         | -2.8 | 9.1E-15 | -2.0 | 3.3E-12 | -2.4 | 0.19 |
| TRIB1      | -2.2 | 5.7E-12 | -2.6 | 1.6E-14 | -2.4 | 0.19 |
| HSPB8      | -3.1 | 7.2E-10 | -1.7 | 4.2E-04 | -2.4 | 0.19 |
| IGF2BP2    | -2.5 | 7.6E-16 | -2.3 | 3.2E-15 | -2.4 | 0.19 |
| BTG2       | -2.5 | 5.2E-16 | -2.3 | 4.1E-15 | -2.4 | 0.19 |
| BAIAP2L2   | -2.9 | 1.1E-07 | -1.9 | 8.3E-12 | -2.4 | 0.19 |
| RPL39L     | -2.6 | 2.0E-16 | -2.2 | 1.1E-14 | -2.4 | 0.19 |
| ST6GALNAC1 | -2.0 | 1.7E-12 | -2.9 | 2.6E-17 | -2.4 | 0.19 |
| LRIG3      | -2.0 | 3.0E-13 | -2.8 | 2.6E-17 | -2.4 | 0.19 |
| C1orf85    | -2.9 | 2.7E-09 | -2.0 | 9.1E-06 | -2.4 | 0.19 |
| HLA-C      | -2.7 | 6.9E-17 | -2.2 | 3.5E-14 | -2.4 | 0.19 |
| PTER       | -2.5 | 1.6E-12 | -2.3 | 1.8E-12 | -2.4 | 0.19 |
| EPS8       | -2.4 | 2.9E-15 | -2.5 | 5.8E-16 | -2.4 | 0.19 |
| DTX3L      | -2.7 | 1.4E-09 | -2.1 | 3.9E-08 | -2.4 | 0.19 |
| MOBKL2B    | -2.6 | 4.8E-14 | -2.2 | 2.2E-13 | -2.4 | 0.19 |

|          |      |         |      |         |      |      |
|----------|------|---------|------|---------|------|------|
| C20orf54 | -2.5 | 1.5E-10 | -2.4 | 6.5E-11 | -2.4 | 0.19 |
| EPCAM    | -2.4 | 1.0E-15 | -2.4 | 1.2E-15 | -2.4 | 0.19 |
| IGF2     | -2.8 | 5.1E-16 | -2.0 | 3.5E-12 | -2.4 | 0.18 |
| CDK14    | -2.7 | 9.5E-09 | -2.2 | 3.4E-06 | -2.4 | 0.18 |
| KCTD14   | -2.6 | 9.5E-09 | -2.3 | 8.5E-08 | -2.4 | 0.18 |
| CARD9    | -2.7 | 8.0E-17 | -2.2 | 3.3E-14 | -2.4 | 0.18 |
| IL1B     | -2.3 | 2.1E-14 | -2.5 | 7.7E-16 | -2.4 | 0.18 |
| ME3      | -2.5 | 7.4E-16 | -2.4 | 1.8E-15 | -2.4 | 0.18 |
| PRIM1    | -2.5 | 1.8E-15 | -2.4 | 3.6E-15 | -2.4 | 0.18 |
| DDR2     | -2.8 | 1.1E-16 | -2.1 | 1.5E-13 | -2.4 | 0.18 |
| HES1     | -2.5 | 3.6E-16 | -2.4 | 2.8E-15 | -2.4 | 0.18 |
| CCT6B    | -3.0 | 8.8E-14 | -1.9 | 1.1E-11 | -2.4 | 0.18 |
| SERPINB6 | -2.4 | 1.1E-15 | -2.5 | 8.6E-16 | -2.4 | 0.18 |
| NEU4     | -2.7 | 9.6E-17 | -2.2 | 1.3E-14 | -2.5 | 0.18 |
| CYP20A1  | -2.5 | 1.3E-12 | -2.4 | 9.0E-13 | -2.5 | 0.18 |
| CDCA7    | -2.5 | 5.6E-16 | -2.4 | 1.3E-15 | -2.5 | 0.18 |
| H19      | -2.8 | 1.7E-17 | -2.1 | 9.8E-14 | -2.5 | 0.18 |
| DHRS9    | -3.1 | 1.2E-14 | -1.8 | 1.7E-10 | -2.5 | 0.18 |
| LTB      | -2.5 | 6.3E-16 | -2.4 | 1.0E-15 | -2.5 | 0.18 |
| SSFA2    | -2.3 | 4.7E-15 | -2.6 | 1.3E-16 | -2.5 | 0.18 |
| CCDC68   | -2.6 | 8.6E-10 | -2.3 | 4.1E-14 | -2.5 | 0.18 |
| CRB3     | -2.5 | 4.2E-16 | -2.4 | 1.5E-15 | -2.5 | 0.18 |
| FLJ39739 | -2.4 | 1.0E-13 | -2.5 | 8.1E-15 | -2.5 | 0.18 |
| DGKG     | -3.1 | 2.0E-08 | -1.9 | 1.4E-04 | -2.5 | 0.18 |
| SDR42E1  | -2.4 | 4.9E-11 | -2.6 | 6.6E-13 | -2.5 | 0.18 |
| TMEM200A | -2.6 | 6.4E-16 | -2.4 | 2.3E-15 | -2.5 | 0.18 |
| HS3ST1   | -2.5 | 6.7E-16 | -2.5 | 6.8E-16 | -2.5 | 0.18 |
| PSD3     | -2.6 | 1.4E-16 | -2.3 | 5.2E-15 | -2.5 | 0.18 |
| FGFBP2   | -1.8 | 1.7E-08 | -3.2 | 2.0E-15 | -2.5 | 0.18 |
| CAMKK2   | -2.5 | 2.2E-14 | -2.5 | 7.1E-15 | -2.5 | 0.18 |
| CXorf57  | -2.6 | 4.9E-13 | -2.4 | 5.7E-13 | -2.5 | 0.18 |
| MMP23A   | -2.7 | 9.7E-17 | -2.3 | 5.5E-15 | -2.5 | 0.18 |
| MMP23B   | -2.7 | 9.7E-17 | -2.3 | 5.5E-15 | -2.5 | 0.18 |
| BTNL8    | -2.3 | 6.0E-04 | -2.7 | 9.2E-04 | -2.5 | 0.18 |
| RIBC2    | -2.5 | 1.0E-13 | -2.5 | 9.7E-15 | -2.5 | 0.18 |
| SORCS2   | -3.0 | 1.3E-13 | -2.0 | 1.3E-10 | -2.5 | 0.18 |
| LYPD3    | -2.8 | 2.5E-17 | -2.2 | 1.9E-14 | -2.5 | 0.18 |
| MAF      | -2.8 | 4.8E-13 | -2.2 | 8.3E-12 | -2.5 | 0.18 |
| SERTAD4  | -2.3 | 4.9E-11 | -2.7 | 2.0E-13 | -2.5 | 0.18 |
| EHF      | -2.7 | 3.2E-14 | -2.3 | 1.4E-12 | -2.5 | 0.18 |
| HDC      | -2.7 | 4.6E-14 | -2.3 | 9.4E-13 | -2.5 | 0.18 |
| RNF43    | -2.5 | 1.0E-15 | -2.5 | 3.5E-16 | -2.5 | 0.18 |
| TAGLN    | -2.8 | 3.6E-17 | -2.3 | 1.1E-14 | -2.5 | 0.18 |
| ACSM3    | -2.7 | 3.1E-16 | -2.3 | 1.7E-14 | -2.5 | 0.18 |
| CNKSR3   | -2.6 | 2.2E-16 | -2.4 | 1.1E-15 | -2.5 | 0.18 |
| HLA-B    | -2.7 | 6.1E-17 | -2.3 | 4.8E-15 | -2.5 | 0.18 |
| KLHDC8A  | -2.7 | 5.6E-17 | -2.3 | 7.8E-15 | -2.5 | 0.18 |
| IVL      | -2.8 | 6.5E-17 | -2.2 | 1.8E-14 | -2.5 | 0.18 |
| GADD45G  | -2.6 | 1.9E-16 | -2.4 | 2.1E-15 | -2.5 | 0.18 |
| VWCE     | -2.7 | 9.9E-17 | -2.4 | 2.5E-15 | -2.5 | 0.18 |
| TNF      | -2.4 | 1.1E-13 | -2.6 | 7.7E-15 | -2.5 | 0.18 |
| HLA-F    | -2.7 | 5.1E-17 | -2.3 | 4.6E-15 | -2.5 | 0.17 |
| HLA-J    | -2.7 | 5.1E-17 | -2.3 | 4.6E-15 | -2.5 | 0.17 |
| CPN1     | -3.6 | 1.5E-13 | -1.4 | 2.6E-07 | -2.5 | 0.17 |
| HEPH     | -2.4 | 1.5E-15 | -2.6 | 1.5E-16 | -2.5 | 0.17 |
| SOD2     | -2.6 | 1.1E-16 | -2.4 | 1.6E-15 | -2.5 | 0.17 |
| INHA     | -2.8 | 2.2E-17 | -2.2 | 2.2E-14 | -2.5 | 0.17 |
| TRIM38   | -3.0 | 2.1E-11 | -2.0 | 1.1E-08 | -2.5 | 0.17 |
| TMEM37   | -2.6 | 3.0E-15 | -2.4 | 6.8E-15 | -2.5 | 0.17 |
| HTRA1    | -2.5 | 3.3E-16 | -2.5 | 4.0E-16 | -2.5 | 0.17 |
| TRIB3    | -2.4 | 1.1E-15 | -2.6 | 1.2E-16 | -2.5 | 0.17 |
| PYROXD1  | -2.5 | 1.5E-15 | -2.6 | 3.4E-16 | -2.5 | 0.17 |

|          |      |         |      |         |      |      |
|----------|------|---------|------|---------|------|------|
| TACC2    | -2.6 | 2.1E-16 | -2.5 | 6.6E-16 | -2.5 | 0.17 |
| EPHX2    | -2.6 | 3.3E-16 | -2.5 | 4.5E-16 | -2.5 | 0.17 |
| LIPH     | -2.6 | 2.1E-16 | -2.4 | 1.2E-15 | -2.5 | 0.17 |
| NPAS2    | -2.5 | 5.7E-16 | -2.5 | 4.1E-16 | -2.5 | 0.17 |
| TDGF1    | -2.5 | 4.1E-15 | -2.6 | 5.1E-16 | -2.5 | 0.17 |
| MAOB     | -3.0 | 5.4E-18 | -2.1 | 6.7E-14 | -2.5 | 0.17 |
| BAAT     | -2.0 | 3.6E-10 | -3.1 | 1.2E-14 | -2.5 | 0.17 |
| CLDN4    | -2.7 | 8.8E-17 | -2.4 | 1.1E-15 | -2.6 | 0.17 |
| PDGFRL   | -2.7 | 1.0E-16 | -2.4 | 1.1E-15 | -2.6 | 0.17 |
| ACSS1    | -2.8 | 2.7E-17 | -2.3 | 4.0E-15 | -2.6 | 0.17 |
| SGPP2    | -2.7 | 1.8E-16 | -2.4 | 4.4E-15 | -2.6 | 0.17 |
| AIFM2    | -2.7 | 6.1E-17 | -2.4 | 2.1E-15 | -2.6 | 0.17 |
| MPP7     | -2.6 | 3.1E-10 | -2.5 | 7.4E-10 | -2.6 | 0.17 |
| PRODH    | -3.0 | 3.0E-18 | -2.1 | 8.4E-14 | -2.6 | 0.17 |
| MGC29506 | -2.4 | 2.3E-13 | -2.8 | 9.6E-16 | -2.6 | 0.17 |
| UBXN10   | -2.7 | 8.2E-16 | -2.5 | 3.2E-15 | -2.6 | 0.17 |
| PRR5L    | -2.7 | 2.2E-16 | -2.4 | 2.7E-15 | -2.6 | 0.17 |
| SLC22A3  | -2.3 | 3.6E-14 | -2.8 | 3.1E-17 | -2.6 | 0.17 |
| CIRBP    | -2.8 | 3.2E-17 | -2.4 | 2.0E-15 | -2.6 | 0.17 |
| HRH1     | -2.6 | 2.1E-10 | -2.5 | 2.7E-10 | -2.6 | 0.17 |
| VNN1     | -3.0 | 6.2E-09 | -2.2 | 4.7E-06 | -2.6 | 0.17 |
| TMEM159  | -3.0 | 3.5E-14 | -2.1 | 1.9E-10 | -2.6 | 0.17 |
| CCBE1    | -2.8 | 2.0E-15 | -2.4 | 7.6E-14 | -2.6 | 0.17 |
| HS3ST3A1 | -2.7 | 3.2E-15 | -2.5 | 3.1E-15 | -2.6 | 0.17 |
| KCNJ16   | -2.5 | 7.3E-06 | -2.7 | 3.9E-10 | -2.6 | 0.17 |
| NKX6-3   | -2.9 | 1.2E-17 | -2.2 | 1.5E-14 | -2.6 | 0.17 |
| ACTG2    | -2.7 | 6.3E-17 | -2.5 | 5.9E-16 | -2.6 | 0.17 |
| BNC2     | -2.5 | 5.9E-15 | -2.7 | 2.9E-16 | -2.6 | 0.17 |
| SUSD4    | -3.2 | 1.2E-09 | -1.9 | 1.4E-06 | -2.6 | 0.17 |
| ALOX12   | -1.9 | 2.6E-07 | -3.3 | 3.3E-11 | -2.6 | 0.17 |
| GLI2     | -2.7 | 1.3E-15 | -2.5 | 2.1E-15 | -2.6 | 0.16 |
| SLCO4A1  | -2.7 | 5.6E-17 | -2.5 | 6.0E-16 | -2.6 | 0.16 |
| SNCAIP   | -2.6 | 4.8E-16 | -2.6 | 1.6E-16 | -2.6 | 0.16 |
| UTS2     | -1.6 | 1.4E-09 | -3.6 | 2.4E-18 | -2.6 | 0.16 |
| FCER1A   | -3.3 | 1.4E-10 | -1.9 | 5.4E-06 | -2.6 | 0.16 |
| PKIB     | -3.2 | 3.3E-10 | -2.0 | 5.9E-07 | -2.6 | 0.16 |
| DPT      | -2.2 | 8.9E-04 | -3.0 | 4.2E-05 | -2.6 | 0.16 |
| SSPN     | -2.4 | 1.8E-15 | -2.8 | 2.2E-17 | -2.6 | 0.16 |
| FUCA2    | -2.6 | 1.3E-16 | -2.6 | 2.3E-16 | -2.6 | 0.16 |
| CACNB2   | -2.9 | 4.1E-15 | -2.4 | 8.9E-14 | -2.6 | 0.16 |
| MAPK4    | -2.6 | 2.0E-06 | -2.6 | 1.5E-11 | -2.6 | 0.16 |
| BZRAP1   | -2.7 | 8.5E-17 | -2.5 | 5.7E-16 | -2.6 | 0.16 |
| CALML4   | -2.6 | 1.6E-16 | -2.6 | 1.6E-16 | -2.6 | 0.16 |
| CRHBP    | -2.7 | 8.2E-14 | -2.5 | 8.4E-14 | -2.6 | 0.16 |
| PHACTR3  | -2.9 | 1.8E-17 | -2.3 | 6.6E-15 | -2.6 | 0.16 |
| C15orf39 | -2.4 | 1.2E-15 | -2.8 | 2.4E-17 | -2.6 | 0.16 |
| TRIM15   | -3.1 | 3.7E-09 | -2.2 | 2.2E-06 | -2.6 | 0.16 |
| RASL11B  | -2.8 | 3.7E-17 | -2.5 | 8.6E-16 | -2.6 | 0.16 |
| AEBP1    | -2.7 | 1.9E-16 | -2.6 | 5.3E-16 | -2.6 | 0.16 |
| PROCR    | -2.8 | 3.6E-17 | -2.5 | 6.2E-16 | -2.6 | 0.16 |
| CGNL1    | -2.5 | 3.5E-16 | -2.7 | 5.3E-17 | -2.6 | 0.16 |
| FMO2     | -3.0 | 7.9E-09 | -2.3 | 3.7E-14 | -2.6 | 0.16 |
| DYNC111  | -3.6 | 1.2E-15 | -1.7 | 1.2E-08 | -2.6 | 0.16 |
| XG       | -3.0 | 1.2E-15 | -2.3 | 1.4E-13 | -2.6 | 0.16 |
| ADRA2A   | -2.8 | 3.0E-17 | -2.5 | 9.6E-16 | -2.6 | 0.16 |
| SEMA6D   | -3.2 | 8.6E-14 | -2.1 | 4.5E-10 | -2.6 | 0.16 |
| SFRP1    | -2.7 | 4.8E-17 | -2.5 | 3.7E-16 | -2.6 | 0.16 |
| APOA1    | -3.0 | 1.3E-17 | -2.3 | 5.7E-15 | -2.6 | 0.16 |
| C5orf4   | -2.8 | 1.8E-17 | -2.5 | 7.8E-16 | -2.6 | 0.16 |
| SERPINA3 | -2.2 | 3.2E-13 | -3.1 | 1.4E-17 | -2.7 | 0.16 |
| EDNRA    | -3.0 | 9.1E-17 | -2.3 | 6.4E-14 | -2.7 | 0.16 |
| FMO3     | -2.7 | 6.4E-14 | -2.6 | 9.1E-14 | -2.7 | 0.16 |

|           |      |         |      |         |      |      |
|-----------|------|---------|------|---------|------|------|
| AGR3      | -2.7 | 8.7E-17 | -2.6 | 1.2E-16 | -2.7 | 0.16 |
| MNS1      | -3.5 | 3.3E-16 | -1.8 | 1.7E-10 | -2.7 | 0.16 |
| CAMK2D    | -2.5 | 5.2E-14 | -2.8 | 9.0E-16 | -2.7 | 0.16 |
| OCA2      | -2.6 | 2.9E-12 | -2.7 | 8.8E-14 | -2.7 | 0.16 |
| MMP12     | -2.5 | 7.7E-13 | -2.8 | 1.0E-14 | -2.7 | 0.16 |
| RAB34     | -2.7 | 8.8E-17 | -2.7 | 7.4E-17 | -2.7 | 0.16 |
| PHEX      | -3.1 | 1.9E-11 | -2.2 | 1.2E-08 | -2.7 | 0.16 |
| MAP3K8    | -2.8 | 4.4E-17 | -2.5 | 5.0E-16 | -2.7 | 0.16 |
| C20orf134 | -3.6 | 1.1E-12 | -1.8 | 2.4E-09 | -2.7 | 0.16 |
| BIN1      | -2.7 | 6.8E-17 | -2.6 | 1.7E-16 | -2.7 | 0.16 |
| C4orf49   | -2.8 | 4.0E-17 | -2.6 | 1.9E-16 | -2.7 | 0.16 |
| HSD3B2    | -2.6 | 1.3E-15 | -2.7 | 9.0E-17 | -2.7 | 0.16 |
| COL9A1    | -2.7 | 4.1E-16 | -2.7 | 1.8E-16 | -2.7 | 0.16 |
| CTSG      | -2.8 | 4.6E-17 | -2.5 | 6.2E-16 | -2.7 | 0.16 |
| ALB       | -2.5 | 3.7E-05 | -2.9 | 3.4E-04 | -2.7 | 0.16 |
| GGTLC1    | -2.9 | 1.5E-17 | -2.5 | 1.2E-15 | -2.7 | 0.15 |
| NAALAD2   | -3.7 | 5.7E-13 | -1.7 | 1.3E-07 | -2.7 | 0.15 |
| SPC25     | -2.6 | 1.4E-16 | -2.8 | 3.7E-17 | -2.7 | 0.15 |
| TM4SF5    | -3.2 | 1.2E-18 | -2.2 | 5.0E-14 | -2.7 | 0.15 |
| BNC1      | -2.6 | 2.3E-06 | -2.8 | 2.5E-06 | -2.7 | 0.15 |
| HSPA12B   | -3.0 | 1.4E-17 | -2.4 | 4.2E-15 | -2.7 | 0.15 |
| SLC40A1   | -2.9 | 1.4E-17 | -2.6 | 2.6E-16 | -2.7 | 0.15 |
| TUBA4A    | -2.9 | 9.8E-18 | -2.5 | 4.1E-16 | -2.7 | 0.15 |
| TUBA4B    | -2.9 | 9.8E-18 | -2.5 | 4.1E-16 | -2.7 | 0.15 |
| USH1C     | -3.5 | 6.2E-16 | -2.0 | 1.2E-10 | -2.7 | 0.15 |
| F5        | -2.7 | 6.0E-17 | -2.7 | 5.9E-17 | -2.7 | 0.15 |
| FAM83F    | -3.0 | 5.1E-17 | -2.4 | 1.0E-14 | -2.7 | 0.15 |
| DYDC2     | -3.6 | 9.2E-13 | -1.8 | 9.5E-09 | -2.7 | 0.15 |
| GNG4      | -3.0 | 3.0E-18 | -2.4 | 1.5E-15 | -2.7 | 0.15 |
| IRF8      | -3.4 | 4.9E-11 | -2.1 | 1.7E-08 | -2.7 | 0.15 |
| BCL2L14   | -2.7 | 1.7E-16 | -2.8 | 3.9E-17 | -2.7 | 0.15 |
| CELA2B    | -2.8 | 4.5E-17 | -2.6 | 1.5E-16 | -2.7 | 0.15 |
| C17orf53  | -3.0 | 8.6E-13 | -2.4 | 7.2E-10 | -2.7 | 0.15 |
| ATP2C2    | -2.7 | 1.8E-16 | -2.8 | 4.8E-17 | -2.7 | 0.15 |
| PKNOX2    | -3.2 | 5.6E-16 | -2.3 | 8.3E-14 | -2.7 | 0.15 |
| PPM1K     | -3.1 | 6.8E-18 | -2.4 | 5.2E-15 | -2.7 | 0.15 |
| C1orf172  | -2.7 | 1.2E-16 | -2.8 | 2.1E-17 | -2.7 | 0.15 |
| EPHA4     | -2.7 | 1.2E-16 | -2.7 | 9.3E-17 | -2.7 | 0.15 |
| IGKV4-1   | -3.1 | 4.5E-16 | -2.4 | 5.1E-14 | -2.7 | 0.15 |
| DSP       | -2.8 | 1.8E-17 | -2.7 | 9.3E-17 | -2.7 | 0.15 |
| SLC5A1    | -3.3 | 1.5E-16 | -2.2 | 9.4E-13 | -2.7 | 0.15 |
| SMARCA2   | -2.8 | 2.3E-17 | -2.7 | 7.4E-17 | -2.7 | 0.15 |
| FZD5      | -2.8 | 3.9E-17 | -2.7 | 5.7E-17 | -2.8 | 0.15 |
| ARHGEF16  | -2.8 | 3.7E-17 | -2.8 | 3.5E-17 | -2.8 | 0.15 |
| KRT4      | -3.2 | 6.5E-19 | -2.3 | 6.5E-15 | -2.8 | 0.15 |
| TNFSF11   | -3.4 | 1.1E-13 | -2.1 | 6.7E-09 | -2.8 | 0.15 |
| LY6D      | -3.1 | 1.5E-18 | -2.4 | 1.7E-15 | -2.8 | 0.15 |
| PRSS8     | -2.8 | 2.5E-17 | -2.7 | 3.9E-17 | -2.8 | 0.15 |
| F10       | -2.8 | 1.9E-17 | -2.7 | 5.4E-17 | -2.8 | 0.15 |
| EPN3      | -2.5 | 8.5E-16 | -3.0 | 3.1E-18 | -2.8 | 0.15 |
| ZFP36L2   | -2.9 | 8.7E-18 | -2.6 | 1.1E-16 | -2.8 | 0.15 |
| RAD51AP1  | -3.2 | 2.9E-18 | -2.4 | 4.2E-15 | -2.8 | 0.15 |
| GNA14     | -3.2 | 4.3E-16 | -2.4 | 1.5E-14 | -2.8 | 0.15 |
| TNMD      | -3.1 | 2.1E-08 | -2.5 | 1.3E-07 | -2.8 | 0.15 |
| CDX1      | -3.1 | 2.2E-17 | -2.4 | 7.2E-15 | -2.8 | 0.15 |
| CWH43     | -2.4 | 2.3E-08 | -3.2 | 2.8E-10 | -2.8 | 0.14 |
| GPR35     | -3.2 | 7.7E-15 | -2.4 | 2.3E-12 | -2.8 | 0.14 |
| PTPRK     | -2.7 | 7.3E-17 | -2.9 | 8.3E-18 | -2.8 | 0.14 |
| HTRA3     | -2.9 | 8.4E-18 | -2.7 | 6.4E-17 | -2.8 | 0.14 |
| CNN1      | -3.0 | 4.6E-18 | -2.6 | 1.3E-16 | -2.8 | 0.14 |
| KRT14     | -3.2 | 1.1E-18 | -2.5 | 8.9E-16 | -2.8 | 0.14 |
| IGJ       | -3.0 | 3.3E-18 | -2.6 | 2.5E-16 | -2.8 | 0.14 |

|           |      |         |      |         |      |      |
|-----------|------|---------|------|---------|------|------|
| REG1A     | -3.1 | 1.7E-18 | -2.5 | 6.4E-16 | -2.8 | 0.14 |
| CCL28     | -2.8 | 1.6E-08 | -2.9 | 1.0E-09 | -2.8 | 0.14 |
| B3GNT3    | -3.0 | 4.9E-18 | -2.6 | 1.0E-16 | -2.8 | 0.14 |
| PROC      | -3.7 | 3.1E-18 | -1.9 | 4.8E-12 | -2.8 | 0.14 |
| ENPP5     | -3.5 | 1.7E-16 | -2.1 | 3.6E-12 | -2.8 | 0.14 |
| PRSS16    | -3.8 | 2.0E-14 | -1.9 | 3.0E-10 | -2.8 | 0.14 |
| CSRP1     | -2.8 | 4.1E-17 | -2.9 | 1.6E-17 | -2.8 | 0.14 |
| APOBEC3G  | -3.3 | 2.8E-17 | -2.3 | 6.8E-14 | -2.8 | 0.14 |
| LCN2      | -2.9 | 1.1E-17 | -2.7 | 4.4E-17 | -2.8 | 0.14 |
| TNFRSF11B | -3.1 | 6.3E-18 | -2.6 | 4.9E-16 | -2.8 | 0.14 |
| TCEAL2    | -3.3 | 6.1E-19 | -2.4 | 2.1E-15 | -2.8 | 0.14 |
| TMEM154   | -2.7 | 1.9E-14 | -2.9 | 2.6E-16 | -2.8 | 0.14 |
| CACNA2D4  | -2.8 | 5.0E-16 | -2.9 | 5.7E-17 | -2.8 | 0.14 |
| LEFTY2    | -3.7 | 1.8E-14 | -1.9 | 3.2E-09 | -2.8 | 0.14 |
| NEURL3    | -3.1 | 6.0E-18 | -2.6 | 2.2E-16 | -2.8 | 0.14 |
| INSL3     | -3.2 | 7.1E-19 | -2.5 | 9.1E-16 | -2.8 | 0.14 |
| ALDH1A1   | -2.9 | 6.7E-18 | -2.7 | 4.1E-17 | -2.8 | 0.14 |
| SPINK5    | -2.9 | 1.5E-17 | -2.8 | 1.9E-17 | -2.8 | 0.14 |
| NUP62CL   | -3.3 | 1.1E-10 | -2.4 | 2.8E-07 | -2.8 | 0.14 |
| KCNJ3     | -3.1 | 5.0E-10 | -2.6 | 2.7E-08 | -2.8 | 0.14 |
| DNAJC15   | -2.9 | 1.1E-17 | -2.8 | 2.2E-17 | -2.8 | 0.14 |
| ASL       | -2.9 | 7.5E-18 | -2.8 | 3.6E-17 | -2.9 | 0.14 |
| COL16A1   | -3.0 | 3.9E-18 | -2.7 | 5.6E-17 | -2.9 | 0.14 |
| MYO15A    | -3.5 | 9.8E-13 | -2.2 | 2.3E-10 | -2.9 | 0.14 |
| SCRG1     | -2.6 | 1.5E-10 | -3.1 | 6.7E-12 | -2.9 | 0.14 |
| NR4A1     | -3.3 | 5.3E-19 | -2.5 | 5.9E-16 | -2.9 | 0.14 |
| PODN      | -3.3 | 5.4E-09 | -2.4 | 7.7E-06 | -2.9 | 0.14 |
| SYT13     | -2.8 | 1.1E-16 | -3.0 | 1.3E-17 | -2.9 | 0.14 |
| EPHB1     | -3.1 | 3.7E-08 | -2.7 | 4.2E-08 | -2.9 | 0.14 |
| RHOD      | -2.9 | 1.6E-11 | -2.8 | 2.1E-11 | -2.9 | 0.14 |
| ACOX2     | -3.0 | 6.4E-18 | -2.8 | 3.2E-17 | -2.9 | 0.13 |
| EPHA1     | -3.0 | 1.4E-15 | -2.7 | 2.0E-14 | -2.9 | 0.13 |
| MTBP      | -2.6 | 9.0E-12 | -3.2 | 1.9E-14 | -2.9 | 0.13 |
| HLA-DQA1  | -3.3 | 2.4E-18 | -2.5 | 1.9E-15 | -2.9 | 0.13 |
| PGR       | -2.9 | 3.4E-09 | -2.9 | 1.7E-10 | -2.9 | 0.13 |
| VLDLR     | -2.9 | 8.8E-18 | -2.9 | 1.3E-17 | -2.9 | 0.13 |
| CXCL1     | -2.8 | 1.8E-17 | -3.0 | 5.1E-18 | -2.9 | 0.13 |
| SH3RF2    | -3.2 | 9.6E-16 | -2.6 | 8.9E-14 | -2.9 | 0.13 |
| MYO1A     | -3.1 | 4.1E-18 | -2.7 | 5.0E-17 | -2.9 | 0.13 |
| DLG2      | -2.8 | 1.2E-12 | -3.0 | 1.1E-04 | -2.9 | 0.13 |
| MYOC      | -2.5 | 2.1E-11 | -3.3 | 2.4E-15 | -2.9 | 0.13 |
| NAP1L3    | -3.3 | 1.8E-17 | -2.5 | 9.0E-15 | -2.9 | 0.13 |
| NR1I2     | -3.4 | 8.4E-12 | -2.4 | 4.3E-09 | -2.9 | 0.13 |
| FAM176A   | -3.2 | 1.2E-13 | -2.6 | 3.7E-13 | -2.9 | 0.13 |
| ANXA1     | -2.8 | 1.5E-17 | -3.0 | 4.2E-18 | -2.9 | 0.13 |
| C2orf54   | -3.2 | 3.5E-17 | -2.6 | 1.7E-15 | -2.9 | 0.13 |
| ROR1      | -3.0 | 3.6E-16 | -2.9 | 6.3E-17 | -2.9 | 0.13 |
| HSD17B6   | -2.9 | 3.7E-17 | -3.0 | 7.1E-18 | -2.9 | 0.13 |
| NR3C2     | -2.5 | 7.6E-15 | -3.4 | 1.2E-18 | -2.9 | 0.13 |
| SYNJ2     | -2.9 | 2.1E-17 | -3.0 | 8.2E-18 | -2.9 | 0.13 |
| KCNK1     | -3.0 | 4.7E-18 | -2.9 | 9.5E-18 | -2.9 | 0.13 |
| PKP3      | -3.3 | 5.3E-19 | -2.6 | 1.2E-16 | -2.9 | 0.13 |
| TNFRSF8   | -2.7 | 3.0E-16 | -3.2 | 1.4E-18 | -2.9 | 0.13 |
| EPC2      | -3.8 | 6.4E-17 | -2.1 | 4.7E-12 | -3.0 | 0.13 |
| CDKN1C    | -3.1 | 1.5E-18 | -2.8 | 2.7E-17 | -3.0 | 0.13 |
| RAB25     | -3.0 | 7.0E-18 | -2.9 | 7.9E-18 | -3.0 | 0.13 |
| HSPB7     | -2.8 | 3.2E-07 | -3.1 | 6.7E-08 | -3.0 | 0.13 |
| NR4A3     | -3.0 | 6.2E-18 | -3.0 | 5.0E-18 | -3.0 | 0.13 |
| PI16      | -2.8 | 3.3E-16 | -3.2 | 2.7E-18 | -3.0 | 0.13 |
| LOH3CR2A  | -3.2 | 2.2E-15 | -2.8 | 2.8E-14 | -3.0 | 0.13 |
| TMEM90B   | -3.0 | 5.4E-09 | -3.0 | 8.1E-11 | -3.0 | 0.13 |
| HLF       | -2.9 | 9.9E-18 | -3.0 | 4.6E-18 | -3.0 | 0.13 |

|          |      |         |      |         |      |      |
|----------|------|---------|------|---------|------|------|
| S100A16  | -3.1 | 1.6E-18 | -2.8 | 1.6E-17 | -3.0 | 0.13 |
| RHBG     | -3.2 | 1.2E-18 | -2.8 | 4.4E-17 | -3.0 | 0.13 |
| TOX3     | -2.9 | 1.9E-13 | -3.0 | 3.5E-15 | -3.0 | 0.13 |
| DEFB103A | -2.9 | 2.3E-15 | -3.1 | 1.0E-16 | -3.0 | 0.13 |
| TNXB     | -3.1 | 2.0E-18 | -2.9 | 1.1E-17 | -3.0 | 0.13 |
| C1orf177 | -3.2 | 2.3E-13 | -2.8 | 7.0E-14 | -3.0 | 0.13 |
| MYO7B    | -3.5 | 6.8E-18 | -2.5 | 1.0E-14 | -3.0 | 0.13 |
| SERPINB5 | -3.0 | 7.3E-18 | -3.0 | 7.3E-18 | -3.0 | 0.13 |
| ME1      | -3.0 | 9.1E-17 | -3.0 | 8.5E-18 | -3.0 | 0.13 |
| SLC6A14  | -3.4 | 7.5E-12 | -2.6 | 1.7E-10 | -3.0 | 0.13 |
| MEP1A    | -3.5 | 5.0E-17 | -2.4 | 4.1E-14 | -3.0 | 0.13 |
| SLC6A20  | -3.2 | 1.2E-17 | -2.8 | 1.2E-16 | -3.0 | 0.13 |
| SLC6A4   | -3.6 | 8.5E-16 | -2.4 | 1.1E-12 | -3.0 | 0.13 |
| LRRC31   | -3.0 | 1.5E-12 | -3.0 | 5.5E-14 | -3.0 | 0.13 |
| E2F1     | -3.2 | 1.4E-18 | -2.8 | 1.9E-17 | -3.0 | 0.13 |
| GSTA3    | -2.9 | 1.1E-17 | -3.1 | 2.6E-18 | -3.0 | 0.13 |
| NOX1     | -3.5 | 2.9E-12 | -2.5 | 1.5E-10 | -3.0 | 0.12 |
| C13orf33 | -3.2 | 1.9E-18 | -2.8 | 3.6E-17 | -3.0 | 0.12 |
| IL1F5    | -3.3 | 5.0E-11 | -2.7 | 1.8E-10 | -3.0 | 0.12 |
| KRT15    | -3.4 | 2.1E-19 | -2.6 | 1.2E-16 | -3.0 | 0.12 |
| IGHA1    | -3.3 | 1.2E-09 | -2.8 | 6.5E-10 | -3.0 | 0.12 |
| C7       | -3.2 | 6.2E-19 | -2.8 | 2.1E-17 | -3.0 | 0.12 |
| GAS1     | -2.9 | 8.7E-18 | -3.1 | 1.2E-18 | -3.0 | 0.12 |
| WDR69    | -2.5 | 2.4E-05 | -3.6 | 4.5E-09 | -3.0 | 0.12 |
| PLA2G16  | -2.9 | 6.4E-18 | -3.1 | 1.3E-18 | -3.0 | 0.12 |
| PRDM5    | -3.2 | 1.1E-09 | -2.9 | 1.4E-09 | -3.0 | 0.12 |
| PLCL2    | -3.2 | 1.0E-17 | -2.9 | 2.9E-17 | -3.0 | 0.12 |
| SIM2     | -3.1 | 1.1E-17 | -3.0 | 8.8E-18 | -3.1 | 0.12 |
| C6       | -3.4 | 6.2E-12 | -2.7 | 1.7E-12 | -3.1 | 0.12 |
| PCSK2    | -3.8 | 8.8E-14 | -2.3 | 2.9E-09 | -3.1 | 0.12 |
| KCTD8    | -2.9 | 9.2E-08 | -3.2 | 1.0E-10 | -3.1 | 0.12 |
| CACNA2D3 | -3.4 | 1.7E-15 | -2.8 | 1.5E-14 | -3.1 | 0.12 |
| ATP8B2   | -3.5 | 3.3E-16 | -2.7 | 2.9E-15 | -3.1 | 0.12 |
| ATP8B4   | -3.5 | 3.3E-16 | -2.7 | 2.9E-15 | -3.1 | 0.12 |
| C19orf21 | -3.4 | 2.8E-19 | -2.8 | 3.4E-17 | -3.1 | 0.12 |
| ATP1B1   | -3.2 | 1.1E-18 | -3.0 | 4.9E-18 | -3.1 | 0.12 |
| JUNB     | -3.4 | 2.7E-19 | -2.8 | 2.2E-17 | -3.1 | 0.12 |
| COL17A1  | -3.2 | 1.3E-12 | -2.9 | 2.5E-14 | -3.1 | 0.12 |
| TSPAN5   | -3.1 | 1.5E-18 | -3.0 | 3.2E-18 | -3.1 | 0.12 |
| ACSM1    | -3.6 | 3.1E-14 | -2.6 | 4.4E-12 | -3.1 | 0.12 |
| RBM11    | -2.9 | 1.8E-07 | -3.3 | 7.9E-11 | -3.1 | 0.12 |
| LEFTY1   | -3.4 | 1.6E-18 | -2.9 | 2.6E-17 | -3.1 | 0.12 |
| ADAMTS16 | -3.2 | 5.8E-18 | -3.0 | 1.0E-17 | -3.1 | 0.11 |
| MYH11    | -3.5 | 1.1E-19 | -2.8 | 3.5E-17 | -3.1 | 0.11 |
| SCML4    | -3.4 | 1.9E-11 | -2.9 | 1.1E-10 | -3.1 | 0.11 |
| DIRAS3   | -3.4 | 2.8E-19 | -2.9 | 1.4E-17 | -3.1 | 0.11 |
| FOSL2    | -3.3 | 9.5E-18 | -3.0 | 2.8E-17 | -3.1 | 0.11 |
| EFCAB1   | -3.7 | 4.9E-18 | -2.5 | 8.7E-15 | -3.1 | 0.11 |
| FOXJ1    | -3.5 | 2.0E-19 | -2.8 | 2.3E-17 | -3.1 | 0.11 |
| SERPINB1 | -3.3 | 3.4E-19 | -3.0 | 5.4E-18 | -3.1 | 0.11 |
| C4BPA    | -3.0 | 1.8E-17 | -3.3 | 9.7E-19 | -3.1 | 0.11 |
| SUSD3    | -3.2 | 7.3E-19 | -3.1 | 1.9E-18 | -3.2 | 0.11 |
| APOBEC1  | -3.3 | 2.9E-10 | -3.0 | 3.2E-10 | -3.2 | 0.11 |
| C6orf97  | -2.8 | 3.1E-07 | -3.5 | 1.1E-08 | -3.2 | 0.11 |
| DEFB4A   | -3.5 | 9.4E-20 | -2.8 | 3.1E-17 | -3.2 | 0.11 |
| DEFB4B   | -3.5 | 9.4E-20 | -2.8 | 3.1E-17 | -3.2 | 0.11 |
| TREML2   | -3.1 | 4.6E-18 | -3.2 | 1.1E-18 | -3.2 | 0.11 |
| LRRC34   | -3.5 | 8.9E-18 | -2.9 | 8.1E-17 | -3.2 | 0.11 |
| DDX3Y    | -3.6 | 1.3E-12 | -2.7 | 4.6E-11 | -3.2 | 0.11 |
| KLHL4    | -2.8 | 1.6E-07 | -3.5 | 3.8E-08 | -3.2 | 0.11 |
| CCDC89   | -3.5 | 1.8E-12 | -2.9 | 4.8E-10 | -3.2 | 0.11 |
| SPAG1    | -3.6 | 2.6E-13 | -2.8 | 7.6E-13 | -3.2 | 0.11 |

|            |      |         |      |         |      |      |
|------------|------|---------|------|---------|------|------|
| RAI2       | -3.1 | 1.4E-18 | -3.2 | 6.3E-19 | -3.2 | 0.11 |
| APOBEC3B   | -2.9 | 1.2E-13 | -3.5 | 7.8E-18 | -3.2 | 0.11 |
| CELA2A     | -3.6 | 9.9E-20 | -2.8 | 3.4E-17 | -3.2 | 0.11 |
| ODZ4       | -2.7 | 5.8E-06 | -3.7 | 3.2E-09 | -3.2 | 0.11 |
| FRK        | -3.6 | 5.5E-12 | -2.8 | 2.5E-11 | -3.2 | 0.11 |
| BACH2      | -3.7 | 6.2E-16 | -2.7 | 2.5E-15 | -3.2 | 0.11 |
| TNS4       | -3.3 | 3.4E-19 | -3.1 | 1.9E-18 | -3.2 | 0.11 |
| PVRL3      | -3.5 | 5.3E-17 | -2.9 | 1.4E-16 | -3.2 | 0.11 |
| PRSS2      | -3.3 | 4.4E-19 | -3.1 | 1.4E-18 | -3.2 | 0.11 |
| TRY6       | -3.3 | 4.4E-19 | -3.1 | 1.4E-18 | -3.2 | 0.11 |
| C13orf29   | -4.2 | 4.0E-17 | -2.2 | 1.1E-12 | -3.2 | 0.11 |
| TNFRSF17   | -3.5 | 1.2E-11 | -3.0 | 2.5E-10 | -3.2 | 0.11 |
| RASD1      | -3.5 | 8.2E-20 | -2.9 | 7.9E-18 | -3.2 | 0.11 |
| ITLN1      | -3.2 | 4.7E-18 | -3.3 | 1.0E-18 | -3.2 | 0.11 |
| RRAD       | -3.4 | 2.6E-19 | -3.1 | 1.4E-18 | -3.2 | 0.11 |
| FAM54A     | -3.2 | 1.0E-18 | -3.3 | 4.2E-19 | -3.3 | 0.10 |
| ATF3       | -3.3 | 5.4E-19 | -3.3 | 5.2E-19 | -3.3 | 0.10 |
| CLIC3      | -3.3 | 5.8E-17 | -3.2 | 8.5E-17 | -3.3 | 0.10 |
| TRAF3IP2   | -3.9 | 2.5E-17 | -2.6 | 4.4E-14 | -3.3 | 0.10 |
| NR4A2      | -3.4 | 1.8E-19 | -3.1 | 1.6E-18 | -3.3 | 0.10 |
| PDZK1IP1   | -3.6 | 7.3E-20 | -2.9 | 7.3E-18 | -3.3 | 0.10 |
| PLP1       | -3.2 | 1.8E-09 | -3.3 | 2.4E-06 | -3.3 | 0.10 |
| IL8        | -3.3 | 4.5E-19 | -3.3 | 5.2E-19 | -3.3 | 0.10 |
| FOSB       | -3.7 | 3.5E-20 | -2.9 | 1.4E-17 | -3.3 | 0.10 |
| ANKRD22    | -3.2 | 1.6E-18 | -3.3 | 4.8E-19 | -3.3 | 0.10 |
| GATM       | -3.3 | 4.8E-19 | -3.3 | 4.3E-19 | -3.3 | 0.10 |
| WT1AS      | -3.5 | 1.7E-19 | -3.1 | 2.0E-18 | -3.3 | 0.10 |
| NOD2       | -3.7 | 4.2E-18 | -2.9 | 7.0E-17 | -3.3 | 0.10 |
| TMOD1      | -3.4 | 2.4E-19 | -3.2 | 8.3E-19 | -3.3 | 0.10 |
| KCNK5      | -3.5 | 1.4E-19 | -3.1 | 1.5E-18 | -3.3 | 0.10 |
| GDA        | -4.1 | 8.0E-19 | -2.5 | 3.0E-15 | -3.3 | 0.10 |
| EPB41L5    | -3.7 | 2.6E-18 | -2.9 | 9.0E-17 | -3.3 | 0.10 |
| ANKRD29    | -4.3 | 7.2E-19 | -2.4 | 1.5E-14 | -3.3 | 0.10 |
| WT1        | -3.6 | 1.1E-18 | -3.0 | 2.9E-17 | -3.3 | 0.10 |
| TGFBR3     | -3.5 | 1.9E-19 | -3.2 | 9.9E-19 | -3.3 | 0.10 |
| ARSJ       | -4.0 | 1.9E-16 | -2.7 | 3.9E-14 | -3.3 | 0.10 |
| IL1F9      | -3.3 | 1.8E-18 | -3.4 | 3.5E-19 | -3.3 | 0.10 |
| GALNT5     | -3.6 | 7.0E-19 | -3.1 | 5.3E-18 | -3.3 | 0.10 |
| PARD3B     | -3.3 | 8.0E-10 | -3.4 | 1.8E-09 | -3.3 | 0.10 |
| FAM198B    | -3.4 | 2.4E-19 | -3.3 | 3.6E-19 | -3.3 | 0.10 |
| CXCL12     | -3.5 | 9.3E-20 | -3.2 | 9.7E-19 | -3.4 | 0.10 |
| S100A10    | -3.4 | 1.5E-19 | -3.3 | 4.9E-19 | -3.4 | 0.10 |
| SLC1A7     | -3.8 | 3.7E-20 | -3.0 | 6.5E-18 | -3.4 | 0.10 |
| CASP12     | -3.1 | 1.3E-08 | -3.6 | 6.9E-10 | -3.4 | 0.10 |
| CST6       | -4.0 | 3.1E-16 | -2.7 | 1.6E-13 | -3.4 | 0.10 |
| ST6GALNAC5 | -3.1 | 4.0E-09 | -3.6 | 7.1E-09 | -3.4 | 0.10 |
| POF1B      | -3.2 | 7.8E-18 | -3.5 | 2.3E-19 | -3.4 | 0.10 |
| FOXO1      | -3.6 | 6.1E-20 | -3.1 | 1.2E-18 | -3.4 | 0.10 |
| AMBP       | -3.5 | 5.6E-13 | -3.3 | 2.8E-14 | -3.4 | 0.10 |
| TMPRSS11E  | -3.8 | 2.6E-18 | -2.9 | 1.7E-16 | -3.4 | 0.10 |
| ZFP36      | -3.5 | 1.0E-19 | -3.3 | 5.3E-19 | -3.4 | 0.10 |
| CYP11A1    | -4.0 | 5.8E-20 | -2.8 | 1.1E-16 | -3.4 | 0.10 |
| BSPRY      | -3.3 | 5.1E-19 | -3.5 | 1.7E-19 | -3.4 | 0.10 |
| LRRC8E     | -4.2 | 5.5E-16 | -2.6 | 4.9E-13 | -3.4 | 0.09 |
| ITLN2      | -3.9 | 1.0E-18 | -2.9 | 9.6E-17 | -3.4 | 0.09 |
| CXCL11     | -3.1 | 2.5E-09 | -3.7 | 2.6E-09 | -3.4 | 0.09 |
| FAM26F     | -3.5 | 1.4E-19 | -3.4 | 3.0E-19 | -3.4 | 0.09 |
| SLCO1B3    | -3.6 | 9.1E-13 | -3.2 | 7.1E-12 | -3.4 | 0.09 |
| APOBEC3C   | -3.3 | 2.8E-17 | -3.5 | 7.8E-18 | -3.4 | 0.09 |
| COLEC11    | -3.4 | 1.9E-19 | -3.4 | 1.5E-19 | -3.4 | 0.09 |
| DPP4       | -3.6 | 7.4E-20 | -3.3 | 4.8E-19 | -3.4 | 0.09 |
| SLC3A1     | -3.2 | 3.1E-17 | -3.7 | 1.3E-19 | -3.4 | 0.09 |

|           |      |         |      |         |      |      |
|-----------|------|---------|------|---------|------|------|
| ADH7      | -3.0 | 1.1E-08 | -3.9 | 1.4E-10 | -3.4 | 0.09 |
| IGHG2     | -4.0 | 9.8E-21 | -2.9 | 6.9E-18 | -3.4 | 0.09 |
| KIAA1324  | -3.9 | 2.6E-18 | -3.0 | 7.9E-16 | -3.4 | 0.09 |
| RBP1      | -3.8 | 2.2E-20 | -3.1 | 1.6E-18 | -3.5 | 0.09 |
| SCML1     | -3.5 | 1.0E-19 | -3.4 | 2.3E-19 | -3.5 | 0.09 |
| JUN       | -3.8 | 2.1E-20 | -3.1 | 1.5E-18 | -3.5 | 0.09 |
| HCP5      | -3.9 | 3.6E-20 | -3.1 | 3.1E-18 | -3.5 | 0.09 |
| AMHR2     | -4.6 | 1.8E-18 | -2.4 | 1.7E-13 | -3.5 | 0.09 |
| KLK12     | -3.9 | 9.0E-19 | -3.1 | 3.7E-17 | -3.5 | 0.09 |
| CCDC80    | -3.7 | 4.9E-20 | -3.3 | 3.9E-19 | -3.5 | 0.09 |
| GOS2      | -3.6 | 5.4E-20 | -3.3 | 3.1E-19 | -3.5 | 0.09 |
| ITM2A     | -3.7 | 4.0E-20 | -3.3 | 4.0E-19 | -3.5 | 0.09 |
| NDP       | -3.8 | 1.1E-18 | -3.2 | 5.0E-18 | -3.5 | 0.09 |
| LGALS4    | -3.8 | 2.8E-20 | -3.2 | 7.6E-19 | -3.5 | 0.09 |
| CHMP4C    | -4.3 | 3.4E-20 | -2.7 | 1.5E-16 | -3.5 | 0.09 |
| SP5       | -3.5 | 9.4E-20 | -3.5 | 1.2E-19 | -3.5 | 0.09 |
| TDO2      | -4.2 | 6.1E-18 | -2.8 | 8.2E-16 | -3.5 | 0.09 |
| SLC38A11  | -3.9 | 8.2E-19 | -3.1 | 2.6E-17 | -3.5 | 0.09 |
| CSRNP1    | -4.0 | 7.6E-20 | -3.0 | 9.7E-18 | -3.5 | 0.09 |
| MCC       | -3.7 | 5.8E-19 | -3.4 | 1.7E-18 | -3.5 | 0.09 |
| FUT3      | -3.7 | 6.0E-20 | -3.4 | 3.3E-19 | -3.5 | 0.09 |
| KRT78     | -2.5 | 1.4E-05 | -4.6 | 2.1E-16 | -3.5 | 0.09 |
| CLCA2     | -4.3 | 2.2E-17 | -2.8 | 2.4E-15 | -3.6 | 0.09 |
| DPEP1     | -3.7 | 4.3E-20 | -3.5 | 1.4E-19 | -3.6 | 0.08 |
| CRYGD     | -4.0 | 2.6E-20 | -3.2 | 1.4E-18 | -3.6 | 0.08 |
| BIK       | -3.8 | 2.7E-20 | -3.3 | 3.3E-19 | -3.6 | 0.08 |
| KRT6C     | -4.1 | 6.5E-21 | -3.1 | 2.2E-18 | -3.6 | 0.08 |
| OVOL1     | -3.7 | 3.4E-20 | -3.4 | 2.2E-19 | -3.6 | 0.08 |
| BAMBI     | -3.6 | 6.6E-20 | -3.6 | 7.5E-20 | -3.6 | 0.08 |
| ADAMTS5   | -3.5 | 9.4E-20 | -3.6 | 5.1E-20 | -3.6 | 0.08 |
| PDZRN3    | -3.9 | 2.1E-20 | -3.3 | 5.1E-19 | -3.6 | 0.08 |
| RAB17     | -3.6 | 6.0E-16 | -3.6 | 6.4E-16 | -3.6 | 0.08 |
| ACSS3     | -3.7 | 9.6E-20 | -3.4 | 2.8E-19 | -3.6 | 0.08 |
| AR        | -3.6 | 1.0E-19 | -3.6 | 6.7E-20 | -3.6 | 0.08 |
| IGH@      | -4.0 | 9.8E-21 | -3.2 | 7.1E-19 | -3.6 | 0.08 |
| EBF1      | -3.8 | 3.6E-20 | -3.4 | 3.4E-19 | -3.6 | 0.08 |
| TMPRSS11D | -3.9 | 2.0E-19 | -3.3 | 1.5E-18 | -3.6 | 0.08 |
| LIMS3     | -3.5 | 1.4E-19 | -3.7 | 3.3E-20 | -3.6 | 0.08 |
| AGR2      | -3.7 | 3.6E-20 | -3.6 | 7.0E-20 | -3.6 | 0.08 |
| CPXM2     | -3.6 | 7.5E-20 | -3.7 | 3.6E-20 | -3.6 | 0.08 |
| REG1B     | -3.2 | 3.7E-11 | -4.1 | 7.4E-19 | -3.6 | 0.08 |
| SPRR2G    | -4.6 | 3.9E-21 | -2.7 | 1.4E-16 | -3.6 | 0.08 |
| CNTNAP2   | -3.6 | 6.7E-20 | -3.7 | 2.8E-10 | -3.6 | 0.08 |
| LGR6      | -3.9 | 3.0E-19 | -3.4 | 1.2E-18 | -3.7 | 0.08 |
| LOC26172  | -3.5 | 2.4E-18 | -3.8 | 1.3E-19 | -3.7 | 0.08 |
| COBL      | -3.9 | 3.8E-18 | -3.4 | 1.6E-17 | -3.7 | 0.08 |
| PROK1     | -4.2 | 5.2E-21 | -3.2 | 1.1E-18 | -3.7 | 0.08 |
| SPRR1B    | -4.1 | 7.3E-21 | -3.3 | 4.5E-19 | -3.7 | 0.08 |
| CXCL9     | -4.0 | 2.8E-20 | -3.3 | 1.0E-18 | -3.7 | 0.08 |
| ART3      | -3.6 | 1.8E-13 | -3.8 | 1.3E-15 | -3.7 | 0.08 |
| TFF3      | -3.9 | 1.0E-20 | -3.4 | 1.7E-19 | -3.7 | 0.08 |
| S100A4    | -3.9 | 1.2E-20 | -3.5 | 1.2E-19 | -3.7 | 0.08 |
| S100A14   | -4.0 | 8.1E-21 | -3.4 | 1.8E-19 | -3.7 | 0.08 |
| DUSP1     | -3.9 | 1.4E-20 | -3.5 | 8.3E-20 | -3.7 | 0.08 |
| MAL2      | -3.8 | 2.0E-20 | -3.6 | 5.0E-20 | -3.7 | 0.08 |
| KRT6A     | -4.3 | 2.4E-21 | -3.1 | 1.5E-18 | -3.7 | 0.08 |
| KNG1      | -4.1 | 1.0E-18 | -3.3 | 4.3E-18 | -3.7 | 0.08 |
| CD69      | -4.8 | 1.5E-19 | -2.6 | 1.4E-14 | -3.7 | 0.07 |
| GRIK1     | -4.2 | 7.8E-17 | -3.3 | 1.0E-15 | -3.7 | 0.07 |
| TTR       | -3.9 | 3.3E-18 | -3.6 | 5.6E-18 | -3.8 | 0.07 |
| SLITRK4   | -4.0 | 1.6E-20 | -3.5 | 1.5E-19 | -3.8 | 0.07 |
| DES       | -4.1 | 6.5E-21 | -3.4 | 1.9E-19 | -3.8 | 0.07 |

|          |      |         |      |         |      |       |
|----------|------|---------|------|---------|------|-------|
| OSR2     | -3.7 | 2.9E-20 | -3.8 | 1.7E-20 | -3.8 | 0.07  |
| RGS22    | -4.0 | 8.0E-19 | -3.6 | 2.1E-18 | -3.8 | 0.07  |
| NRP2     | -4.8 | 3.8E-21 | -2.8 | 4.8E-17 | -3.8 | 0.07  |
| MAL      | -4.2 | 3.3E-21 | -3.4 | 1.6E-19 | -3.8 | 0.07  |
| KLF2     | -3.9 | 1.1E-20 | -3.8 | 2.6E-20 | -3.8 | 0.07  |
| PRUNE2   | -4.5 | 2.9E-19 | -3.2 | 3.2E-17 | -3.9 | 0.07  |
| ATP1A2   | -4.1 | 7.2E-21 | -3.6 | 6.1E-20 | -3.9 | 0.07  |
| ENPP6    | -4.5 | 1.9E-18 | -3.2 | 5.0E-16 | -3.9 | 0.07  |
| DCDC2    | -3.6 | 5.3E-19 | -4.2 | 1.7E-20 | -3.9 | 0.07  |
| TNFAIP3  | -4.2 | 3.3E-21 | -3.6 | 7.0E-20 | -3.9 | 0.07  |
| PHLDA2   | -4.1 | 6.2E-21 | -3.8 | 2.3E-20 | -3.9 | 0.066 |
| PENK     | -4.0 | 9.1E-21 | -3.8 | 1.8E-20 | -3.9 | 0.066 |
| FERMT1   | -3.9 | 1.4E-20 | -4.0 | 9.6E-21 | -3.9 | 0.065 |
| GJB2     | -4.2 | 1.5E-16 | -3.6 | 8.4E-17 | -3.9 | 0.065 |
| NET1     | -3.9 | 1.1E-20 | -3.9 | 1.1E-20 | -3.9 | 0.065 |
| PLN      | -3.8 | 1.5E-19 | -4.1 | 1.4E-20 | -3.9 | 0.065 |
| HKDC1    | -4.6 | 1.2E-21 | -3.3 | 3.6E-19 | -3.9 | 0.065 |
| ZG16B    | -4.3 | 2.8E-21 | -3.6 | 4.7E-20 | -4.0 | 0.064 |
| SLC27A6  | -3.6 | 6.0E-13 | -4.3 | 6.9E-14 | -4.0 | 0.064 |
| ECM2     | -4.2 | 5.2E-21 | -3.8 | 2.0E-20 | -4.0 | 0.063 |
| C10orf81 | -4.2 | 5.7E-20 | -3.8 | 6.6E-20 | -4.0 | 0.063 |
| CHRM3    | -4.6 | 4.0E-19 | -3.4 | 4.8E-16 | -4.0 | 0.062 |
| BRCA2    | -3.5 | 3.2E-15 | -4.5 | 2.4E-17 | -4.0 | 0.062 |
| TGM1     | -4.1 | 5.3E-21 | -3.9 | 1.2E-20 | -4.0 | 0.062 |
| WISP2    | -4.4 | 2.0E-21 | -3.7 | 4.2E-20 | -4.0 | 0.062 |
| EGR1     | -4.2 | 4.4E-21 | -3.9 | 1.4E-20 | -4.0 | 0.062 |
| TFCP2L1  | -4.5 | 3.0E-21 | -3.5 | 1.5E-19 | -4.0 | 0.061 |
| SBSN     | -4.3 | 1.3E-20 | -3.8 | 6.6E-20 | -4.0 | 0.061 |
| KRT16    | -4.4 | 3.8E-21 | -3.7 | 4.8E-20 | -4.0 | 0.061 |
| SLC16A9  | -4.0 | 8.1E-21 | -4.0 | 7.0E-21 | -4.0 | 0.061 |
| DSG3     | -3.6 | 6.5E-19 | -4.5 | 5.8E-21 | -4.0 | 0.061 |
| IL22RA1  | -4.7 | 9.6E-22 | -3.4 | 1.9E-19 | -4.1 | 0.060 |
| STK33    | -4.3 | 2.4E-20 | -3.8 | 7.3E-20 | -4.1 | 0.060 |
| TNNC2    | -4.4 | 2.3E-21 | -3.8 | 2.7E-20 | -4.1 | 0.060 |
| CD22     | -4.3 | 4.8E-21 | -3.8 | 3.0E-20 | -4.1 | 0.060 |
| GREB1    | -4.2 | 3.5E-21 | -3.9 | 1.2E-20 | -4.1 | 0.059 |
| OMD      | -3.7 | 9.4E-14 | -4.5 | 5.9E-16 | -4.1 | 0.058 |
| KLK7     | -3.5 | 9.7E-16 | -4.8 | 3.1E-19 | -4.1 | 0.058 |
| REG4     | -4.7 | 3.3E-21 | -3.6 | 2.0E-19 | -4.1 | 0.057 |
| CLSTN2   | -4.5 | 3.1E-20 | -3.8 | 8.7E-20 | -4.1 | 0.057 |
| C10orf82 | -4.7 | 4.7E-21 | -3.6 | 2.0E-19 | -4.1 | 0.057 |
| SYBU     | -4.4 | 2.6E-21 | -3.9 | 1.1E-20 | -4.2 | 0.056 |
| CPZ      | -4.6 | 1.3E-21 | -3.8 | 2.9E-20 | -4.2 | 0.055 |
| CRNN     | -4.5 | 1.7E-21 | -3.9 | 1.7E-20 | -4.2 | 0.055 |
| KCNMB2   | -4.1 | 3.0E-16 | -4.3 | 9.0E-18 | -4.2 | 0.055 |
| IL1A     | -3.9 | 8.3E-15 | -4.5 | 3.4E-16 | -4.2 | 0.055 |
| IL1RN    | -4.5 | 1.3E-21 | -3.9 | 1.1E-20 | -4.2 | 0.054 |
| RGN      | -4.9 | 7.7E-20 | -3.7 | 1.1E-18 | -4.3 | 0.052 |
| CLDN3    | -4.4 | 1.8E-21 | -4.2 | 4.3E-21 | -4.3 | 0.051 |
| GSTA1    | -5.1 | 5.5E-22 | -3.5 | 1.5E-19 | -4.3 | 0.051 |
| CKMT2    | -4.4 | 2.2E-18 | -4.2 | 1.4E-18 | -4.3 | 0.051 |
| KLK8     | -4.5 | 1.9E-21 | -4.1 | 5.5E-21 | -4.3 | 0.051 |
| DAPL1    | -4.4 | 2.5E-21 | -4.2 | 3.6E-21 | -4.3 | 0.051 |
| CLDN1    | -4.3 | 2.2E-21 | -4.3 | 2.7E-21 | -4.3 | 0.050 |
| S100A9   | -4.6 | 1.1E-21 | -4.1 | 5.0E-21 | -4.3 | 0.050 |
| AGMAT    | -4.5 | 2.3E-21 | -4.2 | 4.6E-21 | -4.3 | 0.049 |
| C6orf123 | -4.5 | 1.8E-18 | -4.2 | 3.6E-18 | -4.3 | 0.049 |
| PERP     | -4.4 | 1.9E-21 | -4.4 | 1.8E-21 | -4.4 | 0.048 |
| DUSP26   | -4.6 | 9.3E-22 | -4.2 | 3.6E-21 | -4.4 | 0.047 |
| SCEL     | -4.5 | 5.9E-21 | -4.4 | 4.1E-21 | -4.4 | 0.046 |
| STAR     | -4.8 | 5.4E-22 | -4.1 | 6.5E-21 | -4.4 | 0.046 |
| RLN2     | -4.4 | 4.1E-21 | -4.5 | 2.5E-21 | -4.4 | 0.046 |

|            |      |         |      |         |      |       |
|------------|------|---------|------|---------|------|-------|
| MUC13      | -4.9 | 3.3E-21 | -4.0 | 4.9E-20 | -4.4 | 0.046 |
| SELE       | -4.6 | 2.4E-19 | -4.3 | 3.6E-20 | -4.5 | 0.045 |
| ANXA3      | -4.4 | 2.0E-21 | -4.6 | 1.0E-21 | -4.5 | 0.045 |
| IL23A      | -4.5 | 1.6E-21 | -4.5 | 1.4E-21 | -4.5 | 0.045 |
| SMOC2      | -4.5 | 1.2E-21 | -4.5 | 1.4E-21 | -4.5 | 0.044 |
| SULT1C2    | -4.2 | 2.2E-18 | -4.8 | 1.2E-20 | -4.5 | 0.044 |
| ANGPTL1    | -4.9 | 5.9E-22 | -4.2 | 4.3E-21 | -4.5 | 0.044 |
| CFTR       | -5.0 | 3.8E-22 | -4.1 | 6.3E-21 | -4.5 | 0.043 |
| EREG       | -4.9 | 3.4E-21 | -4.1 | 1.5E-20 | -4.5 | 0.043 |
| LRRC2      | -4.5 | 4.9E-19 | -4.6 | 1.2E-20 | -4.5 | 0.043 |
| ABI3BP     | -3.9 | 2.6E-20 | -5.2 | 3.3E-22 | -4.6 | 0.043 |
| TMPPRSS11B | -4.5 | 4.0E-18 | -4.6 | 8.1E-19 | -4.6 | 0.042 |
| FOS        | -5.0 | 3.7E-22 | -4.2 | 3.2E-21 | -4.6 | 0.041 |
| GATA6      | -4.9 | 4.9E-22 | -4.4 | 2.0E-21 | -4.6 | 0.041 |
| C20orf103  | -5.0 | 3.4E-22 | -4.2 | 3.5E-21 | -4.6 | 0.040 |
| PLA2G12B   | -4.7 | 2.1E-21 | -4.6 | 1.5E-18 | -4.7 | 0.039 |
| UGT8       | -4.8 | 1.9E-20 | -4.5 | 1.1E-18 | -4.7 | 0.039 |
| GSTA5      | -5.3 | 2.4E-22 | -4.0 | 8.3E-21 | -4.7 | 0.039 |
| TMC5       | -4.9 | 5.4E-22 | -4.5 | 1.4E-21 | -4.7 | 0.038 |
| IGSF10     | -5.0 | 1.5E-21 | -4.4 | 3.5E-21 | -4.7 | 0.038 |
| SERPINB3   | -5.1 | 3.7E-22 | -4.4 | 1.8E-21 | -4.7 | 0.037 |
| CDH17      | -5.1 | 1.6E-20 | -4.4 | 3.0E-20 | -4.7 | 0.037 |
| IL1RAP     | -4.2 | 6.0E-18 | -5.3 | 4.9E-20 | -4.8 | 0.037 |
| EGR3       | -5.9 | 2.5E-22 | -3.7 | 7.2E-20 | -4.8 | 0.036 |
| PROX1      | -5.0 | 3.7E-20 | -4.6 | 2.6E-19 | -4.8 | 0.036 |
| DNAJC12    | -5.1 | 3.2E-22 | -4.5 | 1.3E-21 | -4.8 | 0.036 |
| C11orf21   | -5.6 | 5.6E-22 | -4.1 | 1.5E-20 | -4.8 | 0.035 |
| PLCXD3     | -4.7 | 4.4E-20 | -5.0 | 1.3E-20 | -4.8 | 0.035 |
| LRRC17     | -5.2 | 3.3E-22 | -4.5 | 1.5E-21 | -4.8 | 0.035 |
| TSPAN8     | -5.0 | 3.4E-22 | -4.7 | 8.2E-22 | -4.8 | 0.035 |
| SPRR3      | -5.4 | 1.6E-22 | -4.3 | 2.9E-21 | -4.8 | 0.035 |
| C15orf48   | -5.4 | 2.7E-22 | -4.3 | 3.1E-21 | -4.9 | 0.035 |
| PRR15L     | -4.9 | 4.1E-22 | -4.8 | 6.1E-22 | -4.9 | 0.034 |
| ANXA13     | -5.8 | 3.0E-22 | -3.9 | 2.2E-20 | -4.9 | 0.034 |
| RNF186     | -4.7 | 2.0E-21 | -5.2 | 4.3E-22 | -4.9 | 0.033 |
| ANGPTL5    | -5.7 | 6.2E-22 | -4.2 | 1.2E-20 | -4.9 | 0.032 |
| KRT23      | -5.3 | 2.0E-22 | -4.6 | 9.2E-22 | -5.0 | 0.032 |
| GNLY       | -6.2 | 1.2E-22 | -3.9 | 2.4E-20 | -5.0 | 0.031 |
| DLK1       | -5.4 | 1.8E-22 | -4.7 | 7.7E-22 | -5.0 | 0.031 |
| CRCT1      | -5.9 | 9.0E-23 | -4.1 | 4.9E-21 | -5.0 | 0.031 |
| CLRN3      | -5.5 | 1.6E-22 | -4.6 | 8.9E-22 | -5.1 | 0.030 |
| SPRR2D     | -5.4 | 1.8E-22 | -4.7 | 6.8E-22 | -5.1 | 0.030 |
| CEACAM6    | -5.5 | 1.6E-22 | -4.7 | 7.8E-22 | -5.1 | 0.030 |
| SFRP4      | -5.1 | 3.0E-22 | -5.1 | 2.8E-22 | -5.1 | 0.029 |
| KRT6B      | -5.7 | 1.1E-22 | -4.6 | 1.1E-21 | -5.1 | 0.029 |
| AKR1B10    | -6.1 | 1.7E-22 | -4.1 | 7.1E-21 | -5.1 | 0.029 |
| WISP3      | -4.6 | 1.6E-19 | -5.6 | 2.4E-21 | -5.1 | 0.029 |
| FAM70A     | -5.9 | 3.4E-22 | -4.4 | 3.4E-21 | -5.1 | 0.028 |
| CXorf61    | -5.4 | 1.2E-21 | -4.9 | 2.1E-21 | -5.1 | 0.028 |
| IGFBP1     | -5.0 | 6.5E-22 | -5.3 | 2.3E-22 | -5.2 | 0.028 |
| CXCL3      | -5.6 | 1.3E-22 | -4.8 | 5.1E-22 | -5.2 | 0.027 |
| AADAC      | -5.7 | 6.7E-22 | -4.8 | 1.9E-21 | -5.2 | 0.027 |
| KLK6       | -6.1 | 1.0E-22 | -4.4 | 2.6E-21 | -5.2 | 0.027 |
| FOXL2      | -5.7 | 1.1E-22 | -4.9 | 4.5E-22 | -5.3 | 0.025 |
| FABP1      | -6.0 | 7.5E-23 | -4.6 | 9.6E-22 | -5.3 | 0.025 |
| VIL1       | -6.0 | 7.9E-23 | -4.7 | 7.7E-22 | -5.3 | 0.025 |
| S100A8     | -5.7 | 1.0E-22 | -4.9 | 4.1E-22 | -5.3 | 0.025 |
| S100A7     | -6.4 | 7.4E-23 | -4.3 | 3.0E-21 | -5.3 | 0.025 |
| FGFBP1     | -6.4 | 7.0E-23 | -4.3 | 2.9E-21 | -5.4 | 0.024 |
| KRT24      | -6.6 | 6.4E-23 | -4.3 | 3.6E-21 | -5.5 | 0.023 |
| NROB1      | -5.8 | 2.9E-22 | -5.1 | 7.7E-22 | -5.5 | 0.023 |
| CXCL2      | -6.1 | 6.7E-23 | -4.9 | 4.5E-22 | -5.5 | 0.022 |

|        |      |         |      |         |      |       |
|--------|------|---------|------|---------|------|-------|
| RPS4Y2 | -5.9 | 3.2E-22 | -5.3 | 4.0E-22 | -5.6 | 0.021 |
| OGN    | -6.1 | 7.6E-23 | -5.2 | 2.8E-22 | -5.6 | 0.020 |
| SPRR1A | -6.3 | 5.7E-23 | -5.1 | 2.9E-22 | -5.7 | 0.019 |
| CSTA   | -6.1 | 1.5E-22 | -5.2 | 2.4E-22 | -5.7 | 0.019 |
| GUCY2C | -6.4 | 6.2E-23 | -5.1 | 3.4E-22 | -5.7 | 0.019 |
| DDC    | -7.4 | 3.1E-23 | -4.7 | 8.7E-22 | -6.0 | 0.015 |
| VIT    | -6.5 | 8.5E-23 | -5.6 | 1.5E-22 | -6.1 | 0.015 |
| CCL20  | -6.3 | 6.1E-23 | -5.9 | 8.7E-23 | -6.1 | 0.015 |
| UBD    | -6.9 | 3.6E-23 | -5.6 | 1.3E-22 | -6.2 | 0.013 |
| RPS4Y1 | -7.1 | 4.5E-23 | -5.6 | 1.5E-22 | -6.4 | 0.012 |
| VWC2   | -6.3 | 1.2E-22 | -6.4 | 6.8E-23 | -6.4 | 0.012 |
| FOXA2  | -7.0 | 3.6E-23 | -6.0 | 7.6E-23 | -6.5 | 0.011 |
| SCN7A  | -6.5 | 7.4E-23 | -6.7 | 5.0E-23 | -6.6 | 0.010 |
| MUM1L1 | -7.6 | 2.9E-23 | -8.6 | 2.1E-23 | -8.1 | 0.004 |
