# Supplementary figures and images for: Molecular Characterization of a Patient's Small Cell Carcinoma of the Ovary of the Hypercalcemic Type
Source: PubMed Central journal article supplement — J Cancer. 2012 Jan 26;3:58–66. doi: 10.7150/jca.3872 (PMC3273708; doi:10.7150/jca.3872), 2012-01-26

Figure S1.

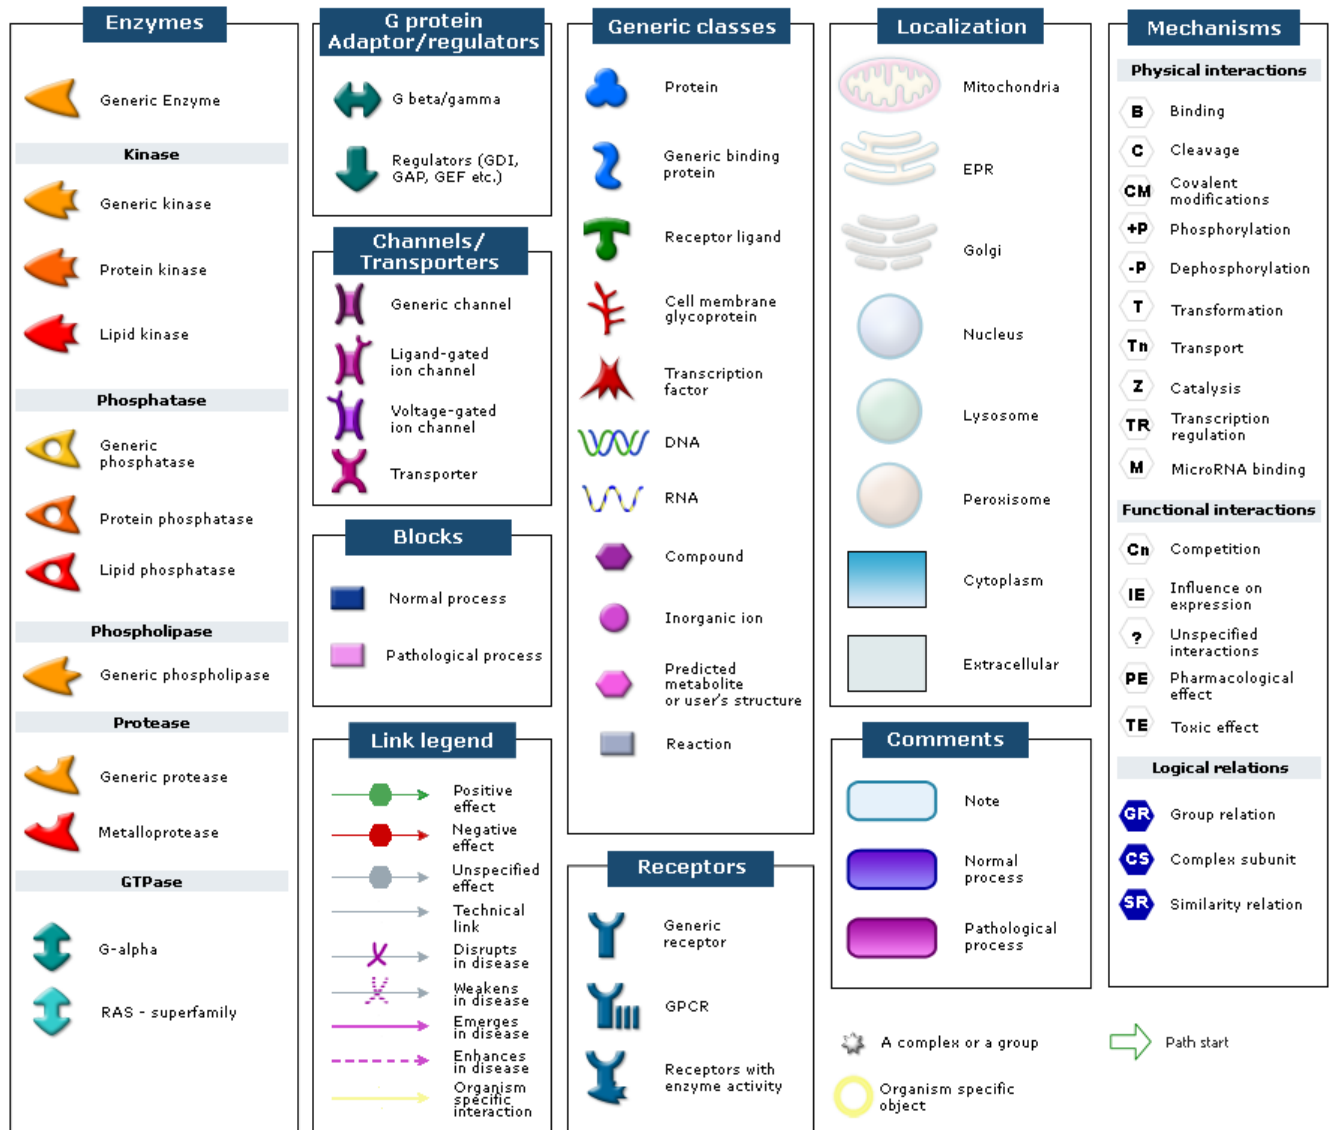

Supplement: jcav03p0058s2.pdf [file jcav03p0058s2.pdf]
